# Supplementary material for: Constraining the geotherm beneath the British Isles from Bayesian inversion of Curie depth: integrated modelling of magnetic, geothermal, and seismic data
Source: Copernicus journal article supplement (doi:10.5194/se-10-839-2019), 2019-06-13
Supplement: Supplementary file 1 [file se-10-839-2019-supplement.zip]

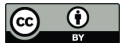

## *Supplement of*

# **Constraining the geotherm beneath the British Isles from Bayesian inversion of Curie depth: integrated modelling of magnetic, geothermal, and seismic data**

**Ben Mather and Javier Fullea**

*Correspondence to:* Ben Mather ([bmather@cp.dias.ie](mailto:bmather@cp.dias.ie))

- [se-10-839-2019-supplement-title-page.pdf](#)
- [supplementary\\_data.dat](#)

The copyright of individual parts of the supplement might differ from the CC BY 4.0 License.
