# Supplementary material for: Constraining the geotherm beneath the British Isles from Bayesian inversion of Curie depth: integrated modelling of magnetic, geothermal, and seismic data
Source: Copernicus journal article supplement (doi:10.5194/se-10-839-2019), 2019-06-13
Supplement: Supplementary file 2 [file se-10-839-2019-supplement.zip]

Archive with 2 entries (2 files):
- supplementary_data.dat
- se-10-839-2019-supplement-title-page.pdf
