# Supplementary material for: Constraining the geotherm beneath the British Isles from Bayesian inversion of Curie depth: integrated modelling of magnetic, geothermal, and seismic data
Source: Copernicus journal article supplement (doi:10.5194/se-10-839-2019), 2019-06-13
Supplement: Supplementary file 2 [file se-10-839-2019-supplement.zip › supplementary_data.dat]

lon lat beta C cpd sigma_cpd window_size qs sigma_qs
-10.8 49.5 6.3 10.1 30 7.4 525 58.8 18.6
-10.78 49.5 6.3 10.1 30.1 7.5 525 58.7 18.8
-10.7599 49.5 6.3 10.1 30.2 7.5 525 58.8 19.3
-10.7399 49.5 6.3 10.1 30.2 7.6 525 58.8 19.7
-10.7199 49.5 6.3 10.1 30.4 7.7 525 58.8 20
-10.6998 49.5 6.3 10.1 30.5 7.8 525 58.9 20.3
-10.6798 49.5 6.3 10 30.6 7.9 525 59 20.6
-10.6598 49.5 6.3 10 30.7 8 525 58.9 20.9
-10.6397 49.5 6.3 10 30.8 8.1 525 58.7 21.2
-10.6197 49.5 6.3 10 30.8 8.1 536 58.6 21.5
-10.5997 49.5 6.3 10.1 30.9 8.1 550 58.8 21.8
-10.5797 49.5 6.3 10.1 30.9 8.2 550 58.9 22.1
-10.5596 49.5 6.3 10.1 30.9 8.2 550 59.2 22.3
-10.5396 49.5 6.3 10.1 31 8.2 550 59.2 22.5
-10.5196 49.5 6.3 10.1 31 8.3 550 59.2 22.7
-10.4995 49.5 6.3 10.1 31 8.3 550 59.2 23
-10.4795 49.5 6.3 10.1 31.1 8.3 550 59.2 23.4
-10.4595 49.5 6.3 10.1 31.1 8.4 550 59.1 23.8
-10.4394 49.5 6.3 10.1 31.2 8.4 550 59.1 23.9
-10.4194 49.5 6.3 10.1 31.2 8.5 550 59.1 24
-10.3994 49.5 6.3 10.1 31.3 8.5 550 59.1 24.3
-10.3793 49.5 6.3 10.1 31.3 8.6 550 59 24.6
-10.3593 49.5 6.3 10.2 31.4 8.6 550 59 25
-10.3393 49.5 6.3 10.2 31.4 8.7 574 59 25.3
-10.3192 49.5 6.3 10.2 31.4 8.7 575 59 25.9
-10.2992 49.5 6.3 10.2 31.5 8.8 575 59 26.4
-10.2792 49.5 6.3 10.2 31.5 8.8 575 59 26.9
-10.2592 49.5 6.3 10.2 31.6 8.9 575 58.9 27.3
-10.2391 49.5 6.3 10.2 31.6 8.9 575 58.9 27.8
-10.2191 49.5 6.3 10.2 31.7 8.9 575 58.9 28.2
-10.1991 49.5 6.3 10.2 31.7 9 575 58.9 28.4
-10.179 49.5 6.3 10.2 31.7 9 575 58.8 28.3
-10.159 49.5 6.2 10.2 31.8 8.9 575 58.8 27.8
-10.139 49.5 6.3 10.2 31.8 8.9 575 58.8 27.5
-10.1189 49.5 6.2 10.2 31.8 8.9 575 58.8 27.2
-10.0989 49.5 6.2 10.2 31.8 8.9 575 59 26.8
-10.0789 49.5 6.2 10.2 31.8 8.9 575 59 26.2
-10.0588 49.5 6.2 10.3 31.8 8.9 587 59.1 25.7
-10.0388 49.5 6.2 10.3 31.8 8.9 600 59.2 25.4
-10.0188 49.5 6.2 10.3 31.8 8.8 600 59.5 25.2
-9.9987 49.5 6.2 10.3 31.9 8.8 600 59.8 25.1
-9.9787 49.5 6.2 10.3 31.9 8.8 600 59.7 25.2
-9.9587 49.5 6.2 10.3 31.9 8.8 600 59.7 25.2
-9.9387 49.5 6.2 10.3 31.9 8.8 600 59.6 25.3
-9.9186 49.5 6.2 10.3 31.9 8.8 600 59.6 25.6
-9.8986 49.5 6.2 10.3 31.9 8.8 600 59.6 25.8
-9.8786 49.5 6.2 10.3 31.9 8.7 600 60 26.1
-9.8585 49.5 6.2 10.3 31.8 8.7 600 60.6 26.4
-9.8385 49.5 6.2 10.3 31.8 8.7 600 61.2 26.6
-9.8185 49.5 6.2 10.3 31.8 8.7 600 61.3 27
-9.7984 49.5 6.2 10.3 31.8 8.7 600 61.3 27.7
-9.7784 49.5 6.2 10.3 31.8 8.7 600 61.2 28.1
-9.7584 49.5 6.2 10.3 31.8 8.7 600 60.7 28.1
-9.7383 49.5 6.2 10.3 31.8 8.8 600 59.9 28.2
-9.7183 49.5 6.2 10.3 31.7 8.8 600 59.4 28.1
-9.6983 49.5 6.2 10.3 31.7 8.8 600 59.3 28.2
-9.6782 49.5 6.2 10.3 31.7 8.8 600 59.3 28.2
-9.6582 49.5 6.2 10.3 31.7 8.8 600 59.5 28.2
-9.6382 49.5 6.2 10.3 31.7 8.9 600 59.6 28.1
-9.6182 49.5 6.2 10.3 31.7 8.9 600 59.6 28.1
-9.5981 49.5 6.2 10.3 31.7 8.9 600 59.6 28.1
-9.5781 49.5 6.2 10.3 31.7 8.9 600 59.6 28.2
-9.5581 49.5 6.2 10.3 31.6 8.9 600 59.7 28.4
-9.538 49.5 6.2 10.3 31.6 8.9 600 59.7 28.6
-9.518 49.5 6.2 10.3 31.6 9 600 59.7 28.7
-9.498 49.5 6.2 10.3 31.6 9 600 59.5 29.1
-9.4779 49.5 6.2 10.3 31.5 9 600 59.5 29.4
-9.4579 49.5 6.2 10.3 31.5 9 600 59.5 29.7
-9.4379 49.5 6.2 10.3 31.5 9 600 59.5 29.9
-9.4178 49.5 6.2 10.3 31.5 9 600 59.5 29.9
-9.3978 49.5 6.2 10.3 31.5 9 600 59.6 30
-9.3778 49.5 6.2 10.3 31.4 9 600 59.6 30.7
-9.3577 49.5 6.2 10.3 31.4 9 600 59.6 31.8
-9.3377 49.5 6.2 10.3 31.4 9 600 59.6 32.9
-9.3177 49.5 6.2 10.3 31.4 9 600 60.2 32.8
-9.2977 49.5 6.2 10.3 31.3 9 600 60.8 32.5
-9.2776 49.5 6.2 10.3 31.4 9 600 61 32.1
-9.2576 49.5 6.2 10.3 31.4 9 600 60.3 31.3
-9.2376 49.5 6.2 10.3 31.4 9 600 59.7 30.6
-9.2175 49.5 6.2 10.3 31.4 9 600 59.3 30.1
-9.1975 49.5 6.2 10.3 31.4 9 600 59.2 30
-9.1775 49.5 6.2 10.3 31.4 9 600 59.2 29.9
-9.1574 49.5 6.2 10.3 31.5 9 600 59.6 30
-9.1374 49.5 6.2 10.3 31.5 9 600 60.3 30.2
-9.1174 49.5 6.2 10.3 31.5 9 600 60.8 30.4
-9.0973 49.5 6.2 10.3 31.5 9 600 60.9 30.3
-9.0773 49.5 6.2 10.3 31.5 9 600 60.9 30.2
-9.0573 49.5 6.2 10.3 31.4 9 600 60.8 30
-9.0372 49.5 6.2 10.3 31.4 8.9 600 60.8 29.6
-9.0172 49.5 6.2 10.3 31.4 8.9 600 60.8 29.2
-8.9972 49.5 6.2 10.3 31.2 8.9 600 60.7 28.9
-8.9772 49.5 6.1 10.3 31.2 8.9 600 60.7 28.8
-8.9571 49.5 6.1 10.3 31.1 8.8 600 60.7 28.7
-8.9371 49.5 6.1 10.3 31 8.8 600 60.7 28.7
-8.9171 49.5 6.1 10.3 30.9 8.8 600 60.7 28.8
-8.897 49.5 6.1 10.3 30.9 8.7 600 60.7 28.9
-8.877 49.5 6.1 10.3 30.8 8.7 600 60.7 28.7
-8.857 49.5 6.1 10.3 30.7 8.7 600 60.7 28.5
-8.8369 49.5 6.1 10.3 30.7 8.7 600 60.7 28.5
-8.8169 49.5 6.1 10.3 30.7 8.7 600 60.8 28.6
-8.7969 49.5 6.1 10.3 30.7 8.8 600 60.8 28.8
-8.7768 49.5 6.1 10.3 30.7 8.8 600 60.5 29.1
-8.7568 49.5 6.1 10.3 30.7 8.9 600 59.9 29.7
-8.7368 49.5 6.1 10.3 30.7 8.9 600 59.2 30
-8.7167 49.5 6.1 10.2 30.7 8.9 600 58.9 29.8
-8.6967 49.5 6.1 10.2 30.6 8.9 600 58.9 29.6
-8.6767 49.5 6.1 10.2 30.6 8.9 600 58.9 29.6
-8.6567 49.5 6.1 10.2 30.6 8.9 600 58.9 30.1
-8.6366 49.5 6.1 10.2 30.6 9 600 58.9 30.8
-8.6166 49.5 6.1 10.2 30.6 9 600 58.9 31.5
-8.5966 49.5 6.1 10.2 30.5 9 600 58.9 32.5
-8.5765 49.5 6.1 10.2 30.5 9 600 58.8 33.5
-8.5565 49.5 6.1 10.2 30.5 9 600 59 34.7
-8.5365 49.5 6.1 10.2 30.4 9 600 59.6 37.6
-8.5164 49.5 6.1 10.2 30.4 9 600 60 40.1
-8.4964 49.5 6.1 10.2 30.3 8.9 600 60.2 42.6
-8.4764 49.5 6.1 10.2 30.3 8.9 600 60.1 45.5
-8.4563 49.5 6.1 10.2 30.3 8.9 600 60 48.2
-8.4363 49.5 6.1 10.2 30.3 9 600 60 51.4
-8.4163 49.5 6.1 10.2 30.3 9.2 587 59.9 55.3
-8.3962 49.5 6.1 10.2 30.4 9.3 575 59.9 62.5
-8.3762 49.5 6.1 10.2 30.4 9.4 575 59.9 67.9
-8.3562 49.5 6.1 10.2 30.4 9.5 575 60.2 72.2
-8.3362 49.5 6.1 10.2 30.5 9.5 575 60.3 74.7
-8.3161 49.5 6.1 10.2 30.5 9.6 575 60.4 74.1
-8.2961 49.5 6.1 10.2 30.5 9.7 575 60.4 72.8
-8.2761 49.5 6.1 10.2 30.6 9.8 575 60.3 71.2
-8.256 49.5 6.1 10.2 30.5 9.7 575 60.3 69
-8.236 49.5 6.1 10.2 30.4 9.7 575 60.3 67.4
-8.216 49.5 6.1 10.2 30.4 9.7 575 60.3 66.2
-8.1959 49.5 6.1 10.2 30.3 9.6 575 60.2 63.7
-8.1759 49.5 6.1 10.2 30.3 9.6 575 60.2 61.4
-8.1559 49.5 6.1 10.2 30.3 9.6 575 60.1 59.6
-8.1358 49.5 6.1 10.2 30.3 9.6 576 60 57.9
-8.1158 49.5 6.1 10.2 30.3 9.5 600 59.9 55
-8.0958 49.5 6.1 10.2 30.3 9.5 600 59.8 53.4
-8.0757 49.5 6.1 10.2 30.2 9.5 600 59.6 52.2
-8.0557 49.5 6.1 10.2 30.2 9.5 600 59.3 50.9
-8.0357 49.5 6.1 10.2 30.2 9.4 600 59.1 49.3
-8.0156 49.5 6.1 10.2 30.2 9.4 600 58.9 48.1
-7.9956 49.5 6.1 10.2 30.2 9.4 600 58.5 47.8
-7.9756 49.5 6.1 10.2 30.1 9.4 600 58 48.2
-7.9556 49.5 6.1 10.2 30.1 9.4 600 57.5 48.7
-7.9355 49.5 6.1 10.2 30 9.3 600 59.7 49.9
-7.9155 49.5 6.1 10.2 30 9.3 600 62.7 51.2
-7.8955 49.5 6.1 10.2 29.9 9.3 600 65 52.6
-7.8754 49.5 6.1 10.2 29.8 9.3 600 65 53.2
-7.8554 49.5 6.1 10.2 29.7 9.3 600 64.5 53.4
-7.8354 49.5 6.1 10.2 29.7 9.3 600 64.1 53.6
-7.8153 49.5 6.1 10.2 29.6 9.2 600 63.8 54.2
-7.7953 49.5 6.1 10.2 29.6 9.2 600 63.6 54.9
-7.7753 49.5 6.1 10.2 29.5 9.2 600 63.5 55.5
-7.7552 49.5 6.1 10.2 29.5 9.2 600 63.4 55.9
-7.7352 49.5 6.1 10.2 29.5 9.2 600 63.3 56.3
-7.7152 49.5 6.1 10.2 29.5 9.3 600 63.2 57.1
-7.6951 49.5 6.1 10.2 29.5 9.3 600 63.1 58.3
-7.6751 49.5 6.1 10.2 29.6 9.3 600 63 59.7
-7.6551 49.5 6.1 10.2 29.6 9.4 600 63 60.4
-7.6351 49.5 6.1 10.2 29.7 9.4 600 63 60.8
-7.615 49.5 6.1 10.2 29.7 9.4 600 62.9 61.5
-7.595 49.5 6.1 10.2 29.7 9.5 600 62.9 63.5
-7.575 49.5 6.1 10.2 29.8 9.5 600 62.9 64.4
-7.5549 49.5 6.1 10.2 29.8 9.5 600 62.8 65.5
-7.5349 49.5 6.1 10.2 29.9 9.6 600 62.8 66.9
-7.5149 49.5 6.1 10.2 29.9 9.6 600 62.8 68.6
-7.4948 49.5 6.1 10.2 29.9 9.6 600 62.8 69.8
-7.4748 49.5 6.1 10.2 30 9.7 600 62.8 71.4
-7.4548 49.5 6.1 10.2 30 9.7 600 62.8 73.2
-7.4347 49.5 6.1 10.2 30 9.7 600 62.8 74.4
-7.4147 49.5 6.1 10.2 29.9 9.7 600 62.9 75.4
-7.3947 49.5 6.1 10.2 29.9 9.6 600 62.9 75.6
-7.3746 49.5 6.1 10.2 29.8 9.6 600 62.9 74.1
-7.3546 49.5 6.1 10.2 29.8 9.6 600 63 72.2
-7.3346 49.5 6.1 10.2 29.7 9.5 600 63 70.4
-7.3146 49.5 6.1 10.2 29.6 9.4 600 63.1 69.7
-7.2945 49.5 6.1 10.2 29.5 9.4 600 63.1 69.6
-7.2745 49.5 6.1 10.2 29.5 9.3 600 63.2 69.3
-7.2545 49.5 6.1 10.2 29.4 9.3 600 63.3 67.9
-7.2344 49.5 6 10.2 29.4 9.3 600 63.4 66.4
-7.2144 49.5 6 10.2 29.3 9.2 600 63.5 64.9
-7.1944 49.5 6 10.2 29.3 9.2 600 63.6 63.1
-7.1743 49.5 6 10.2 29.3 9.2 600 63.7 61.4
-7.1543 49.5 6 10.3 29.1 9 600 63.8 59.4
-7.1343 49.5 6 10.3 29 8.9 600 63.9 56.3
-7.1142 49.5 6 10.3 28.8 8.8 600 64.1 53
-7.0942 49.5 6 10.3 28.6 8.6 600 64.3 49.1
-7.0742 49.5 6 10.3 28.5 8.5 600 64.4 45.9
-7.0541 49.5 6 10.4 28.3 8.3 600 64.5 42.6
-7.0341 49.5 6.1 10.4 28.2 8.2 605 64.7 39.7
-7.0141 49.5 6.1 10.4 28 8.1 650 64.8 37
-6.9941 49.5 6.1 10.4 27.8 7.9 650 65.1 34.9
-6.974 49.5 6.1 10.4 27.7 7.8 650 65.2 33.2
-6.954 49.5 6.1 10.4 27.6 7.6 650 65.5 31.7
-6.934 49.5 6.1 10.5 27.5 7.5 650 65.7 30.6
-6.9139 49.5 6.1 10.5 27.4 7.4 650 66 29.8
-6.8939 49.5 6.1 10.5 27.3 7.3 650 65.7 29
-6.8739 49.5 6.1 10.5 27.3 7.3 650 65.8 29.1
-6.8538 49.5 6.1 10.5 27.5 7.4 650 65.9 29.3
-6.8338 49.5 6.1 10.5 27.6 7.5 650 66.3 29.6
-6.8138 49.5 6.1 10.4 27.8 7.6 650 66.5 30.1
-6.7937 49.5 6.1 10.4 27.9 7.7 650 66.7 30.7
-6.7737 49.5 6.1 10.4 28.1 7.8 650 67 31.6
-6.7537 49.5 6.1 10.4 28.2 7.9 635 67.3 32.6
-6.7336 49.5 6.1 10.4 28.3 8 625 67.6 33.5
-6.7136 49.5 6.1 10.4 28.5 8 625 65.3 33.4
-6.6936 49.5 6.1 10.4 28.6 8.1 625 62.1 33
-6.6736 49.5 6.1 10.4 28.7 8.2 625 58.8 32.6
-6.6535 49.5 6 10.4 28.8 8.2 625 59.1 33.3
-6.6335 49.5 6 10.4 28.9 8.3 625 59.4 34
-6.6135 49.5 6 10.4 29 8.3 625 59.7 34.6
-6.5934 49.5 6 10.3 29 8.3 625 59.9 35
-6.5734 49.5 6.1 10.3 29 8.2 625 60.1 35.3
-6.5534 49.5 6.1 10.4 29 8.2 625 60.4 34.9
-6.5333 49.5 6.1 10.4 29 8.2 625 60.7 33.6
-6.5133 49.5 6.1 10.4 29 8.1 625 61.1 32.4
-6.4933 49.5 6.1 10.4 29 8.1 625 60.6 31.1
-6.4732 49.5 6.1 10.4 29 8.1 625 60.8 30.2
-6.4532 49.5 6.1 10.4 29 8 625 60.9 29.3
-6.4332 49.5 6.1 10.4 29 8 625 61.1 28.6
-6.4131 49.5 6.1 10.4 29 7.9 625 61.2 28
-6.3931 49.5 6.1 10.4 29 7.9 625 61.2 27.4
-6.3731 49.5 6.1 10.4 29 7.9 625 61.3 27
-6.3531 49.5 6.1 10.4 29 7.8 625 61.5 26.6
-6.333 49.5 6.1 10.4 29 7.8 625 61.6 26.2
-6.313 49.5 6.1 10.4 28.9 7.7 625 61.8 25.8
-6.293 49.5 6.1 10.4 28.9 7.7 625 61.9 25.3
-6.2729 49.5 6.1 10.4 28.8 7.6 625 61.6 24.9
-6.2529 49.5 6.1 10.4 28.8 7.6 625 61.1 24.3
-6.2329 49.5 6.1 10.4 28.8 7.5 625 60.7 23.9
-6.2128 49.5 6.1 10.4 28.8 7.5 625 60.7 23.3
-6.1928 49.5 6.1 10.4 28.7 7.4 625 60.8 22.7
-6.1728 49.5 6.1 10.4 28.7 7.4 625 60.9 22.2
-6.1527 49.5 6.1 10.4 28.7 7.3 625 61.1 21.8
-6.1327 49.5 6.1 10.4 28.6 7.2 625 61.2 21.4
-6.1127 49.5 6.1 10.4 28.5 7.1 625 61.3 21.1
-6.0926 49.5 6.1 10.4 28.4 7.1 625 61.4 20.9
-6.0726 49.5 6.1 10.4 28.4 7 625 61.2 20.7
-6.0526 49.5 6.1 10.4 28.3 6.9 625 61.1 20.6
-6.0326 49.5 6.1 10.4 28.3 6.9 625 61.1 20.7
-6.0125 49.5 6.1 10.4 28.2 6.9 625 61.2 20.8
-5.9925 49.5 6.1 10.4 28.2 6.9 625 61 20.7
-5.9725 49.5 6.1 10.4 28.2 6.9 625 60.7 20.5
-5.9524 49.5 6.1 10.4 28.2 6.9 625 60.6 20.4
-5.9324 49.5 6.1 10.4 28.1 6.9 622 60.6 20.3
-5.9124 49.5 6.1 10.4 28.1 6.8 600 60.7 20.3
-5.8923 49.5 6.1 10.4 28.1 6.8 600 60.9 20.3
-5.8723 49.5 6.1 10.4 28.1 6.8 600 61.3 20.3
-5.8523 49.5 6.1 10.4 28.1 6.9 600 61.6 20.3
-5.8322 49.5 6.1 10.4 28.1 6.9 600 61.7 20.3
-5.8122 49.5 6.1 10.4 28.1 6.9 600 61.8 20.3
-5.7922 49.5 6.1 10.4 28.1 6.9 600 61.8 20.3
-5.7721 49.5 6.1 10.4 28.1 6.9 600 61.6 20.1
-5.7521 49.5 6.1 10.4 28 6.9 600 61.3 20
-5.7321 49.5 6.1 10.4 27.9 6.8 600 61.3 19.9
-5.7121 49.5 6.1 10.4 27.8 6.8 600 61.4 19.7
-5.692 49.5 6.1 10.4 27.8 6.7 600 61.5 19.6
-5.672 49.5 6.1 10.4 27.7 6.7 600 61.7 19.4
-5.652 49.5 6.1 10.4 27.6 6.7 600 62.1 19.3
-5.6319 49.5 6.1 10.4 27.6 6.6 600 62.3 19.3
-5.6119 49.5 6.1 10.4 27.5 6.6 600 62.3 19.2
-5.5919 49.5 6.1 10.4 27.5 6.6 600 62.1 19.1
-5.5718 49.5 6.1 10.4 27.5 6.6 600 62.1 19.1
-5.5518 49.5 6.1 10.4 27.4 6.6 600 62.1 19.1
-5.5318 49.5 6.1 10.4 27.4 6.6 600 62.1 19.1
-5.5117 49.5 6.1 10.4 27.4 6.7 600 61.8 19.1
-5.4917 49.5 6.1 10.4 27.3 6.6 600 61.8 19.1
-5.4717 49.5 6.1 10.4 27.3 6.6 600 61.9 19.1
-5.4516 49.5 6.1 10.4 27.3 6.6 600 61.9 19.2
-5.4316 49.5 6.1 10.4 27.3 6.6 600 62 19.1
-5.4116 49.5 6.1 10.4 27.2 6.6 600 62 19
-5.3915 49.5 6.1 10.4 27.2 6.5 596 62 18.8
-5.3715 49.5 6.1 10.4 27.2 6.5 575 61.8 18.7
-5.3515 49.5 6.1 10.4 27.2 6.5 575 61.6 18.6
-5.3315 49.5 6.1 10.4 27.1 6.5 575 61.5 18.4
-5.3114 49.5 6.1 10.4 27.1 6.5 575 61.5 18.4
-5.2914 49.5 6.1 10.4 27 6.4 575 61.5 18.2
-5.2714 49.5 6.1 10.4 27 6.4 575 61.6 18.1
-5.2513 49.5 6.1 10.4 27 6.4 575 61.7 17.9
-5.2313 49.5 6.1 10.4 26.9 6.4 575 61.8 17.8
-5.2113 49.5 6.1 10.4 26.9 6.3 575 62.1 17.7
-5.1912 49.5 6.1 10.4 26.7 6.2 575 62.2 17.6
-5.1712 49.5 6.1 10.4 26.7 6.2 575 62.3 17.5
-5.1512 49.5 6.1 10.4 26.6 6.1 575 62.6 17.3
-5.1311 49.5 6.1 10.4 26.5 6.1 575 62.9 17.1
-5.1111 49.5 6.1 10.4 26.5 6 575 63.1 16.9
-5.0911 49.5 6.1 10.4 26.4 6 557 63.1 16.7
-5.071 49.5 6.1 10.4 26.3 5.9 550 63.2 16.6
-5.051 49.5 6.1 10.4 26.3 5.9 550 63.3 16.5
-5.031 49.5 6.1 10.4 26.2 5.9 550 63.4 16.4
-5.011 49.5 6.1 10.4 26.1 5.8 550 63.5 16.3
-4.9909 49.5 6.1 10.4 26.1 5.8 550 63.8 16.3
-4.9709 49.5 6.1 10.3 26 5.8 550 64.2 16.2
-4.9509 49.5 6.1 10.3 25.9 5.8 550 64.8 16.2
-4.9308 49.5 6.1 10.3 25.9 5.7 550 64.9 16.2
-4.9108 49.5 6.2 10.3 25.8 5.7 550 65 16.2
-4.8908 49.5 6.2 10.3 25.7 5.7 550 65.1 16.2
-4.8707 49.5 6.1 10.3 25.6 5.7 549 65.1 16.1
-4.8507 49.5 6.2 10.3 25.6 5.7 527 65.1 16
-4.8307 49.5 6.2 10.3 25.5 5.7 527 65.2 15.9
-4.8106 49.5 6.2 10.3 25.4 5.7 525 65.2 15.9
-4.7906 49.5 6.2 10.3 25.3 5.6 525 65.3 15.9
-4.7706 49.5 6.2 10.3 25.2 5.6 525 65.4 16
-4.7505 49.5 6.2 10.3 25.1 5.5 525 65.5 16
-4.7305 49.5 6.2 10.3 25.1 5.5 525 65.6 16.1
-4.7105 49.5 6.2 10.3 25 5.4 525 65.6 16.2
-4.6905 49.5 6.2 10.3 24.9 5.4 525 65.7 16.4
-4.6704 49.5 6.2 10.3 24.8 5.4 525 65.9 16.6
-4.6504 49.5 6.2 10.3 24.6 5.4 525 66 16.8
-4.6304 49.5 6.2 10.3 24.5 5.4 525 66.1 17.1
-4.6103 49.5 6.2 10.3 24.4 5.4 525 66.2 17.5
-4.5903 49.5 6.2 10.3 24.3 5.4 525 66.3 17.7
-4.5703 49.5 6.2 10.3 24.3 5.5 525 66.5 17.7
-4.5502 49.5 6.2 10.3 24.2 5.5 523 66.5 17.8
-4.5302 49.5 6.2 10.3 24.1 5.5 506 66.6 18.1
-4.5102 49.5 6.2 10.3 24 5.4 500 66.7 18.3
-4.4901 49.5 6.2 10.3 23.9 5.4 500 66.4 18.4
-4.4701 49.5 6.2 10.3 23.9 5.4 500 66 18.7
-4.4501 49.5 6.2 10.3 23.8 5.4 500 65.8 18.8
-4.43 49.5 6.2 10.3 23.7 5.4 500 65.8 19
-4.41 49.5 6.2 10.3 23.6 5.4 500 65.9 19.2
-4.39 49.5 6.2 10.3 23.6 5.4 500 65.9 19.5
-4.37 49.5 6.2 10.2 23.6 5.5 500 66 19.9
-4.3499 49.5 6.2 10.2 23.6 5.5 500 66 20.2
-4.3299 49.5 6.2 10.2 23.6 5.6 500 66.1 20.6
-4.3099 49.5 6.2 10.2 23.6 5.7 500 66.1 21.1
-4.2898 49.5 6.2 10.1 23.5 5.7 500 66.2 21.4
-4.2698 49.5 6.2 10.1 23.5 5.7 489 66.2 21.9
-4.2498 49.5 6.2 10.1 23.5 5.7 447 66.4 22.4
-4.2297 49.5 6.2 10.1 23.4 5.8 450 66.5 22.8
-4.2097 49.5 6.2 10.1 23.4 5.8 450 66.9 23.4
-4.1897 49.5 6.3 10.1 23.3 5.8 450 67.3 23.9
-4.1696 49.5 6.3 10.1 23.3 5.8 450 67.6 24.3
-4.1496 49.5 6.3 10.1 23.2 5.8 450 67.7 24.6
-4.1296 49.5 6.3 10.1 23.2 5.8 450 67.7 24.9
-4.1095 49.5 6.3 10 23.2 5.8 450 67.7 25.1
-4.0895 49.5 6.3 10 23.2 5.8 450 67.7 25.2
-4.0695 49.5 6.3 10 23.2 5.9 450 67.7 25.2
-4.0495 49.5 6.3 10 23.2 5.9 450 67.7 25
-4.0294 49.5 6.3 9.9 23.2 5.9 450 67.7 24.7
-4.0094 49.5 6.3 9.9 23.3 5.9 450 67.6 24.6
-3.9894 49.5 6.3 9.9 23.3 5.9 376 67.6 24.5
-3.9693 49.5 6.3 9.8 23.3 5.8 350 67.6 24.4
-3.9493 49.5 6.3 9.8 23.3 5.8 350 67.5 24.4
-3.9293 49.5 6.4 9.8 23.3 5.8 350 67.5 24.3
-3.9092 49.5 6.4 9.8 23.3 5.8 350 67.5 24.2
-3.8892 49.5 6.4 9.7 23.4 5.8 350 67.7 24.3
-3.8692 49.5 6.4 9.7 23.4 5.8 350 67.8 24.4
-3.8491 49.5 6.4 9.7 23.4 5.8 350 67.8 24.4
-3.8291 49.5 6.4 9.6 23.3 5.7 350 68 24.4
-3.8091 49.5 6.4 9.6 23.3 5.6 350 68.6 24.6
-3.789 49.5 6.4 9.6 23.2 5.6 350 69.1 24.7
-3.769 49.5 6.4 9.6 23.1 5.5 350 69.3 24.7
-3.749 49.5 6.4 9.6 23.1 5.5 350 69.3 24.6
-3.729 49.5 6.4 9.6 23.1 5.5 350 69.2 24.5
-3.7089 49.5 6.4 9.5 23.1 5.5 330 69.2 24.2
-3.6889 49.5 6.4 9.5 23.1 5.5 275 69.1 24
-3.6689 49.5 6.5 9.5 23.1 5.4 275 69 23.7
-3.6488 49.5 6.5 9.5 23 5.4 275 68.9 23.4
-3.6288 49.5 6.5 9.4 23 5.4 275 68.9 23.1
-3.6088 49.5 6.5 9.4 23 5.4 275 68.9 22.8
-3.5887 49.5 6.5 9.4 23 5.4 275 68.9 22.6
-3.5687 49.5 6.5 9.4 23 5.4 275 68.7 22.3
-3.5487 49.5 6.5 9.4 23 5.4 275 68.6 22.3
-3.5286 49.5 6.5 9.4 23 5.4 275 68.5 22.2
-3.5086 49.5 6.5 9.3 22.9 5.4 275 68.4 22.2
-3.4886 49.5 6.5 9.3 22.9 5.4 275 68.2 22.1
-3.4685 49.5 6.5 9.3 22.8 5.4 275 68.1 22.1
-3.4485 49.5 6.5 9.3 22.8 5.3 275 67.8 22
-3.4285 49.5 6.5 9.3 22.7 5.3 275 67.3 22
-3.4085 49.5 6.5 9.3 22.7 5.3 275 66.8 22
-3.3884 49.5 6.5 9.3 22.6 5.3 275 68.6 22.5
-3.3684 49.5 6.5 9.3 22.5 5.3 275 71.9 23.3
-3.3484 49.5 6.5 9.3 22.5 5.3 275 73.4 23.7
-3.3283 49.5 6.5 9.3 22.4 5.3 275 72.5 23.6
-3.3083 49.5 6.5 9.3 22.4 5.2 275 72.5 23.6
-3.2883 49.5 6.5 9.3 22.3 5.2 275 75.1 24.2
-3.2682 49.5 6.5 9.3 22.3 5.2 275 75.6 24.4
-3.2482 49.5 6.5 9.3 22.3 5.2 275 75.4 24.3
-3.2282 49.5 6.5 9.4 22.2 5.2 275 74.9 24.3
-3.2081 49.5 6.5 9.4 22 5.2 275 74.9 24.1
-3.1881 49.5 6.5 9.4 21.9 5.1 275 74.8 23.9
-3.1681 49.5 6.5 9.4 21.7 5.1 295 74.7 23.8
-3.148 49.5 6.5 9.5 21.6 5 350 74.8 23.8
-3.128 49.5 6.5 9.5 21.4 5 350 74.8 23.7
-3.108 49.5 6.5 9.5 21.3 4.9 350 74.9 23.7
-3.0879 49.5 6.5 9.6 21.2 4.9 350 74.9 23.8
-3.0679 49.5 6.5 9.6 21 4.9 350 75 23.9
-3.0479 49.5 6.5 9.6 20.9 4.8 350 75 24.1
-3.0279 49.5 6.5 9.6 20.8 4.8 350 75.1 24.3
-3.0078 49.5 6.5 9.6 20.7 4.7 350 75.2 24.7
-2.9878 49.5 6.5 9.6 20.6 4.8 350 75.3 25.1
-2.9678 49.5 6.5 9.6 20.6 4.8 350 75.4 25.7
-2.9477 49.5 6.5 9.6 20.6 4.8 350 75.4 26.2
-2.9277 49.5 6.5 9.6 20.6 4.9 350 75.5 26.9
-2.9077 49.5 6.5 9.6 20.6 4.9 350 75.6 27.6
-2.8876 49.5 6.5 9.6 20.6 5 310 75.8 28.3
-2.8676 49.5 6.5 9.6 20.6 5 300 76 29.2
-2.8476 49.5 6.5 9.5 20.6 5.1 300 76.2 30.2
-2.8275 49.5 6.5 9.5 20.6 5.1 300 76.8 31.2
-2.8075 49.5 6.5 9.5 20.6 5.2 300 77.3 32.1
-2.7875 49.5 6.5 9.5 20.6 5.2 300 77.6 33.1
-2.7674 49.5 6.5 9.5 20.6 5.2 300 78.2 33.4
-2.7474 49.5 6.5 9.5 20.6 5.3 300 80.4 34.4
-2.7274 49.5 6.5 9.5 20.6 5.3 300 78.9 33.9
-2.7074 49.5 6.5 9.5 20.6 5.3 300 71.7 31.1
-2.6873 49.5 6.5 9.4 20.6 5.3 300 62.7 27.4
-2.6673 49.5 6.5 9.4 20.6 5.3 300 61 26.2
-2.6473 49.5 6.5 9.4 20.6 5.3 300 65.3 26.9
-2.6272 49.5 6.5 9.4 20.6 5.3 300 69.2 27.6
-2.6072 49.5 6.5 9.4 20.6 5.2 300 69.8 27.4
-2.5872 49.5 6.5 9.4 20.6 5.2 300 69.9 27.2
-2.5671 49.5 6.5 9.4 20.6 5.2 300 70.3 27
-2.5471 49.5 6.5 9.4 20.6 5.2 300 70.7 26.9
-2.5271 49.5 6.5 9.4 20.6 5.2 300 70.8 26.8
-2.507 49.5 6.5 9.4 20.6 5.2 300 69.9 26.3
-2.487 49.5 6.5 9.4 20.6 5.2 300 66 25.4
-2.467 49.5 6.5 9.4 20.6 5.2 300 63.9 24.8
-2.4469 49.5 6.5 9.4 20.7 5.2 300 65.3 25.3
-2.4269 49.5 6.5 9.4 20.7 5.3 300 68.9 26.4
-2.4069 49.5 6.5 9.4 20.7 5.3 300 67.6 26.4
-2.3869 49.5 6.5 9.4 20.8 5.3 300 63.2 25.3
-2.3668 49.5 6.5 9.4 20.8 5.3 300 62.5 25.3
-2.3468 49.5 6.5 9.3 20.9 5.4 300 72.7 28.8
-2.3268 49.5 6.5 9.3 20.9 5.4 279 83.8 33.3
-2.3067 49.5 6.5 9.3 20.9 5.4 275 85.5 34.5
-2.2867 49.5 6.5 9.3 21 5.4 275 83.8 34.6
-2.2667 49.5 6.5 9.3 21 5.5 275 83.1 34.6
-2.2466 49.5 6.5 9.2 21 5.5 275 84.5 35.2
-2.2266 49.5 6.5 9.2 21.1 5.5 275 85.2 35.4
-2.2066 49.5 6.5 9.2 21.1 5.5 275 79 33
-2.1865 49.5 6.5 9.2 21.1 5.5 275 70.1 29.5
-2.1665 49.5 6.5 9.2 21 5.5 275 61.7 26
-2.1465 49.5 6.5 9.2 21 5.5 275 62.6 26
-2.1264 49.5 6.5 9.2 20.9 5.4 275 65.1 26.6
-2.1064 49.5 6.5 9.2 20.9 5.4 275 66.7 26.9
-2.0864 49.5 6.5 9.2 20.9 5.4 275 67.6 26.9
-2.0664 49.5 6.5 9.2 20.8 5.4 283 68.3 26.8
-2.0463 49.5 6.5 9.2 20.8 5.3 300 68.7 26.6
-2.0263 49.5 6.5 9.2 20.7 5.3 300 68.9 26.4
-2.0063 49.5 6.5 9.2 20.7 5.3 300 69 26.1
-1.9862 49.5 6.5 9.2 20.6 5.2 300 68.7 25.8
-1.9662 49.5 6.5 9.2 20.6 5.2 300 68.4 25.6
-1.9462 49.5 6.5 9.2 20.5 5.2 300 69.4 25.8
-1.9261 49.5 6.5 9.2 20.5 5.2 300 73 26.7
-1.9061 49.5 6.5 9.1 20.5 5.2 300 76.6 27.7
-1.8861 49.5 6.5 9.1 20.5 5.3 300 77.2 28.2
-1.866 49.5 6.5 9.1 20.5 5.3 300 76.3 28.6
-1.846 49.5 6.5 9.1 20.5 5.3 300 75.6 28.9
-1.826 49.5 6.5 9.1 20.5 5.3 300 75.2 29.3
-1.8059 49.5 6.5 9.1 20.5 5.3 300 74.9 29.6
-1.7859 49.5 6.5 9.1 20.5 5.4 321 74.6 30
-1.7659 49.5 6.5 9.1 20.5 5.4 325 74.5 30.6
-1.7459 49.5 6.5 9.1 20.5 5.4 325 74.4 31
-1.7258 49.5 6.5 9.1 20.5 5.4 325 74.2 31.3
-1.7058 49.5 6.5 9.1 20.5 5.5 325 74.2 31.6
-1.6858 49.5 6.5 9.1 20.5 5.5 325 74.1 31.8
-1.6657 49.5 6.5 9.1 20.5 5.5 325 74.1 31.9
-1.6457 49.5 6.5 9.1 20.5 5.4 325 74 32
-1.6257 49.5 6.5 9.1 20.5 5.5 325 74 32
-1.6056 49.5 6.5 9.1 20.5 5.5 325 74 32.2
-1.5856 49.5 6.5 9.1 20.6 5.5 325 73.9 32.4
-1.5656 49.5 6.5 9.1 20.6 5.5 325 73.9 32.4
-1.5455 49.5 6.5 9.1 20.6 5.5 325 73.8 32.1
-1.5255 49.5 6.5 9.1 20.7 5.5 325 73.8 31.9
-1.5055 49.5 6.5 9.1 20.7 5.5 334 73.7 31.7
-1.4854 49.5 6.5 9.1 20.7 5.5 350 73.7 31.4
-1.4654 49.5 6.5 9.1 20.7 5.5 350 73.6 31.2
-1.4454 49.5 6.5 9.1 20.8 5.5 350 73.6 31
-1.4254 49.5 6.5 9.2 20.8 5.5 350 73.5 30.9
-1.4053 49.5 6.5 9.2 20.8 5.5 350 73.4 30.7
-1.3853 49.5 6.5 9.2 20.8 5.5 350 73.4 30.6
-1.3653 49.5 6.5 9.2 20.8 5.5 350 73.3 30.6
-1.3452 49.5 6.4 9.2 20.9 5.5 350 73.3 30.6
-1.3252 49.5 6.5 9.2 21 5.5 350 73.2 30.7
-1.3052 49.5 6.4 9.3 21 5.5 350 73.2 30.8
-1.2851 49.5 6.4 9.3 21.1 5.6 350 73.1 30.9
-1.2651 49.5 6.4 9.3 21.1 5.6 350 73.1 31
-1.2451 49.5 6.4 9.3 21.2 5.6 350 73.1 31
-1.225 49.5 6.4 9.3 21.3 5.6 394 73.1 30.9
-1.205 49.5 6.4 9.3 21.3 5.7 400 73.1 30.7
-1.185 49.5 6.4 9.3 21.4 5.7 400 73.2 30.6
-1.1649 49.5 6.4 9.4 21.5 5.7 400 73.3 30.4
-1.1449 49.5 6.4 9.4 21.7 5.7 400 73.5 30.2
-1.1249 49.5 6.4 9.4 21.8 5.7 400 73.9 29.9
-1.1049 49.5 6.4 9.4 21.9 5.7 400 74.3 29.7
-1.0848 49.5 6.4 9.4 22 5.8 400 72.9 29
-1.0648 49.5 6.4 9.5 22.1 5.8 400 69.2 27.7
-1.0448 49.5 6.4 9.5 22.2 5.8 400 69.3 27.5
-1.0247 49.5 6.4 9.5 22.3 5.8 400 69.3 27.3
-1.0047 49.5 6.4 9.6 22.5 5.8 400 67.8 26.6
-0.9847 49.5 6.4 9.6 22.6 5.8 400 66 25.6
-0.9646 49.5 6.4 9.6 22.7 5.8 436 65.4 25
-0.9446 49.5 6.4 9.6 22.8 5.8 500 65.8 24.7
-0.9246 49.5 6.4 9.7 23 5.9 500 66 24.2
-0.9045 49.5 6.4 9.7 23.1 5.9 500 66.1 23.9
-0.8845 49.5 6.4 9.6 23.2 5.9 500 66.1 23.6
-0.8645 49.5 6.4 9.6 23.4 6 500 66.1 23.2
-0.8444 49.5 6.4 9.6 23.6 6 500 66 22.9
-0.8244 49.5 6.4 9.6 23.7 6 500 65.9 22.8
-0.8044 49.5 6.4 9.6 23.8 6.1 484 65.8 22.6
-0.7844 49.5 6.4 9.6 24 6.1 477 65.6 22.4
-0.7643 49.5 6.4 9.6 24.1 6.1 477 65.5 22.3
-0.7443 49.5 6.4 9.6 24.2 6.1 477 65.3 22.3
-0.7243 49.5 6.4 9.6 24.3 6.2 475 65.1 22.2
-0.7042 49.5 6.4 9.6 24.4 6.2 475 64.9 22.1
-0.6842 49.5 6.4 9.6 24.5 6.2 475 64.8 21.9
-0.6642 49.5 6.4 9.6 24.6 6.2 521 64.6 21.8
-0.6441 49.5 6.4 9.6 24.6 6.3 525 64.4 21.8
-0.6241 49.5 6.4 9.6 24.7 6.3 525 64.2 21.7
-0.6041 49.5 6.4 9.7 24.8 6.3 525 64 21.6
-0.584 49.5 6.4 9.7 24.9 6.3 525 63.8 21.5
-0.564 49.5 6.4 9.7 25 6.4 525 63.2 21.2
-0.544 49.5 6.4 9.7 25 6.4 525 63.2 21.2
-0.5239 49.5 6.4 9.7 25.1 6.4 525 63.6 21.2
-0.5039 49.5 6.4 9.7 25.1 6.4 525 64.2 21.3
-0.4839 49.5 6.4 9.7 25.2 6.4 525 64.3 21.4
-0.4638 49.5 6.4 9.8 25.2 6.4 525 64.6 21.5
-0.4438 49.5 6.4 9.8 25.2 6.4 525 64.8 21.5
-0.4238 49.5 6.4 9.8 25.3 6.4 525 64.8 21.3
-0.4038 49.5 6.4 9.8 25.3 6.4 535 64.9 20.9
-0.3837 49.5 6.4 9.8 25.4 6.4 550 65 20.8
-0.3637 49.5 6.4 9.8 25.4 6.4 550 65 20.6
-0.3437 49.5 6.4 9.8 25.5 6.5 550 65.1 20.5
-0.3236 49.5 6.4 9.8 25.6 6.5 550 65.1 20.4
-0.3036 49.5 6.4 9.8 25.7 6.5 550 65.1 20.2
-0.2836 49.5 6.4 9.8 25.7 6.5 550 65.1 20.1
-0.2635 49.5 6.4 9.8 25.8 6.5 550 65.1 20
-0.2435 49.5 6.4 9.8 25.9 6.6 550 65.1 19.9
-0.2235 49.5 6.4 9.7 25.9 6.6 550 65.1 19.8
-0.2034 49.5 6.4 9.7 26 6.6 550 65.1 19.7
-0.1834 49.5 6.4 9.7 26.1 6.7 550 65.1 19.7
-0.1634 49.5 6.4 9.7 26.1 6.7 550 65.1 19.6
-0.1433 49.5 6.4 9.7 26.1 6.7 550 65 19.5
-0.1233 49.5 6.4 9.7 26.1 6.7 550 65 19.4
-0.1033 49.5 6.4 9.7 26.2 6.7 574 65 19.4
-0.0833 49.5 6.4 9.7 26.2 6.7 575 65 19.5
-0.0632 49.5 6.4 9.7 26.2 6.7 575 65 19.4
-0.0432 49.5 6.4 9.7 26.2 6.6 575 64.9 19.4
-0.0232 49.5 6.4 9.7 26.2 6.6 575 64.9 19.4
-0.0031 49.5 6.4 9.7 26.3 6.6 575 64.9 19.4
0.0169 49.5 6.4 9.7 26.3 6.6 575 64.8 19.4
0.0369 49.5 6.4 9.7 26.3 6.6 575 64.8 19.4
0.057 49.5 6.4 9.7 26.4 6.6 575 64.8 19.5
0.077 49.5 6.4 9.7 26.4 6.6 575 64.8 19.6
0.097 49.5 6.4 9.8 26.4 6.6 575 64.7 19.7
0.1171 49.5 6.5 9.9 26.5 6.7 575 64.7 19.6
0.1371 49.5 6.5 10 26.5 6.7 575 64.6 19.4
0.1571 49.5 6.5 10 26.6 6.7 575 64.6 19.3
0.1772 49.5 6.5 10.1 26.6 6.7 575 64.6 19.4
0.1972 49.5 6.5 10.2 26.7 6.8 575 64.6 19.5
0.2172 49.5 6.5 10.2 26.7 6.8 575 64.5 19.6
0.2372 49.5 6.5 10.3 26.8 6.8 575 64.5 19.6
0.2573 49.5 6.6 10.4 26.8 6.9 575 64.5 19.7
0.2773 49.5 6.6 10.4 26.8 6.9 575 64.4 19.8
0.2973 49.5 6.6 10.5 26.9 6.9 575 64.4 19.9
0.3174 49.5 6.6 10.5 26.9 6.9 575 64.3 20
0.3374 49.5 6.6 10.4 27 6.9 575 64.3 20.2
0.3574 49.5 6.6 10.4 27 6.9 575 64.3 20.2
0.3775 49.5 6.6 10.3 27 6.9 575 64.3 20.3
0.3975 49.5 6.5 10.2 27.1 6.9 575 64.2 20.2
0.4175 49.5 6.5 10.2 27.1 6.9 575 64.2 20.1
0.4376 49.5 6.5 10.1 27.1 6.9 599 64.2 19.9
0.4576 49.5 6.5 10 27.1 6.9 600 64.2 19.8
0.4776 49.5 6.5 10 27.2 7 600 64.1 19.9
0.4977 49.5 6.5 9.9 27.2 7 600 64.1 20.1
0.5177 49.5 6.5 9.8 27.2 7 600 64.1 20.1
0.5377 49.5 6.5 9.8 27.3 7 600 64 19.7
0.5577 49.5 6.4 9.7 27.3 7 600 64 19.5
0.5778 49.5 6.4 9.7 27.3 7 600 64 19.6
0.5978 49.5 6.4 9.7 27.4 7 600 64 19.6
0.6178 49.5 6.4 9.7 27.4 7 600 63.9 19.7
0.6379 49.5 6.4 9.7 27.4 7.1 600 63.9 19.9
0.6579 49.5 6.4 9.6 27.5 7.1 600 63.9 20.1
0.6779 49.5 6.4 9.6 27.5 7.1 600 63.9 20.1
0.698 49.5 6.4 9.6 27.6 7.1 600 63.9 20
0.718 49.5 6.4 9.6 27.6 7.2 600 63.9 20
0.738 49.5 6.4 9.6 27.6 7.2 600 63.8 20
0.7581 49.5 6.4 9.6 27.7 7.2 600 63.8 20.1
0.7781 49.5 6.4 9.6 27.7 7.2 600 63.8 20.2
0.7981 49.5 6.4 9.6 27.8 7.3 600 63.8 20.2
0.8182 49.5 6.4 9.6 27.8 7.3 600 63.8 20.2
0.8382 49.5 6.4 9.6 27.8 7.3 600 63.8 20.3
0.8582 49.5 6.4 9.6 27.8 7.4 600 63.8 20.4
0.8782 49.5 6.4 9.6 27.9 7.4 600 63.7 20.5
0.8983 49.5 6.4 9.6 27.9 7.4 600 63.7 20.8
0.9183 49.5 6.4 9.6 27.9 7.4 600 63.7 21.1
0.9383 49.5 6.4 9.6 27.9 7.5 600 63.7 21.1
0.9584 49.5 6.5 9.6 27.9 7.5 600 63.7 21
0.9784 49.5 6.5 9.6 27.9 7.5 600 63.7 20.9
0.9984 49.5 6.5 9.6 27.9 7.5 600 63.7 21
1.0185 49.5 6.5 9.6 27.9 7.6 600 63.6 21.5
1.0385 49.5 6.5 9.6 27.9 7.6 600 63.6 21.6
1.0585 49.5 6.4 9.6 28 7.6 600 63.6 21.6
1.0786 49.5 6.4 9.6 27.9 7.6 600 63.6 21.7
1.0986 49.5 6.5 9.6 27.9 7.5 600 63.6 21.9
1.1186 49.5 6.5 9.6 27.8 7.5 600 63.6 22.2
1.1387 49.5 6.5 9.6 27.9 7.5 600 63.5 22.6
1.1587 49.5 6.5 9.6 27.9 7.5 600 63.5 22.8
1.1787 49.5 6.5 9.6 27.9 7.5 600 63.5 23
1.1987 49.5 6.5 9.6 28 7.6 600 63.5 23.3
1.2188 49.5 6.5 9.6 28 7.6 600 63.5 23.6
1.2388 49.5 6.5 9.5 28.1 7.6 600 63.4 23.8
1.2588 49.5 6.5 9.5 28.1 7.7 600 63.4 23.9
1.2789 49.5 6.5 9.5 28.2 7.7 600 63.4 24.1
1.2989 49.5 6.5 9.5 28.3 7.8 600 63.4 24.4
1.3189 49.5 6.5 9.5 28.3 7.8 600 63.4 24.7
1.339 49.5 6.5 9.5 28.3 7.8 600 63.4 24.8
1.359 49.5 6.5 9.5 28.3 7.7 600 63.4 24.7
1.379 49.5 6.5 9.5 28.3 7.7 600 63.4 24.6
1.3991 49.5 6.5 9.5 28.3 7.7 600 63.4 24.4
1.4191 49.5 6.5 9.5 28.3 7.7 600 63.4 24.2
1.4391 49.5 6.5 9.5 28.3 7.6 600 63.3 24.1
1.4592 49.5 6.5 9.5 28.3 7.5 600 63.3 24.2
1.4792 49.5 6.5 9.5 28.3 7.5 600 63.3 24.4
1.4992 49.5 6.5 9.5 28.3 7.4 600 63.3 23.9
1.5192 49.5 6.5 9.5 28.3 7.3 600 63.3 22.8
1.5393 49.5 6.5 9.5 28.3 7.3 625 63.3 22
1.5593 49.5 6.5 9.5 28.3 7.2 625 63.3 21.3
1.5793 49.5 6.5 9.5 28.3 7.2 625 63.3 20.9
1.5994 49.5 6.5 9.5 28.3 7.3 625 63.3 20.4
1.6194 49.5 6.5 9.5 28.4 7.3 625 63.3 20.1
1.6394 49.5 6.5 9.5 28.4 7.3 625 63.3 19.8
1.6595 49.5 6.5 9.5 28.4 7.3 621 63.2 19.6
1.6795 49.5 6.5 9.5 28.5 7.3 602 63.2 19.7
1.6995 49.5 6.5 9.4 28.6 7.4 602 63.2 19.8
1.7196 49.5 6.5 9.4 28.7 7.5 600 63.2 20.2
1.7396 49.5 6.5 9.4 28.8 7.7 600 63.1 20.9
1.7596 49.5 6.5 9.3 28.9 7.8 600 63.1 21.5
1.7797 49.5 6.5 9.3 29.1 7.9 600 63.1 22.2
1.7997 49.5 6.5 9.3 29.2 8 600 63 23
1.8197 49.5 6.5 9.3 29.3 8.1 560 63 23.5
1.8397 49.5 6.5 9.2 29.3 8.2 525 62.9 24
1.8598 49.5 6.5 9.2 29.4 8.3 525 62.9 24.7
1.8798 49.5 6.5 9.2 29.4 8.3 525 62.9 25.5
1.8998 49.5 6.5 9.2 29.5 8.4 525 62.8 26.1
1.9199 49.5 6.5 9.2 29.5 8.4 525 62.8 26.5
1.9399 49.5 6.5 9.2 29.6 8.5 525 62.8 27
1.9599 49.5 6.6 9.1 29.6 8.6 525 62.7 27.7
1.98 49.5 6.6 9.1 29.7 8.6 525 62.7 28.2
2 49.5 6.6 9.1 29.7 8.6 525 62.7 28.6
-10.8 49.52 6.3 10.1 30.1 7.5 550 58.7 18.6
-10.78 49.52 6.3 10.1 30.1 7.5 550 58.8 19
-10.7599 49.52 6.3 10.1 30.2 7.5 550 58.9 19.7
-10.7399 49.52 6.3 10.1 30.3 7.6 550 58.9 20.1
-10.7199 49.52 6.3 10.1 30.4 7.7 550 58.9 20.4
-10.6998 49.52 6.3 10.1 30.5 7.8 550 59 20.5
-10.6798 49.52 6.3 10.1 30.6 7.9 550 59.1 20.8
-10.6598 49.52 6.3 10.1 30.7 8 541 59.1 21.2
-10.6397 49.52 6.3 10.1 30.8 8.1 527 58.9 21.7
-10.6197 49.52 6.3 10.1 30.9 8.2 538 58.7 22.1
-10.5997 49.52 6.3 10.1 31 8.3 550 58.8 22.7
-10.5797 49.52 6.3 10.1 31.1 8.3 550 59 23
-10.5596 49.52 6.3 10.1 31.1 8.3 550 59.1 23.3
-10.5396 49.52 6.3 10.1 31.1 8.4 550 59.1 23.5
-10.5196 49.52 6.3 10.1 31.1 8.4 550 59.1 23.7
-10.4995 49.52 6.3 10.1 31.2 8.4 550 59.1 24
-10.4795 49.52 6.3 10.1 31.2 8.4 550 59.1 24.5
-10.4595 49.52 6.3 10.1 31.3 8.5 550 59.1 25
-10.4394 49.52 6.3 10.1 31.3 8.6 550 59 25.3
-10.4194 49.52 6.3 10.1 31.4 8.6 550 59 25.4
-10.3994 49.52 6.3 10.1 31.4 8.7 550 59 25.4
-10.3793 49.52 6.3 10.1 31.5 8.7 550 59 25.7
-10.3593 49.52 6.3 10.1 31.5 8.8 550 59 26.1
-10.3393 49.52 6.3 10.2 31.6 8.8 574 58.9 26.5
-10.3192 49.52 6.3 10.2 31.6 8.9 575 58.9 27.1
-10.2992 49.52 6.3 10.2 31.6 8.9 575 58.9 27.7
-10.2792 49.52 6.3 10.2 31.7 9 575 58.9 28.3
-10.2592 49.52 6.3 10.2 31.7 9 575 58.9 28.6
-10.2391 49.52 6.3 10.2 31.8 9 575 58.8 29
-10.2191 49.52 6.3 10.2 31.8 9.1 575 58.8 29.4
-10.1991 49.52 6.3 10.2 31.9 9.1 575 58.8 29.6
-10.179 49.52 6.3 10.2 31.9 9.1 575 58.8 29.8
-10.159 49.52 6.2 10.2 31.9 9.1 575 58.8 29.4
-10.139 49.52 6.2 10.2 31.9 9.1 575 58.7 28.7
-10.1189 49.52 6.2 10.2 31.9 9.1 575 58.7 28.2
-10.0989 49.52 6.2 10.2 31.9 9 575 59 27.9
-10.0789 49.52 6.2 10.2 32 9 577 59.3 27.5
-10.0588 49.52 6.2 10.3 32 9 587 59.6 27.1
-10.0388 49.52 6.2 10.3 32 9 600 59.6 26.7
-10.0188 49.52 6.2 10.3 32 9 600 59.6 26.5
-9.9987 49.52 6.2 10.3 32 9 600 59.7 26.4
-9.9787 49.52 6.2 10.3 32 9 600 59.6 26.6
-9.9587 49.52 6.2 10.3 32 9 600 59.6 26.7
-9.9387 49.52 6.2 10.3 32 8.9 600 59.5 26.8
-9.9186 49.52 6.2 10.3 32 8.9 600 59.5 27.3
-9.8986 49.52 6.2 10.3 32 8.9 600 59.5 27.5
-9.8786 49.52 6.2 10.3 32 8.9 600 59.9 27.6
-9.8585 49.52 6.2 10.3 32 8.8 600 60.6 27.6
-9.8385 49.52 6.2 10.3 32 8.8 600 61.1 27.8
-9.8185 49.52 6.2 10.3 32 8.8 600 61.2 27.9
-9.7984 49.52 6.2 10.3 32 8.8 600 61.2 28
-9.7784 49.52 6.2 10.3 31.9 8.8 600 61.1 28.4
-9.7584 49.52 6.2 10.3 31.9 8.8 600 61 28.3
-9.7383 49.52 6.2 10.3 31.9 8.8 600 60.8 28.2
-9.7183 49.52 6.2 10.3 31.9 8.9 600 60.1 28.1
-9.6983 49.52 6.2 10.3 31.9 8.9 600 59.5 28
-9.6782 49.52 6.2 10.3 31.9 8.9 600 59.2 27.9
-9.6582 49.52 6.2 10.3 31.9 8.9 600 59.7 28.2
-9.6382 49.52 6.2 10.3 31.8 8.9 600 60.3 28.5
-9.6182 49.52 6.2 10.3 31.8 8.9 600 60.4 28.5
-9.5981 49.52 6.2 10.3 31.8 9 600 60.4 28.5
-9.5781 49.52 6.2 10.3 31.8 9 600 60.4 28.5
-9.5581 49.52 6.2 10.3 31.8 9 600 60.4 28.7
-9.538 49.52 6.2 10.3 31.8 9 600 60.4 29
-9.518 49.52 6.2 10.3 31.8 9 600 60.4 29.3
-9.498 49.52 6.2 10.3 31.7 9 600 60.1 29.6
-9.4779 49.52 6.2 10.3 31.7 9.1 600 59.5 30.1
-9.4579 49.52 6.2 10.3 31.7 9.1 600 59.3 30.4
-9.4379 49.52 6.2 10.3 31.7 9.1 600 59.3 30.6
-9.4178 49.52 6.2 10.3 31.7 9.1 600 59.3 30.6
-9.3978 49.52 6.2 10.3 31.6 9.1 600 59.4 30.8
-9.3778 49.52 6.2 10.3 31.6 9.1 600 59.9 31.6
-9.3577 49.52 6.2 10.3 31.6 9.1 600 60.3 32.7
-9.3377 49.52 6.2 10.3 31.6 9.1 600 60.3 33.7
-9.3177 49.52 6.2 10.3 31.5 9.1 600 60.4 33.3
-9.2977 49.52 6.2 10.3 31.5 9.1 600 60.8 32.9
-9.2776 49.52 6.2 10.3 31.5 9.1 600 61 32.7
-9.2576 49.52 6.2 10.3 31.5 9.1 600 60.3 32.2
-9.2376 49.52 6.2 10.3 31.5 9.1 600 59.5 31.5
-9.2175 49.52 6.2 10.3 31.5 9.1 600 59.2 31.1
-9.1975 49.52 6.2 10.3 31.5 9.1 600 59.1 31
-9.1775 49.52 6.2 10.3 31.5 9.1 600 59.1 30.9
-9.1574 49.52 6.2 10.3 31.6 9.1 600 59.6 31
-9.1374 49.52 6.2 10.3 31.6 9.1 600 60.3 31.3
-9.1174 49.52 6.2 10.3 31.6 9.1 600 60.7 31.5
-9.0973 49.52 6.2 10.3 31.6 9.1 600 60.8 31.5
-9.0773 49.52 6.2 10.3 31.6 9.1 600 60.8 31.4
-9.0573 49.52 6.2 10.3 31.5 9 600 60.8 31
-9.0372 49.52 6.2 10.3 31.5 9 600 60.7 30.3
-9.0172 49.52 6.2 10.3 31.5 9 600 60.7 29.8
-8.9972 49.52 6.2 10.3 31.4 9 600 60.7 29.5
-8.9772 49.52 6.2 10.3 31.4 9 600 60.6 29.2
-8.9571 49.52 6.1 10.3 31.3 8.9 600 60.6 29.2
-8.9371 49.52 6.1 10.3 31.2 8.9 600 60.6 29.2
-8.9171 49.52 6.1 10.3 31.1 8.8 600 60.6 29.2
-8.897 49.52 6.1 10.3 31 8.8 600 60.6 29.3
-8.877 49.52 6.1 10.3 30.9 8.8 600 60.6 29.4
-8.857 49.52 6.1 10.3 30.9 8.8 600 60.6 29.3
-8.8369 49.52 6.1 10.3 30.8 8.7 600 60.6 29.1
-8.8169 49.52 6.1 10.3 30.8 8.8 600 60.6 29.2
-8.7969 49.52 6.1 10.3 30.8 8.8 600 60.6 29.3
-8.7768 49.52 6.1 10.3 30.8 8.9 600 60.6 29.5
-8.7568 49.52 6.1 10.3 30.9 9 600 60.4 29.7
-8.7368 49.52 6.1 10.3 30.9 9 600 59.7 30.2
-8.7167 49.52 6.1 10.2 30.9 9.1 600 59.4 30.8
-8.6967 49.52 6.1 10.2 30.8 9.1 600 59.3 31
-8.6767 49.52 6.1 10.2 30.8 9.1 600 59.3 31.1
-8.6567 49.52 6.1 10.2 30.8 9.1 600 59.3 31.9
-8.6366 49.52 6.1 10.2 30.8 9.1 600 59.2 33
-8.6166 49.52 6.1 10.2 30.8 9.1 600 59.2 33.8
-8.5966 49.52 6.1 10.2 30.7 9.1 600 59.2 34.9
-8.5765 49.52 6.1 10.2 30.7 9.1 600 59.1 36.1
-8.5565 49.52 6.1 10.2 30.7 9.2 600 59.1 37.7
-8.5365 49.52 6.1 10.2 30.6 9.2 600 59.2 40.9
-8.5164 49.52 6.1 10.2 30.6 9.1 600 59.9 43.8
-8.4964 49.52 6.1 10.2 30.5 9.1 600 60.1 47.3
-8.4764 49.52 6.1 10.2 30.5 9 600 59.9 51.1
-8.4563 49.52 6.1 10.2 30.4 9 600 59.9 54
-8.4363 49.52 6.1 10.2 30.4 9 600 59.9 57.9
-8.4163 49.52 6.1 10.2 30.4 9.2 587 59.9 61.6
-8.3962 49.52 6.1 10.2 30.4 9.3 575 59.8 65
-8.3762 49.52 6.1 10.2 30.5 9.4 575 60.1 64.8
-8.3562 49.52 6.1 10.2 30.5 9.4 575 60.1 68.6
-8.3362 49.52 6.1 10.2 30.5 9.5 575 60.2 70.9
-8.3161 49.52 6.1 10.2 30.6 9.6 575 60.2 69.6
-8.2961 49.52 6.1 10.2 30.6 9.7 575 60.2 68.2
-8.2761 49.52 6.1 10.2 30.6 9.8 575 60.2 67
-8.256 49.52 6.1 10.2 30.6 9.7 575 60.3 65.3
-8.236 49.52 6.1 10.2 30.5 9.7 575 60.2 63.1
-8.216 49.52 6.1 10.2 30.4 9.6 575 60.2 61.4
-8.1959 49.52 6.1 10.2 30.4 9.6 575 60.2 59.4
-8.1759 49.52 6.1 10.2 30.3 9.6 575 60.2 57.5
-8.1559 49.52 6.1 10.2 30.3 9.5 575 60.2 56.2
-8.1358 49.52 6.1 10.2 30.3 9.5 576 60.1 55.2
-8.1158 49.52 6.1 10.2 30.3 9.5 600 60.1 54
-8.0958 49.52 6.1 10.2 30.3 9.5 600 60 52.7
-8.0757 49.52 6.1 10.2 30.2 9.4 600 59.9 51.3
-8.0557 49.52 6.1 10.2 30.2 9.4 600 59.6 49.9
-8.0357 49.52 6.1 10.2 30.2 9.4 600 59 48.6
-8.0156 49.52 6.1 10.2 30.2 9.4 600 58.8 47
-7.9956 49.52 6.1 10.2 30.2 9.4 600 58.4 46.5
-7.9756 49.52 6.1 10.2 30.1 9.3 600 58 47
-7.9556 49.52 6.1 10.2 30.1 9.3 600 57.9 47.4
-7.9355 49.52 6.1 10.2 30 9.3 600 60.1 48.5
-7.9155 49.52 6.1 10.2 30 9.3 600 63 50
-7.8955 49.52 6.1 10.2 29.9 9.3 600 65.5 51.1
-7.8754 49.52 6.1 10.2 29.8 9.2 600 65.6 51.4
-7.8554 49.52 6.1 10.2 29.7 9.2 600 64.9 51.5
-7.8354 49.52 6.1 10.2 29.7 9.2 600 64.3 51.8
-7.8153 49.52 6.1 10.2 29.6 9.2 600 64 52.5
-7.7953 49.52 6.1 10.2 29.6 9.2 600 63.8 53.3
-7.7753 49.52 6.1 10.2 29.6 9.2 600 63.6 54
-7.7552 49.52 6.1 10.2 29.5 9.2 600 63.5 54.4
-7.7352 49.52 6.1 10.2 29.5 9.2 600 63.4 54.9
-7.7152 49.52 6.1 10.2 29.5 9.2 600 63.2 55.8
-7.6951 49.52 6.1 10.2 29.6 9.3 600 63.2 57.3
-7.6751 49.52 6.1 10.2 29.6 9.3 600 63.1 58.8
-7.6551 49.52 6.1 10.2 29.6 9.3 600 63 59.5
-7.6351 49.52 6.1 10.2 29.7 9.4 600 63 59.8
-7.615 49.52 6.1 10.2 29.7 9.4 600 63 59.8
-7.595 49.52 6.1 10.2 29.8 9.4 600 62.9 60.7
-7.575 49.52 6.1 10.2 29.8 9.5 600 62.9 61.6
-7.5549 49.52 6.1 10.2 29.9 9.5 600 62.9 63
-7.5349 49.52 6.1 10.2 29.9 9.5 600 62.9 64.7
-7.5149 49.52 6.1 10.2 29.9 9.6 600 62.8 66.7
-7.4948 49.52 6.1 10.2 29.9 9.6 600 62.8 68.7
-7.4748 49.52 6.1 10.2 30 9.7 600 62.8 70.7
-7.4548 49.52 6.1 10.2 30 9.7 600 62.8 72.5
-7.4347 49.52 6.1 10.2 30 9.7 600 62.8 73.7
-7.4147 49.52 6.1 10.2 29.9 9.7 600 62.9 74.7
-7.3947 49.52 6.1 10.2 29.9 9.6 600 62.9 75
-7.3746 49.52 6.1 10.2 29.8 9.6 600 62.9 73.7
-7.3546 49.52 6.1 10.2 29.8 9.5 600 63 71.9
-7.3346 49.52 6.1 10.2 29.7 9.5 600 63 70.6
-7.3146 49.52 6.1 10.2 29.6 9.4 600 63.1 70.3
-7.2945 49.52 6.1 10.2 29.5 9.4 600 63.1 70.3
-7.2745 49.52 6.1 10.2 29.5 9.3 600 63.2 69.5
-7.2545 49.52 6 10.2 29.4 9.3 600 63.3 68
-7.2344 49.52 6 10.2 29.4 9.3 600 63.4 66.6
-7.2144 49.52 6 10.2 29.4 9.2 600 63.5 65
-7.1944 49.52 6 10.2 29.3 9.2 600 63.6 63.1
-7.1743 49.52 6 10.2 29.3 9.2 600 63.6 61
-7.1543 49.52 6 10.2 29.1 9.1 600 63.7 57.9
-7.1343 49.52 6 10.3 29 8.9 600 63.8 54.7
-7.1142 49.52 6 10.3 28.8 8.8 600 64 51.7
-7.0942 49.52 6 10.3 28.7 8.6 600 64.1 48.5
-7.0742 49.52 6 10.3 28.5 8.5 600 64.3 45.3
-7.0541 49.52 6 10.3 28.3 8.4 600 64.4 42.4
-7.0341 49.52 6.1 10.4 28.2 8.2 605 64.5 39.7
-7.0141 49.52 6.1 10.4 28 8.1 650 64.6 37
-6.9941 49.52 6.1 10.4 27.9 7.9 650 64.7 35
-6.974 49.52 6.1 10.4 27.8 7.8 650 64.9 33.3
-6.954 49.52 6.1 10.4 27.7 7.7 650 65.1 31.8
-6.934 49.52 6.1 10.4 27.6 7.6 650 65.3 30.6
-6.9139 49.52 6.1 10.5 27.5 7.4 650 65.5 29.7
-6.8939 49.52 6.1 10.5 27.4 7.3 650 65.6 29.1
-6.8739 49.52 6.1 10.5 27.4 7.3 650 66 29.2
-6.8538 49.52 6.1 10.5 27.6 7.4 650 66.2 29.4
-6.8338 49.52 6.1 10.4 27.7 7.5 650 66.3 29.7
-6.8138 49.52 6.1 10.4 27.9 7.7 650 66.5 30.2
-6.7937 49.52 6.1 10.4 28 7.7 650 66.5 30.6
-6.7737 49.52 6.1 10.4 28.2 7.8 650 66.7 31.2
-6.7537 49.52 6.1 10.4 28.3 7.9 635 67 32.1
-6.7336 49.52 6.1 10.4 28.4 8 625 67 32.8
-6.7136 49.52 6.1 10.4 28.6 8 625 64.3 32.6
-6.6936 49.52 6.1 10.4 28.7 8.1 625 62.5 32.7
-6.6736 49.52 6.1 10.4 28.7 8.2 625 62.6 33.6
-6.6535 49.52 6.1 10.4 28.8 8.2 625 63 34.2
-6.6335 49.52 6.1 10.3 28.9 8.3 625 63.2 34.9
-6.6135 49.52 6.1 10.3 29 8.3 625 63.4 35.6
-6.5934 49.52 6.1 10.3 29 8.3 625 63.7 35.9
-6.5734 49.52 6.1 10.3 29 8.2 625 64.1 36.2
-6.5534 49.52 6.1 10.3 29 8.2 625 64.5 35.7
-6.5333 49.52 6.1 10.3 29 8.2 625 63.7 34.3
-6.5133 49.52 6.1 10.3 29 8.1 625 60.6 32.4
-6.4933 49.52 6.1 10.3 29 8.1 625 59.4 31
-6.4732 49.52 6.1 10.3 29 8.1 625 59.6 30
-6.4532 49.52 6.1 10.3 29 8 625 59.9 29
-6.4332 49.52 6.1 10.4 29 8 625 60.1 28.3
-6.4131 49.52 6.1 10.4 29 7.9 625 60.2 27.7
-6.3931 49.52 6.1 10.4 29 7.9 625 60.4 27.1
-6.3731 49.52 6.1 10.4 29 7.8 625 60.6 26.7
-6.3531 49.52 6.1 10.4 29 7.8 625 60.9 26.3
-6.333 49.52 6.1 10.4 29 7.7 625 61.2 25.9
-6.313 49.52 6.1 10.4 29 7.7 625 61.3 25.5
-6.293 49.52 6.1 10.4 28.9 7.7 625 61.5 25
-6.2729 49.52 6.1 10.4 28.9 7.6 625 61.3 24.6
-6.2529 49.52 6.1 10.4 28.9 7.5 625 61.2 24.1
-6.2329 49.52 6.1 10.4 28.8 7.5 625 61.3 23.7
-6.2128 49.52 6.1 10.4 28.8 7.4 625 61.5 23.1
-6.1928 49.52 6.1 10.4 28.8 7.4 625 61.6 22.5
-6.1728 49.52 6.1 10.4 28.7 7.3 625 61.8 22
-6.1527 49.52 6.1 10.4 28.6 7.2 625 61.9 21.6
-6.1327 49.52 6.1 10.4 28.6 7.2 625 62 21.2
-6.1127 49.52 6.1 10.4 28.5 7.1 625 62.1 20.9
-6.0926 49.52 6.1 10.4 28.4 7 625 61.7 20.6
-6.0726 49.52 6.1 10.4 28.3 6.9 625 61.1 20.3
-6.0526 49.52 6.1 10.4 28.3 6.9 625 60.9 20.1
-6.0326 49.52 6.1 10.4 28.3 6.9 625 61 20.2
-6.0125 49.52 6.1 10.4 28.2 6.8 627 61 20.2
-5.9925 49.52 6.1 10.4 28.2 6.8 627 61 20.1
-5.9725 49.52 6.1 10.4 28.2 6.8 627 61 20.1
-5.9524 49.52 6.1 10.4 28.1 6.8 627 61 20
-5.9324 49.52 6.1 10.4 28.1 6.8 622 61 20
-5.9124 49.52 6.1 10.4 28.1 6.8 600 61.2 19.9
-5.8923 49.52 6.1 10.4 28.1 6.8 600 61.3 19.9
-5.8723 49.52 6.1 10.4 28.1 6.8 600 61.4 20
-5.8523 49.52 6.1 10.4 28.1 6.8 600 61.6 20
-5.8322 49.52 6.1 10.4 28.1 6.9 600 61.7 20
-5.8122 49.52 6.1 10.4 28.1 6.9 600 61.7 20
-5.7922 49.52 6.1 10.4 28.1 6.9 600 61.8 20
-5.7721 49.52 6.1 10.4 28.1 6.9 600 61.7 19.9
-5.7521 49.52 6.1 10.4 28 6.9 600 61.8 19.9
-5.7321 49.52 6.1 10.4 27.9 6.8 600 61.8 19.8
-5.7121 49.52 6.1 10.4 27.9 6.8 600 61.9 19.7
-5.692 49.52 6.1 10.4 27.8 6.7 600 62 19.6
-5.672 49.52 6.1 10.4 27.7 6.7 600 62.1 19.4
-5.652 49.52 6.1 10.4 27.7 6.7 598 62.3 19.4
-5.6319 49.52 6.1 10.4 27.6 6.7 598 62.4 19.4
-5.6119 49.52 6.1 10.4 27.6 6.7 598 62.5 19.4
-5.5919 49.52 6.1 10.4 27.6 6.7 598 62.5 19.4
-5.5718 49.52 6.1 10.4 27.5 6.7 598 62.5 19.4
-5.5518 49.52 6.1 10.4 27.5 6.7 598 62.4 19.5
-5.5318 49.52 6.1 10.4 27.5 6.7 598 62.1 19.4
-5.5117 49.52 6.1 10.4 27.4 6.7 598 61.8 19.4
-5.4917 49.52 6.1 10.4 27.4 6.7 576 61.7 19.5
-5.4717 49.52 6.1 10.4 27.4 6.7 575 61.8 19.5
-5.4516 49.52 6.1 10.4 27.3 6.6 575 61.8 19.6
-5.4316 49.52 6.1 10.4 27.3 6.6 575 61.9 19.5
-5.4116 49.52 6.1 10.4 27.3 6.6 575 61.9 19.3
-5.3915 49.52 6.1 10.4 27.3 6.6 575 61.9 19.2
-5.3715 49.52 6.1 10.4 27.2 6.6 573 61.7 19
-5.3515 49.52 6.1 10.4 27.2 6.6 568 61.5 18.9
-5.3315 49.52 6.1 10.4 27.2 6.5 550 61.4 18.7
-5.3114 49.52 6.1 10.4 27.1 6.5 550 61.5 18.6
-5.2914 49.52 6.1 10.4 27.1 6.5 550 61.5 18.5
-5.2714 49.52 6.1 10.4 27.1 6.5 550 61.5 18.4
-5.2513 49.52 6.1 10.4 27 6.5 550 61.6 18.2
-5.2313 49.52 6.1 10.4 27 6.4 550 61.7 18.1
-5.2113 49.52 6.1 10.4 26.9 6.4 550 61.8 18
-5.1912 49.52 6.1 10.4 26.8 6.3 550 62 17.9
-5.1712 49.52 6.1 10.4 26.7 6.2 550 62.1 17.8
-5.1512 49.52 6.1 10.4 26.7 6.2 550 62.5 17.7
-5.1311 49.52 6.1 10.4 26.6 6.1 550 62.8 17.5
-5.1111 49.52 6.1 10.4 26.5 6.1 550 63 17.3
-5.0911 49.52 6.1 10.4 26.5 6.1 532 63.1 17.1
-5.071 49.52 6.1 10.4 26.4 6 525 63.2 17
-5.051 49.52 6.1 10.4 26.3 6 525 63.2 16.9
-5.031 49.52 6.1 10.3 26.3 6 525 63.4 16.9
-5.011 49.52 6.1 10.3 26.2 5.9 525 63.5 16.8
-4.9909 49.52 6.1 10.3 26.1 5.9 525 63.9 16.8
-4.9709 49.52 6.1 10.3 26.1 5.9 525 64.4 16.8
-4.9509 49.52 6.2 10.3 26 5.8 525 64.8 16.8
-4.9308 49.52 6.2 10.3 25.9 5.8 525 64.9 16.7
-4.9108 49.52 6.2 10.3 25.8 5.8 525 65 16.8
-4.8908 49.52 6.2 10.3 25.8 5.8 525 65.1 16.8
-4.8707 49.52 6.2 10.3 25.7 5.8 525 65.2 16.7
-4.8507 49.52 6.2 10.3 25.6 5.8 525 65.2 16.4
-4.8307 49.52 6.2 10.3 25.5 5.7 525 65.3 16.3
-4.8106 49.52 6.2 10.3 25.4 5.7 525 65.3 16.3
-4.7906 49.52 6.2 10.3 25.4 5.6 525 65.4 16.2
-4.7706 49.52 6.2 10.3 25.3 5.6 525 65.5 16.2
-4.7505 49.52 6.2 10.3 25.2 5.6 525 65.5 16.3
-4.7305 49.52 6.2 10.3 25.1 5.5 525 65.7 16.3
-4.7105 49.52 6.2 10.3 25 5.5 525 65.7 16.4
-4.6905 49.52 6.2 10.3 24.9 5.4 525 65.8 16.6
-4.6704 49.52 6.2 10.3 24.8 5.4 525 65.9 16.7
-4.6504 49.52 6.2 10.3 24.6 5.4 525 66 17
-4.6304 49.52 6.2 10.3 24.6 5.4 525 66.1 17.7
-4.6103 49.52 6.2 10.3 24.5 5.4 525 66.2 18.2
-4.5903 49.52 6.2 10.3 24.4 5.5 525 66.3 18.2
-4.5703 49.52 6.2 10.3 24.3 5.5 525 66.5 17.8
-4.5502 49.52 6.2 10.3 24.2 5.4 525 66.5 17.8
-4.5302 49.52 6.2 10.3 24.1 5.4 506 66.6 18
-4.5102 49.52 6.2 10.3 24.1 5.4 500 66.7 18.1
-4.4901 49.52 6.2 10.3 24 5.4 500 66.4 18.3
-4.4701 49.52 6.2 10.3 23.9 5.4 500 66 18.4
-4.4501 49.52 6.2 10.3 23.8 5.4 500 65.8 18.6
-4.43 49.52 6.2 10.3 23.8 5.4 500 65.8 18.8
-4.41 49.52 6.2 10.3 23.7 5.4 500 65.9 19
-4.39 49.52 6.2 10.3 23.7 5.4 500 65.9 19.3
-4.37 49.52 6.2 10.2 23.6 5.5 500 66 19.5
-4.3499 49.52 6.2 10.2 23.6 5.5 500 66 19.8
-4.3299 49.52 6.2 10.2 23.6 5.6 500 66.1 20.1
-4.3099 49.52 6.2 10.2 23.6 5.6 500 66.1 20.5
-4.2898 49.52 6.2 10.2 23.5 5.6 500 66.2 20.8
-4.2698 49.52 6.2 10.2 23.5 5.7 489 66.2 21.3
-4.2498 49.52 6.2 10.2 23.5 5.7 450 66.3 21.7
-4.2297 49.52 6.2 10.1 23.4 5.7 450 66.5 22.1
-4.2097 49.52 6.3 10.1 23.4 5.7 450 66.9 22.5
-4.1897 49.52 6.3 10.1 23.3 5.7 450 67.3 23
-4.1696 49.52 6.3 10.1 23.3 5.7 450 67.5 23.4
-4.1496 49.52 6.3 10.1 23.2 5.7 450 67.6 23.7
-4.1296 49.52 6.3 10.1 23.2 5.7 450 67.7 24
-4.1095 49.52 6.3 10.1 23.2 5.8 450 67.8 24.1
-4.0895 49.52 6.3 10 23.2 5.8 450 67.8 24.1
-4.0695 49.52 6.3 10 23.2 5.8 450 67.8 24.1
-4.0495 49.52 6.3 10 23.2 5.8 450 67.7 24
-4.0294 49.52 6.3 10 23.2 5.8 450 67.7 23.8
-4.0094 49.52 6.3 9.9 23.3 5.8 450 67.7 23.6
-3.9894 49.52 6.3 9.9 23.3 5.8 376 67.7 23.5
-3.9693 49.52 6.3 9.9 23.3 5.8 350 67.6 23.4
-3.9493 49.52 6.3 9.8 23.3 5.7 350 67.6 23.3
-3.9293 49.52 6.4 9.8 23.3 5.7 350 67.6 23.2
-3.9092 49.52 6.4 9.8 23.4 5.7 350 67.5 23.2
-3.8892 49.52 6.4 9.8 23.4 5.7 350 67.5 23.1
-3.8692 49.52 6.4 9.7 23.4 5.7 350 67.5 23.1
-3.8491 49.52 6.4 9.7 23.4 5.7 350 67.5 23.1
-3.8291 49.52 6.4 9.7 23.3 5.6 350 67.9 23.2
-3.8091 49.52 6.4 9.7 23.3 5.5 350 68.5 23.3
-3.789 49.52 6.4 9.7 23.2 5.5 350 68.6 23.4
-3.769 49.52 6.4 9.6 23.2 5.5 350 68.5 23.3
-3.749 49.52 6.4 9.6 23.2 5.5 350 68.4 23.3
-3.729 49.52 6.4 9.6 23.2 5.5 350 68.4 23.2
-3.7089 49.52 6.4 9.6 23.2 5.5 330 68.3 23
-3.6889 49.52 6.5 9.5 23.2 5.5 275 68.2 22.9
-3.6689 49.52 6.5 9.5 23.1 5.5 275 68.1 22.8
-3.6488 49.52 6.5 9.5 23.1 5.5 275 68.3 22.5
-3.6288 49.52 6.5 9.5 23.1 5.5 275 68.8 22.5
-3.6088 49.52 6.5 9.4 23.1 5.5 275 69.1 22.4
-3.5887 49.52 6.5 9.4 23.1 5.4 275 69.1 22.2
-3.5687 49.52 6.5 9.4 23.1 5.4 275 69.1 22.1
-3.5487 49.52 6.5 9.4 23.1 5.4 275 69 22
-3.5286 49.52 6.5 9.4 23 5.4 275 68.9 22
-3.5086 49.52 6.5 9.4 23 5.4 275 68.8 22
-3.4886 49.52 6.5 9.4 22.9 5.4 275 68.7 22
-3.4685 49.52 6.5 9.4 22.9 5.4 275 68.6 22
-3.4485 49.52 6.5 9.4 22.8 5.4 275 68.3 21.9
-3.4285 49.52 6.5 9.4 22.7 5.3 275 68.2 22
-3.4085 49.52 6.5 9.4 22.7 5.3 275 67.9 22
-3.3884 49.52 6.5 9.4 22.6 5.3 275 69.3 22.4
-3.3684 49.52 6.5 9.4 22.6 5.3 275 68.7 22.4
-3.3484 49.52 6.5 9.4 22.5 5.3 275 67.8 22.3
-3.3283 49.52 6.5 9.4 22.5 5.3 275 69.2 22.6
-3.3083 49.52 6.5 9.4 22.4 5.2 275 72.6 23.4
-3.2883 49.52 6.5 9.4 22.4 5.2 275 76.3 24.3
-3.2682 49.52 6.5 9.4 22.3 5.2 275 76.3 24.3
-3.2482 49.52 6.5 9.4 22.2 5.2 275 75.5 24.2
-3.2282 49.52 6.5 9.4 22.1 5.1 275 75.2 24.2
-3.2081 49.52 6.5 9.5 21.9 5.1 275 75.3 24.1
-3.1881 49.52 6.5 9.5 21.7 5.1 275 75.2 23.9
-3.1681 49.52 6.5 9.5 21.6 5 295 75 23.7
-3.148 49.52 6.5 9.6 21.5 5 350 75 23.6
-3.128 49.52 6.5 9.6 21.3 4.9 350 75 23.5
-3.108 49.52 6.5 9.6 21.2 4.9 350 75 23.6
-3.0879 49.52 6.5 9.6 21.1 4.8 350 75.1 23.7
-3.0679 49.52 6.5 9.7 20.9 4.8 350 75.1 23.7
-3.0479 49.52 6.5 9.7 20.8 4.7 350 75.1 24
-3.0279 49.52 6.5 9.7 20.6 4.7 350 75.2 24.2
-3.0078 49.52 6.5 9.7 20.6 4.7 350 75.3 24.6
-2.9878 49.52 6.5 9.7 20.6 4.7 350 75.3 25.1
-2.9678 49.52 6.5 9.7 20.6 4.8 350 75.4 25.8
-2.9477 49.52 6.5 9.7 20.6 4.8 350 75.4 26.6
-2.9277 49.52 6.5 9.7 20.6 4.9 350 75.5 27.3
-2.9077 49.52 6.5 9.6 20.6 4.9 350 75.6 27.7
-2.8876 49.52 6.5 9.6 20.6 5 310 75.8 28.2
-2.8676 49.52 6.5 9.6 20.6 5 300 76 29.1
-2.8476 49.52 6.5 9.6 20.6 5 300 76.1 30
-2.8275 49.52 6.5 9.6 20.6 5.1 300 76.5 31
-2.8075 49.52 6.5 9.6 20.6 5.1 300 77 31.9
-2.7875 49.52 6.5 9.5 20.6 5.2 300 77.3 32.8
-2.7674 49.52 6.5 9.5 20.6 5.2 300 79 33.7
-2.7474 49.52 6.5 9.5 20.6 5.3 300 80.4 34.5
-2.7274 49.52 6.5 9.5 20.6 5.3 300 79 34.1
-2.7074 49.52 6.5 9.5 20.6 5.3 300 71.2 30.9
-2.6873 49.52 6.5 9.5 20.6 5.3 300 62 27.1
-2.6673 49.52 6.5 9.5 20.6 5.3 300 59 25.4
-2.6473 49.52 6.5 9.5 20.6 5.3 300 60.4 25.3
-2.6272 49.52 6.5 9.5 20.6 5.2 300 61.7 25.4
-2.6072 49.52 6.5 9.5 20.7 5.2 300 62.2 25.2
-2.5872 49.52 6.5 9.5 20.7 5.2 300 63.1 25.2
-2.5671 49.52 6.5 9.5 20.7 5.2 300 64 25.2
-2.5471 49.52 6.5 9.5 20.7 5.2 300 64.4 25.1
-2.5271 49.52 6.5 9.5 20.7 5.2 300 64.6 25
-2.507 49.52 6.5 9.5 20.7 5.2 300 64.2 24.7
-2.487 49.52 6.5 9.5 20.7 5.2 300 63.8 24.6
-2.467 49.52 6.5 9.5 20.7 5.2 300 64 24.6
-2.4469 49.52 6.5 9.4 20.8 5.3 300 64.2 24.7
-2.4269 49.52 6.5 9.4 20.8 5.3 300 62.7 24.7
-2.4069 49.52 6.5 9.4 20.8 5.3 300 61.2 24.6
-2.3869 49.52 6.5 9.4 20.9 5.3 300 65.5 26.3
-2.3668 49.52 6.5 9.4 20.9 5.4 300 74.3 29.3
-2.3468 49.52 6.5 9.4 20.9 5.4 300 81.8 31.9
-2.3268 49.52 6.5 9.3 21 5.4 279 81.1 32.1
-2.3067 49.52 6.5 9.3 21 5.4 275 79 32
-2.2867 49.52 6.5 9.3 21.1 5.5 275 81.9 33.5
-2.2667 49.52 6.5 9.3 21.1 5.5 275 84.7 34.7
-2.2466 49.52 6.5 9.3 21.1 5.5 275 84.4 34.6
-2.2266 49.52 6.5 9.3 21.1 5.5 275 76.6 31.8
-2.2066 49.52 6.5 9.2 21.1 5.5 275 65.9 27.7
-2.1865 49.52 6.5 9.2 21.1 5.5 275 60.2 25.6
-2.1665 49.52 6.5 9.2 21.1 5.5 275 62.1 26.2
-2.1465 49.52 6.5 9.2 21 5.5 275 64.8 26.9
-2.1264 49.52 6.5 9.2 21 5.4 275 66.2 27.2
-2.1064 49.52 6.5 9.2 20.9 5.4 275 67 27.3
-2.0864 49.52 6.5 9.2 20.9 5.4 275 67.7 27.3
-2.0664 49.52 6.5 9.2 20.8 5.4 283 68.3 27.3
-2.0463 49.52 6.5 9.2 20.8 5.3 300 68.6 27.2
-2.0263 49.52 6.5 9.2 20.8 5.3 300 68.8 27
-2.0063 49.52 6.5 9.2 20.7 5.3 300 68.9 26.7
-1.9862 49.52 6.5 9.2 20.7 5.2 300 68.6 26.4
-1.9662 49.52 6.5 9.2 20.6 5.2 300 68.1 26.2
-1.9462 49.52 6.5 9.2 20.6 5.3 300 69 26.3
-1.9261 49.52 6.5 9.2 20.6 5.3 300 72.3 27.2
-1.9061 49.52 6.5 9.2 20.6 5.3 300 75.6 28.2
-1.8861 49.52 6.5 9.2 20.6 5.3 300 76.6 28.9
-1.866 49.52 6.5 9.2 20.6 5.3 300 76.1 29.2
-1.846 49.52 6.5 9.2 20.6 5.4 300 75.4 29.6
-1.826 49.52 6.5 9.2 20.6 5.4 300 75 30
-1.8059 49.52 6.5 9.2 20.6 5.4 300 74.7 30.3
-1.7859 49.52 6.5 9.2 20.6 5.4 321 74.5 30.7
-1.7659 49.52 6.5 9.2 20.6 5.5 325 74.3 31.1
-1.7459 49.52 6.5 9.2 20.6 5.5 325 74.2 31.5
-1.7258 49.52 6.5 9.2 20.6 5.5 325 74.1 31.7
-1.7058 49.52 6.5 9.2 20.6 5.5 325 74 32
-1.6858 49.52 6.5 9.2 20.6 5.5 325 74 32.1
-1.6657 49.52 6.5 9.2 20.6 5.5 325 73.9 32.1
-1.6457 49.52 6.5 9.2 20.5 5.5 325 73.9 32.2
-1.6257 49.52 6.5 9.2 20.6 5.5 325 73.9 32.2
-1.6056 49.52 6.5 9.2 20.6 5.5 325 73.8 32.2
-1.5856 49.52 6.5 9.2 20.6 5.5 325 73.8 32.3
-1.5656 49.52 6.5 9.2 20.7 5.5 325 73.7 32.4
-1.5455 49.52 6.5 9.2 20.7 5.5 325 73.7 32.2
-1.5255 49.52 6.5 9.2 20.7 5.5 325 73.7 31.9
-1.5055 49.52 6.5 9.2 20.7 5.5 334 73.6 31.7
-1.4854 49.52 6.5 9.2 20.8 5.5 350 73.6 31.4
-1.4654 49.52 6.5 9.2 20.8 5.6 350 73.5 31.2
-1.4454 49.52 6.5 9.2 20.8 5.5 350 73.5 31
-1.4254 49.52 6.5 9.2 20.8 5.5 350 73.4 30.9
-1.4053 49.52 6.5 9.2 20.8 5.5 350 73.3 30.7
-1.3853 49.52 6.5 9.2 20.8 5.5 350 73.3 30.7
-1.3653 49.52 6.5 9.2 20.8 5.5 350 73.2 30.7
-1.3452 49.52 6.5 9.3 20.9 5.5 350 73.2 30.6
-1.3252 49.52 6.4 9.3 21 5.5 350 73.2 30.7
-1.3052 49.52 6.4 9.3 21 5.5 352 73.1 30.8
-1.2851 49.52 6.4 9.3 21.1 5.6 352 73.1 30.9
-1.2651 49.52 6.4 9.3 21.2 5.6 352 73.1 30.8
-1.2451 49.52 6.4 9.3 21.2 5.6 373 73.1 30.7
-1.225 49.52 6.4 9.4 21.3 5.6 397 73.1 30.4
-1.205 49.52 6.4 9.4 21.4 5.7 400 73.2 30.3
-1.185 49.52 6.4 9.4 21.5 5.7 400 73.4 30.1
-1.1649 49.52 6.4 9.4 21.6 5.7 400 73.6 30
-1.1449 49.52 6.4 9.4 21.7 5.7 404 74.2 29.7
-1.1249 49.52 6.4 9.4 21.8 5.7 404 74.8 29.5
-1.1049 49.52 6.4 9.5 21.9 5.7 405 72.1 28.4
-1.0848 49.52 6.4 9.5 22.1 5.7 450 68.4 27.1
-1.0648 49.52 6.4 9.5 22.2 5.8 450 64.8 25.8
-1.0448 49.52 6.4 9.5 22.3 5.8 450 65 25.8
-1.0247 49.52 6.4 9.6 22.4 5.8 450 65.3 25.7
-1.0047 49.52 6.4 9.6 22.5 5.8 450 65.6 25.5
-0.9847 49.52 6.4 9.6 22.7 5.8 450 65.7 25.2
-0.9646 49.52 6.4 9.6 22.8 5.8 450 66 24.8
-0.9446 49.52 6.4 9.7 22.9 5.8 468 66.1 24.4
-0.9246 49.52 6.4 9.6 23.1 5.9 489 66.2 24
-0.9045 49.52 6.4 9.6 23.2 5.9 475 66.2 23.7
-0.8845 49.52 6.4 9.6 23.4 6 475 66.1 23.4
-0.8645 49.52 6.4 9.6 23.5 6 475 66.1 23
-0.8444 49.52 6.4 9.6 23.7 6 475 65.9 22.8
-0.8244 49.52 6.4 9.6 23.8 6.1 475 65.8 22.6
-0.8044 49.52 6.4 9.6 23.9 6.1 475 65.6 22.4
-0.7844 49.52 6.4 9.6 24.1 6.1 475 65.4 22.3
-0.7643 49.52 6.4 9.6 24.2 6.1 475 65.2 22.2
-0.7443 49.52 6.4 9.6 24.3 6.2 475 64.8 22.1
-0.7243 49.52 6.4 9.6 24.4 6.2 475 64.5 22
-0.7042 49.52 6.4 9.6 24.5 6.2 475 64.4 21.9
-0.6842 49.52 6.4 9.6 24.5 6.2 475 64.1 21.7
-0.6642 49.52 6.4 9.6 24.6 6.3 521 63.9 21.6
-0.6441 49.52 6.4 9.7 24.7 6.3 525 63.6 21.5
-0.6241 49.52 6.4 9.7 24.8 6.3 525 63.3 21.5
-0.6041 49.52 6.4 9.7 24.9 6.3 525 62.9 21.3
-0.584 49.52 6.4 9.7 25 6.4 525 62.2 21
-0.564 49.52 6.4 9.7 25 6.4 525 61.6 20.8
-0.544 49.52 6.4 9.7 25.1 6.4 525 62.2 20.9
-0.5239 49.52 6.4 9.7 25.2 6.4 525 63.8 21.4
-0.5039 49.52 6.4 9.7 25.2 6.4 525 63.9 21.4
-0.4839 49.52 6.4 9.8 25.2 6.4 525 63.9 21.4
-0.4638 49.52 6.4 9.8 25.3 6.4 525 64.2 21.5
-0.4438 49.52 6.4 9.8 25.3 6.4 525 64.6 21.5
-0.4238 49.52 6.4 9.8 25.4 6.5 525 64.7 21.2
-0.4038 49.52 6.4 9.8 25.4 6.5 533 64.9 20.9
-0.3837 49.52 6.4 9.8 25.6 6.5 548 65 20.7
-0.3637 49.52 6.4 9.8 25.6 6.5 550 65 20.6
-0.3437 49.52 6.4 9.8 25.7 6.5 550 65.1 20.4
-0.3236 49.52 6.4 9.8 25.7 6.5 550 65.1 20.3
-0.3036 49.52 6.4 9.8 25.8 6.5 550 65.1 20.1
-0.2836 49.52 6.4 9.8 25.9 6.5 550 65.1 20
-0.2635 49.52 6.4 9.8 25.9 6.5 550 65.1 19.9
-0.2435 49.52 6.4 9.8 26 6.6 550 65.1 19.8
-0.2235 49.52 6.4 9.7 26.1 6.6 550 65.1 19.8
-0.2034 49.52 6.4 9.7 26.1 6.6 550 65.1 19.7
-0.1834 49.52 6.4 9.7 26.1 6.6 550 65.1 19.6
-0.1634 49.52 6.4 9.7 26.2 6.6 550 65 19.6
-0.1433 49.52 6.4 9.7 26.2 6.6 550 65 19.4
-0.1233 49.52 6.4 9.7 26.2 6.6 550 65 19.3
-0.1033 49.52 6.4 9.7 26.2 6.6 574 65 19.3
-0.0833 49.52 6.4 9.7 26.2 6.6 575 65 19.3
-0.0632 49.52 6.4 9.7 26.3 6.6 575 64.9 19.2
-0.0432 49.52 6.4 9.7 26.3 6.6 575 64.9 19.2
-0.0232 49.52 6.4 9.7 26.3 6.6 575 64.9 19.1
-0.0031 49.52 6.4 9.7 26.3 6.6 575 64.8 19.1
0.0169 49.52 6.4 9.7 26.4 6.6 575 64.8 19.2
0.0369 49.52 6.4 9.7 26.4 6.6 575 64.8 19.3
0.057 49.52 6.4 9.8 26.4 6.6 575 64.8 19.3
0.077 49.52 6.4 9.8 26.5 6.6 575 64.7 19.5
0.097 49.52 6.5 9.9 26.5 6.7 575 64.7 19.7
0.1171 49.52 6.5 10 26.5 6.7 575 64.6 19.8
0.1371 49.52 6.5 10 26.6 6.7 575 64.6 19.7
0.1571 49.52 6.5 10.1 26.6 6.7 575 64.6 19.4
0.1772 49.52 6.5 10.2 26.7 6.8 575 64.5 19.5
0.1972 49.52 6.5 10.3 26.8 6.8 575 64.5 19.5
0.2172 49.52 6.5 10.3 26.8 6.8 575 64.5 19.7
0.2372 49.52 6.6 10.4 26.8 6.9 575 64.5 19.8
0.2573 49.52 6.6 10.5 26.9 6.9 575 64.4 19.9
0.2773 49.52 6.6 10.5 26.9 6.9 575 64.4 20
0.2973 49.52 6.6 10.5 27 6.9 575 64.3 20.1
0.3174 49.52 6.6 10.5 27 6.9 575 64.3 20.2
0.3374 49.52 6.6 10.4 27 6.9 575 64.3 20.2
0.3574 49.52 6.6 10.4 27.1 6.9 575 64.3 20.4
0.3775 49.52 6.5 10.3 27.1 7 575 64.2 20.5
0.3975 49.52 6.5 10.2 27.1 7 575 64.2 20.4
0.4175 49.52 6.5 10.1 27.2 7 575 64.2 20.2
0.4376 49.52 6.5 10 27.2 7 599 64.1 20
0.4576 49.52 6.5 10 27.2 7 600 64.1 20.1
0.4776 49.52 6.5 9.9 27.2 7 600 64.1 20.5
0.4977 49.52 6.5 9.8 27.3 7 600 64.1 20.7
0.5177 49.52 6.4 9.8 27.3 7 600 64 20.3
0.5377 49.52 6.4 9.7 27.3 7 600 64 19.8
0.5577 49.52 6.4 9.7 27.4 7 600 64 19.6
0.5778 49.52 6.4 9.7 27.4 7 600 63.9 19.7
0.5978 49.52 6.4 9.7 27.5 7.1 600 63.9 19.8
0.6178 49.52 6.4 9.7 27.5 7.1 600 63.9 19.9
0.6379 49.52 6.4 9.7 27.5 7.1 600 63.9 20.1
0.6579 49.52 6.4 9.6 27.6 7.1 600 63.9 20.3
0.6779 49.52 6.4 9.6 27.6 7.2 600 63.9 20.2
0.698 49.52 6.4 9.6 27.6 7.2 600 63.8 20.2
0.718 49.52 6.4 9.6 27.7 7.2 600 63.8 20.3
0.738 49.52 6.4 9.6 27.7 7.3 600 63.8 20.4
0.7581 49.52 6.4 9.6 27.8 7.3 600 63.8 20.5
0.7781 49.52 6.4 9.6 27.8 7.3 600 63.8 20.5
0.7981 49.52 6.4 9.6 27.8 7.3 600 63.8 20.5
0.8182 49.52 6.4 9.6 27.9 7.4 600 63.7 20.6
0.8382 49.52 6.4 9.6 27.9 7.4 600 63.7 20.6
0.8582 49.52 6.4 9.6 27.9 7.4 600 63.7 20.6
0.8782 49.52 6.4 9.6 27.9 7.4 600 63.7 20.6
0.8983 49.52 6.4 9.6 28 7.5 600 63.7 20.7
0.9183 49.52 6.4 9.6 28 7.5 600 63.7 20.8
0.9383 49.52 6.4 9.6 28 7.5 600 63.7 20.8
0.9584 49.52 6.4 9.6 28 7.5 600 63.7 20.7
0.9784 49.52 6.4 9.6 28 7.6 600 63.6 20.6
0.9984 49.52 6.4 9.6 28 7.6 600 63.6 20.5
1.0185 49.52 6.4 9.6 28 7.6 600 63.6 20.7
1.0385 49.52 6.4 9.6 28 7.7 600 63.6 20.9
1.0585 49.52 6.5 9.6 28 7.6 600 63.6 21
1.0786 49.52 6.5 9.6 27.9 7.6 600 63.6 21.1
1.0986 49.52 6.5 9.6 27.9 7.5 600 63.6 21.3
1.1186 49.52 6.5 9.6 27.9 7.5 600 63.5 21.5
1.1387 49.52 6.5 9.6 27.9 7.4 600 63.5 21.8
1.1587 49.52 6.5 9.6 27.9 7.5 600 63.5 22
1.1787 49.52 6.5 9.6 28 7.5 600 63.5 22.3
1.1987 49.52 6.5 9.6 28 7.5 600 63.5 22.6
1.2188 49.52 6.5 9.6 28 7.6 600 63.5 22.9
1.2388 49.52 6.5 9.6 28.1 7.6 600 63.4 23
1.2588 49.52 6.5 9.5 28.1 7.6 600 63.4 23.1
1.2789 49.52 6.5 9.5 28.2 7.7 600 63.4 23.2
1.2989 49.52 6.5 9.5 28.2 7.7 600 63.4 23.4
1.3189 49.52 6.5 9.5 28.2 7.7 600 63.4 23.4
1.339 49.52 6.5 9.5 28.3 7.7 600 63.4 23.5
1.359 49.52 6.5 9.5 28.3 7.7 600 63.4 23.4
1.379 49.52 6.5 9.5 28.3 7.7 600 63.4 23.4
1.3991 49.52 6.5 9.5 28.3 7.7 600 63.4 23.3
1.4191 49.52 6.5 9.5 28.3 7.6 600 63.3 23.2
1.4391 49.52 6.5 9.5 28.3 7.5 600 63.3 23.2
1.4592 49.52 6.5 9.5 28.3 7.5 600 63.3 23.2
1.4792 49.52 6.5 9.5 28.3 7.4 600 63.3 23.4
1.4992 49.52 6.5 9.5 28.3 7.3 600 63.3 23.2
1.5192 49.52 6.5 9.5 28.3 7.3 600 63.3 22.6
1.5393 49.52 6.5 9.5 28.3 7.2 600 63.3 21.9
1.5593 49.52 6.5 9.5 28.3 7.3 623 63.3 21.3
1.5793 49.52 6.5 9.5 28.3 7.3 623 63.3 20.8
1.5994 49.52 6.5 9.5 28.3 7.3 600 63.3 20.5
1.6194 49.52 6.5 9.5 28.4 7.3 600 63.3 20.1
1.6394 49.52 6.5 9.5 28.4 7.3 600 63.3 19.8
1.6595 49.52 6.5 9.5 28.4 7.3 600 63.2 19.7
1.6795 49.52 6.5 9.5 28.4 7.3 600 63.2 19.8
1.6995 49.52 6.5 9.4 28.6 7.4 600 63.2 20
1.7196 49.52 6.5 9.4 28.7 7.6 600 63.2 20.3
1.7396 49.52 6.5 9.4 28.8 7.7 600 63.1 20.9
1.7596 49.52 6.5 9.3 28.9 7.8 600 63.1 21.8
1.7797 49.52 6.5 9.3 29 7.9 600 63.1 22.5
1.7997 49.52 6.5 9.3 29.1 8 600 63 22.9
1.8197 49.52 6.5 9.3 29.2 8.1 560 63 23.3
1.8397 49.52 6.5 9.3 29.2 8.1 525 62.9 23.8
1.8598 49.52 6.5 9.2 29.3 8.2 525 62.9 24.6
1.8798 49.52 6.5 9.2 29.3 8.3 525 62.9 25.5
1.8998 49.52 6.5 9.2 29.4 8.3 525 62.8 25.9
1.9199 49.52 6.5 9.2 29.4 8.4 525 62.8 26.3
1.9399 49.52 6.5 9.2 29.5 8.5 525 62.8 26.7
1.9599 49.52 6.6 9.2 29.5 8.5 525 62.7 27.1
1.98 49.52 6.6 9.2 29.6 8.5 525 62.7 27.6
2 49.52 6.6 9.1 29.6 8.6 525 62.7 28.4
-10.8 49.5401 6.3 10.1 30.1 7.5 550 58.7 18.7
-10.78 49.5401 6.3 10.1 30.2 7.5 550 58.8 19.2
-10.7599 49.5401 6.3 10.1 30.2 7.6 550 59 20.2
-10.7399 49.5401 6.3 10.1 30.3 7.6 550 59.1 21.2
-10.7199 49.5401 6.3 10.1 30.4 7.7 550 59.1 21.3
-10.6998 49.5401 6.3 10.1 30.6 7.8 550 59.1 21.1
-10.6798 49.5401 6.3 10.1 30.7 7.9 550 59.1 21.1
-10.6598 49.5401 6.3 10.1 30.8 8 550 59.2 21.6
-10.6397 49.5401 6.3 10.1 30.9 8.1 550 59.1 22.2
-10.6197 49.5401 6.3 10.1 31 8.2 550 59 22.6
-10.5997 49.5401 6.3 10.1 31.1 8.3 550 58.9 23.5
-10.5797 49.5401 6.3 10.1 31.2 8.4 550 58.9 24.5
-10.5596 49.5401 6.3 10.1 31.2 8.5 550 59.1 24.8
-10.5396 49.5401 6.3 10.1 31.3 8.5 550 59 24.8
-10.5196 49.5401 6.3 10.1 31.3 8.5 550 59 24.9
-10.4995 49.5401 6.3 10.1 31.3 8.5 550 59 25.3
-10.4795 49.5401 6.3 10.1 31.4 8.6 550 59 25.9
-10.4595 49.5401 6.3 10.1 31.4 8.6 550 59 26.4
-10.4394 49.5401 6.3 10.1 31.5 8.7 550 59 26.9
-10.4194 49.5401 6.3 10.1 31.5 8.7 550 58.9 27.2
-10.3994 49.5401 6.3 10.1 31.6 8.8 550 58.9 27.3
-10.3793 49.5401 6.3 10.1 31.6 8.9 550 58.9 27.7
-10.3593 49.5401 6.3 10.1 31.7 8.9 550 58.9 28.2
-10.3393 49.5401 6.3 10.1 31.7 9 574 58.9 28.6
-10.3192 49.5401 6.3 10.2 31.7 9 575 58.8 29.1
-10.2992 49.5401 6.3 10.2 31.8 9.1 575 58.8 29.8
-10.2792 49.5401 6.3 10.2 31.8 9.1 575 58.8 30.4
-10.2592 49.5401 6.3 10.2 31.9 9.1 575 58.8 30.9
-10.2391 49.5401 6.3 10.2 31.9 9.2 575 58.8 31.3
-10.2191 49.5401 6.3 10.2 32 9.2 575 58.8 31.7
-10.1991 49.5401 6.3 10.2 32 9.3 575 58.7 32.2
-10.179 49.5401 6.3 10.2 32 9.2 575 58.7 32.5
-10.159 49.5401 6.3 10.2 32 9.2 575 58.7 31.8
-10.139 49.5401 6.2 10.2 32.1 9.2 575 58.7 30.9
-10.1189 49.5401 6.2 10.2 32.1 9.2 575 58.7 30.2
-10.0989 49.5401 6.2 10.2 32.1 9.2 575 59 29.4
-10.0789 49.5401 6.2 10.2 32.1 9.2 586 59.4 29
-10.0588 49.5401 6.2 10.2 32.1 9.2 600 59.6 28.5
-10.0388 49.5401 6.2 10.3 32.1 9.1 600 59.7 28.3
-10.0188 49.5401 6.2 10.3 32.1 9.1 600 59.7 28
-9.9987 49.5401 6.2 10.3 32.2 9.1 600 59.6 28
-9.9787 49.5401 6.2 10.3 32.2 9.1 600 59.6 28.3
-9.9587 49.5401 6.2 10.3 32.2 9.1 600 59.5 28.5
-9.9387 49.5401 6.2 10.3 32.2 9.1 600 59.4 28.6
-9.9186 49.5401 6.2 10.3 32.2 9.1 600 59.4 28.9
-9.8986 49.5401 6.2 10.3 32.2 9 600 59.4 29.1
-9.8786 49.5401 6.2 10.3 32.2 9 600 59.8 29.1
-9.8585 49.5401 6.2 10.3 32.1 9 600 60.4 29
-9.8385 49.5401 6.2 10.3 32.1 8.9 600 61 28.9
-9.8185 49.5401 6.2 10.3 32.1 8.9 600 61 28.8
-9.7984 49.5401 6.2 10.3 32.1 8.9 600 61 28.8
-9.7784 49.5401 6.2 10.3 32.1 8.9 625 61 28.8
-9.7584 49.5401 6.2 10.3 32.1 8.9 625 61 28.6
-9.7383 49.5401 6.2 10.3 32.1 8.9 625 61 28.4
-9.7183 49.5401 6.2 10.3 32.1 8.9 625 60.8 28.3
-9.6983 49.5401 6.2 10.3 32 8.9 625 60.3 28.1
-9.6782 49.5401 6.2 10.3 32 9 625 59.6 28
-9.6582 49.5401 6.2 10.3 32 9 625 59.6 28.1
-9.6382 49.5401 6.2 10.3 32 9 625 60.3 28.4
-9.6182 49.5401 6.2 10.3 32 9 625 60.8 28.7
-9.5981 49.5401 6.2 10.3 32 9 625 61 28.7
-9.5781 49.5401 6.2 10.3 32 9 625 61 28.7
-9.5581 49.5401 6.2 10.3 31.9 9.1 615 61.1 28.9
-9.538 49.5401 6.2 10.3 31.9 9.1 606 61.1 29.3
-9.518 49.5401 6.2 10.3 31.9 9.1 612 61.1 29.7
-9.498 49.5401 6.2 10.3 31.9 9.1 625 61 30.4
-9.4779 49.5401 6.2 10.3 31.9 9.1 625 60.3 30.8
-9.4579 49.5401 6.2 10.3 31.9 9.1 625 59.7 31.3
-9.4379 49.5401 6.2 10.3 31.8 9.1 625 59.4 31.4
-9.4178 49.5401 6.2 10.3 31.8 9.2 625 59.3 31.5
-9.3978 49.5401 6.2 10.3 31.8 9.2 625 59.3 31.7
-9.3778 49.5401 6.2 10.3 31.8 9.2 612 59.8 32.5
-9.3577 49.5401 6.2 10.3 31.7 9.2 606 60.4 33.6
-9.3377 49.5401 6.2 10.3 31.7 9.2 606 61.1 34.6
-9.3177 49.5401 6.2 10.3 31.7 9.2 606 61.1 34.1
-9.2977 49.5401 6.2 10.3 31.7 9.2 606 61.1 33.7
-9.2776 49.5401 6.2 10.3 31.6 9.2 606 60.9 33.2
-9.2576 49.5401 6.2 10.3 31.6 9.2 606 60.1 32.7
-9.2376 49.5401 6.2 10.3 31.6 9.2 606 59.3 32.2
-9.2175 49.5401 6.2 10.3 31.6 9.2 606 59 32
-9.1975 49.5401 6.2 10.3 31.6 9.2 606 59 32
-9.1775 49.5401 6.2 10.3 31.6 9.2 606 59 32
-9.1574 49.5401 6.2 10.3 31.7 9.2 606 59.5 32.1
-9.1374 49.5401 6.2 10.3 31.7 9.2 606 60.2 32.4
-9.1174 49.5401 6.2 10.3 31.7 9.2 606 60.7 32.6
-9.0973 49.5401 6.2 10.3 31.7 9.2 606 60.7 32.6
-9.0773 49.5401 6.2 10.3 31.7 9.1 606 60.7 32.6
-9.0573 49.5401 6.2 10.3 31.6 9.1 606 60.7 32.2
-9.0372 49.5401 6.2 10.3 31.6 9.1 606 60.6 31.5
-9.0172 49.5401 6.2 10.3 31.6 9.1 606 60.6 30.7
-8.9972 49.5401 6.2 10.3 31.5 9.1 606 60.6 30.1
-8.9772 49.5401 6.2 10.3 31.5 9 606 60.6 29.9
-8.9571 49.5401 6.2 10.3 31.4 9 606 60.5 29.6
-8.9371 49.5401 6.1 10.3 31.3 9 606 60.5 29.6
-8.9171 49.5401 6.1 10.3 31.3 9 606 60.5 29.6
-8.897 49.5401 6.1 10.3 31.2 8.9 606 60.5 29.6
-8.877 49.5401 6.1 10.3 31.1 8.9 606 60.5 29.8
-8.857 49.5401 6.1 10.3 31.1 8.9 606 60.5 29.9
-8.8369 49.5401 6.1 10.3 30.9 8.8 606 60.5 30
-8.8169 49.5401 6.1 10.3 30.9 8.9 606 60.5 30
-8.7969 49.5401 6.1 10.3 31 8.9 606 60.5 30
-8.7768 49.5401 6.1 10.3 31 9 606 60.4 30.1
-8.7568 49.5401 6.1 10.3 31 9.1 606 60.4 30.3
-8.7368 49.5401 6.1 10.3 31 9.1 606 60.4 30.4
-8.7167 49.5401 6.1 10.2 31 9.2 606 60.2 30.9
-8.6967 49.5401 6.1 10.2 31 9.2 606 60.2 31.6
-8.6767 49.5401 6.1 10.2 31 9.3 600 60.2 32.3
-8.6567 49.5401 6.1 10.2 31 9.3 600 60 33.6
-8.6366 49.5401 6.1 10.2 31 9.3 600 59.9 35.2
-8.6166 49.5401 6.1 10.2 31 9.3 600 59.9 36.7
-8.5966 49.5401 6.1 10.2 30.9 9.3 600 59.8 38.1
-8.5765 49.5401 6.1 10.2 30.9 9.3 600 59.7 39.4
-8.5565 49.5401 6.1 10.2 30.9 9.3 600 59.7 41.2
-8.5365 49.5401 6.1 10.2 30.8 9.3 600 59.6 44.5
-8.5164 49.5401 6.1 10.2 30.8 9.3 600 59.5 47.8
-8.4964 49.5401 6.1 10.2 30.7 9.2 600 59.5 51.6
-8.4764 49.5401 6.1 10.2 30.7 9.2 600 59.3 56.2
-8.4563 49.5401 6.1 10.2 30.6 9.2 600 59.1 60.5
-8.4363 49.5401 6.1 10.2 30.5 9.1 600 59 64.7
-8.4163 49.5401 6.1 10.2 30.5 9.2 587 59 69.1
-8.3962 49.5401 6.1 10.2 30.5 9.2 581 59 73
-8.3762 49.5401 6.1 10.2 30.5 9.3 581 59.4 71.3
-8.3562 49.5401 6.1 10.2 30.6 9.4 581 59.6 69.6
-8.3362 49.5401 6.1 10.2 30.6 9.5 581 59.8 68.4
-8.3161 49.5401 6.1 10.2 30.6 9.6 581 60 66.2
-8.2961 49.5401 6.1 10.2 30.7 9.7 581 60.1 63.1
-8.2761 49.5401 6.1 10.2 30.7 9.8 581 60.1 61.4
-8.256 49.5401 6.1 10.2 30.6 9.7 581 60.1 60.3
-8.236 49.5401 6.1 10.2 30.6 9.7 581 60.2 59.1
-8.216 49.5401 6.1 10.2 30.5 9.6 581 60.2 57.5
-8.1959 49.5401 6.1 10.2 30.4 9.6 581 60.2 56.3
-8.1759 49.5401 6.1 10.2 30.4 9.5 581 60.2 54.9
-8.1559 49.5401 6.1 10.2 30.3 9.5 581 60.2 53.9
-8.1358 49.5401 6.1 10.2 30.3 9.5 582 60.2 53.3
-8.1158 49.5401 6.1 10.2 30.3 9.5 600 60.2 52.4
-8.0958 49.5401 6.1 10.2 30.2 9.4 600 60.1 51.1
-8.0757 49.5401 6.1 10.2 30.2 9.4 600 60 49.6
-8.0557 49.5401 6.1 10.2 30.2 9.4 600 59.7 48.3
-8.0357 49.5401 6.1 10.2 30.2 9.4 600 58.9 47
-8.0156 49.5401 6.1 10.2 30.2 9.3 600 58.3 45.7
-7.9956 49.5401 6.1 10.2 30.2 9.3 600 58 45.3
-7.9756 49.5401 6.1 10.2 30.1 9.3 600 58 45.7
-7.9556 49.5401 6.1 10.2 30.1 9.3 600 58.2 46
-7.9355 49.5401 6.1 10.2 30 9.2 600 60.5 47.1
-7.9155 49.5401 6.1 10.2 29.9 9.2 600 63.7 48.5
-7.8955 49.5401 6.1 10.2 29.9 9.2 600 66.1 49.6
-7.8754 49.5401 6.1 10.2 29.8 9.2 600 66.1 50
-7.8554 49.5401 6.1 10.2 29.7 9.2 600 65.2 50.2
-7.8354 49.5401 6.1 10.2 29.7 9.2 606 64.6 50.6
-7.8153 49.5401 6.1 10.2 29.7 9.2 606 64.3 51.3
-7.7953 49.5401 6.1 10.2 29.7 9.2 606 63.9 52.2
-7.7753 49.5401 6.1 10.2 29.6 9.2 606 63.7 52.8
-7.7552 49.5401 6.1 10.2 29.6 9.2 606 63.6 53.1
-7.7352 49.5401 6.1 10.2 29.5 9.2 606 63.5 53.5
-7.7152 49.5401 6.1 10.2 29.6 9.2 606 63.4 54.6
-7.6951 49.5401 6.1 10.2 29.6 9.3 606 63.2 56.4
-7.6751 49.5401 6.1 10.2 29.6 9.3 606 63.1 58.2
-7.6551 49.5401 6.1 10.2 29.7 9.3 606 63.1 58.6
-7.6351 49.5401 6.1 10.2 29.7 9.4 606 63 58.4
-7.615 49.5401 6.1 10.2 29.8 9.4 606 63 58.5
-7.595 49.5401 6.1 10.2 29.8 9.4 606 63 59.5
-7.575 49.5401 6.1 10.2 29.9 9.5 600 62.9 60.6
-7.5549 49.5401 6.1 10.2 29.9 9.5 600 62.9 62.1
-7.5349 49.5401 6.1 10.2 29.9 9.5 600 62.9 64.2
-7.5149 49.5401 6.1 10.2 29.9 9.6 600 62.8 66.4
-7.4948 49.5401 6.1 10.2 29.9 9.6 600 62.8 68.5
-7.4748 49.5401 6.1 10.2 30 9.6 600 62.8 70.4
-7.4548 49.5401 6.1 10.2 30 9.7 600 62.8 72.4
-7.4347 49.5401 6.1 10.2 30 9.7 600 62.8 73.6
-7.4147 49.5401 6.1 10.2 29.9 9.7 600 62.9 74.5
-7.3947 49.5401 6.1 10.2 29.9 9.6 600 62.9 74.7
-7.3746 49.5401 6.1 10.2 29.8 9.6 600 62.9 73.4
-7.3546 49.5401 6.1 10.2 29.8 9.5 600 63 71.5
-7.3346 49.5401 6.1 10.2 29.7 9.5 600 63 70.1
-7.3146 49.5401 6.1 10.2 29.6 9.4 600 63 70
-7.2945 49.5401 6.1 10.2 29.6 9.4 600 63.1 70
-7.2745 49.5401 6.1 10.2 29.5 9.3 600 63.1 69.3
-7.2545 49.5401 6.1 10.2 29.5 9.3 600 63.2 68
-7.2344 49.5401 6 10.2 29.4 9.3 600 63.3 66.7
-7.2144 49.5401 6 10.2 29.4 9.3 600 63.4 64.9
-7.1944 49.5401 6 10.2 29.3 9.2 600 63.5 62.8
-7.1743 49.5401 6 10.2 29.3 9.2 600 63.6 60.6
-7.1543 49.5401 6 10.2 29.2 9.1 600 63.7 57.7
-7.1343 49.5401 6 10.3 29 8.9 600 63.7 54.5
-7.1142 49.5401 6 10.3 28.8 8.8 600 63.8 51.4
-7.0942 49.5401 6 10.3 28.7 8.6 600 63.9 48.3
-7.0742 49.5401 6 10.3 28.5 8.5 600 64.1 45.1
-7.0541 49.5401 6.1 10.3 28.4 8.4 600 64.2 42.2
-7.0341 49.5401 6.1 10.3 28.2 8.2 605 64.3 39.5
-7.0141 49.5401 6.1 10.4 28.1 8.1 650 64.4 36.8
-6.9941 49.5401 6.1 10.4 28 8 650 64.5 34.8
-6.974 49.5401 6.1 10.4 27.9 7.9 650 64.6 33.2
-6.954 49.5401 6.1 10.4 27.8 7.7 650 64.7 31.7
-6.934 49.5401 6.1 10.4 27.7 7.6 650 64.9 30.6
-6.9139 49.5401 6.1 10.4 27.6 7.5 650 65 29.7
-6.8939 49.5401 6.1 10.4 27.5 7.4 650 65.1 29.1
-6.8739 49.5401 6.1 10.4 27.6 7.4 650 65.2 29.1
-6.8538 49.5401 6.1 10.4 27.7 7.5 650 65.3 29.3
-6.8338 49.5401 6.1 10.4 27.8 7.6 650 65.3 29.5
-6.8138 49.5401 6.1 10.4 28 7.7 650 65.4 29.8
-6.7937 49.5401 6.1 10.4 28.1 7.8 650 65.5 30.1
-6.7737 49.5401 6.1 10.4 28.3 7.9 650 65.6 30.7
-6.7537 49.5401 6.1 10.4 28.4 7.9 635 65.7 31.4
-6.7336 49.5401 6.1 10.4 28.5 8 625 65.8 32.1
-6.7136 49.5401 6.1 10.4 28.6 8 625 66.1 33
-6.6936 49.5401 6.1 10.4 28.7 8.1 625 66.2 33.8
-6.6736 49.5401 6.1 10.4 28.8 8.2 625 66.5 34.5
-6.6535 49.5401 6.1 10.3 28.9 8.2 625 66.7 35.3
-6.6335 49.5401 6.1 10.3 29 8.3 625 66.8 36
-6.6135 49.5401 6.1 10.3 29.1 8.3 625 67 36.5
-6.5934 49.5401 6.1 10.3 29.1 8.3 625 67.3 36.8
-6.5734 49.5401 6.1 10.3 29.1 8.2 625 67.7 37
-6.5534 49.5401 6.1 10.3 29.1 8.2 625 66 36.1
-6.5333 49.5401 6.1 10.3 29.1 8.2 625 62.7 34.2
-6.5133 49.5401 6.1 10.3 29.1 8.1 625 59.5 32.2
-6.4933 49.5401 6.1 10.3 29.1 8.1 625 59.6 31.1
-6.4732 49.5401 6.1 10.3 29.1 8.1 625 60 30
-6.4532 49.5401 6.1 10.3 29.1 8 625 60.3 29.1
-6.4332 49.5401 6.1 10.3 29.1 8 625 60.6 28.5
-6.4131 49.5401 6.1 10.3 29.1 7.9 625 60.8 27.8
-6.3931 49.5401 6.1 10.3 29 7.9 625 61.2 27.3
-6.3731 49.5401 6.1 10.3 29 7.8 625 61.6 27
-6.3531 49.5401 6.1 10.3 29 7.8 625 61.7 26.4
-6.333 49.5401 6.1 10.3 29 7.7 625 60.4 25.5
-6.313 49.5401 6.1 10.4 29 7.7 625 60.6 25.1
-6.293 49.5401 6.1 10.4 29 7.6 625 60.8 24.7
-6.2729 49.5401 6.1 10.4 28.9 7.6 625 61 24.2
-6.2529 49.5401 6.1 10.4 28.9 7.5 625 61.2 23.8
-6.2329 49.5401 6.1 10.4 28.9 7.5 625 61.5 23.3
-6.2128 49.5401 6.1 10.4 28.8 7.4 625 61.6 22.8
-6.1928 49.5401 6.1 10.4 28.7 7.3 641 61.7 22.2
-6.1728 49.5401 6.1 10.4 28.7 7.2 650 61.9 21.7
-6.1527 49.5401 6.1 10.4 28.6 7.2 650 62.1 21.2
-6.1327 49.5401 6.1 10.4 28.5 7.1 650 62.2 20.8
-6.1127 49.5401 6.1 10.4 28.5 7 650 62 20.4
-6.0926 49.5401 6.1 10.4 28.4 6.9 650 61.5 20.1
-6.0726 49.5401 6.1 10.4 28.3 6.8 650 61.2 19.7
-6.0526 49.5401 6.1 10.4 28.3 6.8 650 61.3 19.7
-6.0326 49.5401 6.1 10.4 28.2 6.8 650 61.3 19.7
-6.0125 49.5401 6.1 10.4 28.2 6.8 650 61.4 19.8
-5.9925 49.5401 6.1 10.4 28.2 6.7 650 61.5 19.8
-5.9725 49.5401 6.1 10.4 28.1 6.7 650 61.5 19.8
-5.9524 49.5401 6.1 10.4 28.1 6.7 650 61.1 19.6
-5.9324 49.5401 6.1 10.4 28.1 6.7 643 61.1 19.6
-5.9124 49.5401 6.1 10.4 28.1 6.7 600 61.1 19.6
-5.8923 49.5401 6.1 10.4 28.1 6.8 600 61.2 19.6
-5.8723 49.5401 6.1 10.4 28.1 6.8 600 61.3 19.6
-5.8523 49.5401 6.1 10.4 28.1 6.8 600 61.4 19.6
-5.8322 49.5401 6.1 10.4 28.1 6.8 600 61.5 19.7
-5.8122 49.5401 6.1 10.4 28.1 6.9 600 61.5 19.7
-5.7922 49.5401 6.1 10.4 28.1 6.9 600 61.6 19.7
-5.7721 49.5401 6.1 10.4 28.1 6.9 600 61.6 19.7
-5.7521 49.5401 6.1 10.4 28.1 6.9 600 61.7 19.7
-5.7321 49.5401 6.1 10.4 27.9 6.8 600 61.7 19.7
-5.7121 49.5401 6.1 10.4 27.9 6.8 600 61.8 19.7
-5.692 49.5401 6.1 10.4 27.8 6.7 600 61.9 19.5
-5.672 49.5401 6.1 10.4 27.8 6.7 600 62 19.5
-5.652 49.5401 6.1 10.4 27.8 6.7 583 62.1 19.4
-5.6319 49.5401 6.1 10.4 27.7 6.7 575 62.2 19.5
-5.6119 49.5401 6.1 10.4 27.7 6.7 575 62.3 19.6
-5.5919 49.5401 6.1 10.4 27.6 6.7 575 62.4 19.6
-5.5718 49.5401 6.1 10.4 27.6 6.7 575 62.4 19.7
-5.5518 49.5401 6.1 10.4 27.5 6.7 575 62.3 19.8
-5.5318 49.5401 6.1 10.4 27.5 6.7 575 62 19.8
-5.5117 49.5401 6.1 10.4 27.5 6.7 575 61.7 19.8
-5.4917 49.5401 6.1 10.4 27.4 6.7 575 61.6 19.9
-5.4717 49.5401 6.1 10.4 27.4 6.7 575 61.7 20
-5.4516 49.5401 6.1 10.4 27.4 6.7 575 61.7 20.3
-5.4316 49.5401 6.1 10.4 27.4 6.7 575 61.8 20.1
-5.4116 49.5401 6.1 10.4 27.3 6.7 575 61.8 19.8
-5.3915 49.5401 6.1 10.4 27.3 6.6 575 61.8 19.6
-5.3715 49.5401 6.1 10.4 27.3 6.6 570 61.6 19.4
-5.3515 49.5401 6.1 10.4 27.2 6.6 550 61.4 19.2
-5.3315 49.5401 6.1 10.4 27.2 6.6 550 61.4 19
-5.3114 49.5401 6.1 10.4 27.2 6.6 550 61.4 18.9
-5.2914 49.5401 6.1 10.4 27.1 6.5 550 61.4 18.8
-5.2714 49.5401 6.1 10.4 27.1 6.5 550 61.5 18.7
-5.2513 49.5401 6.1 10.4 27.1 6.5 550 61.6 18.6
-5.2313 49.5401 6.1 10.4 27 6.5 550 61.6 18.4
-5.2113 49.5401 6.1 10.4 27 6.4 550 61.8 18.3
-5.1912 49.5401 6.1 10.4 26.8 6.3 550 61.9 18.4
-5.1712 49.5401 6.1 10.4 26.8 6.3 550 62 18.4
-5.1512 49.5401 6.1 10.4 26.7 6.3 550 62.4 18.2
-5.1311 49.5401 6.1 10.4 26.7 6.2 550 62.7 17.9
-5.1111 49.5401 6.1 10.4 26.6 6.2 550 63 17.7
-5.0911 49.5401 6.1 10.3 26.5 6.2 532 63 17.6
-5.071 49.5401 6.1 10.3 26.4 6.1 525 63.1 17.5
-5.051 49.5401 6.1 10.3 26.4 6.1 525 63.2 17.4
-5.031 49.5401 6.1 10.3 26.3 6 525 63.4 17.3
-5.011 49.5401 6.1 10.3 26.2 6 525 63.4 17.3
-4.9909 49.5401 6.1 10.3 26.2 6 525 63.8 17.3
-4.9709 49.5401 6.1 10.3 26.1 5.9 525 64.3 17.3
-4.9509 49.5401 6.2 10.3 26 5.9 525 64.8 17.3
-4.9308 49.5401 6.2 10.3 26 5.9 525 64.9 17.3
-4.9108 49.5401 6.2 10.3 25.9 5.9 525 65 17.4
-4.8908 49.5401 6.2 10.3 25.8 5.9 525 65.1 17.4
-4.8707 49.5401 6.2 10.3 25.7 5.9 525 65.2 17.1
-4.8507 49.5401 6.2 10.3 25.7 5.8 525 65.2 16.8
-4.8307 49.5401 6.2 10.3 25.6 5.8 525 65.3 16.6
-4.8106 49.5401 6.2 10.3 25.5 5.7 525 65.4 16.6
-4.7906 49.5401 6.2 10.3 25.4 5.7 525 65.4 16.5
-4.7706 49.5401 6.2 10.3 25.3 5.6 525 65.5 16.4
-4.7505 49.5401 6.2 10.3 25.2 5.6 525 65.5 16.5
-4.7305 49.5401 6.2 10.3 25.1 5.5 525 65.7 16.5
-4.7105 49.5401 6.2 10.3 25 5.5 525 65.8 16.6
-4.6905 49.5401 6.2 10.3 24.9 5.4 525 65.8 16.7
-4.6704 49.5401 6.2 10.3 24.8 5.4 525 65.9 16.9
-4.6504 49.5401 6.2 10.3 24.7 5.4 525 66 17.5
-4.6304 49.5401 6.2 10.3 24.6 5.5 525 66.1 18.1
-4.6103 49.5401 6.2 10.3 24.5 5.5 525 66.2 18.2
-4.5903 49.5401 6.2 10.3 24.4 5.5 525 66.3 17.8
-4.5703 49.5401 6.2 10.3 24.4 5.4 525 66.4 17.6
-4.5502 49.5401 6.2 10.3 24.3 5.4 525 66.5 17.7
-4.5302 49.5401 6.2 10.3 24.2 5.4 506 66.6 17.9
-4.5102 49.5401 6.2 10.3 24.1 5.4 500 66.7 18
-4.4901 49.5401 6.2 10.3 24 5.4 500 66.5 18.1
-4.4701 49.5401 6.2 10.3 24 5.4 500 66.2 18.2
-4.4501 49.5401 6.2 10.3 23.9 5.4 500 66.1 18.4
-4.43 49.5401 6.2 10.3 23.8 5.4 500 66.2 18.6
-4.41 49.5401 6.2 10.3 23.7 5.4 500 66.1 18.8
-4.39 49.5401 6.2 10.3 23.7 5.4 500 65.9 19
-4.37 49.5401 6.2 10.3 23.7 5.5 500 66 19.2
-4.3499 49.5401 6.2 10.2 23.7 5.5 500 66.1 19.5
-4.3299 49.5401 6.2 10.2 23.6 5.5 500 66.1 19.7
-4.3099 49.5401 6.2 10.2 23.6 5.6 500 66.1 20.1
-4.2898 49.5401 6.2 10.2 23.5 5.6 500 66.2 20.4
-4.2698 49.5401 6.2 10.2 23.5 5.6 489 66.2 20.8
-4.2498 49.5401 6.2 10.2 23.5 5.6 450 66.3 21.1
-4.2297 49.5401 6.2 10.2 23.4 5.6 450 66.4 21.4
-4.2097 49.5401 6.3 10.2 23.4 5.6 450 66.8 21.9
-4.1897 49.5401 6.3 10.2 23.3 5.6 450 66.9 22.2
-4.1696 49.5401 6.3 10.2 23.3 5.6 450 67 22.6
-4.1496 49.5401 6.3 10.1 23.2 5.7 450 67.1 22.9
-4.1296 49.5401 6.3 10.1 23.2 5.7 450 67.5 23.1
-4.1095 49.5401 6.3 10.1 23.2 5.7 450 67.8 23.3
-4.0895 49.5401 6.3 10.1 23.2 5.7 450 67.8 23.3
-4.0695 49.5401 6.3 10.1 23.2 5.7 450 67.8 23.3
-4.0495 49.5401 6.3 10 23.2 5.7 450 67.8 23.2
-4.0294 49.5401 6.3 10 23.3 5.7 450 67.8 23.1
-4.0094 49.5401 6.3 10 23.3 5.7 450 67.7 22.9
-3.9894 49.5401 6.3 9.9 23.3 5.7 376 67.7 22.8
-3.9693 49.5401 6.3 9.9 23.3 5.7 350 67.7 22.6
-3.9493 49.5401 6.3 9.9 23.3 5.6 350 67.7 22.5
-3.9293 49.5401 6.4 9.8 23.3 5.6 350 67.6 22.3
-3.9092 49.5401 6.4 9.8 23.4 5.6 350 67.6 22.2
-3.8892 49.5401 6.4 9.8 23.4 5.6 350 67.6 22.2
-3.8692 49.5401 6.4 9.8 23.4 5.6 350 67.6 22.1
-3.8491 49.5401 6.4 9.7 23.4 5.6 350 67.5 22.1
-3.8291 49.5401 6.4 9.7 23.3 5.5 350 67.6 22
-3.8091 49.5401 6.4 9.7 23.3 5.5 350 67.6 22.1
-3.789 49.5401 6.4 9.7 23.3 5.5 350 67.5 22.1
-3.769 49.5401 6.4 9.7 23.3 5.5 350 67.5 22.1
-3.749 49.5401 6.4 9.6 23.3 5.5 350 67.4 22
-3.729 49.5401 6.4 9.6 23.3 5.5 350 67.4 22
-3.7089 49.5401 6.4 9.6 23.2 5.5 330 67.4 22
-3.6889 49.5401 6.5 9.6 23.2 5.5 275 67.3 22
-3.6689 49.5401 6.5 9.5 23.2 5.5 275 67.5 22
-3.6488 49.5401 6.5 9.5 23.2 5.5 275 68.2 22.1
-3.6288 49.5401 6.5 9.5 23.2 5.5 275 68.8 22.1
-3.6088 49.5401 6.5 9.5 23.2 5.5 275 68.9 22.1
-3.5887 49.5401 6.5 9.4 23.2 5.5 275 68.9 22
-3.5687 49.5401 6.5 9.4 23.2 5.4 275 69 21.9
-3.5487 49.5401 6.5 9.4 23.1 5.4 275 69.3 22
-3.5286 49.5401 6.5 9.4 23.1 5.4 275 69.2 22
-3.5086 49.5401 6.5 9.4 23 5.4 275 69.2 22.2
-3.4886 49.5401 6.5 9.4 23 5.4 275 69 22.3
-3.4685 49.5401 6.5 9.4 22.9 5.4 275 69 22.2
-3.4485 49.5401 6.5 9.4 22.8 5.4 275 68.9 22
-3.4285 49.5401 6.5 9.4 22.8 5.3 275 68.7 22
-3.4085 49.5401 6.5 9.4 22.7 5.3 275 68.6 22.1
-3.3884 49.5401 6.5 9.4 22.7 5.3 275 68.3 22.2
-3.3684 49.5401 6.5 9.4 22.6 5.3 275 67.8 22.1
-3.3484 49.5401 6.5 9.4 22.5 5.3 275 67.6 22.2
-3.3283 49.5401 6.5 9.4 22.5 5.3 275 69.5 22.7
-3.3083 49.5401 6.5 9.4 22.4 5.2 275 71.9 23.3
-3.2883 49.5401 6.5 9.4 22.4 5.2 275 72 23.2
-3.2682 49.5401 6.5 9.5 22.2 5.2 275 71.1 23
-3.2482 49.5401 6.5 9.5 22.1 5.1 275 72.7 23.6
-3.2282 49.5401 6.5 9.5 22 5.1 275 76.1 24.8
-3.2081 49.5401 6.5 9.5 21.8 5 275 76.4 24.8
-3.1881 49.5401 6.5 9.6 21.7 5 275 75.9 24.2
-3.1681 49.5401 6.5 9.6 21.5 5 295 75.5 23.8
-3.148 49.5401 6.5 9.6 21.4 4.9 350 75.4 23.6
-3.128 49.5401 6.5 9.7 21.2 4.9 350 75.2 23.6
-3.108 49.5401 6.5 9.7 21.1 4.8 350 75.2 23.6
-3.0879 49.5401 6.5 9.7 21 4.8 350 75.2 23.7
-3.0679 49.5401 6.5 9.7 20.8 4.7 350 75.2 23.8
-3.0479 49.5401 6.5 9.8 20.7 4.7 350 75.2 24.1
-3.0279 49.5401 6.5 9.8 20.6 4.7 350 75.2 24.3
-3.0078 49.5401 6.5 9.7 20.6 4.7 350 75.3 24.7
-2.9878 49.5401 6.5 9.7 20.7 4.8 350 75.3 25.4
-2.9678 49.5401 6.5 9.7 20.7 4.8 350 75.4 26.4
-2.9477 49.5401 6.5 9.7 20.7 4.9 350 75.4 27.4
-2.9277 49.5401 6.5 9.7 20.7 4.9 350 75.5 27.6
-2.9077 49.5401 6.5 9.6 20.7 5 350 75.5 27.7
-2.8876 49.5401 6.5 9.6 20.7 5 310 75.6 28.1
-2.8676 49.5401 6.5 9.6 20.7 5.1 300 75.8 28.9
-2.8476 49.5401 6.5 9.6 20.7 5.1 300 76 29.8
-2.8275 49.5401 6.5 9.6 20.7 5.2 300 76.2 30.7
-2.8075 49.5401 6.5 9.5 20.8 5.2 300 76.6 31.6
-2.7875 49.5401 6.5 9.5 20.8 5.3 300 76.9 32.5
-2.7674 49.5401 6.5 9.5 20.8 5.3 300 78 33.2
-2.7474 49.5401 6.5 9.5 20.7 5.3 300 79.2 33.8
-2.7274 49.5401 6.5 9.5 20.7 5.3 300 77.9 33.5
-2.7074 49.5401 6.5 9.5 20.7 5.3 300 70.5 30.5
-2.6873 49.5401 6.5 9.5 20.7 5.3 300 63.1 27.3
-2.6673 49.5401 6.5 9.5 20.7 5.3 300 62.3 26.8
-2.6473 49.5401 6.5 9.5 20.7 5.3 300 64 27.1
-2.6272 49.5401 6.5 9.5 20.7 5.3 300 66 27.2
-2.6072 49.5401 6.5 9.5 20.8 5.3 300 68 27.2
-2.5872 49.5401 6.5 9.5 20.8 5.3 300 68.6 27.1
-2.5671 49.5401 6.5 9.5 20.8 5.3 300 64.1 25.3
-2.5471 49.5401 6.5 9.5 20.8 5.2 300 60.3 23.7
-2.5271 49.5401 6.5 9.5 20.8 5.2 300 60.8 23.6
-2.507 49.5401 6.5 9.5 20.8 5.2 300 61.7 23.8
-2.487 49.5401 6.5 9.5 20.8 5.2 300 61.8 23.8
-2.467 49.5401 6.5 9.5 20.8 5.3 300 61.8 23.8
-2.4469 49.5401 6.5 9.5 20.9 5.3 300 61.7 23.8
-2.4269 49.5401 6.5 9.4 20.9 5.3 300 60.5 23.8
-2.4069 49.5401 6.5 9.4 20.9 5.3 300 59.8 23.8
-2.3869 49.5401 6.5 9.4 21 5.4 300 63.8 25.3
-2.3668 49.5401 6.5 9.4 21 5.4 300 67.1 26.4
-2.3468 49.5401 6.5 9.4 21 5.4 300 65.4 25.7
-2.3268 49.5401 6.5 9.3 21.1 5.4 279 62.5 25.2
-2.3067 49.5401 6.5 9.3 21.1 5.5 275 71.2 28.7
-2.2867 49.5401 6.5 9.3 21.1 5.5 275 81.7 32.9
-2.2667 49.5401 6.5 9.3 21.2 5.5 275 82.6 33.4
-2.2466 49.5401 6.5 9.3 21.2 5.5 275 72.5 29.8
-2.2266 49.5401 6.5 9.3 21.2 5.5 275 62 26
-2.2066 49.5401 6.5 9.3 21.2 5.5 275 59.5 25.1
-2.1865 49.5401 6.5 9.3 21.1 5.5 275 62.1 26.2
-2.1665 49.5401 6.5 9.3 21.1 5.5 275 64.5 27.1
-2.1465 49.5401 6.5 9.3 21 5.5 275 65.5 27.4
-2.1264 49.5401 6.5 9.3 21 5.5 275 66.4 27.6
-2.1064 49.5401 6.5 9.3 21 5.4 275 67 27.7
-2.0864 49.5401 6.5 9.3 20.9 5.4 275 67.5 27.8
-2.0664 49.5401 6.5 9.3 20.9 5.4 283 68.1 27.9
-2.0463 49.5401 6.5 9.3 20.8 5.3 300 68.4 27.7
-2.0263 49.5401 6.5 9.3 20.8 5.3 300 68.5 27.4
-2.0063 49.5401 6.5 9.3 20.7 5.3 300 68.7 27.3
-1.9862 49.5401 6.5 9.2 20.7 5.3 300 68.4 27.1
-1.9662 49.5401 6.5 9.2 20.7 5.3 300 67.9 26.8
-1.9462 49.5401 6.5 9.2 20.7 5.3 300 68.6 27
-1.9261 49.5401 6.5 9.2 20.7 5.3 300 71.6 27.8
-1.9061 49.5401 6.5 9.2 20.7 5.4 300 75 28.8
-1.8861 49.5401 6.5 9.2 20.7 5.4 300 76.6 29.6
-1.866 49.5401 6.5 9.2 20.7 5.4 300 76.2 30
-1.846 49.5401 6.5 9.2 20.7 5.4 300 75.4 30.4
-1.826 49.5401 6.5 9.2 20.7 5.5 300 74.9 30.8
-1.8059 49.5401 6.5 9.2 20.7 5.5 300 74.6 31.2
-1.7859 49.5401 6.5 9.2 20.7 5.5 300 74.3 31.4
-1.7659 49.5401 6.5 9.2 20.7 5.5 322 74.2 31.7
-1.7459 49.5401 6.5 9.2 20.7 5.5 325 74 32
-1.7258 49.5401 6.5 9.2 20.7 5.5 325 73.9 32.2
-1.7058 49.5401 6.5 9.2 20.7 5.5 325 73.9 32.3
-1.6858 49.5401 6.5 9.2 20.6 5.5 325 73.8 32.3
-1.6657 49.5401 6.5 9.2 20.6 5.5 325 73.8 32.3
-1.6457 49.5401 6.5 9.2 20.6 5.5 325 73.8 32.3
-1.6257 49.5401 6.5 9.2 20.6 5.5 325 73.7 32.2
-1.6056 49.5401 6.5 9.2 20.7 5.5 325 73.7 32.2
-1.5856 49.5401 6.5 9.2 20.7 5.5 325 73.7 32.3
-1.5656 49.5401 6.5 9.2 20.7 5.5 325 73.6 32.4
-1.5455 49.5401 6.5 9.2 20.8 5.6 325 73.6 32.2
-1.5255 49.5401 6.5 9.2 20.8 5.6 325 73.6 32
-1.5055 49.5401 6.5 9.2 20.8 5.6 334 73.5 31.7
-1.4854 49.5401 6.5 9.2 20.8 5.6 350 73.5 31.4
-1.4654 49.5401 6.5 9.2 20.8 5.6 350 73.4 31.3
-1.4454 49.5401 6.5 9.2 20.8 5.5 350 73.3 31.1
-1.4254 49.5401 6.5 9.2 20.8 5.5 356 73.3 30.9
-1.4053 49.5401 6.5 9.3 20.8 5.5 356 73.3 30.7
-1.3853 49.5401 6.5 9.3 20.8 5.5 364 73.2 30.7
-1.3653 49.5401 6.5 9.3 20.9 5.5 375 73.2 30.7
-1.3452 49.5401 6.4 9.3 20.9 5.5 375 73.1 30.7
-1.3252 49.5401 6.4 9.3 21 5.5 375 73.1 30.6
-1.3052 49.5401 6.4 9.3 21 5.5 375 73.1 30.7
-1.2851 49.5401 6.4 9.3 21.1 5.6 375 73.1 30.9
-1.2651 49.5401 6.4 9.4 21.2 5.6 375 73.1 30.7
-1.2451 49.5401 6.4 9.4 21.2 5.6 375 73.2 30.5
-1.225 49.5401 6.4 9.4 21.4 5.6 375 73.3 30
-1.205 49.5401 6.4 9.4 21.5 5.6 443 73.4 29.9
-1.185 49.5401 6.4 9.4 21.6 5.7 450 73.8 29.8
-1.1649 49.5401 6.4 9.4 21.7 5.7 450 74.4 29.6
-1.1449 49.5401 6.4 9.5 21.8 5.7 450 74.3 29.2
-1.1249 49.5401 6.4 9.5 21.9 5.7 450 71.5 28
-1.1049 49.5401 6.4 9.5 22 5.7 450 67.3 26.5
-1.0848 49.5401 6.4 9.5 22.1 5.7 450 65 25.6
-1.0648 49.5401 6.4 9.5 22.2 5.8 450 65.2 25.4
-1.0448 49.5401 6.4 9.6 22.4 5.8 450 65.6 25.3
-1.0247 49.5401 6.4 9.6 22.5 5.8 450 65.8 25.3
-1.0047 49.5401 6.4 9.6 22.6 5.8 450 65.9 25.2
-0.9847 49.5401 6.4 9.7 22.7 5.8 450 66.1 24.9
-0.9646 49.5401 6.4 9.7 22.9 5.8 450 66.1 24.5
-0.9446 49.5401 6.4 9.6 23.1 5.9 460 66.2 24.1
-0.9246 49.5401 6.4 9.6 23.2 5.9 475 66.1 23.7
-0.9045 49.5401 6.4 9.6 23.3 5.9 475 66.1 23.5
-0.8845 49.5401 6.4 9.6 23.5 6 475 66 23.2
-0.8645 49.5401 6.4 9.6 23.6 6 475 65.9 22.9
-0.8444 49.5401 6.4 9.6 23.8 6 475 65.7 22.6
-0.8244 49.5401 6.4 9.6 23.9 6.1 475 65.5 22.4
-0.8044 49.5401 6.4 9.6 24.1 6.1 475 65.3 22.3
-0.7844 49.5401 6.4 9.6 24.2 6.1 475 65 22
-0.7643 49.5401 6.4 9.6 24.3 6.2 475 64.5 22
-0.7443 49.5401 6.4 9.6 24.4 6.2 475 64.2 21.9
-0.7243 49.5401 6.4 9.6 24.5 6.2 475 63.4 21.8
-0.7042 49.5401 6.4 9.6 24.5 6.2 475 62.9 21.5
-0.6842 49.5401 6.4 9.6 24.6 6.3 475 62.6 21.3
-0.6642 49.5401 6.4 9.7 24.7 6.3 521 62.1 21.1
-0.6441 49.5401 6.4 9.7 24.8 6.3 525 61.7 21
-0.6241 49.5401 6.4 9.7 24.9 6.3 525 61 20.8
-0.6041 49.5401 6.4 9.7 25 6.4 525 60 20.5
-0.584 49.5401 6.4 9.7 25 6.4 525 60 20.5
-0.564 49.5401 6.4 9.7 25.1 6.4 525 70.9 23.6
-0.544 49.5401 6.4 9.7 25.2 6.4 525 76.5 25.3
-0.5239 49.5401 6.4 9.7 25.3 6.5 525 72.9 24.1
-0.5039 49.5401 6.4 9.8 25.3 6.5 525 64.5 21.5
-0.4839 49.5401 6.4 9.8 25.3 6.5 525 62.5 20.9
-0.4638 49.5401 6.4 9.8 25.4 6.5 525 63.5 21.2
-0.4438 49.5401 6.4 9.8 25.5 6.5 525 64.4 21.3
-0.4238 49.5401 6.4 9.8 25.5 6.5 525 64.5 21
-0.4038 49.5401 6.4 9.8 25.6 6.5 525 64.8 20.8
-0.3837 49.5401 6.4 9.8 25.6 6.5 536 64.9 20.7
-0.3637 49.5401 6.4 9.8 25.7 6.5 550 65 20.5
-0.3437 49.5401 6.4 9.8 25.8 6.5 550 65 20.3
-0.3236 49.5401 6.4 9.8 25.9 6.5 550 65 20.2
-0.3036 49.5401 6.4 9.8 25.9 6.6 550 65.1 20.1
-0.2836 49.5401 6.4 9.8 26 6.6 550 65.1 20
-0.2635 49.5401 6.4 9.8 26 6.6 550 65.1 19.9
-0.2435 49.5401 6.4 9.8 26.1 6.6 550 65.1 19.8
-0.2235 49.5401 6.4 9.7 26.2 6.6 550 65.1 19.7
-0.2034 49.5401 6.4 9.7 26.2 6.6 550 65 19.6
-0.1834 49.5401 6.4 9.7 26.2 6.6 550 65 19.6
-0.1634 49.5401 6.4 9.7 26.2 6.6 550 65 19.5
-0.1433 49.5401 6.4 9.7 26.2 6.6 550 65 19.4
-0.1233 49.5401 6.4 9.7 26.3 6.6 550 65 19.2
-0.1033 49.5401 6.4 9.7 26.3 6.6 574 65 19.2
-0.0833 49.5401 6.4 9.7 26.3 6.6 575 64.9 19.2
-0.0632 49.5401 6.4 9.7 26.3 6.6 575 64.9 19.2
-0.0432 49.5401 6.4 9.7 26.4 6.6 575 64.9 19.2
-0.0232 49.5401 6.4 9.7 26.4 6.6 575 64.8 19.2
-0.0031 49.5401 6.4 9.7 26.4 6.6 575 64.8 19.1
0.0169 49.5401 6.4 9.7 26.4 6.6 575 64.8 19.2
0.0369 49.5401 6.4 9.8 26.5 6.6 575 64.8 19.3
0.057 49.5401 6.4 9.8 26.5 6.7 575 64.7 19.3
0.077 49.5401 6.5 9.9 26.5 6.7 575 64.7 19.6
0.097 49.5401 6.5 10 26.6 6.7 575 64.7 20
0.1171 49.5401 6.5 10 26.7 6.7 575 64.6 20.2
0.1371 49.5401 6.5 10.1 26.7 6.8 575 64.6 20
0.1571 49.5401 6.5 10.2 26.7 6.8 575 64.5 19.6
0.1772 49.5401 6.5 10.2 26.7 6.8 575 64.5 19.6
0.1972 49.5401 6.5 10.3 26.8 6.9 575 64.5 19.7
0.2172 49.5401 6.5 10.3 26.9 6.9 575 64.4 19.8
0.2372 49.5401 6.6 10.4 26.9 6.9 575 64.4 19.9
0.2573 49.5401 6.6 10.5 26.9 6.9 575 64.4 20
0.2773 49.5401 6.6 10.5 27 6.9 575 64.3 20.1
0.2973 49.5401 6.6 10.5 27 7 575 64.3 20.2
0.3174 49.5401 6.6 10.4 27.1 7 575 64.3 20.3
0.3374 49.5401 6.5 10.3 27.1 7 575 64.2 20.3
0.3574 49.5401 6.5 10.3 27.1 7 575 64.2 20.4
0.3775 49.5401 6.5 10.2 27.2 7 575 64.2 20.5
0.3975 49.5401 6.5 10.1 27.2 7 575 64.2 20.4
0.4175 49.5401 6.5 10 27.2 7 575 64.1 20.1
0.4376 49.5401 6.5 10 27.3 7 599 64.1 19.9
0.4576 49.5401 6.5 9.9 27.3 7 600 64.1 20.1
0.4776 49.5401 6.5 9.8 27.3 7 600 64 20.4
0.4977 49.5401 6.4 9.7 27.4 7 600 64 20.3
0.5177 49.5401 6.4 9.7 27.4 7 600 64 19.9
0.5377 49.5401 6.4 9.7 27.4 7.1 600 64 19.7
0.5577 49.5401 6.4 9.7 27.5 7.1 600 64 19.7
0.5778 49.5401 6.4 9.7 27.5 7.1 600 63.9 19.9
0.5978 49.5401 6.4 9.7 27.5 7.1 600 63.9 20
0.6178 49.5401 6.4 9.7 27.6 7.2 600 63.9 20.1
0.6379 49.5401 6.4 9.7 27.6 7.2 600 63.9 20.2
0.6579 49.5401 6.4 9.6 27.6 7.2 600 63.8 20.3
0.6779 49.5401 6.4 9.6 27.7 7.2 600 63.8 20.4
0.698 49.5401 6.4 9.6 27.7 7.2 600 63.8 20.5
0.718 49.5401 6.4 9.6 27.8 7.3 600 63.8 20.6
0.738 49.5401 6.4 9.6 27.8 7.3 600 63.8 20.7
0.7581 49.5401 6.4 9.6 27.9 7.3 600 63.7 20.8
0.7781 49.5401 6.4 9.6 27.9 7.4 600 63.7 20.8
0.7981 49.5401 6.4 9.6 27.9 7.4 600 63.7 20.9
0.8182 49.5401 6.4 9.6 28 7.4 600 63.7 20.9
0.8382 49.5401 6.4 9.6 28 7.5 600 63.7 21
0.8582 49.5401 6.4 9.6 28 7.5 600 63.7 21
0.8782 49.5401 6.4 9.6 28 7.5 600 63.7 20.9
0.8983 49.5401 6.4 9.6 28 7.5 600 63.7 20.9
0.9183 49.5401 6.4 9.6 28 7.6 600 63.6 21
0.9383 49.5401 6.4 9.6 28.1 7.6 600 63.6 21
0.9584 49.5401 6.4 9.6 28.1 7.6 600 63.6 20.9
0.9784 49.5401 6.4 9.6 28.1 7.6 595 63.6 20.8
0.9984 49.5401 6.4 9.6 28.1 7.7 600 63.6 20.5
1.0185 49.5401 6.4 9.6 28.1 7.7 600 63.6 20.5
1.0385 49.5401 6.4 9.6 28 7.6 600 63.6 20.6
1.0585 49.5401 6.4 9.6 28 7.6 600 63.6 20.6
1.0786 49.5401 6.4 9.6 28 7.5 600 63.6 20.7
1.0986 49.5401 6.4 9.6 27.9 7.5 600 63.5 20.8
1.1186 49.5401 6.5 9.6 27.9 7.4 600 63.5 20.9
1.1387 49.5401 6.5 9.6 27.9 7.4 600 63.5 21.1
1.1587 49.5401 6.5 9.6 27.9 7.4 600 63.5 21.4
1.1787 49.5401 6.5 9.6 28 7.5 600 63.5 21.6
1.1987 49.5401 6.4 9.6 28 7.5 600 63.5 21.9
1.2188 49.5401 6.5 9.6 28 7.5 600 63.4 22.2
1.2388 49.5401 6.5 9.6 28.1 7.6 600 63.4 22.3
1.2588 49.5401 6.5 9.6 28.1 7.6 600 63.4 22.4
1.2789 49.5401 6.5 9.6 28.2 7.6 600 63.4 22.2
1.2989 49.5401 6.5 9.5 28.2 7.6 600 63.4 22.3
1.3189 49.5401 6.5 9.5 28.2 7.6 600 63.4 22.4
1.339 49.5401 6.5 9.5 28.2 7.6 600 63.4 22.5
1.359 49.5401 6.5 9.5 28.2 7.6 600 63.4 22.5
1.379 49.5401 6.5 9.5 28.2 7.6 600 63.4 22.4
1.3991 49.5401 6.5 9.5 28.3 7.6 600 63.4 22.3
1.4191 49.5401 6.5 9.5 28.2 7.5 600 63.3 22.3
1.4391 49.5401 6.5 9.5 28.2 7.5 600 63.3 22.3
1.4592 49.5401 6.5 9.5 28.2 7.4 600 63.3 22.4
1.4792 49.5401 6.5 9.5 28.2 7.3 600 63.3 22.6
1.4992 49.5401 6.5 9.5 28.2 7.3 600 63.3 22.7
1.5192 49.5401 6.5 9.5 28.2 7.3 600 63.3 22.2
1.5393 49.5401 6.5 9.5 28.3 7.3 600 63.3 21.6
1.5593 49.5401 6.5 9.5 28.3 7.3 600 63.3 21.1
1.5793 49.5401 6.5 9.5 28.3 7.3 600 63.3 20.7
1.5994 49.5401 6.5 9.5 28.3 7.3 600 63.3 20.5
1.6194 49.5401 6.5 9.5 28.4 7.3 600 63.3 20.2
1.6394 49.5401 6.5 9.5 28.4 7.3 600 63.3 20
1.6595 49.5401 6.5 9.5 28.4 7.3 600 63.2 19.8
1.6795 49.5401 6.5 9.5 28.4 7.4 600 63.2 19.9
1.6995 49.5401 6.5 9.4 28.5 7.4 600 63.2 20.1
1.7196 49.5401 6.5 9.4 28.7 7.6 600 63.2 20.4
1.7396 49.5401 6.5 9.4 28.8 7.7 600 63.1 21
1.7596 49.5401 6.5 9.4 28.9 7.8 600 63.1 21.9
1.7797 49.5401 6.5 9.3 28.9 7.8 600 63.1 22.3
1.7997 49.5401 6.5 9.3 29 7.9 600 63 22.6
1.8197 49.5401 6.5 9.3 29 8 560 63 22.9
1.8397 49.5401 6.5 9.3 29.1 8.1 525 62.9 23.5
1.8598 49.5401 6.5 9.3 29.2 8.1 525 62.9 24.3
1.8798 49.5401 6.5 9.2 29.2 8.2 525 62.9 24.7
1.8998 49.5401 6.5 9.2 29.3 8.3 525 62.8 25.1
1.9199 49.5401 6.5 9.2 29.3 8.3 525 62.8 25.5
1.9399 49.5401 6.6 9.2 29.4 8.4 525 62.8 25.9
1.9599 49.5401 6.6 9.2 29.4 8.4 525 62.7 26.6
1.98 49.5401 6.6 9.2 29.5 8.5 525 62.7 27.5
2 49.5401 6.6 9.2 29.5 8.5 525 62.7 28.4
-10.8 49.5601 6.3 10.1 30.2 7.5 550 58.9 18.8
-10.78 49.5601 6.3 10.1 30.2 7.6 550 58.9 19.1
-10.7599 49.5601 6.3 10.1 30.3 7.6 550 59 19.8
-10.7399 49.5601 6.3 10.1 30.4 7.7 550 59.1 20.9
-10.7199 49.5601 6.3 10.1 30.5 7.8 550 59.2 21.7
-10.6998 49.5601 6.3 10.1 30.6 7.9 550 59.2 21.7
-10.6798 49.5601 6.3 10.1 30.7 8 550 59.2 21.5
-10.6598 49.5601 6.3 10.1 30.8 8.1 550 59.2 21.8
-10.6397 49.5601 6.3 10.1 30.9 8.2 550 59.1 22.4
-10.6197 49.5601 6.3 10.1 31 8.3 550 59.1 23.1
-10.5997 49.5601 6.3 10.1 31.1 8.4 550 59 24
-10.5797 49.5601 6.3 10.1 31.3 8.5 550 59 24.9
-10.5596 49.5601 6.3 10.1 31.4 8.6 550 59 25.8
-10.5396 49.5601 6.3 10.1 31.4 8.6 550 58.9 26
-10.5196 49.5601 6.3 10.1 31.4 8.6 550 58.8 26
-10.4995 49.5601 6.3 10.1 31.5 8.7 550 58.9 26.4
-10.4795 49.5601 6.3 10.1 31.5 8.7 550 58.9 27.1
-10.4595 49.5601 6.3 10.1 31.6 8.8 550 58.9 27.7
-10.4394 49.5601 6.3 10.1 31.6 8.8 550 58.9 28.1
-10.4194 49.5601 6.3 10.1 31.7 8.9 550 58.9 28.6
-10.3994 49.5601 6.3 10.1 31.7 8.9 550 58.8 28.9
-10.3793 49.5601 6.3 10.1 31.8 9 550 58.8 29.5
-10.3593 49.5601 6.3 10.1 31.8 9 550 58.8 30.1
-10.3393 49.5601 6.3 10.1 31.8 9.1 574 58.8 30.7
-10.3192 49.5601 6.3 10.1 31.9 9.2 575 58.8 31.3
-10.2992 49.5601 6.3 10.2 31.9 9.2 575 58.8 31.9
-10.2792 49.5601 6.3 10.2 32 9.3 575 58.7 32.5
-10.2592 49.5601 6.3 10.2 32 9.3 575 58.7 33
-10.2391 49.5601 6.3 10.2 32.1 9.4 575 58.7 33.6
-10.2191 49.5601 6.3 10.2 32.2 9.4 575 58.7 34.2
-10.1991 49.5601 6.3 10.2 32.2 9.4 575 58.6 34.8
-10.179 49.5601 6.3 10.2 32.2 9.4 575 58.6 35.3
-10.159 49.5601 6.3 10.2 32.2 9.4 575 58.6 34.7
-10.139 49.5601 6.2 10.2 32.2 9.4 575 58.6 33.6
-10.1189 49.5601 6.2 10.2 32.2 9.3 575 58.6 32.6
-10.0989 49.5601 6.2 10.2 32.2 9.3 575 59 31.8
-10.0789 49.5601 6.2 10.2 32.2 9.3 586 59.4 30.9
-10.0588 49.5601 6.2 10.2 32.3 9.3 600 59.6 30.2
-10.0388 49.5601 6.2 10.3 32.3 9.3 600 59.6 30
-10.0188 49.5601 6.2 10.3 32.3 9.3 600 59.6 29.7
-9.9987 49.5601 6.2 10.3 32.3 9.2 600 59.5 29.7
-9.9787 49.5601 6.2 10.3 32.3 9.2 600 59.5 30.1
-9.9587 49.5601 6.2 10.3 32.3 9.2 600 59.4 30.6
-9.9387 49.5601 6.2 10.3 32.3 9.2 600 59.3 30.6
-9.9186 49.5601 6.2 10.3 32.3 9.2 600 59.3 30.7
-9.8986 49.5601 6.2 10.3 32.3 9.2 600 59.3 30.8
-9.8786 49.5601 6.2 10.3 32.3 9.2 600 59.7 30.6
-9.8585 49.5601 6.2 10.3 32.3 9.1 600 60.3 30.2
-9.8385 49.5601 6.2 10.3 32.3 9.1 600 60.8 29.9
-9.8185 49.5601 6.2 10.3 32.3 9 600 60.9 29.7
-9.7984 49.5601 6.2 10.3 32.3 9 600 60.9 29.4
-9.7784 49.5601 6.2 10.3 32.2 9 625 60.9 29.3
-9.7584 49.5601 6.2 10.3 32.2 8.9 625 60.8 29
-9.7383 49.5601 6.2 10.3 32.2 9 625 60.8 28.7
-9.7183 49.5601 6.2 10.3 32.2 9 625 60.8 28.6
-9.6983 49.5601 6.2 10.3 32.2 9 625 60.8 28.6
-9.6782 49.5601 6.2 10.3 32.2 9 625 60.4 28.5
-9.6582 49.5601 6.2 10.3 32.2 9 625 60.3 28.6
-9.6382 49.5601 6.2 10.3 32.1 9.1 625 60.3 28.8
-9.6182 49.5601 6.2 10.3 32.1 9.1 625 60.7 29
-9.5981 49.5601 6.2 10.3 32.1 9.1 625 60.8 29
-9.5781 49.5601 6.2 10.3 32.1 9.1 625 60.8 28.9
-9.5581 49.5601 6.2 10.3 32.1 9.1 625 60.9 29
-9.538 49.5601 6.2 10.3 32.1 9.1 625 60.9 29.5
-9.518 49.5601 6.2 10.3 32.1 9.2 625 60.9 29.9
-9.498 49.5601 6.2 10.3 32.1 9.2 625 60.9 30.7
-9.4779 49.5601 6.2 10.3 32 9.2 625 60.9 32
-9.4579 49.5601 6.2 10.3 32 9.2 625 60.5 32.9
-9.4379 49.5601 6.2 10.3 32 9.2 625 60.2 32.8
-9.4178 49.5601 6.2 10.3 32 9.2 625 60.2 32.5
-9.3978 49.5601 6.2 10.3 32 9.2 625 60.2 32.5
-9.3778 49.5601 6.2 10.3 32 9.2 625 60.2 33.3
-9.3577 49.5601 6.2 10.3 31.9 9.2 625 60.4 34.3
-9.3377 49.5601 6.2 10.3 31.9 9.2 625 60.9 35.3
-9.3177 49.5601 6.2 10.3 31.9 9.3 625 60.9 35.1
-9.2977 49.5601 6.2 10.3 31.8 9.3 625 60.9 34.7
-9.2776 49.5601 6.2 10.3 31.8 9.3 625 60.6 34.3
-9.2576 49.5601 6.2 10.3 31.8 9.3 625 60 33.8
-9.2376 49.5601 6.2 10.3 31.7 9.3 625 59.2 33.4
-9.2175 49.5601 6.2 10.3 31.7 9.3 625 58.9 33.2
-9.1975 49.5601 6.2 10.3 31.7 9.3 625 58.9 33.4
-9.1775 49.5601 6.2 10.3 31.7 9.3 625 58.8 33.4
-9.1574 49.5601 6.2 10.3 31.8 9.3 625 59.4 33.3
-9.1374 49.5601 6.2 10.3 31.8 9.3 625 60.1 33.2
-9.1174 49.5601 6.2 10.3 31.8 9.3 625 60.6 33.5
-9.0973 49.5601 6.2 10.3 31.8 9.3 625 60.7 33.7
-9.0773 49.5601 6.2 10.3 31.8 9.2 625 60.6 33.8
-9.0573 49.5601 6.2 10.3 31.7 9.2 625 60.6 33.4
-9.0372 49.5601 6.2 10.3 31.7 9.2 625 60.6 32.5
-9.0172 49.5601 6.2 10.3 31.6 9.2 625 60.5 31.7
-8.9972 49.5601 6.2 10.3 31.6 9.1 625 60.5 31.4
-8.9772 49.5601 6.2 10.3 31.6 9.1 625 60.5 31.4
-8.9571 49.5601 6.2 10.3 31.5 9.1 625 60.4 31.2
-8.9371 49.5601 6.2 10.3 31.4 9 625 60.4 30.9
-8.9171 49.5601 6.1 10.3 31.4 9 625 60.4 30.8
-8.897 49.5601 6.1 10.3 31.3 9 625 60.4 30.7
-8.877 49.5601 6.1 10.3 31.3 9 625 60.3 30.3
-8.857 49.5601 6.1 10.3 31.2 8.9 625 60.3 30.2
-8.8369 49.5601 6.1 10.3 31.1 8.9 625 60.3 30.4
-8.8169 49.5601 6.1 10.3 31.1 9 625 60.3 30.7
-8.7969 49.5601 6.1 10.3 31.1 9 625 60.2 30.8
-8.7768 49.5601 6.1 10.3 31.1 9.1 625 60.2 31.1
-8.7568 49.5601 6.1 10.3 31.1 9.1 625 60.1 31.7
-8.7368 49.5601 6.1 10.3 31.2 9.2 625 60.1 31.9
-8.7167 49.5601 6.1 10.2 31.2 9.3 625 60 32.8
-8.6967 49.5601 6.1 10.2 31.2 9.3 625 59.9 33.8
-8.6767 49.5601 6.1 10.2 31.2 9.4 600 59.8 34.7
-8.6567 49.5601 6.1 10.2 31.2 9.4 600 59.6 36.5
-8.6366 49.5601 6.1 10.2 31.2 9.4 600 59.4 38.5
-8.6166 49.5601 6.1 10.2 31.2 9.5 600 59.3 40.3
-8.5966 49.5601 6.1 10.2 31.1 9.5 600 59.1 42.1
-8.5765 49.5601 6.1 10.2 31.1 9.5 600 59.1 43.6
-8.5565 49.5601 6.1 10.2 31.1 9.5 600 58.9 45.8
-8.5365 49.5601 6.1 10.2 31 9.5 600 58.6 49.8
-8.5164 49.5601 6.1 10.2 31 9.4 600 58.7 53.1
-8.4964 49.5601 6.1 10.2 30.9 9.4 600 60.4 57.5
-8.4764 49.5601 6.1 10.2 30.9 9.4 600 62.4 62.8
-8.4563 49.5601 6.1 10.2 30.8 9.3 600 62.5 67.5
-8.4363 49.5601 6.1 10.2 30.7 9.3 600 62.5 67.8
-8.4163 49.5601 6.1 10.2 30.7 9.3 600 62.7 69.6
-8.3962 49.5601 6.1 10.2 30.6 9.2 600 62.5 73.5
-8.3762 49.5601 6.1 10.2 30.6 9.3 600 59.7 69.9
-8.3562 49.5601 6.1 10.2 30.6 9.4 600 59 67.2
-8.3362 49.5601 6.1 10.2 30.7 9.5 600 59.3 65.2
-8.3161 49.5601 6.1 10.2 30.7 9.6 600 59.6 63.2
-8.2961 49.5601 6.1 10.2 30.7 9.7 600 59.8 60.3
-8.2761 49.5601 6.1 10.2 30.7 9.7 600 59.9 58.1
-8.256 49.5601 6.1 10.2 30.7 9.7 600 60 56.9
-8.236 49.5601 6.1 10.2 30.7 9.7 600 60.1 55.8
-8.216 49.5601 6.1 10.2 30.6 9.6 600 59.7 54.7
-8.1959 49.5601 6.1 10.2 30.5 9.6 600 59.4 53.3
-8.1759 49.5601 6.1 10.2 30.4 9.5 600 59.4 52.2
-8.1559 49.5601 6.1 10.2 30.4 9.5 600 59.5 51.4
-8.1358 49.5601 6.1 10.2 30.3 9.4 600 59.5 50.8
-8.1158 49.5601 6.1 10.2 30.3 9.4 600 59.5 50.2
-8.0958 49.5601 6.1 10.2 30.2 9.4 600 59.5 49.5
-8.0757 49.5601 6.1 10.2 30.2 9.4 600 59.4 48.2
-8.0557 49.5601 6.1 10.2 30.2 9.3 600 59.3 46.9
-8.0357 49.5601 6.1 10.2 30.2 9.3 600 59.1 45.7
-8.0156 49.5601 6.1 10.2 30.2 9.3 600 58.3 44.4
-7.9956 49.5601 6.1 10.2 30.2 9.3 600 58 44
-7.9756 49.5601 6.1 10.2 30.1 9.3 600 58.2 44.4
-7.9556 49.5601 6.1 10.2 30.1 9.2 600 58 44.5
-7.9355 49.5601 6.1 10.2 30 9.2 600 60.4 45.7
-7.9155 49.5601 6.1 10.2 29.9 9.2 600 62.9 46.8
-7.8955 49.5601 6.1 10.2 29.9 9.2 600 63 47.1
-7.8754 49.5601 6.1 10.2 29.8 9.2 600 62.3 47.3
-7.8554 49.5601 6.1 10.2 29.8 9.2 614 63.3 48.2
-7.8354 49.5601 6.1 10.2 29.7 9.2 625 65 49.6
-7.8153 49.5601 6.1 10.2 29.7 9.2 625 65.1 50.6
-7.7953 49.5601 6.1 10.2 29.7 9.2 625 64.5 51.3
-7.7753 49.5601 6.1 10.2 29.6 9.2 625 64 51.8
-7.7552 49.5601 6.1 10.2 29.6 9.2 625 63.9 52.1
-7.7352 49.5601 6.1 10.2 29.6 9.2 625 63.6 52.4
-7.7152 49.5601 6.1 10.2 29.6 9.2 625 63.5 53.6
-7.6951 49.5601 6.1 10.2 29.6 9.2 625 63.4 55.3
-7.6751 49.5601 6.1 10.2 29.7 9.3 625 63.2 56.5
-7.6551 49.5601 6.1 10.2 29.7 9.3 625 63.2 56.7
-7.6351 49.5601 6.1 10.2 29.8 9.3 625 63.1 56.8
-7.615 49.5601 6.1 10.2 29.8 9.4 625 63.1 57.2
-7.595 49.5601 6.1 10.2 29.8 9.4 624 63 58.5
-7.575 49.5601 6.1 10.2 29.9 9.4 600 63 59.9
-7.5549 49.5601 6.1 10.2 29.9 9.5 600 62.9 61.9
-7.5349 49.5601 6.1 10.2 29.9 9.5 600 62.9 64.1
-7.5149 49.5601 6.1 10.2 29.9 9.6 600 62.9 66.4
-7.4948 49.5601 6.1 10.2 29.9 9.6 600 62.9 68.5
-7.4748 49.5601 6.1 10.2 30 9.6 600 62.9 70.5
-7.4548 49.5601 6.1 10.1 30 9.7 600 62.9 71.9
-7.4347 49.5601 6.1 10.1 30 9.7 600 62.9 72.9
-7.4147 49.5601 6.1 10.2 29.9 9.7 600 62.9 73.8
-7.3947 49.5601 6.1 10.2 29.9 9.6 600 62.9 74.1
-7.3746 49.5601 6.1 10.2 29.8 9.6 600 62.9 72.8
-7.3546 49.5601 6.1 10.2 29.8 9.5 600 62.9 70.9
-7.3346 49.5601 6.1 10.2 29.7 9.4 600 63 69.7
-7.3146 49.5601 6.1 10.2 29.6 9.4 600 63 69.6
-7.2945 49.5601 6.1 10.2 29.6 9.4 600 63.1 69.2
-7.2745 49.5601 6.1 10.2 29.5 9.4 600 63.1 68.4
-7.2545 49.5601 6.1 10.2 29.5 9.3 600 63.2 67.3
-7.2344 49.5601 6 10.2 29.5 9.3 600 63.3 66.4
-7.2144 49.5601 6 10.2 29.4 9.3 600 63.4 64.8
-7.1944 49.5601 6.1 10.2 29.4 9.2 600 63.4 62.7
-7.1743 49.5601 6 10.2 29.3 9.2 600 63.5 60.5
-7.1543 49.5601 6.1 10.2 29.2 9.1 600 63.6 57.6
-7.1343 49.5601 6 10.2 29 8.9 600 63.7 54.5
-7.1142 49.5601 6.1 10.3 28.9 8.8 600 63.7 51.5
-7.0942 49.5601 6 10.3 28.7 8.7 600 63.8 48.4
-7.0742 49.5601 6.1 10.3 28.6 8.5 600 63.9 45.4
-7.0541 49.5601 6.1 10.3 28.4 8.4 600 64.1 42.6
-7.0341 49.5601 6.1 10.3 28.3 8.2 605 64.2 39.9
-7.0141 49.5601 6.1 10.4 28.2 8.1 650 64.3 37
-6.9941 49.5601 6.1 10.4 28.1 8 650 64.4 34.9
-6.974 49.5601 6.1 10.4 28 7.9 650 64.4 33.3
-6.954 49.5601 6.1 10.4 27.9 7.8 650 64.5 31.8
-6.934 49.5601 6.1 10.4 27.8 7.6 650 64.6 30.7
-6.9139 49.5601 6.1 10.4 27.7 7.5 650 64.7 29.8
-6.8939 49.5601 6.1 10.4 27.6 7.4 650 64.8 29.1
-6.8739 49.5601 6.1 10.4 27.7 7.4 650 64.9 29.1
-6.8538 49.5601 6.1 10.4 27.8 7.5 650 64.9 29.2
-6.8338 49.5601 6.1 10.4 28 7.6 650 65 29.3
-6.8138 49.5601 6.1 10.4 28.1 7.7 650 65.1 29.6
-6.7937 49.5601 6.1 10.4 28.2 7.8 650 65.1 30
-6.7737 49.5601 6.1 10.4 28.4 7.9 650 65.1 30.6
-6.7537 49.5601 6.1 10.4 28.5 7.9 635 65.2 31.3
-6.7336 49.5601 6.1 10.4 28.6 8 625 65.3 32
-6.7136 49.5601 6.1 10.4 28.7 8 625 65.4 32.9
-6.6936 49.5601 6.1 10.3 28.8 8.1 625 65.6 33.7
-6.6736 49.5601 6.1 10.3 28.8 8.2 625 65.7 34.4
-6.6535 49.5601 6.1 10.3 28.9 8.2 625 65.8 35.2
-6.6335 49.5601 6.1 10.3 29 8.3 625 65.9 35.7
-6.6135 49.5601 6.1 10.3 29.1 8.3 625 66 36.1
-6.5934 49.5601 6.1 10.3 29.1 8.3 625 66.3 36.4
-6.5734 49.5601 6.1 10.3 29.1 8.2 625 66.4 36.6
-6.5534 49.5601 6.1 10.3 29.1 8.2 625 64.8 35.8
-6.5333 49.5601 6.1 10.3 29.1 8.2 625 63.3 34.2
-6.5133 49.5601 6.1 10.3 29.1 8.1 625 63.7 33
-6.4933 49.5601 6.1 10.3 29.1 8.1 625 64 32
-6.4732 49.5601 6.1 10.3 29.1 8 625 64.3 31.1
-6.4532 49.5601 6.1 10.3 29.1 8 625 64.6 30.4
-6.4332 49.5601 6.1 10.3 29.1 7.9 625 65 29.8
-6.4131 49.5601 6.1 10.3 29.1 7.9 625 65.4 29.2
-6.3931 49.5601 6.1 10.3 29.1 7.9 625 65.8 28.7
-6.3731 49.5601 6.1 10.3 29.1 7.8 625 65 28
-6.3531 49.5601 6.1 10.3 29.1 7.8 625 61.5 26.3
-6.333 49.5601 6.1 10.3 29.1 7.7 625 59.1 25.1
-6.313 49.5601 6.1 10.3 29 7.7 625 59.4 24.7
-6.293 49.5601 6.1 10.3 29 7.6 625 59.8 24.3
-6.2729 49.5601 6.1 10.3 29 7.5 625 60.1 23.9
-6.2529 49.5601 6.1 10.3 28.9 7.5 625 60.5 23.4
-6.2329 49.5601 6.1 10.4 28.9 7.4 625 60.9 22.8
-6.2128 49.5601 6.1 10.4 28.8 7.3 625 61.1 22.4
-6.1928 49.5601 6.1 10.4 28.7 7.3 641 61.3 21.8
-6.1728 49.5601 6.1 10.4 28.6 7.2 650 61.4 21.2
-6.1527 49.5601 6.1 10.4 28.6 7.1 650 61.6 20.8
-6.1327 49.5601 6.1 10.4 28.5 7 650 61.7 20.4
-6.1127 49.5601 6.1 10.4 28.4 6.9 650 61.7 19.9
-6.0926 49.5601 6.1 10.4 28.4 6.8 650 61.7 19.6
-6.0726 49.5601 6.1 10.4 28.3 6.8 650 61.8 19.4
-6.0526 49.5601 6.1 10.4 28.2 6.7 650 62 19.3
-6.0326 49.5601 6.1 10.4 28.2 6.7 650 62.1 19.4
-6.0125 49.5601 6.1 10.4 28.2 6.7 650 62.2 19.5
-5.9925 49.5601 6.1 10.4 28.1 6.7 650 62.1 19.5
-5.9725 49.5601 6.1 10.4 28.1 6.7 650 61.5 19.3
-5.9524 49.5601 6.1 10.4 28.1 6.7 650 60.9 19.2
-5.9324 49.5601 6.1 10.4 28.1 6.7 643 60.9 19.2
-5.9124 49.5601 6.1 10.4 28.1 6.7 600 60.9 19.2
-5.8923 49.5601 6.1 10.4 28.1 6.7 600 61 19.3
-5.8723 49.5601 6.1 10.4 28.1 6.8 600 61.1 19.3
-5.8523 49.5601 6.1 10.4 28.2 6.8 600 61.2 19.4
-5.8322 49.5601 6.1 10.4 28.2 6.8 600 61.3 19.4
-5.8122 49.5601 6.1 10.4 28.2 6.9 600 61.3 19.5
-5.7922 49.5601 6.1 10.3 28.2 6.9 600 61.4 19.5
-5.7721 49.5601 6.1 10.3 28.2 6.9 600 61.5 19.6
-5.7521 49.5601 6.1 10.3 28.1 6.8 600 61.5 19.6
-5.7321 49.5601 6.1 10.4 28 6.8 600 61.6 19.6
-5.7121 49.5601 6.1 10.4 27.9 6.7 600 61.6 19.6
-5.692 49.5601 6.1 10.4 27.9 6.7 600 61.7 19.6
-5.672 49.5601 6.1 10.4 27.8 6.7 600 61.8 19.6
-5.652 49.5601 6.1 10.4 27.8 6.7 583 62 19.6
-5.6319 49.5601 6.1 10.4 27.8 6.8 575 62.1 19.7
-5.6119 49.5601 6.1 10.4 27.7 6.8 575 62.2 19.8
-5.5919 49.5601 6.1 10.3 27.7 6.8 575 62.2 19.9
-5.5718 49.5601 6.1 10.3 27.6 6.8 575 62.3 20
-5.5518 49.5601 6.1 10.3 27.6 6.8 575 62.2 20.1
-5.5318 49.5601 6.1 10.3 27.6 6.8 575 61.9 20.1
-5.5117 49.5601 6.1 10.3 27.5 6.8 575 61.6 20.2
-5.4917 49.5601 6.1 10.3 27.5 6.8 575 61.5 20.3
-5.4717 49.5601 6.1 10.3 27.5 6.8 575 61.6 20.6
-5.4516 49.5601 6.1 10.3 27.5 6.7 575 61.6 20.7
-5.4316 49.5601 6.1 10.3 27.4 6.7 575 61.7 20.4
-5.4116 49.5601 6.1 10.3 27.4 6.7 575 61.7 20.2
-5.3915 49.5601 6.1 10.4 27.4 6.7 575 61.6 19.9
-5.3715 49.5601 6.1 10.3 27.3 6.7 570 61.4 19.7
-5.3515 49.5601 6.1 10.4 27.3 6.6 550 61.3 19.5
-5.3315 49.5601 6.1 10.4 27.3 6.6 550 61.3 19.3
-5.3114 49.5601 6.1 10.4 27.2 6.6 550 61.4 19.2
-5.2914 49.5601 6.1 10.4 27.2 6.6 550 61.4 19.1
-5.2714 49.5601 6.1 10.4 27.1 6.6 550 61.4 18.9
-5.2513 49.5601 6.1 10.4 27.1 6.6 550 61.5 18.8
-5.2313 49.5601 6.1 10.4 27.1 6.5 550 61.6 18.7
-5.2113 49.5601 6.1 10.4 27 6.5 550 61.7 18.7
-5.1912 49.5601 6.1 10.4 26.9 6.4 550 61.9 18.7
-5.1712 49.5601 6.1 10.3 26.8 6.4 550 62 18.6
-5.1512 49.5601 6.1 10.3 26.7 6.3 550 62.3 18.3
-5.1311 49.5601 6.1 10.3 26.7 6.3 550 62.7 18.2
-5.1111 49.5601 6.1 10.3 26.6 6.3 550 62.9 18.1
-5.0911 49.5601 6.1 10.3 26.6 6.2 532 63 18
-5.071 49.5601 6.1 10.3 26.5 6.2 525 63.1 17.9
-5.051 49.5601 6.1 10.3 26.4 6.2 525 63.2 17.9
-5.031 49.5601 6.1 10.3 26.4 6.1 525 63.3 17.8
-5.011 49.5601 6.1 10.3 26.3 6.1 525 63.4 17.7
-4.9909 49.5601 6.2 10.3 26.2 6 525 63.8 17.6
-4.9709 49.5601 6.2 10.3 26.2 6 525 64.3 17.6
-4.9509 49.5601 6.2 10.3 26.1 6 525 64.7 17.6
-4.9308 49.5601 6.2 10.3 26 6 525 64.9 17.7
-4.9108 49.5601 6.2 10.3 25.9 5.9 525 65 17.7
-4.8908 49.5601 6.2 10.3 25.9 5.9 525 65.1 17.6
-4.8707 49.5601 6.2 10.3 25.8 5.9 525 65.2 17.3
-4.8507 49.5601 6.2 10.3 25.7 5.8 525 65.2 17.1
-4.8307 49.5601 6.2 10.3 25.6 5.8 525 65.3 16.9
-4.8106 49.5601 6.2 10.3 25.5 5.7 525 65.3 16.8
-4.7906 49.5601 6.2 10.3 25.4 5.7 525 65.4 16.7
-4.7706 49.5601 6.2 10.3 25.3 5.7 525 65.5 16.7
-4.7505 49.5601 6.2 10.3 25.2 5.6 525 65.5 16.7
-4.7305 49.5601 6.2 10.3 25.1 5.6 525 65.7 16.6
-4.7105 49.5601 6.2 10.3 25.1 5.5 525 65.7 16.7
-4.6905 49.5601 6.2 10.3 25 5.5 525 65.8 16.8
-4.6704 49.5601 6.2 10.3 24.9 5.4 525 65.9 16.9
-4.6504 49.5601 6.2 10.3 24.7 5.5 525 66 17.3
-4.6304 49.5601 6.2 10.3 24.6 5.5 525 66.1 17.4
-4.6103 49.5601 6.2 10.3 24.5 5.5 525 66.1 17.4
-4.5903 49.5601 6.2 10.3 24.5 5.4 525 66.2 17.3
-4.5703 49.5601 6.2 10.3 24.4 5.4 525 66.4 17.4
-4.5502 49.5601 6.2 10.3 24.3 5.4 525 66.5 17.5
-4.5302 49.5601 6.2 10.3 24.2 5.4 506 66.6 17.7
-4.5102 49.5601 6.2 10.3 24.2 5.4 500 66.7 17.8
-4.4901 49.5601 6.2 10.3 24.1 5.4 500 66.6 17.9
-4.4701 49.5601 6.2 10.3 24 5.4 500 66.6 18.1
-4.4501 49.5601 6.2 10.3 23.9 5.4 500 66.7 18.2
-4.43 49.5601 6.2 10.3 23.8 5.4 500 66.5 18.3
-4.41 49.5601 6.2 10.3 23.8 5.3 500 66.2 18.5
-4.39 49.5601 6.2 10.3 23.7 5.4 500 66 18.7
-4.37 49.5601 6.2 10.3 23.7 5.4 500 66 18.9
-4.3499 49.5601 6.2 10.3 23.7 5.5 500 66 19.2
-4.3299 49.5601 6.2 10.2 23.6 5.5 500 66.1 19.4
-4.3099 49.5601 6.2 10.2 23.6 5.5 500 66.1 19.7
-4.2898 49.5601 6.2 10.2 23.5 5.5 500 66.2 20
-4.2698 49.5601 6.2 10.2 23.5 5.5 489 66.2 20.3
-4.2498 49.5601 6.2 10.2 23.5 5.5 450 66.3 20.6
-4.2297 49.5601 6.3 10.2 23.4 5.5 450 66.3 20.9
-4.2097 49.5601 6.3 10.2 23.4 5.5 450 66.4 21.2
-4.1897 49.5601 6.3 10.2 23.3 5.6 450 66.5 21.6
-4.1696 49.5601 6.3 10.2 23.3 5.6 450 66.6 21.9
-4.1496 49.5601 6.3 10.2 23.2 5.6 450 67 22.1
-4.1296 49.5601 6.3 10.2 23.2 5.6 450 67.5 22.4
-4.1095 49.5601 6.3 10.1 23.2 5.6 450 67.7 22.6
-4.0895 49.5601 6.3 10.1 23.2 5.6 450 67.8 22.7
-4.0695 49.5601 6.3 10.1 23.2 5.6 450 67.8 22.8
-4.0495 49.5601 6.3 10.1 23.2 5.6 450 67.8 22.8
-4.0294 49.5601 6.3 10 23.3 5.6 450 67.8 22.7
-4.0094 49.5601 6.3 10 23.3 5.6 450 67.8 22.6
-3.9894 49.5601 6.3 10 23.3 5.6 376 67.8 22.5
-3.9693 49.5601 6.3 9.9 23.3 5.6 350 67.7 22.4
-3.9493 49.5601 6.3 9.9 23.3 5.6 350 67.7 22.3
-3.9293 49.5601 6.3 9.9 23.4 5.5 350 67.7 22.2
-3.9092 49.5601 6.4 9.9 23.4 5.5 350 67.7 22.1
-3.8892 49.5601 6.4 9.8 23.4 5.5 350 67.6 22
-3.8692 49.5601 6.4 9.8 23.4 5.5 350 67.6 21.9
-3.8491 49.5601 6.4 9.8 23.4 5.5 350 67.6 21.9
-3.8291 49.5601 6.4 9.8 23.4 5.5 350 67.6 21.8
-3.8091 49.5601 6.4 9.7 23.4 5.5 350 67.6 21.9
-3.789 49.5601 6.4 9.7 23.4 5.5 350 67.5 21.9
-3.769 49.5601 6.4 9.7 23.4 5.5 350 67.5 21.9
-3.749 49.5601 6.4 9.7 23.4 5.5 350 67.5 21.9
-3.729 49.5601 6.4 9.6 23.3 5.5 350 67.5 21.9
-3.7089 49.5601 6.4 9.6 23.3 5.5 330 67.5 21.9
-3.6889 49.5601 6.5 9.6 23.3 5.5 275 67.4 21.9
-3.6689 49.5601 6.5 9.6 23.3 5.5 275 67.6 21.9
-3.6488 49.5601 6.5 9.5 23.3 5.5 275 68 22
-3.6288 49.5601 6.5 9.5 23.3 5.5 275 68.1 22
-3.6088 49.5601 6.5 9.5 23.3 5.5 275 68 21.9
-3.5887 49.5601 6.5 9.5 23.3 5.5 275 68.4 22
-3.5687 49.5601 6.5 9.5 23.2 5.5 275 69.1 22.1
-3.5487 49.5601 6.5 9.5 23.1 5.4 275 69.4 22.2
-3.5286 49.5601 6.5 9.5 23 5.4 275 69.4 22.5
-3.5086 49.5601 6.5 9.5 23 5.4 275 69.4 22.8
-3.4886 49.5601 6.5 9.5 22.9 5.4 275 69.3 22.8
-3.4685 49.5601 6.5 9.5 22.9 5.4 275 69.3 22.4
-3.4485 49.5601 6.5 9.5 22.8 5.4 275 69.2 22.1
-3.4285 49.5601 6.5 9.5 22.7 5.4 275 69.1 22.1
-3.4085 49.5601 6.5 9.5 22.7 5.4 275 69.1 22.2
-3.3884 49.5601 6.5 9.5 22.6 5.3 275 68.9 22.3
-3.3684 49.5601 6.5 9.5 22.5 5.3 275 68.8 22.4
-3.3484 49.5601 6.5 9.5 22.5 5.3 275 68.6 22.5
-3.3283 49.5601 6.5 9.5 22.4 5.3 275 68.2 22.5
-3.3083 49.5601 6.5 9.5 22.4 5.3 275 67.6 22.3
-3.2883 49.5601 6.5 9.5 22.3 5.2 275 67 22
-3.2682 49.5601 6.5 9.5 22.2 5.2 275 69.6 22.8
-3.2482 49.5601 6.5 9.5 22 5.1 275 73.5 24.1
-3.2282 49.5601 6.5 9.6 21.9 5.1 275 76.2 25
-3.2081 49.5601 6.5 9.6 21.8 5 275 75.4 24.4
-3.1881 49.5601 6.5 9.6 21.6 5 275 74.9 23.8
-3.1681 49.5601 6.5 9.7 21.5 5 295 75.5 23.7
-3.148 49.5601 6.5 9.7 21.3 4.9 350 76 23.8
-3.128 49.5601 6.5 9.7 21.2 4.9 350 75.8 23.8
-3.108 49.5601 6.5 9.7 21.1 4.8 350 75.4 23.8
-3.0879 49.5601 6.5 9.8 21 4.8 350 75.4 23.9
-3.0679 49.5601 6.5 9.8 20.8 4.8 350 75.3 24.2
-3.0479 49.5601 6.5 9.8 20.8 4.8 350 75.2 24.4
-3.0279 49.5601 6.5 9.8 20.8 4.8 350 75.2 24.7
-3.0078 49.5601 6.5 9.7 20.8 4.9 350 75.2 25
-2.9878 49.5601 6.5 9.7 20.8 4.9 350 75.3 25.9
-2.9678 49.5601 6.5 9.7 20.8 5 350 75.3 26.6
-2.9477 49.5601 6.5 9.7 20.9 5 350 75.3 27
-2.9277 49.5601 6.5 9.6 20.9 5.1 350 75.4 27.1
-2.9077 49.5601 6.5 9.6 20.9 5.1 350 75.4 27.4
-2.8876 49.5601 6.5 9.6 20.9 5.2 329 75.5 27.9
-2.8676 49.5601 6.5 9.6 20.9 5.2 309 75.6 28.7
-2.8476 49.5601 6.5 9.6 20.9 5.3 300 75.7 29.5
-2.8275 49.5601 6.5 9.5 20.9 5.3 300 75.9 30.2
-2.8075 49.5601 6.5 9.5 20.9 5.4 300 76.2 31.1
-2.7875 49.5601 6.5 9.5 20.9 5.4 300 76.4 31.8
-2.7674 49.5601 6.5 9.5 20.9 5.3 300 77.2 32.4
-2.7474 49.5601 6.5 9.5 20.8 5.3 300 77.8 33
-2.7274 49.5601 6.5 9.5 20.8 5.3 300 76.8 32.8
-2.7074 49.5601 6.5 9.5 20.8 5.3 300 73.6 31.4
-2.6873 49.5601 6.5 9.5 20.8 5.3 300 74.1 31.5
-2.6673 49.5601 6.5 9.5 20.8 5.3 300 76 32.1
-2.6473 49.5601 6.5 9.5 20.8 5.3 300 77.8 32
-2.6272 49.5601 6.5 9.5 20.8 5.3 300 79.5 31.9
-2.6072 49.5601 6.5 9.5 20.8 5.3 300 80 31.4
-2.5872 49.5601 6.5 9.5 20.9 5.3 300 71.1 27.9
-2.5671 49.5601 6.5 9.5 20.9 5.3 300 61.9 24.3
-2.5471 49.5601 6.5 9.5 20.9 5.3 300 57.7 22.6
-2.5271 49.5601 6.5 9.5 20.9 5.3 300 58.8 22.9
-2.507 49.5601 6.5 9.5 20.9 5.3 300 59.9 23.1
-2.487 49.5601 6.5 9.5 20.9 5.3 300 60.8 23.4
-2.467 49.5601 6.5 9.5 20.9 5.3 300 61.6 23.7
-2.4469 49.5601 6.5 9.5 20.9 5.3 300 62.3 23.9
-2.4269 49.5601 6.5 9.5 21 5.3 300 62.7 24.3
-2.4069 49.5601 6.5 9.4 21 5.4 300 63.1 24.6
-2.3869 49.5601 6.5 9.4 21 5.4 300 62.9 24.7
-2.3668 49.5601 6.5 9.4 21.1 5.4 300 61.9 24.3
-2.3468 49.5601 6.5 9.4 21.1 5.4 300 60.8 24
-2.3268 49.5601 6.5 9.4 21.2 5.5 279 67.1 26.5
-2.3067 49.5601 6.5 9.3 21.2 5.5 275 78.8 31.1
-2.2867 49.5601 6.5 9.3 21.2 5.5 275 84.2 33.4
-2.2667 49.5601 6.5 9.3 21.2 5.5 275 78 31.3
-2.2466 49.5601 6.5 9.3 21.2 5.5 275 68.2 27.9
-2.2266 49.5601 6.5 9.3 21.2 5.5 275 61 25.4
-2.2066 49.5601 6.5 9.3 21.2 5.5 275 60.8 25.4
-2.1865 49.5601 6.5 9.3 21.2 5.5 275 62.9 26.4
-2.1665 49.5601 6.5 9.3 21.1 5.5 275 64.5 27.1
-2.1465 49.5601 6.5 9.3 21.1 5.5 275 65.3 27.3
-2.1264 49.5601 6.5 9.3 21 5.5 275 65.4 27.4
-2.1064 49.5601 6.5 9.3 21 5.4 275 65.4 27.4
-2.0864 49.5601 6.5 9.3 20.9 5.4 275 66.1 27.5
-2.0664 49.5601 6.5 9.3 20.9 5.4 283 67.3 27.9
-2.0463 49.5601 6.5 9.3 20.9 5.3 300 67.8 28
-2.0263 49.5601 6.5 9.3 20.8 5.3 300 68.1 27.9
-2.0063 49.5601 6.5 9.3 20.8 5.3 300 68.5 27.9
-1.9862 49.5601 6.5 9.3 20.8 5.3 300 68.2 27.8
-1.9662 49.5601 6.5 9.2 20.8 5.4 300 67.8 27.6
-1.9462 49.5601 6.5 9.2 20.8 5.4 300 68.3 27.7
-1.9261 49.5601 6.5 9.2 20.8 5.4 300 71.1 28.5
-1.9061 49.5601 6.5 9.2 20.8 5.4 300 74.7 29.6
-1.8861 49.5601 6.5 9.2 20.8 5.5 300 76.7 30.4
-1.866 49.5601 6.5 9.2 20.8 5.5 300 76.1 30.9
-1.846 49.5601 6.5 9.2 20.8 5.5 300 75.3 31.4
-1.826 49.5601 6.5 9.2 20.8 5.5 300 74.9 31.8
-1.8059 49.5601 6.5 9.2 20.8 5.5 300 74.5 31.9
-1.7859 49.5601 6.5 9.2 20.8 5.6 300 74.2 32
-1.7659 49.5601 6.5 9.2 20.8 5.6 322 74 32.2
-1.7459 49.5601 6.5 9.2 20.8 5.6 325 73.9 32.3
-1.7258 49.5601 6.5 9.2 20.7 5.6 325 73.8 32.5
-1.7058 49.5601 6.5 9.2 20.7 5.6 325 73.8 32.5
-1.6858 49.5601 6.5 9.2 20.7 5.6 325 73.7 32.5
-1.6657 49.5601 6.5 9.2 20.7 5.6 325 73.7 32.4
-1.6457 49.5601 6.5 9.2 20.7 5.6 325 73.6 32.4
-1.6257 49.5601 6.5 9.2 20.7 5.6 325 73.6 32.3
-1.6056 49.5601 6.5 9.2 20.7 5.6 325 73.6 32.2
-1.5856 49.5601 6.5 9.2 20.8 5.6 325 73.6 32.3
-1.5656 49.5601 6.5 9.2 20.8 5.6 325 73.5 32.6
-1.5455 49.5601 6.5 9.2 20.8 5.6 325 73.5 32.6
-1.5255 49.5601 6.5 9.2 20.8 5.6 325 73.5 32.4
-1.5055 49.5601 6.5 9.2 20.9 5.6 325 73.4 31.8
-1.4854 49.5601 6.5 9.2 20.9 5.6 345 73.4 31.5
-1.4654 49.5601 6.5 9.2 20.9 5.6 375 73.3 31.3
-1.4454 49.5601 6.5 9.3 20.9 5.5 375 73.3 31.1
-1.4254 49.5601 6.5 9.3 20.9 5.5 375 73.2 31
-1.4053 49.5601 6.5 9.3 20.9 5.5 375 73.2 30.9
-1.3853 49.5601 6.4 9.3 20.9 5.5 375 73.2 30.8
-1.3653 49.5601 6.4 9.3 20.9 5.5 375 73.1 30.8
-1.3452 49.5601 6.4 9.3 20.9 5.5 375 73.1 30.7
-1.3252 49.5601 6.4 9.4 21 5.5 375 73.1 30.6
-1.3052 49.5601 6.4 9.4 21.1 5.5 375 73.1 30.8
-1.2851 49.5601 6.4 9.4 21.1 5.6 375 73.1 31
-1.2651 49.5601 6.4 9.4 21.2 5.6 375 73.2 30.8
-1.2451 49.5601 6.4 9.4 21.3 5.6 375 73.3 30.2
-1.225 49.5601 6.4 9.4 21.4 5.6 375 73.5 29.7
-1.205 49.5601 6.4 9.5 21.5 5.6 443 74 29.5
-1.185 49.5601 6.4 9.5 21.6 5.6 450 74.6 29.4
-1.1649 49.5601 6.4 9.5 21.8 5.7 450 73.8 28.8
-1.1449 49.5601 6.4 9.5 21.9 5.7 450 70.3 27.5
-1.1249 49.5601 6.4 9.5 22 5.7 450 66.3 26.1
-1.1049 49.5601 6.4 9.5 22.1 5.7 450 64.9 25.4
-1.0848 49.5601 6.4 9.6 22.2 5.7 450 65.4 25.2
-1.0648 49.5601 6.4 9.6 22.3 5.7 450 65.9 25.1
-1.0448 49.5601 6.4 9.6 22.5 5.8 450 65.9 24.9
-1.0247 49.5601 6.4 9.6 22.6 5.8 450 66 24.9
-1.0047 49.5601 6.4 9.6 22.7 5.8 450 65.9 24.8
-0.9847 49.5601 6.4 9.7 22.8 5.8 450 65.9 24.5
-0.9646 49.5601 6.4 9.6 23 5.8 450 65.9 24.1
-0.9446 49.5601 6.4 9.6 23.2 5.9 460 65.9 23.7
-0.9246 49.5601 6.4 9.6 23.3 5.9 475 65.9 23.4
-0.9045 49.5601 6.4 9.6 23.4 5.9 475 65.8 23.2
-0.8845 49.5601 6.4 9.6 23.6 6 475 65.6 22.9
-0.8645 49.5601 6.4 9.6 23.7 6 475 65.4 22.6
-0.8444 49.5601 6.4 9.6 23.9 6.1 475 65.2 22.4
-0.8244 49.5601 6.4 9.6 24 6.1 475 65 22.2
-0.8044 49.5601 6.4 9.6 24.1 6.1 475 64.6 22
-0.7844 49.5601 6.4 9.6 24.3 6.1 475 64.1 21.8
-0.7643 49.5601 6.4 9.6 24.4 6.2 475 63.7 21.7
-0.7443 49.5601 6.4 9.6 24.4 6.2 475 62.4 21.5
-0.7243 49.5601 6.4 9.6 24.5 6.2 475 61.2 21.2
-0.7042 49.5601 6.4 9.6 24.6 6.2 475 60.6 21
-0.6842 49.5601 6.4 9.7 24.7 6.3 475 60.2 20.7
-0.6642 49.5601 6.4 9.7 24.8 6.3 521 59.7 20.4
-0.6441 49.5601 6.4 9.7 24.9 6.3 525 58.9 20.2
-0.6241 49.5601 6.4 9.7 24.9 6.4 525 57.9 20
-0.6041 49.5601 6.4 9.7 25 6.4 525 60.1 20.7
-0.584 49.5601 6.4 9.7 25.1 6.4 525 73 24.4
-0.564 49.5601 6.4 9.7 25.2 6.4 525 83 27.4
-0.544 49.5601 6.4 9.7 25.3 6.5 525 81.4 26.9
-0.5239 49.5601 6.4 9.8 25.4 6.5 525 69.8 23.4
-0.5039 49.5601 6.4 9.8 25.4 6.5 525 62.4 21
-0.4839 49.5601 6.4 9.8 25.5 6.5 525 62.3 20.8
-0.4638 49.5601 6.4 9.8 25.6 6.5 525 63.5 21.1
-0.4438 49.5601 6.4 9.8 25.6 6.5 525 64.2 21.5
-0.4238 49.5601 6.4 9.8 25.6 6.5 525 64.5 21.4
-0.4038 49.5601 6.4 9.8 25.7 6.5 525 64.7 21.1
-0.3837 49.5601 6.4 9.8 25.8 6.6 536 64.8 20.6
-0.3637 49.5601 6.4 9.8 25.9 6.6 550 64.9 20.4
-0.3437 49.5601 6.4 9.8 25.9 6.6 550 65 20.3
-0.3236 49.5601 6.4 9.8 26 6.6 550 65 20.1
-0.3036 49.5601 6.4 9.8 26 6.6 550 65 20
-0.2836 49.5601 6.4 9.8 26.1 6.6 550 65 19.9
-0.2635 49.5601 6.4 9.8 26.2 6.6 550 65 19.8
-0.2435 49.5601 6.4 9.8 26.2 6.6 550 65 19.7
-0.2235 49.5601 6.4 9.8 26.2 6.6 550 65 19.6
-0.2034 49.5601 6.4 9.8 26.2 6.6 550 65 19.5
-0.1834 49.5601 6.4 9.8 26.3 6.6 550 65 19.5
-0.1634 49.5601 6.4 9.8 26.3 6.6 550 65 19.4
-0.1433 49.5601 6.4 9.8 26.3 6.6 550 65 19.3
-0.1233 49.5601 6.4 9.8 26.3 6.6 550 64.9 19.2
-0.1033 49.5601 6.4 9.8 26.3 6.6 574 64.9 19.1
-0.0833 49.5601 6.4 9.8 26.4 6.6 575 64.9 19.2
-0.0632 49.5601 6.4 9.8 26.4 6.6 575 64.9 19.3
-0.0432 49.5601 6.4 9.8 26.4 6.6 575 64.8 19.3
-0.0232 49.5601 6.4 9.8 26.4 6.6 575 64.8 19.2
-0.0031 49.5601 6.4 9.7 26.4 6.6 575 64.8 19.1
0.0169 49.5601 6.4 9.7 26.5 6.7 575 64.8 19.2
0.0369 49.5601 6.4 9.8 26.5 6.7 575 64.7 19.3
0.057 49.5601 6.4 9.8 26.6 6.7 575 64.7 19.4
0.077 49.5601 6.4 9.9 26.7 6.7 575 64.7 19.8
0.097 49.5601 6.5 10 26.7 6.8 575 64.6 20.1
0.1171 49.5601 6.5 10 26.7 6.8 575 64.6 20.2
0.1371 49.5601 6.5 10.1 26.7 6.8 575 64.5 19.9
0.1571 49.5601 6.5 10.2 26.8 6.8 575 64.5 19.6
0.1772 49.5601 6.5 10.2 26.9 6.9 575 64.5 19.6
0.1972 49.5601 6.5 10.3 26.9 6.9 575 64.4 19.7
0.2172 49.5601 6.5 10.3 26.9 6.9 575 64.4 19.8
0.2372 49.5601 6.6 10.4 27 6.9 575 64.4 19.9
0.2573 49.5601 6.6 10.4 27 7 575 64.3 20
0.2773 49.5601 6.6 10.4 27.1 7 575 64.3 20.1
0.2973 49.5601 6.6 10.4 27.1 7 575 64.3 20.2
0.3174 49.5601 6.5 10.3 27.1 7 575 64.2 20.2
0.3374 49.5601 6.5 10.3 27.2 7 575 64.2 20.2
0.3574 49.5601 6.5 10.2 27.2 7 575 64.2 20.3
0.3775 49.5601 6.5 10.1 27.2 7 575 64.1 20.3
0.3975 49.5601 6.5 10 27.3 7 575 64.1 20.2
0.4175 49.5601 6.5 10 27.3 7 575 64.1 20.1
0.4376 49.5601 6.5 9.9 27.3 7 599 64 19.9
0.4576 49.5601 6.4 9.8 27.4 7.1 600 64 19.9
0.4776 49.5601 6.4 9.7 27.4 7.1 600 64 19.8
0.4977 49.5601 6.4 9.7 27.4 7.1 600 64 19.8
0.5177 49.5601 6.4 9.7 27.5 7.1 600 64 19.8
0.5377 49.5601 6.4 9.7 27.5 7.1 600 63.9 19.9
0.5577 49.5601 6.4 9.7 27.5 7.1 600 63.9 20
0.5778 49.5601 6.4 9.7 27.6 7.2 600 63.9 20.1
0.5978 49.5601 6.4 9.7 27.6 7.2 600 63.9 20.2
0.6178 49.5601 6.4 9.7 27.7 7.2 600 63.8 20.4
0.6379 49.5601 6.4 9.6 27.7 7.2 600 63.8 20.5
0.6579 49.5601 6.4 9.6 27.8 7.3 600 63.8 20.6
0.6779 49.5601 6.4 9.6 27.8 7.3 600 63.8 20.8
0.698 49.5601 6.4 9.6 27.8 7.3 600 63.8 20.9
0.718 49.5601 6.4 9.6 27.8 7.3 600 63.7 21.1
0.738 49.5601 6.4 9.6 27.9 7.4 600 63.7 21.1
0.7581 49.5601 6.4 9.6 27.9 7.4 600 63.7 21.2
0.7781 49.5601 6.4 9.6 28 7.4 600 63.7 21.3
0.7981 49.5601 6.4 9.6 28 7.5 600 63.7 21.3
0.8182 49.5601 6.4 9.6 28 7.5 600 63.7 21.4
0.8382 49.5601 6.4 9.6 28.1 7.5 600 63.7 21.4
0.8582 49.5601 6.4 9.6 28.1 7.5 591 63.7 21.4
0.8782 49.5601 6.4 9.6 28.1 7.6 591 63.6 21.4
0.8983 49.5601 6.4 9.6 28.1 7.6 591 63.6 21.3
0.9183 49.5601 6.4 9.6 28.1 7.6 579 63.6 21.3
0.9383 49.5601 6.4 9.6 28.1 7.7 575 63.6 21.3
0.9584 49.5601 6.4 9.6 28.1 7.7 575 63.6 21.1
0.9784 49.5601 6.4 9.6 28.2 7.7 575 63.6 20.8
0.9984 49.5601 6.4 9.6 28.1 7.7 591 63.6 20.5
1.0185 49.5601 6.4 9.6 28.1 7.7 600 63.6 20.4
1.0385 49.5601 6.4 9.6 28.1 7.6 600 63.6 20.4
1.0585 49.5601 6.4 9.6 28 7.6 600 63.6 20.4
1.0786 49.5601 6.4 9.6 28 7.5 600 63.5 20.5
1.0986 49.5601 6.4 9.6 27.9 7.4 600 63.5 20.5
1.1186 49.5601 6.4 9.6 27.9 7.4 600 63.5 20.5
1.1387 49.5601 6.5 9.6 27.9 7.4 600 63.5 20.7
1.1587 49.5601 6.5 9.6 27.9 7.4 600 63.5 20.9
1.1787 49.5601 6.5 9.6 28 7.4 600 63.5 21.1
1.1987 49.5601 6.5 9.6 28 7.5 600 63.5 21.5
1.2188 49.5601 6.5 9.6 28 7.5 600 63.4 22
1.2388 49.5601 6.5 9.6 28.1 7.5 600 63.4 22.1
1.2588 49.5601 6.5 9.6 28.1 7.5 600 63.4 21.9
1.2789 49.5601 6.5 9.6 28.1 7.5 600 63.4 21.6
1.2989 49.5601 6.5 9.6 28.1 7.5 600 63.4 21.6
1.3189 49.5601 6.5 9.5 28.2 7.5 600 63.4 21.7
1.339 49.5601 6.5 9.5 28.2 7.5 600 63.4 21.8
1.359 49.5601 6.5 9.5 28.2 7.5 600 63.4 21.7
1.379 49.5601 6.5 9.5 28.2 7.5 600 63.4 21.6
1.3991 49.5601 6.5 9.5 28.2 7.5 600 63.4 21.5
1.4191 49.5601 6.5 9.5 28.2 7.5 600 63.3 21.5
1.4391 49.5601 6.5 9.5 28.2 7.4 600 63.3 21.5
1.4592 49.5601 6.5 9.5 28.2 7.3 600 63.3 21.6
1.4792 49.5601 6.5 9.5 28.2 7.3 600 63.3 22
1.4992 49.5601 6.5 9.5 28.2 7.3 600 63.3 22.1
1.5192 49.5601 6.5 9.5 28.2 7.3 600 63.3 21.7
1.5393 49.5601 6.5 9.5 28.3 7.3 600 63.3 21.1
1.5593 49.5601 6.5 9.5 28.3 7.3 600 63.3 20.7
1.5793 49.5601 6.5 9.5 28.3 7.3 600 63.3 20.5
1.5994 49.5601 6.5 9.5 28.3 7.3 600 63.3 20.2
1.6194 49.5601 6.5 9.5 28.4 7.4 600 63.3 20.1
1.6394 49.5601 6.5 9.5 28.4 7.4 600 63.3 20
1.6595 49.5601 6.5 9.5 28.4 7.4 600 63.2 19.9
1.6795 49.5601 6.5 9.5 28.4 7.4 600 63.2 20
1.6995 49.5601 6.5 9.4 28.5 7.4 600 63.2 20.2
1.7196 49.5601 6.5 9.4 28.6 7.5 600 63.2 20.4
1.7396 49.5601 6.5 9.4 28.7 7.7 600 63.1 21
1.7596 49.5601 6.5 9.4 28.8 7.7 600 63.1 21.4
1.7797 49.5601 6.5 9.3 28.8 7.8 600 63.1 21.9
1.7997 49.5601 6.5 9.3 28.9 7.8 600 63 22.2
1.8197 49.5601 6.5 9.3 28.9 7.9 560 63 22.6
1.8397 49.5601 6.5 9.3 29 8 525 63 23.1
1.8598 49.5601 6.5 9.3 29.1 8.1 525 62.9 23.7
1.8798 49.5601 6.5 9.3 29.1 8.1 525 62.9 24.3
1.8998 49.5601 6.5 9.2 29.1 8.2 525 62.9 24.9
1.9199 49.5601 6.5 9.2 29.2 8.2 525 62.8 25.4
1.9399 49.5601 6.5 9.2 29.3 8.3 525 62.8 26.1
1.9599 49.5601 6.6 9.2 29.3 8.4 525 62.8 27
1.98 49.5601 6.6 9.2 29.4 8.5 525 62.7 28.1
2 49.5601 6.6 9.2 29.5 8.6 525 62.7 29.4
-10.8 49.5802 6.3 10.1 30.2 7.6 550 59 19.1
-10.78 49.5802 6.3 10.1 30.3 7.6 550 59.1 19.3
-10.7599 49.5802 6.3 10.1 30.3 7.6 550 59.1 19.7
-10.7399 49.5802 6.3 10.1 30.4 7.7 550 59.1 20.2
-10.7199 49.5802 6.3 10.1 30.5 7.8 550 59.2 20.9
-10.6998 49.5802 6.3 10.1 30.6 7.9 550 59.2 21.4
-10.6798 49.5802 6.3 10.1 30.8 8 550 59.2 21.7
-10.6598 49.5802 6.3 10.1 30.9 8.1 550 59.1 22.1
-10.6397 49.5802 6.3 10.1 31 8.2 550 59.1 22.7
-10.6197 49.5802 6.3 10.1 31.1 8.3 550 59 23.3
-10.5997 49.5802 6.3 10.1 31.2 8.4 550 58.9 24.1
-10.5797 49.5802 6.3 10.1 31.4 8.6 550 58.9 24.9
-10.5596 49.5802 6.3 10.1 31.5 8.7 550 58.8 25.7
-10.5396 49.5802 6.3 10.1 31.6 8.8 550 58.6 26.4
-10.5196 49.5802 6.3 10.1 31.6 8.8 550 58.4 26.8
-10.4995 49.5802 6.3 10.1 31.7 8.8 550 58.5 27.3
-10.4795 49.5802 6.3 10.1 31.7 8.8 550 58.7 28.3
-10.4595 49.5802 6.3 10.1 31.7 8.9 550 58.8 29
-10.4394 49.5802 6.3 10.1 31.8 9 550 58.8 29.4
-10.4194 49.5802 6.3 10.1 31.9 9 550 58.8 29.5
-10.3994 49.5802 6.3 10.1 31.9 9.1 550 58.8 29.9
-10.3793 49.5802 6.3 10.1 31.9 9.1 550 58.7 30.5
-10.3593 49.5802 6.3 10.1 32 9.2 550 58.7 31.1
-10.3393 49.5802 6.3 10.1 32.1 9.3 574 58.7 31.9
-10.3192 49.5802 6.3 10.1 32.1 9.3 575 58.7 32.9
-10.2992 49.5802 6.3 10.2 32.2 9.4 575 58.7 33.7
-10.2792 49.5802 6.3 10.2 32.2 9.5 575 58.7 34.4
-10.2592 49.5802 6.3 10.2 32.3 9.5 575 58.6 35.2
-10.2391 49.5802 6.3 10.2 32.3 9.6 575 58.6 35.8
-10.2191 49.5802 6.3 10.2 32.4 9.6 575 58.6 36.4
-10.1991 49.5802 6.3 10.2 32.4 9.6 575 58.5 37
-10.179 49.5802 6.3 10.2 32.4 9.6 575 58.5 37.5
-10.159 49.5802 6.3 10.2 32.4 9.6 575 58.5 36.7
-10.139 49.5802 6.3 10.2 32.4 9.6 575 58.5 35.4
-10.1189 49.5802 6.2 10.2 32.4 9.5 575 58.5 34.3
-10.0989 49.5802 6.2 10.2 32.5 9.5 575 58.9 33.6
-10.0789 49.5802 6.2 10.2 32.5 9.5 586 59.3 32.9
-10.0588 49.5802 6.2 10.2 32.5 9.5 600 59.5 32.1
-10.0388 49.5802 6.2 10.2 32.5 9.5 600 59.5 31.6
-10.0188 49.5802 6.2 10.3 32.5 9.5 600 59.5 31.2
-9.9987 49.5802 6.2 10.3 32.5 9.5 600 59.4 31.1
-9.9787 49.5802 6.2 10.3 32.5 9.4 600 59.4 31.4
-9.9587 49.5802 6.2 10.3 32.6 9.4 600 59.3 31.8
-9.9387 49.5802 6.2 10.3 32.6 9.4 600 59.6 31.7
-9.9186 49.5802 6.2 10.3 32.6 9.4 600 59.9 31.5
-9.8986 49.5802 6.2 10.3 32.5 9.4 600 59.8 31.5
-9.8786 49.5802 6.2 10.3 32.5 9.3 600 59.9 31.4
-9.8585 49.5802 6.2 10.3 32.5 9.3 600 60.4 31
-9.8385 49.5802 6.2 10.3 32.5 9.3 600 60.7 30.6
-9.8185 49.5802 6.2 10.3 32.5 9.2 600 60.8 30.4
-9.7984 49.5802 6.2 10.3 32.5 9.2 600 60.7 30
-9.7784 49.5802 6.2 10.3 32.5 9.2 625 60.7 29.6
-9.7584 49.5802 6.2 10.3 32.4 9.1 625 60.7 29.1
-9.7383 49.5802 6.2 10.3 32.4 9.1 625 60.7 28.8
-9.7183 49.5802 6.2 10.3 32.4 9.1 625 60.7 28.5
-9.6983 49.5802 6.2 10.3 32.4 9.1 625 60.6 28.5
-9.6782 49.5802 6.2 10.3 32.4 9.1 625 60.6 28.5
-9.6582 49.5802 6.2 10.3 32.4 9.1 625 60.6 28.7
-9.6382 49.5802 6.2 10.3 32.4 9.2 625 60.6 28.9
-9.6182 49.5802 6.2 10.3 32.4 9.2 625 60.7 29.1
-9.5981 49.5802 6.2 10.3 32.3 9.2 625 60.7 29.1
-9.5781 49.5802 6.2 10.3 32.3 9.2 625 60.7 29
-9.5581 49.5802 6.2 10.3 32.3 9.2 625 60.7 29.1
-9.538 49.5802 6.2 10.3 32.3 9.2 625 60.7 29.5
-9.518 49.5802 6.2 10.3 32.3 9.3 625 60.7 30
-9.498 49.5802 6.2 10.3 32.3 9.3 625 60.7 30.6
-9.4779 49.5802 6.2 10.3 32.3 9.3 625 60.7 31.9
-9.4579 49.5802 6.2 10.3 32.3 9.3 625 60.7 33.2
-9.4379 49.5802 6.2 10.3 32.2 9.3 625 60.7 33.6
-9.4178 49.5802 6.2 10.3 32.2 9.3 625 60.7 33.3
-9.3978 49.5802 6.2 10.3 32.2 9.4 625 60.7 33.1
-9.3778 49.5802 6.2 10.3 32.2 9.4 625 60.7 33.8
-9.3577 49.5802 6.2 10.3 32.1 9.4 625 60.7 34.7
-9.3377 49.5802 6.2 10.3 32.1 9.4 625 60.7 35.6
-9.3177 49.5802 6.2 10.3 32.1 9.4 625 60.7 35.6
-9.2977 49.5802 6.2 10.3 32.1 9.4 625 60.7 35.3
-9.2776 49.5802 6.2 10.3 32 9.4 625 60.5 35.1
-9.2576 49.5802 6.2 10.3 32 9.4 625 60.1 34.7
-9.2376 49.5802 6.2 10.3 32 9.4 625 59.3 34.3
-9.2175 49.5802 6.2 10.3 31.9 9.4 625 59 34.3
-9.1975 49.5802 6.2 10.3 31.9 9.4 625 59 34.5
-9.1775 49.5802 6.2 10.3 31.9 9.4 625 59 34.8
-9.1574 49.5802 6.2 10.3 31.9 9.4 625 59.3 34.7
-9.1374 49.5802 6.2 10.3 31.9 9.4 625 60 34.5
-9.1174 49.5802 6.2 10.3 31.9 9.4 625 60.5 34.4
-9.0973 49.5802 6.2 10.3 31.9 9.4 625 60.5 34.6
-9.0773 49.5802 6.2 10.3 31.9 9.4 625 60.5 34.8
-9.0573 49.5802 6.2 10.3 31.8 9.3 625 60.5 34.6
-9.0372 49.5802 6.2 10.3 31.8 9.3 625 60.5 33.7
-9.0172 49.5802 6.2 10.3 31.8 9.3 625 60.4 32.8
-8.9972 49.5802 6.2 10.3 31.7 9.3 625 60.4 32.2
-8.9772 49.5802 6.2 10.3 31.7 9.2 625 60.4 32.4
-8.9571 49.5802 6.2 10.3 31.6 9.2 625 60.3 32.5
-8.9371 49.5802 6.2 10.3 31.6 9.2 625 60.3 32.4
-8.9171 49.5802 6.2 10.3 31.6 9.1 625 60.3 32.2
-8.897 49.5802 6.2 10.3 31.5 9.1 625 60.2 31.9
-8.877 49.5802 6.1 10.3 31.4 9.1 625 60.2 31.4
-8.857 49.5802 6.1 10.3 31.4 9.1 625 60.1 31
-8.8369 49.5802 6.1 10.3 31.3 9 625 60.1 30.7
-8.8169 49.5802 6.1 10.3 31.3 9.1 625 60 31.1
-8.7969 49.5802 6.1 10.3 31.3 9.1 625 60 31.5
-8.7768 49.5802 6.1 10.3 31.3 9.2 625 59.9 32.1
-8.7568 49.5802 6.1 10.3 31.3 9.3 625 59.9 32.8
-8.7368 49.5802 6.1 10.3 31.3 9.3 625 59.8 33.5
-8.7167 49.5802 6.1 10.3 31.4 9.4 625 59.6 34.5
-8.6967 49.5802 6.1 10.2 31.4 9.5 625 59.4 35.8
-8.6767 49.5802 6.1 10.2 31.4 9.5 600 59.2 37.1
-8.6567 49.5802 6.1 10.2 31.4 9.6 600 59.4 39.3
-8.6366 49.5802 6.1 10.2 31.5 9.7 600 59.1 41.7
-8.6166 49.5802 6.1 10.2 31.4 9.7 600 58.8 43.9
-8.5966 49.5802 6.1 10.2 31.4 9.7 600 58.6 46.1
-8.5765 49.5802 6.1 10.2 31.4 9.7 600 58.4 48.1
-8.5565 49.5802 6.1 10.2 31.3 9.7 600 58.3 50.5
-8.5365 49.5802 6.1 10.2 31.3 9.7 600 58 54.6
-8.5164 49.5802 6.1 10.2 31.2 9.7 600 57.8 58.5
-8.4964 49.5802 6.1 10.2 31.2 9.6 600 59.4 63.3
-8.4764 49.5802 6.1 10.2 31.1 9.6 600 62.7 68.5
-8.4563 49.5802 6.1 10.2 31 9.6 600 65.8 74
-8.4363 49.5802 6.1 10.2 31 9.5 600 66.8 74.4
-8.4163 49.5802 6.1 10.2 30.9 9.5 600 67 72.9
-8.3962 49.5802 6.1 10.2 30.8 9.4 600 67 71.8
-8.3762 49.5802 6.1 10.2 30.8 9.4 600 64 68.1
-8.3562 49.5802 6.1 10.2 30.7 9.4 600 60.7 63.7
-8.3362 49.5802 6.1 10.2 30.7 9.5 600 58.7 60.3
-8.3161 49.5802 6.1 10.2 30.8 9.6 600 59.1 58.6
-8.2961 49.5802 6.1 10.2 30.8 9.6 600 59.5 57
-8.2761 49.5802 6.1 10.2 30.8 9.7 600 59.7 55.5
-8.256 49.5802 6.1 10.2 30.8 9.7 600 59.9 54.3
-8.236 49.5802 6.1 10.2 30.7 9.6 600 60 53.2
-8.216 49.5802 6.1 10.2 30.7 9.6 600 59.7 52
-8.1959 49.5802 6.1 10.2 30.6 9.6 600 59.1 50.8
-8.1759 49.5802 6.1 10.2 30.5 9.5 600 58.6 49.6
-8.1559 49.5802 6.1 10.2 30.5 9.5 600 58.5 48.9
-8.1358 49.5802 6.1 10.2 30.4 9.4 600 58.5 48.3
-8.1158 49.5802 6.1 10.2 30.3 9.4 600 58.5 47.7
-8.0958 49.5802 6.1 10.2 30.3 9.3 600 58.5 47.1
-8.0757 49.5802 6.1 10.2 30.2 9.3 600 58.4 46.4
-8.0557 49.5802 6.1 10.2 30.2 9.3 600 58.4 45.5
-8.0357 49.5802 6.1 10.2 30.2 9.3 600 58.3 44.3
-8.0156 49.5802 6.1 10.1 30.2 9.2 600 58.2 43.2
-7.9956 49.5802 6.1 10.2 30.2 9.2 600 58 42.7
-7.9756 49.5802 6.1 10.2 30.1 9.2 600 57.8 43
-7.9556 49.5802 6.1 10.2 30 9.2 600 57.6 43.1
-7.9355 49.5802 6.1 10.1 30 9.2 600 58.2 43.6
-7.9155 49.5802 6.1 10.1 29.9 9.1 600 58.2 43.8
-7.8955 49.5802 6.1 10.1 29.9 9.1 600 58.5 44.2
-7.8754 49.5802 6.1 10.2 29.8 9.1 600 60.6 45.5
-7.8554 49.5802 6.1 10.2 29.8 9.1 614 63.8 47.5
-7.8354 49.5802 6.1 10.2 29.8 9.2 625 65.8 48.9
-7.8153 49.5802 6.1 10.2 29.8 9.2 625 65.2 49.6
-7.7953 49.5802 6.1 10.2 29.7 9.2 625 64.5 50.2
-7.7753 49.5802 6.1 10.2 29.7 9.2 625 64.4 50.8
-7.7552 49.5802 6.1 10.2 29.7 9.2 625 64.1 50.9
-7.7352 49.5802 6.1 10.2 29.6 9.2 625 63.9 51.2
-7.7152 49.5802 6.1 10.2 29.6 9.2 625 63.7 52.1
-7.6951 49.5802 6.1 10.2 29.7 9.2 625 63.5 53.4
-7.6751 49.5802 6.1 10.2 29.7 9.2 625 63.4 54.5
-7.6551 49.5802 6.1 10.2 29.8 9.3 625 63.3 55.1
-7.6351 49.5802 6.1 10.2 29.8 9.3 625 63.2 55.6
-7.615 49.5802 6.1 10.2 29.8 9.4 625 63.1 56.2
-7.595 49.5802 6.1 10.2 29.8 9.4 624 63.1 58
-7.575 49.5802 6.1 10.2 29.9 9.4 600 63 59.8
-7.5549 49.5802 6.1 10.2 29.9 9.5 600 63 61.8
-7.5349 49.5802 6.1 10.2 29.9 9.5 600 62.9 64.1
-7.5149 49.5802 6.1 10.2 29.9 9.5 600 62.9 66.4
-7.4948 49.5802 6.1 10.2 29.9 9.6 600 62.9 68.3
-7.4748 49.5802 6.1 10.1 30 9.6 600 62.9 69.7
-7.4548 49.5802 6.1 10.1 30 9.7 600 62.9 71
-7.4347 49.5802 6.1 10.1 30 9.7 600 62.9 72.1
-7.4147 49.5802 6.1 10.1 29.9 9.6 600 62.9 73.1
-7.3947 49.5802 6.1 10.1 29.9 9.6 600 62.9 73.5
-7.3746 49.5802 6.1 10.1 29.8 9.6 600 62.9 72.2
-7.3546 49.5802 6.1 10.2 29.8 9.5 600 62.9 70.4
-7.3346 49.5802 6.1 10.2 29.7 9.5 600 63 69.1
-7.3146 49.5802 6.1 10.2 29.6 9.4 600 63 68.6
-7.2945 49.5802 6.1 10.2 29.6 9.4 600 63 68.2
-7.2745 49.5802 6.1 10.2 29.6 9.4 600 63.1 67.6
-7.2545 49.5802 6.1 10.2 29.5 9.3 600 63.1 67
-7.2344 49.5802 6.1 10.2 29.5 9.3 600 63.2 66.2
-7.2144 49.5802 6 10.2 29.4 9.3 600 63.3 64.6
-7.1944 49.5802 6 10.2 29.4 9.2 600 63.4 62.5
-7.1743 49.5802 6 10.2 29.4 9.2 600 63.4 60.4
-7.1543 49.5802 6 10.2 29.2 9.1 600 63.5 57.6
-7.1343 49.5802 6.1 10.2 29.1 8.9 600 63.6 54.7
-7.1142 49.5802 6 10.3 28.9 8.8 600 63.7 51.7
-7.0942 49.5802 6 10.3 28.7 8.7 600 63.7 48.7
-7.0742 49.5802 6.1 10.3 28.6 8.5 600 63.9 45.8
-7.0541 49.5802 6.1 10.3 28.5 8.4 600 63.9 42.8
-7.0341 49.5802 6.1 10.3 28.4 8.3 605 64 39.9
-7.0141 49.5802 6.1 10.3 28.3 8.2 650 64.1 37.1
-6.9941 49.5802 6.1 10.4 28.2 8.1 650 64.2 34.9
-6.974 49.5802 6.1 10.4 28.1 7.9 650 64.2 33.4
-6.954 49.5802 6.1 10.4 28 7.8 650 64.3 31.9
-6.934 49.5802 6.1 10.4 27.9 7.7 650 64.4 30.7
-6.9139 49.5802 6.1 10.4 27.8 7.6 650 64.4 29.8
-6.8939 49.5802 6.1 10.4 27.8 7.5 650 64.5 29.1
-6.8739 49.5802 6.1 10.4 27.8 7.5 650 64.6 29
-6.8538 49.5802 6.1 10.4 27.9 7.5 650 64.6 29
-6.8338 49.5802 6.1 10.4 28 7.6 650 64.6 29.1
-6.8138 49.5802 6.1 10.4 28.2 7.8 650 64.7 29.6
-6.7937 49.5802 6.1 10.4 28.3 7.8 650 64.7 30
-6.7737 49.5802 6.1 10.4 28.4 7.9 650 64.7 30.6
-6.7537 49.5802 6.1 10.4 28.5 7.9 635 64.7 31.2
-6.7336 49.5802 6.1 10.4 28.6 8 625 64.8 31.9
-6.7136 49.5802 6.1 10.3 28.7 8 625 64.8 32.7
-6.6936 49.5802 6.1 10.3 28.8 8.1 625 64.9 33.5
-6.6736 49.5802 6.1 10.3 28.9 8.2 625 64.9 34.3
-6.6535 49.5802 6.1 10.3 29 8.2 625 65 34.7
-6.6335 49.5802 6.1 10.3 29.1 8.3 625 65 35.2
-6.6135 49.5802 6.1 10.3 29.2 8.3 625 65.1 35.6
-6.5934 49.5802 6.1 10.3 29.2 8.3 625 65.2 35.9
-6.5734 49.5802 6.1 10.3 29.2 8.2 625 65.3 36.2
-6.5534 49.5802 6.1 10.3 29.2 8.2 625 65.5 35.7
-6.5333 49.5802 6.1 10.3 29.2 8.2 625 65.8 34.5
-6.5133 49.5802 6.1 10.3 29.2 8.1 625 66.1 33.4
-6.4933 49.5802 6.1 10.3 29.2 8.1 625 66.3 32.5
-6.4732 49.5802 6.1 10.3 29.2 8 625 66.5 31.7
-6.4532 49.5802 6.1 10.3 29.2 8 625 66.6 30.9
-6.4332 49.5802 6.1 10.3 29.2 7.9 625 66.9 30.2
-6.4131 49.5802 6.1 10.3 29.1 7.9 625 67.3 29.7
-6.3931 49.5802 6.1 10.3 29.1 7.8 625 67 28.9
-6.3731 49.5802 6.1 10.3 29.1 7.8 625 63.9 27.4
-6.3531 49.5802 6.1 10.3 29.1 7.7 625 61.1 26
-6.333 49.5802 6.1 10.3 29.1 7.7 625 61 25.4
-6.313 49.5802 6.1 10.3 29.1 7.6 625 61.5 25.1
-6.293 49.5802 6.1 10.3 29.1 7.6 625 62 24.7
-6.2729 49.5802 6.1 10.3 29 7.5 625 62.5 24.2
-6.2529 49.5802 6.1 10.3 28.9 7.4 625 63 23.7
-6.2329 49.5802 6.1 10.4 28.8 7.3 625 60.9 22.5
-6.2128 49.5802 6.1 10.4 28.8 7.3 625 60.1 21.6
-6.1928 49.5802 6.1 10.4 28.7 7.2 641 60.3 21.1
-6.1728 49.5802 6.1 10.4 28.6 7.1 650 60.6 20.6
-6.1527 49.5802 6.1 10.4 28.5 7 650 60.8 20.1
-6.1327 49.5802 6.1 10.4 28.5 6.9 650 61 19.7
-6.1127 49.5802 6.1 10.4 28.4 6.9 650 61.2 19.3
-6.0926 49.5802 6.1 10.4 28.3 6.8 650 61.3 19.1
-6.0726 49.5802 6.1 10.4 28.2 6.7 650 61.5 18.9
-6.0526 49.5802 6.1 10.4 28.2 6.6 650 61.8 18.8
-6.0326 49.5802 6.1 10.4 28.2 6.6 650 61.9 19
-6.0125 49.5802 6.1 10.4 28.1 6.6 650 62 19
-5.9925 49.5802 6.1 10.4 28.1 6.6 650 61.8 18.9
-5.9725 49.5802 6.1 10.4 28.1 6.6 650 61.3 18.8
-5.9524 49.5802 6.1 10.4 28.1 6.6 650 61.4 18.9
-5.9324 49.5802 6.1 10.4 28.2 6.7 643 61.5 18.9
-5.9124 49.5802 6.1 10.4 28.2 6.7 600 61.6 19
-5.8923 49.5802 6.1 10.4 28.2 6.7 600 61.7 19.1
-5.8723 49.5802 6.1 10.4 28.2 6.8 600 61.8 19.1
-5.8523 49.5802 6.1 10.4 28.2 6.8 600 61.9 19.2
-5.8322 49.5802 6.1 10.4 28.2 6.8 600 62 19.3
-5.8122 49.5802 6.1 10.4 28.2 6.8 600 62 19.4
-5.7922 49.5802 6.1 10.3 28.2 6.9 600 62.2 19.5
-5.7721 49.5802 6.1 10.3 28.2 6.9 600 62.3 19.5
-5.7521 49.5802 6.1 10.3 28.1 6.8 600 62.1 19.6
-5.7321 49.5802 6.1 10.3 28 6.8 600 61.6 19.6
-5.7121 49.5802 6.1 10.3 28 6.8 600 61.4 19.5
-5.692 49.5802 6.1 10.3 28 6.8 600 61.5 19.5
-5.672 49.5802 6.1 10.3 27.9 6.8 600 61.6 19.6
-5.652 49.5802 6.1 10.3 27.9 6.8 600 61.7 19.7
-5.6319 49.5802 6.1 10.3 27.9 6.8 583 61.9 19.8
-5.6119 49.5802 6.1 10.3 27.8 6.8 575 62 19.9
-5.5919 49.5802 6.1 10.3 27.8 6.8 575 62 20
-5.5718 49.5802 6.1 10.3 27.7 6.8 575 62.1 20.2
-5.5518 49.5802 6.1 10.3 27.7 6.8 575 62 20.3
-5.5318 49.5802 6.1 10.3 27.7 6.9 575 61.8 20.4
-5.5117 49.5802 6.1 10.3 27.6 6.9 575 61.5 20.4
-5.4917 49.5802 6.1 10.3 27.6 6.9 575 61.4 20.6
-5.4717 49.5802 6.1 10.3 27.6 6.8 575 61.5 20.7
-5.4516 49.5802 6.1 10.3 27.5 6.8 575 61.5 20.8
-5.4316 49.5802 6.1 10.3 27.5 6.8 575 61.5 20.6
-5.4116 49.5802 6.1 10.3 27.5 6.8 575 61.3 20.4
-5.3915 49.5802 6.1 10.3 27.4 6.8 575 61.2 20.2
-5.3715 49.5802 6.1 10.3 27.4 6.7 570 61.2 19.9
-5.3515 49.5802 6.1 10.3 27.4 6.7 550 61.2 19.8
-5.3315 49.5802 6.1 10.3 27.3 6.7 550 61.2 19.6
-5.3114 49.5802 6.1 10.3 27.3 6.7 550 61.3 19.5
-5.2914 49.5802 6.1 10.3 27.2 6.7 550 61.3 19.3
-5.2714 49.5802 6.1 10.3 27.2 6.6 550 61.4 19.2
-5.2513 49.5802 6.1 10.3 27.2 6.6 550 61.5 19.1
-5.2313 49.5802 6.1 10.3 27.1 6.6 550 61.5 19
-5.2113 49.5802 6.1 10.3 27.1 6.6 550 61.6 18.9
-5.1912 49.5802 6.1 10.3 27 6.5 550 61.8 18.8
-5.1712 49.5802 6.1 10.3 26.9 6.5 550 61.9 18.8
-5.1512 49.5802 6.1 10.3 26.8 6.4 550 62.3 18.7
-5.1311 49.5802 6.1 10.3 26.8 6.4 550 62.6 18.6
-5.1111 49.5802 6.1 10.3 26.7 6.4 550 62.9 18.4
-5.0911 49.5802 6.1 10.3 26.6 6.3 532 63 18.4
-5.071 49.5802 6.1 10.3 26.6 6.3 525 63.1 18.3
-5.051 49.5802 6.1 10.3 26.5 6.3 525 63.1 18.3
-5.031 49.5802 6.1 10.3 26.4 6.2 525 63.3 18.2
-5.011 49.5802 6.2 10.3 26.4 6.2 525 63.4 18
-4.9909 49.5802 6.2 10.3 26.3 6.1 525 63.7 18
-4.9709 49.5802 6.2 10.3 26.2 6.1 525 64.2 18
-4.9509 49.5802 6.2 10.3 26.2 6.1 525 64.7 18
-4.9308 49.5802 6.2 10.3 26.1 6.1 525 64.9 18
-4.9108 49.5802 6.2 10.3 26 6 525 64.9 17.9
-4.8908 49.5802 6.2 10.3 25.9 6 525 65.1 17.9
-4.8707 49.5802 6.2 10.3 25.8 5.9 525 65.1 17.7
-4.8507 49.5802 6.2 10.3 25.7 5.9 525 65.2 17.6
-4.8307 49.5802 6.2 10.3 25.6 5.8 525 65.2 17.2
-4.8106 49.5802 6.2 10.3 25.5 5.8 525 65.3 17.1
-4.7906 49.5802 6.2 10.3 25.4 5.7 525 65.4 17
-4.7706 49.5802 6.2 10.3 25.4 5.7 525 65.4 16.9
-4.7505 49.5802 6.2 10.3 25.3 5.7 525 65.5 16.8
-4.7305 49.5802 6.2 10.3 25.2 5.6 525 65.6 16.7
-4.7105 49.5802 6.2 10.3 25.1 5.6 525 65.7 16.8
-4.6905 49.5802 6.2 10.3 25 5.5 525 65.8 16.8
-4.6704 49.5802 6.2 10.3 24.9 5.5 525 65.9 16.8
-4.6504 49.5802 6.2 10.3 24.8 5.5 525 66 16.9
-4.6304 49.5802 6.2 10.3 24.7 5.4 525 66 17
-4.6103 49.5802 6.2 10.3 24.6 5.4 525 66.1 17.1
-4.5903 49.5802 6.2 10.3 24.5 5.4 525 66.2 17.2
-4.5703 49.5802 6.2 10.3 24.4 5.4 525 66.4 17.3
-4.5502 49.5802 6.2 10.3 24.4 5.4 525 66.5 17.4
-4.5302 49.5802 6.2 10.3 24.3 5.4 506 66.6 17.5
-4.5102 49.5802 6.2 10.3 24.2 5.4 500 66.6 17.6
-4.4901 49.5802 6.2 10.3 24.1 5.4 500 66.7 17.7
-4.4701 49.5802 6.2 10.3 24.1 5.4 500 66.6 17.9
-4.4501 49.5802 6.2 10.3 24 5.4 500 66.3 17.9
-4.43 49.5802 6.2 10.3 23.9 5.3 500 66 18.1
-4.41 49.5802 6.2 10.3 23.8 5.3 500 65.9 18.2
-4.39 49.5802 6.2 10.3 23.8 5.3 500 65.9 18.4
-4.37 49.5802 6.2 10.3 23.7 5.4 500 65.9 18.6
-4.3499 49.5802 6.2 10.3 23.7 5.4 500 66 19
-4.3299 49.5802 6.2 10.3 23.6 5.4 500 66.1 19.3
-4.3099 49.5802 6.2 10.3 23.6 5.4 500 66.1 19.6
-4.2898 49.5802 6.2 10.3 23.5 5.4 500 66.2 19.7
-4.2698 49.5802 6.2 10.2 23.5 5.4 489 66.2 19.9
-4.2498 49.5802 6.2 10.2 23.5 5.5 450 66.3 20.2
-4.2297 49.5802 6.3 10.2 23.4 5.5 450 66.3 20.5
-4.2097 49.5802 6.3 10.2 23.4 5.5 450 66.4 20.8
-4.1897 49.5802 6.3 10.2 23.4 5.5 450 66.4 21.1
-4.1696 49.5802 6.3 10.2 23.3 5.5 450 66.5 21.4
-4.1496 49.5802 6.3 10.2 23.3 5.5 450 66.9 21.6
-4.1296 49.5802 6.3 10.2 23.2 5.6 450 67.4 22
-4.1095 49.5802 6.3 10.2 23.2 5.5 450 67.7 22.2
-4.0895 49.5802 6.3 10.1 23.3 5.5 450 67.8 22.4
-4.0695 49.5802 6.3 10.1 23.3 5.5 450 67.8 22.6
-4.0495 49.5802 6.3 10.1 23.3 5.5 450 67.8 22.7
-4.0294 49.5802 6.3 10 23.3 5.5 450 67.8 22.6
-4.0094 49.5802 6.3 10 23.4 5.5 450 67.8 22.5
-3.9894 49.5802 6.3 10 23.4 5.5 376 67.8 22.4
-3.9693 49.5802 6.3 10 23.4 5.5 350 67.8 22.5
-3.9493 49.5802 6.3 9.9 23.4 5.5 350 67.8 22.5
-3.9293 49.5802 6.3 9.9 23.4 5.5 350 67.8 22.4
-3.9092 49.5802 6.4 9.9 23.4 5.5 350 67.7 22.2
-3.8892 49.5802 6.4 9.8 23.5 5.5 350 67.7 22
-3.8692 49.5802 6.4 9.8 23.5 5.5 350 67.7 21.9
-3.8491 49.5802 6.4 9.8 23.4 5.6 350 67.7 21.8
-3.8291 49.5802 6.4 9.8 23.4 5.6 350 67.7 21.8
-3.8091 49.5802 6.4 9.8 23.4 5.6 350 67.6 21.8
-3.789 49.5802 6.4 9.7 23.4 5.6 350 67.6 21.9
-3.769 49.5802 6.4 9.7 23.4 5.6 350 67.6 21.9
-3.749 49.5802 6.4 9.7 23.4 5.6 350 67.6 22
-3.729 49.5802 6.4 9.7 23.4 5.6 350 67.6 22
-3.7089 49.5802 6.4 9.6 23.4 5.6 330 67.6 22.1
-3.6889 49.5802 6.4 9.6 23.3 5.6 275 67.5 22.1
-3.6689 49.5802 6.5 9.6 23.3 5.6 275 67.5 22.2
-3.6488 49.5802 6.5 9.6 23.3 5.6 275 67.5 22.2
-3.6288 49.5802 6.5 9.5 23.3 5.6 275 67.6 22.2
-3.6088 49.5802 6.5 9.5 23.3 5.5 275 67.8 22.2
-3.5887 49.5802 6.5 9.6 23.2 5.5 275 68.5 22.3
-3.5687 49.5802 6.5 9.6 23.1 5.5 275 69 22.4
-3.5487 49.5802 6.5 9.6 23 5.5 275 68.9 22.5
-3.5286 49.5802 6.5 9.6 22.9 5.5 275 68.9 22.9
-3.5086 49.5802 6.5 9.6 22.9 5.5 275 68.8 22.9
-3.4886 49.5802 6.5 9.6 22.8 5.4 275 68.8 22.6
-3.4685 49.5802 6.5 9.6 22.7 5.4 275 68.8 22.3
-3.4485 49.5802 6.5 9.6 22.7 5.4 275 69.4 22.2
-3.4285 49.5802 6.5 9.6 22.6 5.4 275 69.4 22.2
-3.4085 49.5802 6.5 9.6 22.6 5.4 275 69.3 22.3
-3.3884 49.5802 6.5 9.6 22.5 5.4 275 69.3 22.3
-3.3684 49.5802 6.5 9.6 22.4 5.3 275 69.2 22.4
-3.3484 49.5802 6.5 9.6 22.4 5.3 275 69 22.4
-3.3283 49.5802 6.5 9.6 22.3 5.3 275 68.8 22.3
-3.3083 49.5802 6.5 9.6 22.3 5.3 275 68.3 22.1
-3.2883 49.5802 6.5 9.6 22.3 5.2 275 68.1 22.1
-3.2682 49.5802 6.5 9.6 22.1 5.2 275 70.3 22.9
-3.2482 49.5802 6.5 9.6 22 5.1 275 71.3 23.3
-3.2282 49.5802 6.5 9.6 21.9 5.1 275 70.7 23.2
-3.2081 49.5802 6.5 9.7 21.7 5 275 70.5 22.8
-3.1881 49.5802 6.5 9.7 21.6 5 275 73.5 23.4
-3.1681 49.5802 6.5 9.7 21.4 5 295 76.4 24
-3.148 49.5802 6.5 9.7 21.3 4.9 350 76.9 24.1
-3.128 49.5802 6.5 9.8 21.2 4.9 350 76.2 24.1
-3.108 49.5802 6.5 9.8 21 4.8 350 75.7 24.1
-3.0879 49.5802 6.5 9.8 20.9 4.8 350 75.6 24.4
-3.0679 49.5802 6.5 9.8 21 4.8 350 75.4 24.6
-3.0479 49.5802 6.5 9.8 21 4.9 350 75.3 24.9
-3.0279 49.5802 6.5 9.7 21.1 5 350 75.3 25.2
-3.0078 49.5802 6.5 9.7 21.1 5 350 75.2 25.4
-2.9878 49.5802 6.5 9.7 21.1 5 350 75.2 25.8
-2.9678 49.5802 6.5 9.7 21.1 5.1 350 75.2 26.2
-2.9477 49.5802 6.5 9.7 21.1 5.2 350 75.2 26.4
-2.9277 49.5802 6.5 9.6 21.1 5.2 350 75.3 26.9
-2.9077 49.5802 6.5 9.6 21.1 5.2 350 75.3 27.2
-2.8876 49.5802 6.5 9.6 21.2 5.3 350 75.3 27.8
-2.8676 49.5802 6.5 9.6 21.2 5.3 309 75.4 28.4
-2.8476 49.5802 6.5 9.6 21.2 5.4 300 75.5 29.1
-2.8275 49.5802 6.5 9.5 21.2 5.4 300 75.6 29.7
-2.8075 49.5802 6.5 9.5 21.1 5.4 300 75.8 30.5
-2.7875 49.5802 6.5 9.5 21.1 5.4 300 76 31.2
-2.7674 49.5802 6.5 9.5 21 5.4 300 76.2 31.7
-2.7474 49.5802 6.5 9.5 20.9 5.3 300 76.6 32.1
-2.7274 49.5802 6.5 9.5 20.9 5.3 300 77.1 32.6
-2.7074 49.5802 6.5 9.5 21 5.3 300 77.9 32.9
-2.6873 49.5802 6.5 9.5 21 5.3 300 79 33.1
-2.6673 49.5802 6.5 9.5 21 5.3 300 79.5 33.2
-2.6473 49.5802 6.5 9.5 21 5.3 300 80.6 32.9
-2.6272 49.5802 6.5 9.5 21 5.3 300 81.4 32.5
-2.6072 49.5802 6.5 9.5 21 5.3 300 79.2 31.1
-2.5872 49.5802 6.5 9.5 21 5.3 300 71.4 28.1
-2.5671 49.5802 6.5 9.5 21 5.3 300 68.1 26.6
-2.5471 49.5802 6.5 9.5 21 5.3 300 69.8 27
-2.5271 49.5802 6.5 9.5 21 5.3 300 71.5 27.5
-2.507 49.5802 6.5 9.5 21 5.3 300 72.8 27.8
-2.487 49.5802 6.5 9.5 21 5.3 300 73.7 28
-2.467 49.5802 6.5 9.5 21 5.3 300 74.7 28.4
-2.4469 49.5802 6.5 9.5 21.1 5.4 300 75.7 28.7
-2.4269 49.5802 6.5 9.5 21.1 5.4 300 76.2 29.1
-2.4069 49.5802 6.5 9.5 21.1 5.4 300 77.2 29.6
-2.3869 49.5802 6.5 9.4 21.2 5.4 300 77.7 29.9
-2.3668 49.5802 6.5 9.4 21.2 5.5 300 77.4 29.8
-2.3468 49.5802 6.5 9.4 21.2 5.5 300 77.5 29.9
-2.3268 49.5802 6.5 9.4 21.3 5.5 279 81.7 31.6
-2.3067 49.5802 6.5 9.4 21.3 5.5 275 84.2 32.8
-2.2867 49.5802 6.5 9.4 21.3 5.5 275 83.9 33.1
-2.2667 49.5802 6.5 9.4 21.3 5.5 275 79 31.4
-2.2466 49.5802 6.5 9.4 21.2 5.5 275 70.1 28.3
-2.2266 49.5802 6.5 9.4 21.2 5.5 275 62.3 25.7
-2.2066 49.5802 6.5 9.4 21.2 5.5 288 61 25.3
-2.1865 49.5802 6.5 9.4 21.2 5.6 288 62.5 26.1
-2.1665 49.5802 6.5 9.3 21.2 5.5 288 64 26.9
-2.1465 49.5802 6.5 9.3 21.1 5.5 292 63.8 26.9
-2.1264 49.5802 6.5 9.3 21.1 5.5 300 65.6 27.7
-2.1064 49.5802 6.5 9.3 21 5.4 300 67.4 28.4
-2.0864 49.5802 6.5 9.3 21 5.4 300 70 29.3
-2.0664 49.5802 6.5 9.3 20.9 5.4 300 70.7 29.5
-2.0463 49.5802 6.5 9.3 20.9 5.4 300 67.6 28.3
-2.0263 49.5802 6.5 9.3 20.9 5.4 300 67.3 28.1
-2.0063 49.5802 6.5 9.3 20.9 5.4 300 67.9 28.4
-1.9862 49.5802 6.5 9.3 20.9 5.4 300 68 28.4
-1.9662 49.5802 6.5 9.3 20.9 5.5 300 67.7 28.3
-1.9462 49.5802 6.5 9.2 20.9 5.5 300 68.3 28.4
-1.9261 49.5802 6.5 9.2 20.9 5.5 300 70.9 29.2
-1.9061 49.5802 6.5 9.2 20.9 5.5 300 72.6 29.8
-1.8861 49.5802 6.5 9.2 20.9 5.5 300 72.2 30
-1.866 49.5802 6.5 9.2 20.9 5.6 300 71.3 30.4
-1.846 49.5802 6.5 9.2 20.9 5.6 300 72.9 31.6
-1.826 49.5802 6.5 9.2 20.9 5.6 300 75.1 32.9
-1.8059 49.5802 6.5 9.2 20.9 5.6 300 74.7 32.9
-1.7859 49.5802 6.5 9.2 20.9 5.6 300 74.3 32.6
-1.7659 49.5802 6.5 9.2 20.9 5.6 322 73.9 32.5
-1.7459 49.5802 6.5 9.2 20.9 5.6 325 73.8 32.7
-1.7258 49.5802 6.5 9.2 20.9 5.6 325 73.7 32.7
-1.7058 49.5802 6.5 9.2 20.8 5.6 325 73.6 32.7
-1.6858 49.5802 6.5 9.2 20.8 5.6 325 73.6 32.6
-1.6657 49.5802 6.5 9.2 20.8 5.6 325 73.6 32.5
-1.6457 49.5802 6.5 9.2 20.8 5.6 325 73.5 32.5
-1.6257 49.5802 6.5 9.2 20.8 5.6 325 73.5 32.4
-1.6056 49.5802 6.5 9.2 20.8 5.6 325 73.5 32.3
-1.5856 49.5802 6.5 9.2 20.8 5.6 325 73.5 32.6
-1.5656 49.5802 6.5 9.2 20.9 5.6 325 73.5 33.1
-1.5455 49.5802 6.5 9.2 20.9 5.6 325 73.4 33
-1.5255 49.5802 6.5 9.2 20.9 5.6 325 73.4 32.4
-1.5055 49.5802 6.5 9.2 20.9 5.6 325 73.3 31.9
-1.4854 49.5802 6.5 9.3 20.9 5.6 345 73.3 31.6
-1.4654 49.5802 6.5 9.3 20.9 5.6 375 73.3 31.4
-1.4454 49.5802 6.5 9.3 20.9 5.6 375 73.2 31.2
-1.4254 49.5802 6.4 9.3 20.9 5.5 375 73.2 31.1
-1.4053 49.5802 6.4 9.3 20.9 5.5 375 73.1 30.9
-1.3853 49.5802 6.4 9.3 20.9 5.5 375 73.1 30.8
-1.3653 49.5802 6.4 9.4 20.9 5.5 375 73.1 30.7
-1.3452 49.5802 6.4 9.4 21 5.5 375 73.1 30.6
-1.3252 49.5802 6.4 9.4 21 5.5 375 73.1 30.5
-1.3052 49.5802 6.4 9.4 21.1 5.5 375 73.1 30.7
-1.2851 49.5802 6.4 9.4 21.2 5.6 375 73.2 30.6
-1.2651 49.5802 6.4 9.4 21.3 5.6 375 73.4 30.2
-1.2451 49.5802 6.4 9.5 21.4 5.6 375 73.5 29.6
-1.225 49.5802 6.4 9.5 21.5 5.6 375 74.1 29.3
-1.205 49.5802 6.4 9.5 21.6 5.6 443 74.2 29
-1.185 49.5802 6.4 9.5 21.7 5.6 450 73.2 28.5
-1.1649 49.5802 6.4 9.5 21.9 5.6 450 69 27
-1.1449 49.5802 6.4 9.5 22 5.7 450 65.9 25.8
-1.1249 49.5802 6.4 9.6 22.1 5.7 450 64.8 25.1
-1.1049 49.5802 6.4 9.6 22.2 5.7 450 65.3 25
-1.0848 49.5802 6.4 9.6 22.3 5.7 450 65.7 24.8
-1.0648 49.5802 6.4 9.6 22.4 5.7 450 65.7 24.5
-1.0448 49.5802 6.4 9.6 22.5 5.7 450 65.8 24.3
-1.0247 49.5802 6.4 9.7 22.7 5.8 450 65.6 24.3
-1.0047 49.5802 6.4 9.7 22.8 5.8 450 65.5 24.2
-0.9847 49.5802 6.4 9.6 22.9 5.8 450 65.4 23.9
-0.9646 49.5802 6.4 9.6 23.1 5.9 450 65.4 23.6
-0.9446 49.5802 6.4 9.6 23.2 5.9 460 65.5 23.4
-0.9246 49.5802 6.4 9.6 23.4 5.9 475 65.4 23.1
-0.9045 49.5802 6.4 9.6 23.5 6 475 65.3 22.8
-0.8845 49.5802 6.4 9.6 23.7 6 475 65.2 22.6
-0.8645 49.5802 6.4 9.6 23.8 6.1 475 65 22.4
-0.8444 49.5802 6.4 9.6 24 6.1 475 64.7 22.2
-0.8244 49.5802 6.4 9.6 24.1 6.1 475 64.2 21.9
-0.8044 49.5802 6.4 9.6 24.3 6.1 475 63.6 21.7
-0.7844 49.5802 6.4 9.6 24.4 6.2 475 63 21.5
-0.7643 49.5802 6.4 9.6 24.4 6.2 475 61.5 21.1
-0.7443 49.5802 6.4 9.6 24.5 6.2 475 60.4 21
-0.7243 49.5802 6.4 9.6 24.6 6.3 475 64.3 22.7
-0.7042 49.5802 6.4 9.7 24.7 6.3 475 67.7 23.9
-0.6842 49.5802 6.4 9.7 24.8 6.3 475 68.1 23.8
-0.6642 49.5802 6.4 9.7 24.9 6.3 521 68.3 23.3
-0.6441 49.5802 6.4 9.7 24.9 6.3 525 68.4 23.2
-0.6241 49.5802 6.4 9.7 25 6.4 525 69.5 23.7
-0.6041 49.5802 6.4 9.7 25.1 6.4 525 74.4 25.2
-0.584 49.5802 6.4 9.7 25.2 6.4 525 83.1 27.8
-0.564 49.5802 6.4 9.8 25.3 6.4 525 76.3 26
-0.544 49.5802 6.4 9.8 25.4 6.5 525 64.7 22.6
-0.5239 49.5802 6.4 9.8 25.4 6.5 525 60.1 21
-0.5039 49.5802 6.4 9.8 25.5 6.5 525 61.5 20.9
-0.4839 49.5802 6.4 9.8 25.6 6.5 525 63.1 21.1
-0.4638 49.5802 6.4 9.8 25.6 6.5 525 63.6 21.6
-0.4438 49.5802 6.4 9.8 25.7 6.5 525 64.2 22.3
-0.4238 49.5802 6.4 9.8 25.7 6.5 525 64.4 21.9
-0.4038 49.5802 6.4 9.8 25.8 6.5 525 64.6 21.2
-0.3837 49.5802 6.4 9.8 25.8 6.6 536 64.7 20.7
-0.3637 49.5802 6.4 9.8 25.9 6.6 550 64.8 20.4
-0.3437 49.5802 6.4 9.8 26 6.6 550 64.9 20.2
-0.3236 49.5802 6.4 9.8 26 6.6 550 64.9 20.1
-0.3036 49.5802 6.4 9.8 26.1 6.6 550 64.9 19.9
-0.2836 49.5802 6.4 9.8 26.1 6.6 550 65 19.8
-0.2635 49.5802 6.4 9.8 26.2 6.6 550 65 19.7
-0.2435 49.5802 6.4 9.8 26.2 6.6 550 65 19.6
-0.2235 49.5802 6.4 9.8 26.3 6.6 550 65 19.5
-0.2034 49.5802 6.4 9.8 26.3 6.6 550 64.9 19.5
-0.1834 49.5802 6.4 9.8 26.3 6.6 550 64.9 19.4
-0.1634 49.5802 6.4 9.8 26.3 6.6 550 64.9 19.4
-0.1433 49.5802 6.4 9.8 26.3 6.6 550 64.9 19.4
-0.1233 49.5802 6.4 9.8 26.3 6.6 550 64.9 19.2
-0.1033 49.5802 6.4 9.8 26.4 6.6 574 64.9 19
-0.0833 49.5802 6.4 9.8 26.4 6.6 575 64.8 19.1
-0.0632 49.5802 6.4 9.8 26.4 6.6 575 64.8 19.2
-0.0432 49.5802 6.4 9.8 26.4 6.6 575 64.8 19.1
-0.0232 49.5802 6.4 9.8 26.5 6.6 575 64.8 19
-0.0031 49.5802 6.4 9.8 26.5 6.7 575 64.7 19.1
0.0169 49.5802 6.4 9.8 26.6 6.7 575 64.7 19.1
0.0369 49.5802 6.4 9.8 26.7 6.7 575 64.7 19.2
0.057 49.5802 6.4 9.8 26.7 6.7 575 64.7 19.4
0.077 49.5802 6.4 9.9 26.7 6.8 575 64.6 19.7
0.097 49.5802 6.5 10 26.8 6.8 575 64.6 19.9
0.1171 49.5802 6.5 10 26.8 6.8 575 64.5 19.9
0.1371 49.5802 6.5 10.1 26.9 6.8 575 64.5 19.8
0.1571 49.5802 6.5 10.1 26.9 6.9 575 64.5 19.7
0.1772 49.5802 6.5 10.2 26.9 6.9 575 64.4 19.6
0.1972 49.5802 6.5 10.3 27 6.9 575 64.4 19.7
0.2172 49.5802 6.5 10.3 27.1 7 575 64.4 19.8
0.2372 49.5802 6.5 10.3 27.1 7 575 64.3 19.9
0.2573 49.5802 6.5 10.3 27.1 7 575 64.3 20
0.2773 49.5802 6.5 10.3 27.2 7 575 64.2 20.1
0.2973 49.5802 6.5 10.3 27.2 7.1 575 64.2 20.1
0.3174 49.5802 6.5 10.2 27.3 7.1 575 64.2 20.2
0.3374 49.5802 6.5 10.2 27.3 7.1 575 64.2 20.2
0.3574 49.5802 6.5 10.1 27.3 7.1 575 64.1 20.2
0.3775 49.5802 6.5 10 27.4 7.1 575 64.1 20.3
0.3975 49.5802 6.5 9.9 27.4 7.1 575 64.1 20.3
0.4175 49.5802 6.5 9.9 27.4 7.1 575 64 20.2
0.4376 49.5802 6.4 9.8 27.4 7.1 599 64 20.1
0.4576 49.5802 6.4 9.7 27.5 7.1 600 64 20
0.4776 49.5802 6.4 9.7 27.5 7.1 600 64 20
0.4977 49.5802 6.4 9.7 27.6 7.2 600 63.9 20.1
0.5177 49.5802 6.4 9.7 27.6 7.2 600 63.9 20.1
0.5377 49.5802 6.4 9.7 27.6 7.2 600 63.9 20.2
0.5577 49.5802 6.4 9.7 27.7 7.2 600 63.9 20.3
0.5778 49.5802 6.4 9.7 27.7 7.3 600 63.8 20.4
0.5978 49.5802 6.4 9.7 27.7 7.3 594 63.8 20.6
0.6178 49.5802 6.4 9.7 27.8 7.3 587 63.8 20.7
0.6379 49.5802 6.4 9.6 27.8 7.3 587 63.8 20.9
0.6579 49.5802 6.4 9.6 27.8 7.4 575 63.8 21.1
0.6779 49.5802 6.4 9.6 27.9 7.4 575 63.8 21.2
0.698 49.5802 6.4 9.6 27.9 7.4 575 63.7 21.4
0.718 49.5802 6.4 9.6 28 7.4 587 63.7 21.5
0.738 49.5802 6.4 9.6 28 7.5 600 63.7 21.6
0.7581 49.5802 6.4 9.6 28 7.5 587 63.7 21.7
0.7781 49.5802 6.4 9.6 28.1 7.5 587 63.7 21.8
0.7981 49.5802 6.4 9.6 28.1 7.5 587 63.7 21.9
0.8182 49.5802 6.4 9.6 28.1 7.6 575 63.7 22
0.8382 49.5802 6.4 9.6 28.1 7.6 575 63.6 22.1
0.8582 49.5802 6.4 9.6 28.2 7.6 575 63.6 22.1
0.8782 49.5802 6.4 9.6 28.2 7.7 575 63.6 22
0.8983 49.5802 6.4 9.6 28.2 7.7 575 63.6 21.9
0.9183 49.5802 6.4 9.6 28.2 7.7 575 63.6 21.9
0.9383 49.5802 6.4 9.6 28.2 7.8 575 63.6 21.7
0.9584 49.5802 6.4 9.6 28.2 7.8 575 63.6 21.4
0.9784 49.5802 6.4 9.6 28.2 7.7 575 63.6 21.1
0.9984 49.5802 6.4 9.6 28.2 7.7 575 63.6 20.8
1.0185 49.5802 6.4 9.6 28.1 7.6 600 63.6 20.6
1.0385 49.5802 6.4 9.6 28.1 7.6 600 63.6 20.4
1.0585 49.5802 6.4 9.6 28 7.5 600 63.5 20.3
1.0786 49.5802 6.4 9.6 28 7.5 600 63.5 20.3
1.0986 49.5802 6.4 9.6 28 7.4 600 63.5 20.3
1.1186 49.5802 6.4 9.6 27.9 7.4 600 63.5 20.2
1.1387 49.5802 6.4 9.6 27.9 7.3 600 63.5 20.4
1.1587 49.5802 6.5 9.6 27.9 7.4 600 63.5 20.5
1.1787 49.5802 6.4 9.6 28 7.4 600 63.5 20.7
1.1987 49.5802 6.4 9.6 28 7.4 600 63.5 21.2
1.2188 49.5802 6.5 9.6 28 7.4 600 63.4 21.6
1.2388 49.5802 6.5 9.6 28.1 7.4 600 63.4 21.5
1.2588 49.5802 6.5 9.6 28.1 7.4 600 63.4 21.1
1.2789 49.5802 6.5 9.6 28.1 7.4 600 63.4 20.9
1.2989 49.5802 6.5 9.6 28.1 7.4 600 63.4 21
1.3189 49.5802 6.5 9.6 28.1 7.4 600 63.4 21
1.339 49.5802 6.5 9.5 28.1 7.4 600 63.4 21
1.359 49.5802 6.5 9.5 28.1 7.4 600 63.4 20.9
1.379 49.5802 6.5 9.5 28.2 7.4 600 63.4 20.8
1.3991 49.5802 6.5 9.5 28.2 7.4 600 63.4 20.7
1.4191 49.5802 6.5 9.5 28.2 7.4 600 63.4 20.7
1.4391 49.5802 6.5 9.5 28.2 7.3 600 63.3 20.7
1.4592 49.5802 6.5 9.5 28.2 7.3 600 63.3 20.8
1.4792 49.5802 6.5 9.5 28.2 7.3 600 63.3 21
1.4992 49.5802 6.5 9.5 28.2 7.3 600 63.3 21.1
1.5192 49.5802 6.5 9.5 28.2 7.3 600 63.3 20.9
1.5393 49.5802 6.5 9.5 28.3 7.3 600 63.3 20.6
1.5593 49.5802 6.5 9.5 28.3 7.3 600 63.3 20.4
1.5793 49.5802 6.5 9.5 28.3 7.4 600 63.3 20.2
1.5994 49.5802 6.5 9.5 28.3 7.4 600 63.3 20.2
1.6194 49.5802 6.5 9.5 28.4 7.4 600 63.3 20.1
1.6394 49.5802 6.5 9.5 28.4 7.4 600 63.3 20.1
1.6595 49.5802 6.5 9.5 28.4 7.4 600 63.2 20.1
1.6795 49.5802 6.5 9.5 28.4 7.4 600 63.2 20.2
1.6995 49.5802 6.5 9.4 28.5 7.4 600 63.2 20.4
1.7196 49.5802 6.5 9.4 28.6 7.5 600 63.2 20.6
1.7396 49.5802 6.5 9.4 28.6 7.6 600 63.1 21
1.7596 49.5802 6.5 9.4 28.6 7.6 600 63.1 21.5
1.7797 49.5802 6.5 9.4 28.7 7.7 600 63.1 21.9
1.7997 49.5802 6.5 9.3 28.8 7.8 600 63.1 22.4
1.8197 49.5802 6.5 9.3 28.9 7.9 600 63 23.2
1.8397 49.5802 6.5 9.3 28.9 8 558 63 24.4
1.8598 49.5802 6.5 9.3 29 8.1 525 62.9 25.1
1.8798 49.5802 6.5 9.3 29 8.1 525 62.9 25.5
1.8998 49.5802 6.5 9.3 29.1 8.2 525 62.9 25.8
1.9199 49.5802 6.5 9.2 29.1 8.3 525 62.8 26.5
1.9399 49.5802 6.5 9.2 29.2 8.4 525 62.8 27.1
1.9599 49.5802 6.6 9.3 29.2 8.4 525 62.8 27.9
1.98 49.5802 6.6 9.3 29.3 8.5 525 62.7 29.2
2 49.5802 6.6 9.3 29.5 8.6 525 62.7 30.5
-10.8 49.6002 6.3 10.1 30.3 7.6 550 59 19.5
-10.78 49.6002 6.3 10.1 30.3 7.6 550 59.1 20
-10.7599 49.6002 6.3 10.1 30.4 7.6 550 59.1 20.7
-10.7399 49.6002 6.3 10.1 30.5 7.7 550 59.2 21.1
-10.7199 49.6002 6.3 10.1 30.6 7.8 550 59.2 21.3
-10.6998 49.6002 6.3 10.1 30.7 7.9 550 59.1 21.5
-10.6798 49.6002 6.3 10.1 30.8 8 550 59.1 22.1
-10.6598 49.6002 6.3 10.1 30.9 8.1 550 59 22.9
-10.6397 49.6002 6.3 10.1 31 8.2 550 59 23.7
-10.6197 49.6002 6.3 10.1 31.1 8.3 550 58.9 24.4
-10.5997 49.6002 6.3 10.1 31.2 8.4 550 58.7 25.3
-10.5797 49.6002 6.3 10.1 31.4 8.6 550 58.6 26.1
-10.5596 49.6002 6.3 10.1 31.5 8.7 550 58.5 26.6
-10.5396 49.6002 6.3 10.1 31.6 8.8 550 58.4 27.1
-10.5196 49.6002 6.3 10.1 31.7 8.9 550 58.2 27.7
-10.4995 49.6002 6.3 10.1 31.8 8.9 550 58.2 28.5
-10.4795 49.6002 6.3 10.1 31.9 9 550 58.4 29.4
-10.4595 49.6002 6.3 10.1 31.9 9 550 58.6 30.3
-10.4394 49.6002 6.3 10.1 32 9.1 550 58.7 31
-10.4194 49.6002 6.3 10.1 32 9.1 550 58.7 31.3
-10.3994 49.6002 6.3 10.1 32.1 9.2 550 58.7 31.4
-10.3793 49.6002 6.3 10.1 32.1 9.3 550 58.7 31.8
-10.3593 49.6002 6.3 10.1 32.2 9.4 550 58.6 32.4
-10.3393 49.6002 6.3 10.1 32.2 9.4 574 58.6 33.1
-10.3192 49.6002 6.3 10.1 32.3 9.5 575 58.6 34.1
-10.2992 49.6002 6.3 10.2 32.3 9.5 575 58.6 35.2
-10.2792 49.6002 6.3 10.2 32.4 9.6 575 58.6 36.2
-10.2592 49.6002 6.3 10.2 32.4 9.6 575 58.6 37
-10.2391 49.6002 6.3 10.2 32.5 9.7 575 58.5 37.8
-10.2191 49.6002 6.3 10.2 32.5 9.8 575 58.5 38.5
-10.1991 49.6002 6.3 10.2 32.5 9.8 575 58.5 39.1
-10.179 49.6002 6.3 10.2 32.6 9.7 575 58.4 39.6
-10.159 49.6002 6.3 10.2 32.6 9.7 575 58.4 38.7
-10.139 49.6002 6.3 10.2 32.6 9.7 575 58.4 37.3
-10.1189 49.6002 6.2 10.2 32.6 9.7 575 58.4 35.9
-10.0989 49.6002 6.2 10.2 32.6 9.7 575 58.8 35.2
-10.0789 49.6002 6.2 10.2 32.6 9.7 586 59.2 34.5
-10.0588 49.6002 6.2 10.2 32.6 9.6 600 59.5 33.9
-10.0388 49.6002 6.2 10.2 32.6 9.6 600 59.4 33.4
-10.0188 49.6002 6.2 10.2 32.7 9.6 600 59.4 32.8
-9.9987 49.6002 6.2 10.3 32.7 9.6 600 59.3 32.7
-9.9787 49.6002 6.2 10.3 32.7 9.6 600 59.3 32.8
-9.9587 49.6002 6.2 10.3 32.7 9.6 600 59.2 33.1
-9.9387 49.6002 6.2 10.3 32.7 9.6 600 59.6 32.8
-9.9186 49.6002 6.2 10.3 32.7 9.5 600 60.2 32.2
-9.8986 49.6002 6.2 10.3 32.7 9.5 600 60.6 31.9
-9.8786 49.6002 6.2 10.3 32.7 9.5 600 60.6 31.6
-9.8585 49.6002 6.2 10.3 32.7 9.4 600 60.6 31.3
-9.8385 49.6002 6.2 10.3 32.7 9.4 600 60.7 31.1
-9.8185 49.6002 6.2 10.3 32.6 9.4 600 60.7 30.8
-9.7984 49.6002 6.2 10.3 32.6 9.3 600 60.6 30.5
-9.7784 49.6002 6.2 10.3 32.6 9.3 625 60.5 30.1
-9.7584 49.6002 6.2 10.3 32.6 9.3 625 60.5 29.3
-9.7383 49.6002 6.2 10.3 32.6 9.3 625 60.5 28.6
-9.7183 49.6002 6.2 10.3 32.6 9.2 625 60.5 28.3
-9.6983 49.6002 6.2 10.3 32.6 9.2 625 60.5 28.1
-9.6782 49.6002 6.2 10.3 32.6 9.2 625 60.5 28
-9.6582 49.6002 6.2 10.3 32.5 9.2 625 60.5 28.2
-9.6382 49.6002 6.2 10.3 32.5 9.2 625 60.5 28.5
-9.6182 49.6002 6.2 10.3 32.5 9.2 625 60.5 28.7
-9.5981 49.6002 6.2 10.3 32.5 9.3 625 60.5 28.8
-9.5781 49.6002 6.2 10.3 32.5 9.3 625 60.5 28.8
-9.5581 49.6002 6.2 10.3 32.5 9.3 625 60.5 29.1
-9.538 49.6002 6.2 10.3 32.5 9.3 625 60.5 29.5
-9.518 49.6002 6.2 10.3 32.5 9.3 625 60.5 29.9
-9.498 49.6002 6.2 10.3 32.4 9.3 625 60.5 30.6
-9.4779 49.6002 6.2 10.3 32.4 9.4 625 60.5 31.4
-9.4579 49.6002 6.2 10.3 32.4 9.4 625 60.5 32.3
-9.4379 49.6002 6.2 10.3 32.4 9.4 625 60.5 32.8
-9.4178 49.6002 6.2 10.3 32.4 9.4 625 60.5 32.9
-9.3978 49.6002 6.2 10.3 32.4 9.4 625 60.5 32.8
-9.3778 49.6002 6.2 10.3 32.3 9.4 625 60.5 33.4
-9.3577 49.6002 6.2 10.3 32.3 9.4 625 60.5 34.3
-9.3377 49.6002 6.2 10.4 32.3 9.4 625 60.6 35.1
-9.3177 49.6002 6.2 10.4 32.3 9.4 625 60.6 35.2
-9.2977 49.6002 6.2 10.4 32.2 9.4 625 60.6 35.2
-9.2776 49.6002 6.2 10.4 32.2 9.4 625 60.6 35.1
-9.2576 49.6002 6.2 10.4 32.2 9.4 625 60.5 34.9
-9.2376 49.6002 6.2 10.3 32.1 9.5 625 60.1 34.6
-9.2175 49.6002 6.2 10.3 32.1 9.5 625 59.9 34.8
-9.1975 49.6002 6.2 10.4 32.1 9.5 625 59.9 35.2
-9.1775 49.6002 6.2 10.3 32.1 9.5 625 59.9 35.4
-9.1574 49.6002 6.2 10.4 32 9.5 625 59.9 35.5
-9.1374 49.6002 6.2 10.3 32 9.5 625 60 35.6
-9.1174 49.6002 6.2 10.3 32 9.5 625 60.4 35.6
-9.0973 49.6002 6.2 10.3 32 9.4 625 60.4 35.6
-9.0773 49.6002 6.2 10.3 32 9.4 625 60.4 35.7
-9.0573 49.6002 6.2 10.3 31.9 9.4 625 60.4 35.5
-9.0372 49.6002 6.2 10.3 31.9 9.4 625 60.4 34.7
-9.0172 49.6002 6.2 10.3 31.9 9.4 625 60.3 33.8
-8.9972 49.6002 6.2 10.3 31.8 9.3 625 60.3 33.1
-8.9772 49.6002 6.2 10.3 31.8 9.3 625 60.3 32.5
-8.9571 49.6002 6.2 10.3 31.7 9.3 625 60.2 32.6
-8.9371 49.6002 6.2 10.3 31.7 9.3 625 60.1 32.5
-8.9171 49.6002 6.2 10.3 31.7 9.2 625 60.1 32.2
-8.897 49.6002 6.2 10.3 31.6 9.2 625 60.1 31.9
-8.877 49.6002 6.2 10.3 31.6 9.2 625 60 31.7
-8.857 49.6002 6.1 10.3 31.5 9.2 625 59.9 31.4
-8.8369 49.6002 6.1 10.3 31.4 9.1 625 59.8 31.2
-8.8169 49.6002 6.1 10.3 31.4 9.2 625 59.7 31.9
-8.7969 49.6002 6.1 10.3 31.4 9.2 625 59.6 32.3
-8.7768 49.6002 6.1 10.3 31.5 9.3 625 59.5 33.1
-8.7568 49.6002 6.1 10.3 31.5 9.4 625 59.3 34
-8.7368 49.6002 6.1 10.3 31.5 9.4 625 59.2 34.8
-8.7167 49.6002 6.1 10.3 31.5 9.5 625 58.8 36.4
-8.6967 49.6002 6.1 10.2 31.5 9.6 625 58.3 38.3
-8.6767 49.6002 6.1 10.2 31.6 9.6 600 58.6 40
-8.6567 49.6002 6.1 10.2 31.6 9.7 600 61 43.7
-8.6366 49.6002 6.1 10.2 31.6 9.7 600 62.5 47.1
-8.6166 49.6002 6.1 10.2 31.6 9.8 600 63 50.4
-8.5966 49.6002 6.1 10.2 31.6 9.9 600 62.6 54
-8.5765 49.6002 6.1 10.2 31.6 9.9 600 62.4 56.7
-8.5565 49.6002 6.1 10.2 31.5 9.9 600 62.1 59
-8.5365 49.6002 6.1 10.2 31.5 9.9 600 62 62
-8.5164 49.6002 6.1 10.2 31.4 9.8 600 61.8 65.4
-8.4964 49.6002 6.1 10.2 31.4 9.8 600 61.5 67
-8.4764 49.6002 6.1 10.2 31.3 9.7 600 61.9 66.9
-8.4563 49.6002 6.1 10.2 31.2 9.7 600 65 71.8
-8.4363 49.6002 6.1 10.2 31.2 9.7 600 66.3 71.2
-8.4163 49.6002 6.1 10.2 31.1 9.6 600 66.6 68.9
-8.3962 49.6002 6.1 10.2 31 9.6 600 66.6 67.3
-8.3762 49.6002 6.1 10.2 31 9.6 600 63.9 64.2
-8.3562 49.6002 6.1 10.2 30.9 9.5 600 60.8 60.5
-8.3362 49.6002 6.1 10.2 30.8 9.5 600 58.7 57.2
-8.3161 49.6002 6.1 10.2 30.8 9.5 600 58.8 55.6
-8.2961 49.6002 6.1 10.2 30.9 9.6 600 59.2 54.2
-8.2761 49.6002 6.1 10.2 30.9 9.7 600 59.5 53
-8.256 49.6002 6.1 10.2 30.8 9.7 600 59.7 52.1
-8.236 49.6002 6.1 10.2 30.8 9.6 600 59.9 51.1
-8.216 49.6002 6.1 10.2 30.7 9.6 600 59.9 49.7
-8.1959 49.6002 6.1 10.2 30.7 9.5 600 59.9 48.2
-8.1759 49.6002 6.1 10.2 30.6 9.5 600 59.3 47.1
-8.1559 49.6002 6.1 10.2 30.5 9.5 600 58.7 46.2
-8.1358 49.6002 6.1 10.2 30.5 9.4 600 58.3 45.6
-8.1158 49.6002 6.1 10.2 30.4 9.4 600 58.3 45.1
-8.0958 49.6002 6.1 10.1 30.3 9.3 600 58.3 44.7
-8.0757 49.6002 6.1 10.1 30.3 9.3 600 58.3 44.1
-8.0557 49.6002 6.1 10.1 30.2 9.2 600 58.3 43.6
-8.0357 49.6002 6.1 10.1 30.2 9.2 600 58.3 43
-8.0156 49.6002 6.1 10.1 30.2 9.2 600 58.2 42.1
-7.9956 49.6002 6.1 10.1 30.1 9.2 600 58 41.7
-7.9756 49.6002 6.1 10.1 30.1 9.1 600 57.9 42
-7.9556 49.6002 6.1 10.1 30 9.1 600 57.7 42.4
-7.9355 49.6002 6.1 10.1 30 9.1 600 57.7 42.6
-7.9155 49.6002 6.1 10.1 29.9 9.1 600 57.9 42.7
-7.8955 49.6002 6.1 10.2 29.9 9.1 600 58.8 43
-7.8754 49.6002 6.1 10.2 29.9 9.1 600 60.7 44.2
-7.8554 49.6002 6.1 10.2 29.8 9.1 614 62.1 45.4
-7.8354 49.6002 6.1 10.2 29.8 9.1 625 61.5 45.8
-7.8153 49.6002 6.1 10.2 29.8 9.1 625 61.5 46.6
-7.7953 49.6002 6.1 10.2 29.8 9.1 625 63.4 48.1
-7.7753 49.6002 6.1 10.2 29.7 9.1 625 65 49.3
-7.7552 49.6002 6.1 10.2 29.7 9.1 625 64.7 49.5
-7.7352 49.6002 6.1 10.2 29.7 9.1 625 64.2 49.9
-7.7152 49.6002 6.1 10.2 29.7 9.2 625 63.9 50.8
-7.6951 49.6002 6.1 10.2 29.7 9.2 625 63.8 52.1
-7.6751 49.6002 6.1 10.2 29.8 9.2 625 63.6 53.2
-7.6551 49.6002 6.1 10.2 29.8 9.3 625 63.5 53.9
-7.6351 49.6002 6.1 10.2 29.8 9.3 625 63.3 54.7
-7.615 49.6002 6.1 10.2 29.8 9.3 625 63.2 55.7
-7.595 49.6002 6.1 10.2 29.8 9.4 624 63.2 57.5
-7.575 49.6002 6.1 10.2 29.9 9.4 600 63.1 59.4
-7.5549 49.6002 6.1 10.2 29.9 9.5 600 63.1 61.4
-7.5349 49.6002 6.1 10.2 29.9 9.5 600 63 63.7
-7.5149 49.6002 6.1 10.1 29.9 9.5 600 63 65.7
-7.4948 49.6002 6.1 10.1 29.9 9.6 600 62.9 67.3
-7.4748 49.6002 6.1 10.1 30 9.6 600 62.9 68.8
-7.4548 49.6002 6.1 10.1 30 9.6 600 62.9 70.4
-7.4347 49.6002 6.1 10.1 30 9.7 600 62.9 71.7
-7.4147 49.6002 6.1 10.1 29.9 9.6 600 62.9 72.5
-7.3947 49.6002 6.1 10.1 29.9 9.6 600 62.9 72.5
-7.3746 49.6002 6.1 10.1 29.8 9.6 600 62.9 71.2
-7.3546 49.6002 6.1 10.1 29.8 9.5 600 62.9 69.6
-7.3346 49.6002 6.1 10.2 29.7 9.5 600 63 68.3
-7.3146 49.6002 6.1 10.2 29.7 9.4 600 63 67.9
-7.2945 49.6002 6.1 10.2 29.6 9.4 600 63 67.6
-7.2745 49.6002 6.1 10.2 29.6 9.4 600 63.1 67.3
-7.2545 49.6002 6.1 10.2 29.5 9.3 600 63.1 66.5
-7.2344 49.6002 6.1 10.2 29.5 9.3 600 63.2 65.5
-7.2144 49.6002 6 10.2 29.5 9.3 600 63.2 63.8
-7.1944 49.6002 6 10.2 29.4 9.2 600 63.3 61.8
-7.1743 49.6002 6 10.2 29.4 9.2 600 63.4 59.8
-7.1543 49.6002 6.1 10.2 29.2 9.1 600 63.5 57
-7.1343 49.6002 6.1 10.2 29.1 9 600 63.5 54
-7.1142 49.6002 6 10.2 29 8.8 600 63.6 51.1
-7.0942 49.6002 6.1 10.3 28.9 8.7 600 63.7 48.1
-7.0742 49.6002 6.1 10.3 28.8 8.6 600 63.8 45.1
-7.0541 49.6002 6.1 10.3 28.7 8.5 600 63.8 42.1
-7.0341 49.6002 6.1 10.3 28.6 8.3 605 63.9 39.3
-7.0141 49.6002 6.1 10.3 28.5 8.2 650 64 36.9
-6.9941 49.6002 6.1 10.3 28.4 8.1 650 64 34.8
-6.974 49.6002 6.1 10.4 28.2 8 650 64.1 33.3
-6.954 49.6002 6.1 10.4 28.1 7.9 650 64.2 31.8
-6.934 49.6002 6.1 10.4 28 7.7 650 64.2 30.7
-6.9139 49.6002 6.1 10.4 27.9 7.6 650 64.3 29.9
-6.8939 49.6002 6.1 10.4 27.9 7.5 650 64.3 29.3
-6.8739 49.6002 6.1 10.4 27.9 7.5 650 64.3 29.2
-6.8538 49.6002 6.1 10.4 28 7.6 650 64.4 29.1
-6.8338 49.6002 6.1 10.4 28.1 7.7 650 64.4 29.2
-6.8138 49.6002 6.1 10.4 28.3 7.8 650 64.4 29.6
-6.7937 49.6002 6.1 10.4 28.4 7.8 650 64.4 30
-6.7737 49.6002 6.1 10.4 28.5 7.9 650 64.4 30.4
-6.7537 49.6002 6.1 10.4 28.6 7.9 635 64.4 31.1
-6.7336 49.6002 6.1 10.3 28.7 8 625 64.4 31.7
-6.7136 49.6002 6.1 10.3 28.8 8 625 64.5 32.4
-6.6936 49.6002 6.1 10.3 28.9 8.1 625 64.5 33.1
-6.6736 49.6002 6.1 10.3 29 8.2 625 64.5 33.8
-6.6535 49.6002 6.1 10.3 29 8.2 625 64.6 34.3
-6.6335 49.6002 6.1 10.3 29.2 8.3 625 64.6 34.8
-6.6135 49.6002 6.1 10.3 29.2 8.3 625 64.7 35.1
-6.5934 49.6002 6.1 10.3 29.2 8.3 625 64.7 35.4
-6.5734 49.6002 6.1 10.3 29.2 8.2 625 64.8 35.6
-6.5534 49.6002 6.1 10.3 29.2 8.2 625 64.9 35.2
-6.5333 49.6002 6.1 10.3 29.2 8.1 625 65.1 34
-6.5133 49.6002 6.1 10.3 29.2 8.1 625 65.2 32.9
-6.4933 49.6002 6.1 10.3 29.2 8 625 65.3 31.9
-6.4732 49.6002 6.1 10.3 29.2 8 625 65.5 31.1
-6.4532 49.6002 6.1 10.3 29.2 8 625 65.6 30.3
-6.4332 49.6002 6.1 10.3 29.2 7.9 625 65.8 29.6
-6.4131 49.6002 6.1 10.3 29.2 7.9 625 66 29
-6.3931 49.6002 6.1 10.3 29.2 7.8 625 65.8 28.3
-6.3731 49.6002 6.1 10.3 29.2 7.8 625 64.7 27.4
-6.3531 49.6002 6.1 10.3 29.2 7.7 625 65.1 26.9
-6.333 49.6002 6.1 10.3 29.1 7.7 625 65.6 26.4
-6.313 49.6002 6.1 10.3 29.1 7.6 625 66.1 25.9
-6.293 49.6002 6.1 10.3 29.1 7.6 625 66.6 25.5
-6.2729 49.6002 6.1 10.3 29 7.5 625 65.8 24.7
-6.2529 49.6002 6.1 10.3 28.9 7.4 625 63.3 23.3
-6.2329 49.6002 6.1 10.4 28.8 7.3 625 59.8 21.7
-6.2128 49.6002 6.1 10.4 28.7 7.2 625 59.1 20.9
-6.1928 49.6002 6.1 10.4 28.7 7.1 641 59.6 20.4
-6.1728 49.6002 6.1 10.4 28.6 7 650 59.9 19.9
-6.1527 49.6002 6.1 10.4 28.5 6.9 650 60.2 19.5
-6.1327 49.6002 6.1 10.4 28.4 6.9 650 60.4 19.1
-6.1127 49.6002 6.1 10.4 28.4 6.8 650 60.7 18.8
-6.0926 49.6002 6.1 10.4 28.3 6.7 650 61 18.7
-6.0726 49.6002 6.1 10.4 28.2 6.6 650 61.4 18.5
-6.0526 49.6002 6.1 10.4 28.2 6.5 650 61.2 18.3
-6.0326 49.6002 6.1 10.4 28.1 6.5 650 61.4 18.3
-6.0125 49.6002 6.1 10.4 28.1 6.5 650 61.5 18.4
-5.9925 49.6002 6.1 10.4 28.2 6.6 650 61.7 18.5
-5.9725 49.6002 6.1 10.4 28.2 6.6 650 61.8 18.5
-5.9524 49.6002 6.1 10.4 28.2 6.6 650 61.9 18.6
-5.9324 49.6002 6.1 10.4 28.2 6.6 643 62.1 18.7
-5.9124 49.6002 6.1 10.4 28.2 6.7 600 62.2 18.8
-5.8923 49.6002 6.1 10.4 28.2 6.7 600 62.3 18.9
-5.8723 49.6002 6.1 10.4 28.2 6.7 600 62.4 19
-5.8523 49.6002 6.1 10.4 28.2 6.8 600 62.5 19.2
-5.8322 49.6002 6.1 10.4 28.2 6.8 600 62.6 19.3
-5.8122 49.6002 6.1 10.3 28.2 6.8 600 62.7 19.5
-5.7922 49.6002 6.1 10.3 28.2 6.8 600 62.7 19.6
-5.7721 49.6002 6.1 10.3 28.2 6.8 600 62.5 19.5
-5.7521 49.6002 6.1 10.3 28.2 6.8 600 61.9 19.5
-5.7321 49.6002 6.1 10.3 28.1 6.8 600 61.5 19.5
-5.7121 49.6002 6.1 10.3 28.1 6.8 600 61.5 19.6
-5.692 49.6002 6.1 10.3 28 6.9 600 61.6 19.6
-5.672 49.6002 6.1 10.3 28 6.9 600 61.7 19.7
-5.652 49.6002 6.1 10.3 28 6.9 600 61.9 19.8
-5.6319 49.6002 6.1 10.3 27.9 6.9 583 62 19.9
-5.6119 49.6002 6.1 10.3 27.9 6.9 575 61.8 20
-5.5919 49.6002 6.1 10.3 27.8 6.9 575 61.8 20.2
-5.5718 49.6002 6.1 10.3 27.8 6.9 575 61.9 20.4
-5.5518 49.6002 6.1 10.3 27.8 6.9 575 61.9 20.5
-5.5318 49.6002 6.1 10.3 27.7 6.9 575 61.6 20.5
-5.5117 49.6002 6.1 10.3 27.7 6.9 575 61.5 20.6
-5.4917 49.6002 6.1 10.3 27.7 6.9 575 61.5 20.7
-5.4717 49.6002 6.1 10.3 27.6 6.9 575 61.5 20.8
-5.4516 49.6002 6.1 10.3 27.6 6.9 575 61.4 20.9
-5.4316 49.6002 6.1 10.3 27.5 6.8 575 61.3 20.7
-5.4116 49.6002 6.1 10.3 27.5 6.8 575 61.2 20.5
-5.3915 49.6002 6.1 10.3 27.5 6.8 575 61.2 20.4
-5.3715 49.6002 6.1 10.3 27.4 6.8 570 61.3 20.2
-5.3515 49.6002 6.1 10.3 27.4 6.8 550 61.3 20
-5.3315 49.6002 6.1 10.3 27.3 6.7 550 61.4 19.8
-5.3114 49.6002 6.1 10.3 27.3 6.7 550 61.4 19.6
-5.2914 49.6002 6.1 10.3 27.3 6.7 550 61.4 19.5
-5.2714 49.6002 6.1 10.3 27.2 6.7 550 61.4 19.4
-5.2513 49.6002 6.1 10.3 27.2 6.7 550 61.5 19.2
-5.2313 49.6002 6.1 10.3 27.2 6.6 550 61.5 19.1
-5.2113 49.6002 6.1 10.3 27.1 6.6 550 61.6 19.1
-5.1912 49.6002 6.1 10.3 27 6.6 550 61.8 19.3
-5.1712 49.6002 6.1 10.3 26.9 6.5 550 61.9 19.6
-5.1512 49.6002 6.1 10.3 26.9 6.5 550 62.2 19.7
-5.1311 49.6002 6.1 10.3 26.8 6.5 550 62.6 19.2
-5.1111 49.6002 6.1 10.3 26.7 6.4 550 62.8 18.6
-5.0911 49.6002 6.1 10.3 26.7 6.4 532 62.9 18.6
-5.071 49.6002 6.1 10.3 26.6 6.3 525 63 18.5
-5.051 49.6002 6.1 10.3 26.5 6.3 525 63.1 18.5
-5.031 49.6002 6.2 10.3 26.5 6.3 525 63.3 18.3
-5.011 49.6002 6.2 10.3 26.4 6.2 525 63.3 18.3
-4.9909 49.6002 6.2 10.3 26.3 6.2 525 63.7 18.2
-4.9709 49.6002 6.2 10.3 26.3 6.2 525 64.2 18.2
-4.9509 49.6002 6.2 10.3 26.2 6.1 525 64.6 18.2
-4.9308 49.6002 6.2 10.3 26.1 6.1 525 64.8 18.2
-4.9108 49.6002 6.2 10.3 26 6 525 64.9 18.4
-4.8908 49.6002 6.2 10.3 25.9 6 525 65.1 18.7
-4.8707 49.6002 6.2 10.3 25.8 5.9 525 65.1 18.5
-4.8507 49.6002 6.2 10.3 25.7 5.9 525 65.2 17.9
-4.8307 49.6002 6.2 10.3 25.6 5.8 525 65.2 17.4
-4.8106 49.6002 6.2 10.3 25.5 5.8 525 65.3 17.2
-4.7906 49.6002 6.2 10.3 25.5 5.7 525 65.4 17.1
-4.7706 49.6002 6.2 10.3 25.4 5.7 525 65.4 17
-4.7505 49.6002 6.2 10.3 25.3 5.6 525 65.5 16.9
-4.7305 49.6002 6.2 10.3 25.2 5.6 525 65.6 16.8
-4.7105 49.6002 6.2 10.3 25.1 5.6 525 65.7 16.8
-4.6905 49.6002 6.2 10.3 25 5.5 525 65.8 16.8
-4.6704 49.6002 6.2 10.3 25 5.5 525 65.9 16.8
-4.6504 49.6002 6.2 10.3 24.8 5.5 525 66 16.9
-4.6304 49.6002 6.2 10.3 24.7 5.5 525 66 17
-4.6103 49.6002 6.2 10.3 24.7 5.5 525 66.1 17.1
-4.5903 49.6002 6.2 10.3 24.6 5.4 525 66.2 17.1
-4.5703 49.6002 6.2 10.3 24.5 5.4 525 66.3 17.2
-4.5502 49.6002 6.2 10.3 24.4 5.4 525 66.3 17.2
-4.5302 49.6002 6.2 10.3 24.3 5.4 506 66.4 17.4
-4.5102 49.6002 6.2 10.3 24.3 5.4 500 66.4 17.4
-4.4901 49.6002 6.2 10.3 24.2 5.4 500 66.4 17.5
-4.4701 49.6002 6.2 10.3 24.1 5.4 500 66 17.6
-4.4501 49.6002 6.2 10.3 24 5.4 500 65.8 17.7
-4.43 49.6002 6.2 10.3 24 5.4 500 65.7 17.8
-4.41 49.6002 6.2 10.3 23.9 5.4 500 65.8 17.9
-4.39 49.6002 6.2 10.3 23.9 5.4 500 65.8 18.1
-4.37 49.6002 6.2 10.3 23.9 5.4 500 65.9 18.5
-4.3499 49.6002 6.2 10.3 23.8 5.4 500 66 18.8
-4.3299 49.6002 6.2 10.3 23.8 5.4 500 66 19.1
-4.3099 49.6002 6.2 10.3 23.7 5.4 500 66.1 19.2
-4.2898 49.6002 6.2 10.2 23.7 5.4 500 66.1 19.3
-4.2698 49.6002 6.2 10.2 23.6 5.5 489 66.2 19.5
-4.2498 49.6002 6.3 10.2 23.6 5.5 450 66.3 19.8
-4.2297 49.6002 6.3 10.2 23.5 5.5 450 66.3 20.1
-4.2097 49.6002 6.3 10.2 23.5 5.5 450 66.3 20.3
-4.1897 49.6002 6.3 10.2 23.5 5.5 450 66.4 20.6
-4.1696 49.6002 6.3 10.2 23.5 5.5 450 66.4 21
-4.1496 49.6002 6.3 10.2 23.4 5.5 450 66.8 21.3
-4.1296 49.6002 6.3 10.2 23.3 5.6 450 67.2 21.6
-4.1095 49.6002 6.3 10.2 23.3 5.6 450 67.3 21.9
-4.0895 49.6002 6.3 10.1 23.3 5.5 450 67.4 22.2
-4.0695 49.6002 6.3 10.1 23.3 5.5 450 67.6 22.5
-4.0495 49.6002 6.3 10.1 23.4 5.5 450 67.8 22.7
-4.0294 49.6002 6.3 10 23.4 5.5 450 67.8 22.6
-4.0094 49.6002 6.3 10 23.4 5.5 450 67.8 22.7
-3.9894 49.6002 6.3 10 23.4 5.5 376 67.8 22.9
-3.9693 49.6002 6.3 10 23.4 5.5 350 67.8 22.9
-3.9493 49.6002 6.3 9.9 23.5 5.5 350 67.8 22.9
-3.9293 49.6002 6.4 9.9 23.5 5.5 350 67.8 22.7
-3.9092 49.6002 6.4 9.9 23.5 5.5 350 67.8 22.6
-3.8892 49.6002 6.4 9.8 23.5 5.6 350 67.7 22.5
-3.8692 49.6002 6.4 9.8 23.5 5.6 350 67.7 22.5
-3.8491 49.6002 6.4 9.8 23.5 5.6 350 67.7 22.4
-3.8291 49.6002 6.4 9.8 23.5 5.6 350 67.7 22.4
-3.8091 49.6002 6.4 9.8 23.4 5.6 350 67.7 22.4
-3.789 49.6002 6.4 9.8 23.4 5.6 350 67.7 22.5
-3.769 49.6002 6.4 9.7 23.4 5.6 350 67.7 22.5
-3.749 49.6002 6.4 9.7 23.4 5.6 350 67.7 22.6
-3.729 49.6002 6.4 9.7 23.4 5.6 350 67.7 22.6
-3.7089 49.6002 6.4 9.7 23.4 5.6 330 67.7 22.7
-3.6889 49.6002 6.4 9.6 23.4 5.7 275 67.7 22.7
-3.6689 49.6002 6.5 9.6 23.3 5.7 275 67.7 22.8
-3.6488 49.6002 6.5 9.6 23.3 5.6 275 67.7 22.8
-3.6288 49.6002 6.5 9.6 23.3 5.6 275 67.7 22.8
-3.6088 49.6002 6.5 9.6 23.2 5.6 275 67.8 22.9
-3.5887 49.6002 6.5 9.7 23.1 5.6 275 67.9 22.8
-3.5687 49.6002 6.5 9.7 23 5.5 275 68 22.7
-3.5487 49.6002 6.5 9.7 22.9 5.5 275 68 22.7
-3.5286 49.6002 6.5 9.7 22.9 5.5 275 67.9 22.7
-3.5086 49.6002 6.5 9.7 22.8 5.5 275 67.9 22.6
-3.4886 49.6002 6.5 9.7 22.7 5.5 275 68.1 22.4
-3.4685 49.6002 6.5 9.7 22.6 5.4 275 68.8 22.4
-3.4485 49.6002 6.5 9.7 22.6 5.4 275 69.5 22.3
-3.4285 49.6002 6.5 9.7 22.6 5.4 275 69.5 22.2
-3.4085 49.6002 6.5 9.7 22.5 5.4 275 69.5 22.2
-3.3884 49.6002 6.5 9.7 22.4 5.4 275 69.6 22.2
-3.3684 49.6002 6.5 9.7 22.4 5.4 275 69.6 22.2
-3.3484 49.6002 6.5 9.7 22.3 5.3 275 69.5 22.3
-3.3283 49.6002 6.5 9.7 22.3 5.3 275 69.4 22.3
-3.3083 49.6002 6.5 9.6 22.3 5.3 275 69.2 22.3
-3.2883 49.6002 6.5 9.6 22.2 5.2 275 69 22.3
-3.2682 49.6002 6.5 9.6 22.1 5.2 275 68.7 22.2
-3.2482 49.6002 6.5 9.7 22 5.1 275 68.1 22.2
-3.2282 49.6002 6.5 9.7 21.8 5.1 275 67.9 22.2
-3.2081 49.6002 6.5 9.7 21.7 5.1 275 70.3 22.8
-3.1881 49.6002 6.5 9.7 21.6 5 275 74.1 23.6
-3.1681 49.6002 6.5 9.8 21.4 5 295 74.5 23.8
-3.148 49.6002 6.5 9.8 21.3 4.9 350 73.5 23.7
-3.128 49.6002 6.5 9.8 21.1 4.9 350 73.8 24
-3.108 49.6002 6.5 9.8 21.1 4.9 350 76.1 24.8
-3.0879 49.6002 6.5 9.8 21.1 4.9 350 76 25
-3.0679 49.6002 6.5 9.8 21.2 5 350 75.7 25.4
-3.0479 49.6002 6.5 9.7 21.2 5 350 75.3 25.6
-3.0279 49.6002 6.5 9.7 21.2 5.1 350 75.3 26
-3.0078 49.6002 6.5 9.7 21.3 5.1 350 75.1 26.2
-2.9878 49.6002 6.5 9.7 21.3 5.1 350 75.1 26.6
-2.9678 49.6002 6.5 9.7 21.3 5.2 350 75.1 26.9
-2.9477 49.6002 6.5 9.6 21.3 5.3 350 75.1 27
-2.9277 49.6002 6.5 9.6 21.3 5.3 350 75.1 27.4
-2.9077 49.6002 6.5 9.6 21.3 5.3 350 75.1 27.7
-2.8876 49.6002 6.5 9.6 21.3 5.4 350 75.1 28
-2.8676 49.6002 6.5 9.6 21.4 5.5 309 75.2 28.5
-2.8476 49.6002 6.5 9.6 21.3 5.5 300 75.2 28.9
-2.8275 49.6002 6.5 9.6 21.3 5.4 300 75.3 29.5
-2.8075 49.6002 6.5 9.6 21.2 5.4 300 75.4 30.1
-2.7875 49.6002 6.5 9.6 21.2 5.4 300 75.5 30.6
-2.7674 49.6002 6.5 9.6 21.1 5.4 300 75.8 31.1
-2.7474 49.6002 6.5 9.6 21.1 5.4 300 76 31.5
-2.7274 49.6002 6.5 9.6 21 5.3 300 76.3 31.8
-2.7074 49.6002 6.5 9.5 21 5.3 300 76.7 32.1
-2.6873 49.6002 6.5 9.5 21.1 5.3 300 77.1 32.2
-2.6673 49.6002 6.5 9.5 21.1 5.3 300 77.5 32.4
-2.6473 49.6002 6.5 9.5 21.1 5.3 300 77.9 32
-2.6272 49.6002 6.5 9.5 21.1 5.3 300 78.3 31.5
-2.6072 49.6002 6.5 9.5 21.1 5.3 300 78.3 30.9
-2.5872 49.6002 6.5 9.5 21.1 5.3 300 78.3 30.6
-2.5671 49.6002 6.5 9.5 21.1 5.3 300 80 30.9
-2.5471 49.6002 6.5 9.5 21.1 5.3 300 81 31.1
-2.5271 49.6002 6.5 9.5 21.1 5.3 300 81.9 31.3
-2.507 49.6002 6.5 9.5 21.1 5.3 300 82.5 31.3
-2.487 49.6002 6.5 9.5 21.1 5.3 300 83.1 31.4
-2.467 49.6002 6.5 9.5 21.1 5.4 300 83.4 31.5
-2.4469 49.6002 6.5 9.5 21.2 5.4 300 84 31.7
-2.4269 49.6002 6.5 9.5 21.2 5.4 300 84.7 32.1
-2.4069 49.6002 6.5 9.5 21.2 5.4 300 82.3 31.4
-2.3869 49.6002 6.5 9.5 21.3 5.5 300 78.6 30.2
-2.3668 49.6002 6.5 9.4 21.3 5.5 300 74.8 28.9
-2.3468 49.6002 6.5 9.4 21.3 5.5 300 75.8 29.3
-2.3268 49.6002 6.5 9.4 21.3 5.5 300 83.9 32.3
-2.3067 49.6002 6.5 9.4 21.3 5.5 295 84.6 32.9
-2.2867 49.6002 6.5 9.4 21.3 5.5 298 84.3 33
-2.2667 49.6002 6.5 9.4 21.3 5.5 300 80.2 31.8
-2.2466 49.6002 6.5 9.4 21.3 5.5 300 71 28.5
-2.2266 49.6002 6.5 9.4 21.3 5.5 300 61.9 25.3
-2.2066 49.6002 6.5 9.4 21.3 5.5 300 59.3 24.6
-2.1865 49.6002 6.5 9.4 21.2 5.6 300 60.3 25.1
-2.1665 49.6002 6.5 9.4 21.2 5.5 300 60.8 25.5
-2.1465 49.6002 6.5 9.4 21.2 5.5 300 62.1 26.1
-2.1264 49.6002 6.5 9.4 21.1 5.5 300 72.4 30.1
-2.1064 49.6002 6.5 9.4 21.1 5.4 300 83.2 34.3
-2.0864 49.6002 6.5 9.4 21 5.4 300 80.9 33.4
-2.0664 49.6002 6.5 9.4 21 5.4 300 72.3 30.3
-2.0463 49.6002 6.5 9.3 21 5.4 300 66.3 28
-2.0263 49.6002 6.5 9.3 21 5.5 300 66.3 28.2
-2.0063 49.6002 6.5 9.3 21 5.5 300 67.4 28.9
-1.9862 49.6002 6.5 9.3 21 5.5 300 67.8 29.1
-1.9662 49.6002 6.5 9.3 21 5.5 300 67.8 29.1
-1.9462 49.6002 6.5 9.3 21 5.5 300 67.8 29
-1.9261 49.6002 6.5 9.3 21 5.6 300 68.3 29.3
-1.9061 49.6002 6.5 9.2 21 5.6 300 67.4 29.2
-1.8861 49.6002 6.5 9.2 21 5.6 300 66.5 29.2
-1.866 49.6002 6.5 9.2 21 5.6 300 69.2 30.7
-1.846 49.6002 6.5 9.2 21 5.7 300 72.7 32.6
-1.826 49.6002 6.5 9.2 21 5.7 300 75.2 33.8
-1.8059 49.6002 6.5 9.2 21 5.7 300 74.7 33.4
-1.7859 49.6002 6.5 9.2 21 5.7 300 74.2 33
-1.7659 49.6002 6.5 9.2 21 5.7 322 73.9 32.8
-1.7459 49.6002 6.5 9.2 20.9 5.7 325 73.7 32.9
-1.7258 49.6002 6.5 9.2 20.9 5.7 325 73.6 32.9
-1.7058 49.6002 6.5 9.2 20.9 5.7 325 73.5 32.8
-1.6858 49.6002 6.5 9.2 20.9 5.6 325 73.5 32.7
-1.6657 49.6002 6.5 9.2 20.9 5.6 325 73.5 32.6
-1.6457 49.6002 6.5 9.2 20.9 5.6 325 73.5 32.5
-1.6257 49.6002 6.5 9.2 20.9 5.6 325 73.6 32.4
-1.6056 49.6002 6.5 9.2 20.9 5.6 325 73.6 32.4
-1.5856 49.6002 6.5 9.2 20.9 5.7 325 73.7 32.7
-1.5656 49.6002 6.5 9.2 20.9 5.6 325 73.5 32.9
-1.5455 49.6002 6.5 9.2 20.9 5.6 325 73.4 32.7
-1.5255 49.6002 6.4 9.3 20.9 5.6 325 73.4 32.1
-1.5055 49.6002 6.4 9.3 20.9 5.6 325 73.4 31.8
-1.4854 49.6002 6.5 9.3 20.9 5.6 345 73.3 31.6
-1.4654 49.6002 6.4 9.3 20.9 5.6 375 73.3 31.4
-1.4454 49.6002 6.4 9.3 20.9 5.6 375 73.2 31.2
-1.4254 49.6002 6.4 9.4 20.9 5.5 375 73.1 31.1
-1.4053 49.6002 6.4 9.4 20.9 5.5 375 73.1 30.8
-1.3853 49.6002 6.4 9.4 20.9 5.5 375 73.1 30.6
-1.3653 49.6002 6.4 9.4 20.9 5.5 375 73.1 30.5
-1.3452 49.6002 6.4 9.4 21 5.5 375 73.1 30.3
-1.3252 49.6002 6.4 9.4 21 5.5 375 73.2 30.2
-1.3052 49.6002 6.4 9.5 21.1 5.5 375 73.3 30.2
-1.2851 49.6002 6.4 9.5 21.2 5.5 375 73.4 29.9
-1.2651 49.6002 6.4 9.5 21.3 5.6 375 73.6 29.6
-1.2451 49.6002 6.4 9.5 21.5 5.6 375 74.1 29.3
-1.225 49.6002 6.4 9.5 21.6 5.6 375 74.5 28.9
-1.205 49.6002 6.4 9.5 21.7 5.6 443 71.8 27.8
-1.185 49.6002 6.4 9.6 21.8 5.6 450 67.7 26.4
-1.1649 49.6002 6.4 9.6 21.9 5.6 450 64.7 25.3
-1.1449 49.6002 6.4 9.6 22 5.7 450 64.7 25
-1.1249 49.6002 6.4 9.6 22.2 5.7 450 65.2 24.8
-1.1049 49.6002 6.4 9.6 22.3 5.7 450 65.3 24.6
-1.0848 49.6002 6.4 9.6 22.4 5.7 450 65.3 24.3
-1.0648 49.6002 6.4 9.7 22.5 5.7 450 65.2 24
-1.0448 49.6002 6.4 9.7 22.6 5.8 450 65 23.8
-1.0247 49.6002 6.4 9.7 22.8 5.8 450 64.8 23.7
-1.0047 49.6002 6.4 9.6 22.9 5.8 450 64.2 23.5
-0.9847 49.6002 6.4 9.6 23 5.8 450 63.8 23.3
-0.9646 49.6002 6.4 9.6 23.2 5.9 450 63.7 23
-0.9446 49.6002 6.4 9.6 23.3 5.9 460 64.4 22.9
-0.9246 49.6002 6.4 9.6 23.5 5.9 475 64.4 22.7
-0.9045 49.6002 6.4 9.6 23.6 6 475 64.4 22.5
-0.8845 49.6002 6.4 9.6 23.8 6 475 64.3 22.3
-0.8645 49.6002 6.4 9.6 23.9 6.1 475 64.1 22.1
-0.8444 49.6002 6.4 9.6 24.1 6.1 475 63.7 21.8
-0.8244 49.6002 6.4 9.6 24.2 6.1 475 63.1 21.6
-0.8044 49.6002 6.4 9.6 24.3 6.1 475 62.1 21.2
-0.7844 49.6002 6.4 9.6 24.4 6.2 475 60.7 20.8
-0.7643 49.6002 6.4 9.7 24.5 6.2 475 60.1 20.7
-0.7443 49.6002 6.4 9.7 24.6 6.2 475 67.3 23.7
-0.7243 49.6002 6.4 9.7 24.6 6.2 475 76.3 27.3
-0.7042 49.6002 6.4 9.7 24.7 6.2 475 80.6 28.7
-0.6842 49.6002 6.4 9.7 24.8 6.3 475 80.5 27.8
-0.6642 49.6002 6.4 9.7 24.9 6.3 487 80.4 27.1
-0.6441 49.6002 6.4 9.7 25 6.3 523 81.7 27.4
-0.6241 49.6002 6.4 9.8 25 6.3 525 83.5 28.1
-0.6041 49.6002 6.4 9.8 25.1 6.4 525 83 28
-0.584 49.6002 6.4 9.8 25.2 6.4 525 71.4 24.8
-0.564 49.6002 6.4 9.8 25.3 6.4 525 60.6 21.7
-0.544 49.6002 6.4 9.8 25.4 6.4 525 58.3 20.8
-0.5239 49.6002 6.4 9.8 25.5 6.5 525 60.6 20.9
-0.5039 49.6002 6.4 9.8 25.5 6.5 525 62.3 21
-0.4839 49.6002 6.4 9.8 25.6 6.5 525 63.2 21.4
-0.4638 49.6002 6.4 9.8 25.6 6.5 525 63.8 21.8
-0.4438 49.6002 6.4 9.8 25.7 6.5 525 64.2 21.9
-0.4238 49.6002 6.4 9.8 25.8 6.5 525 64.4 21.4
-0.4038 49.6002 6.4 9.8 25.8 6.5 525 64.5 20.8
-0.3837 49.6002 6.4 9.8 25.9 6.6 536 64.6 20.5
-0.3637 49.6002 6.4 9.8 25.9 6.6 550 64.7 20.3
-0.3437 49.6002 6.4 9.8 26 6.6 550 64.8 20.1
-0.3236 49.6002 6.4 9.8 26.1 6.6 550 64.8 20
-0.3036 49.6002 6.4 9.8 26.1 6.6 550 64.9 19.8
-0.2836 49.6002 6.4 9.8 26.2 6.6 550 64.9 19.7
-0.2635 49.6002 6.4 9.8 26.2 6.6 550 64.9 19.6
-0.2435 49.6002 6.4 9.8 26.3 6.6 550 64.9 19.5
-0.2235 49.6002 6.4 9.8 26.3 6.6 550 64.9 19.4
-0.2034 49.6002 6.4 9.8 26.3 6.6 550 64.9 19.4
-0.1834 49.6002 6.4 9.8 26.3 6.6 550 64.9 19.5
-0.1634 49.6002 6.4 9.8 26.4 6.6 550 64.9 19.5
-0.1433 49.6002 6.4 9.8 26.4 6.6 550 64.9 19.4
-0.1233 49.6002 6.4 9.8 26.4 6.6 550 64.8 19.2
-0.1033 49.6002 6.4 9.8 26.4 6.6 574 64.8 19
-0.0833 49.6002 6.4 9.8 26.4 6.6 575 64.8 19
-0.0632 49.6002 6.4 9.8 26.5 6.6 575 64.8 18.9
-0.0432 49.6002 6.4 9.8 26.5 6.6 575 64.7 19
-0.0232 49.6002 6.4 9.8 26.6 6.7 575 64.7 19
-0.0031 49.6002 6.4 9.8 26.6 6.7 575 64.7 19
0.0169 49.6002 6.4 9.8 26.7 6.7 575 64.7 19.2
0.0369 49.6002 6.4 9.8 26.7 6.8 575 64.6 19.3
0.057 49.6002 6.4 9.8 26.8 6.8 575 64.6 19.5
0.077 49.6002 6.4 9.9 26.8 6.8 575 64.6 19.7
0.097 49.6002 6.4 10 26.8 6.8 575 64.6 20
0.1171 49.6002 6.5 10 26.9 6.9 575 64.5 20.4
0.1371 49.6002 6.5 10.1 26.9 6.9 575 64.5 20.5
0.1571 49.6002 6.5 10.1 27 6.9 575 64.4 20.2
0.1772 49.6002 6.5 10.2 27 6.9 575 64.4 19.7
0.1972 49.6002 6.5 10.3 27.1 7 575 64.4 19.8
0.2172 49.6002 6.5 10.2 27.1 7 575 64.3 20
0.2372 49.6002 6.5 10.2 27.1 7 575 64.3 20
0.2573 49.6002 6.5 10.2 27.2 7 575 64.2 20.1
0.2773 49.6002 6.5 10.2 27.3 7.1 575 64.2 20.2
0.2973 49.6002 6.5 10.2 27.3 7.1 575 64.2 20.2
0.3174 49.6002 6.5 10.1 27.3 7.1 575 64.2 20.3
0.3374 49.6002 6.5 10.1 27.3 7.1 575 64.1 20.3
0.3574 49.6002 6.5 10 27.4 7.1 575 64.1 20.4
0.3775 49.6002 6.5 9.9 27.4 7.1 575 64.1 20.4
0.3975 49.6002 6.5 9.9 27.5 7.1 575 64 20.4
0.4175 49.6002 6.4 9.8 27.5 7.1 575 64 20.4
0.4376 49.6002 6.4 9.7 27.5 7.1 575 64 20.4
0.4576 49.6002 6.4 9.7 27.6 7.2 600 64 20.3
0.4776 49.6002 6.4 9.7 27.6 7.2 600 63.9 20.3
0.4977 49.6002 6.4 9.7 27.6 7.2 583 63.9 20.4
0.5177 49.6002 6.4 9.7 27.7 7.2 583 63.9 20.4
0.5377 49.6002 6.4 9.7 27.7 7.3 583 63.9 20.5
0.5577 49.6002 6.4 9.7 27.7 7.3 575 63.9 20.6
0.5778 49.6002 6.4 9.7 27.8 7.3 575 63.8 20.8
0.5978 49.6002 6.4 9.6 27.8 7.3 575 63.8 20.9
0.6178 49.6002 6.4 9.6 27.8 7.4 575 63.8 21.2
0.6379 49.6002 6.4 9.6 27.9 7.4 575 63.8 21.4
0.6579 49.6002 6.4 9.6 27.9 7.4 575 63.7 21.6
0.6779 49.6002 6.4 9.6 28 7.4 575 63.7 21.8
0.698 49.6002 6.4 9.6 28 7.5 575 63.7 22
0.718 49.6002 6.4 9.6 28 7.5 575 63.7 22.1
0.738 49.6002 6.4 9.6 28.1 7.5 575 63.7 22.3
0.7581 49.6002 6.4 9.6 28.1 7.5 575 63.7 22.4
0.7781 49.6002 6.4 9.6 28.2 7.6 575 63.7 22.5
0.7981 49.6002 6.4 9.6 28.2 7.6 575 63.6 22.5
0.8182 49.6002 6.4 9.6 28.2 7.6 575 63.6 22.7
0.8382 49.6002 6.4 9.6 28.2 7.7 575 63.6 23
0.8582 49.6002 6.4 9.6 28.3 7.7 575 63.6 22.9
0.8782 49.6002 6.4 9.6 28.3 7.7 575 63.6 22.7
0.8983 49.6002 6.4 9.6 28.3 7.8 575 63.6 22.5
0.9183 49.6002 6.4 9.6 28.3 7.8 575 63.6 22.3
0.9383 49.6002 6.4 9.6 28.3 7.8 575 63.6 22.1
0.9584 49.6002 6.4 9.6 28.3 7.7 575 63.6 21.9
0.9784 49.6002 6.4 9.6 28.2 7.7 575 63.6 21.6
0.9984 49.6002 6.4 9.6 28.2 7.6 575 63.6 21.2
1.0185 49.6002 6.4 9.6 28.2 7.6 600 63.6 20.8
1.0385 49.6002 6.4 9.6 28.1 7.5 600 63.5 20.7
1.0585 49.6002 6.4 9.6 28.1 7.5 600 63.5 20.5
1.0786 49.6002 6.4 9.6 28 7.4 600 63.5 20.4
1.0986 49.6002 6.4 9.6 28 7.4 600 63.5 20.3
1.1186 49.6002 6.4 9.6 27.9 7.3 600 63.5 20.2
1.1387 49.6002 6.4 9.6 27.9 7.3 600 63.5 20.3
1.1587 49.6002 6.4 9.6 27.9 7.3 600 63.5 20.4
1.1787 49.6002 6.4 9.6 28 7.3 600 63.5 20.5
1.1987 49.6002 6.4 9.6 28 7.3 600 63.5 20.7
1.2188 49.6002 6.5 9.6 28 7.3 600 63.4 20.7
1.2388 49.6002 6.5 9.6 28 7.3 600 63.4 20.6
1.2588 49.6002 6.5 9.6 28 7.3 600 63.4 20.4
1.2789 49.6002 6.5 9.6 28.1 7.3 600 63.4 20.3
1.2989 49.6002 6.5 9.6 28.1 7.3 600 63.4 20.3
1.3189 49.6002 6.5 9.6 28.1 7.3 600 63.4 20.3
1.339 49.6002 6.5 9.6 28.1 7.3 600 63.4 20.2
1.359 49.6002 6.5 9.6 28.1 7.3 600 63.4 20.2
1.379 49.6002 6.5 9.5 28.1 7.3 600 63.4 20.2
1.3991 49.6002 6.5 9.5 28.1 7.3 600 63.4 20.2
1.4191 49.6002 6.5 9.5 28.1 7.3 600 63.4 20.3
1.4391 49.6002 6.5 9.5 28.1 7.3 600 63.4 20.3
1.4592 49.6002 6.5 9.5 28.2 7.3 600 63.4 20.3
1.4792 49.6002 6.5 9.5 28.2 7.3 600 63.3 20.4
1.4992 49.6002 6.5 9.5 28.2 7.3 600 63.3 20.6
1.5192 49.6002 6.5 9.5 28.2 7.3 600 63.3 20.6
1.5393 49.6002 6.5 9.5 28.3 7.4 600 63.3 20.5
1.5593 49.6002 6.5 9.5 28.3 7.4 600 63.3 20.4
1.5793 49.6002 6.5 9.5 28.3 7.4 600 63.3 20.3
1.5994 49.6002 6.5 9.5 28.3 7.4 600 63.3 20.3
1.6194 49.6002 6.5 9.5 28.4 7.4 600 63.3 20.5
1.6394 49.6002 6.5 9.5 28.4 7.4 600 63.3 20.6
1.6595 49.6002 6.5 9.5 28.4 7.4 600 63.3 20.5
1.6795 49.6002 6.5 9.5 28.4 7.5 600 63.2 20.5
1.6995 49.6002 6.5 9.4 28.5 7.5 600 63.2 20.7
1.7196 49.6002 6.5 9.4 28.5 7.6 600 63.2 21
1.7396 49.6002 6.5 9.4 28.6 7.6 600 63.1 21.3
1.7596 49.6002 6.5 9.4 28.6 7.7 600 63.1 21.8
1.7797 49.6002 6.5 9.4 28.7 7.8 600 63.1 22.3
1.7997 49.6002 6.5 9.4 28.7 7.9 600 63.1 23
1.8197 49.6002 6.5 9.3 28.8 8 600 63 24.3
1.8397 49.6002 6.5 9.3 28.9 8.1 558 63 25.3
1.8598 49.6002 6.5 9.3 29 8.1 525 62.9 25.8
1.8798 49.6002 6.5 9.3 29 8.2 525 62.9 26
1.8998 49.6002 6.5 9.3 29.1 8.3 525 62.9 26.6
1.9199 49.6002 6.5 9.3 29.1 8.3 525 62.8 27.2
1.9399 49.6002 6.6 9.3 29.2 8.4 525 62.8 27.8
1.9599 49.6002 6.6 9.4 29.2 8.4 525 62.8 28.5
1.98 49.6002 6.6 9.4 29.3 8.5 525 62.7 29.6
2 49.6002 6.6 9.4 29.4 8.6 525 62.7 30.9
-10.8 49.6203 6.3 10.1 30.6 7.8 550 58.9 20.1
-10.78 49.6203 6.3 10.1 30.6 7.8 550 59 20.6
-10.7599 49.6203 6.3 10.2 30.6 7.8 550 59.1 21.4
-10.7399 49.6203 6.3 10.2 30.5 7.8 550 59.1 22.3
-10.7199 49.6203 6.3 10.2 30.6 7.8 550 59 22.6
-10.6998 49.6203 6.3 10.1 30.7 7.9 550 59 22.6
-10.6798 49.6203 6.3 10.1 30.8 8 550 59 22.9
-10.6598 49.6203 6.3 10.1 30.9 8.1 550 58.9 23.7
-10.6397 49.6203 6.3 10.1 31 8.2 550 58.9 24.9
-10.6197 49.6203 6.3 10.1 31.2 8.3 550 58.8 25.9
-10.5997 49.6203 6.3 10.1 31.3 8.4 550 58.5 27
-10.5797 49.6203 6.3 10.1 31.4 8.6 550 58.3 28
-10.5596 49.6203 6.3 10.1 31.5 8.7 550 58.2 28.6
-10.5396 49.6203 6.3 10.1 31.7 8.8 550 58.1 28.8
-10.5196 49.6203 6.3 10.1 31.8 8.9 550 58.1 29
-10.4995 49.6203 6.3 10.1 31.9 9 550 58.1 29.8
-10.4795 49.6203 6.3 10.1 32 9.1 550 58.3 30.7
-10.4595 49.6203 6.3 10.1 32 9.1 550 58.5 31.6
-10.4394 49.6203 6.3 10.1 32.1 9.2 550 58.6 32.5
-10.4194 49.6203 6.3 10.1 32.1 9.3 550 58.6 33.3
-10.3994 49.6203 6.3 10.1 32.2 9.3 550 58.6 33.8
-10.3793 49.6203 6.3 10.1 32.2 9.4 550 58.6 34
-10.3593 49.6203 6.3 10.1 32.3 9.4 550 58.6 34.3
-10.3393 49.6203 6.3 10.1 32.3 9.5 574 58.5 34.8
-10.3192 49.6203 6.3 10.1 32.4 9.6 575 58.5 35.6
-10.2992 49.6203 6.3 10.1 32.4 9.6 575 58.5 36.5
-10.2792 49.6203 6.3 10.2 32.5 9.7 575 58.5 37.6
-10.2592 49.6203 6.3 10.2 32.5 9.7 575 58.5 38.7
-10.2391 49.6203 6.3 10.2 32.6 9.8 575 58.4 39.5
-10.2191 49.6203 6.3 10.2 32.6 9.8 575 58.4 40.1
-10.1991 49.6203 6.3 10.2 32.7 9.9 575 58.4 40.4
-10.179 49.6203 6.3 10.2 32.7 9.9 575 58.4 40.8
-10.159 49.6203 6.3 10.2 32.7 9.9 575 58.4 40.1
-10.139 49.6203 6.3 10.2 32.7 9.8 575 58.3 39
-10.1189 49.6203 6.2 10.2 32.7 9.8 575 58.4 37.6
-10.0989 49.6203 6.2 10.2 32.8 9.8 575 58.7 36.7
-10.0789 49.6203 6.2 10.2 32.8 9.8 586 59.1 35.9
-10.0588 49.6203 6.2 10.2 32.8 9.8 600 59.4 35.3
-10.0388 49.6203 6.2 10.2 32.8 9.8 600 59.3 34.7
-10.0188 49.6203 6.2 10.2 32.8 9.7 600 59.3 34.1
-9.9987 49.6203 6.2 10.2 32.8 9.7 600 59.2 33.8
-9.9787 49.6203 6.2 10.3 32.8 9.7 600 59.2 33.8
-9.9587 49.6203 6.2 10.3 32.9 9.7 600 59.1 33.9
-9.9387 49.6203 6.2 10.3 32.9 9.7 600 59.6 33.8
-9.9186 49.6203 6.2 10.3 32.9 9.7 600 60.2 33.5
-9.8986 49.6203 6.2 10.3 32.8 9.6 600 60.6 33
-9.8786 49.6203 6.2 10.3 32.8 9.6 600 60.7 32.3
-9.8585 49.6203 6.2 10.3 32.8 9.6 600 60.6 31.9
-9.8385 49.6203 6.2 10.3 32.8 9.5 600 60.6 31.5
-9.8185 49.6203 6.2 10.3 32.8 9.5 600 60.5 31
-9.7984 49.6203 6.2 10.3 32.8 9.5 600 60.4 30.6
-9.7784 49.6203 6.2 10.3 32.8 9.5 625 60.4 30.3
-9.7584 49.6203 6.2 10.3 32.8 9.4 625 60.4 29.8
-9.7383 49.6203 6.2 10.3 32.7 9.4 625 60.4 29.1
-9.7183 49.6203 6.2 10.3 32.7 9.4 625 60.4 28.7
-9.6983 49.6203 6.2 10.3 32.7 9.3 625 60.3 28.5
-9.6782 49.6203 6.2 10.3 32.7 9.3 625 60.3 28.3
-9.6582 49.6203 6.2 10.3 32.7 9.3 625 60.3 28.6
-9.6382 49.6203 6.2 10.3 32.7 9.3 625 60.3 28.9
-9.6182 49.6203 6.2 10.3 32.7 9.3 625 60.3 29.1
-9.5981 49.6203 6.2 10.3 32.7 9.3 625 60.3 29.3
-9.5781 49.6203 6.2 10.3 32.6 9.3 625 60.3 29.4
-9.5581 49.6203 6.2 10.3 32.6 9.4 625 60.3 29.5
-9.538 49.6203 6.2 10.3 32.6 9.4 625 60.3 29.8
-9.518 49.6203 6.2 10.3 32.6 9.4 625 60.3 30.2
-9.498 49.6203 6.2 10.4 32.6 9.4 625 60.3 30.8
-9.4779 49.6203 6.2 10.3 32.6 9.4 625 60.3 31.5
-9.4579 49.6203 6.2 10.3 32.6 9.4 625 60.3 32.2
-9.4379 49.6203 6.2 10.4 32.5 9.5 625 60.3 32.5
-9.4178 49.6203 6.2 10.4 32.5 9.5 625 60.3 32.6
-9.3978 49.6203 6.2 10.4 32.5 9.5 625 60.3 32.7
-9.3778 49.6203 6.2 10.4 32.5 9.5 625 60.3 33.1
-9.3577 49.6203 6.2 10.4 32.5 9.5 625 60.4 33.9
-9.3377 49.6203 6.2 10.4 32.4 9.5 625 60.4 34.7
-9.3177 49.6203 6.2 10.4 32.4 9.5 625 60.4 34.9
-9.2977 49.6203 6.2 10.4 32.4 9.5 625 60.4 35
-9.2776 49.6203 6.2 10.4 32.4 9.5 625 60.4 35.1
-9.2576 49.6203 6.2 10.4 32.3 9.5 625 60.4 35.1
-9.2376 49.6203 6.2 10.4 32.3 9.5 625 60.4 35
-9.2175 49.6203 6.2 10.4 32.3 9.5 625 60.4 35.1
-9.1975 49.6203 6.2 10.4 32.2 9.5 625 60.4 35.5
-9.1775 49.6203 6.2 10.4 32.2 9.5 625 60.4 35.9
-9.1574 49.6203 6.2 10.4 32.2 9.5 625 60.4 36.1
-9.1374 49.6203 6.2 10.4 32.2 9.5 625 60.4 36.2
-9.1174 49.6203 6.2 10.4 32.1 9.5 625 60.4 36.4
-9.0973 49.6203 6.2 10.3 32.1 9.5 625 60.3 36.8
-9.0773 49.6203 6.2 10.3 32.1 9.5 625 60.3 36.9
-9.0573 49.6203 6.2 10.3 32.1 9.5 625 60.3 36.5
-9.0372 49.6203 6.2 10.3 32 9.4 625 60.3 35.5
-9.0172 49.6203 6.2 10.3 31.9 9.4 625 60.2 34.7
-8.9972 49.6203 6.2 10.3 31.9 9.4 625 60.2 34
-8.9772 49.6203 6.2 10.3 31.9 9.4 625 60.1 33.5
-8.9571 49.6203 6.2 10.3 31.8 9.4 625 60.1 33
-8.9371 49.6203 6.2 10.3 31.8 9.3 625 60 32.7
-8.9171 49.6203 6.2 10.3 31.7 9.3 625 59.9 32.4
-8.897 49.6203 6.2 10.3 31.7 9.3 625 59.9 32.2
-8.877 49.6203 6.2 10.3 31.7 9.3 625 59.7 32.1
-8.857 49.6203 6.2 10.3 31.6 9.2 625 59.6 31.9
-8.8369 49.6203 6.1 10.3 31.6 9.2 625 59.4 31.9
-8.8169 49.6203 6.1 10.3 31.6 9.3 625 59.3 32.5
-8.7969 49.6203 6.1 10.3 31.6 9.3 625 59.2 33.2
-8.7768 49.6203 6.1 10.3 31.6 9.4 625 59 34
-8.7568 49.6203 6.1 10.3 31.6 9.5 625 58.7 35.2
-8.7368 49.6203 6.1 10.3 31.6 9.5 625 58.5 36.3
-8.7167 49.6203 6.1 10.3 31.7 9.6 625 59.3 38.5
-8.6967 49.6203 6.1 10.2 31.7 9.6 625 58.9 40.6
-8.6767 49.6203 6.1 10.2 31.7 9.7 600 58.8 42.8
-8.6567 49.6203 6.1 10.2 31.7 9.8 600 59.9 46.3
-8.6366 49.6203 6.1 10.2 31.7 9.8 600 63.3 50.9
-8.6166 49.6203 6.1 10.2 31.8 9.9 600 65.7 55.4
-8.5966 49.6203 6.1 10.2 31.8 10 600 66 59.6
-8.5765 49.6203 6.1 10.2 31.8 10 600 65.7 63.6
-8.5565 49.6203 6.1 10.2 31.8 10.1 600 65.4 66.9
-8.5365 49.6203 6.1 10.2 31.7 10.1 600 65.2 69.2
-8.5164 49.6203 6.1 10.2 31.6 10 600 65.1 71.9
-8.4964 49.6203 6.1 10.2 31.6 10 600 65 72.2
-8.4764 49.6203 6.1 10.2 31.5 9.9 600 64.8 71.1
-8.4563 49.6203 6.1 10.2 31.4 9.9 600 64.9 70.2
-8.4363 49.6203 6.1 10.2 31.4 9.9 600 65.1 68.3
-8.4163 49.6203 6.1 10.2 31.3 9.8 600 65.6 65.6
-8.3962 49.6203 6.1 10.2 31.2 9.8 600 65.9 62.7
-8.3762 49.6203 6.1 10.2 31.2 9.7 600 63.1 59.7
-8.3562 49.6203 6.1 10.2 31.1 9.7 600 60.2 56.6
-8.3362 49.6203 6.1 10.2 31 9.7 600 58.4 54.2
-8.3161 49.6203 6.1 10.2 31 9.6 600 58.5 52.8
-8.2961 49.6203 6.1 10.2 30.9 9.6 600 59 51.8
-8.2761 49.6203 6.1 10.2 31 9.7 600 59.3 50.8
-8.256 49.6203 6.1 10.2 30.9 9.6 600 59.5 50
-8.236 49.6203 6.1 10.2 30.8 9.6 600 59.7 49.1
-8.216 49.6203 6.1 10.2 30.8 9.6 600 59.8 47.8
-8.1959 49.6203 6.1 10.2 30.7 9.5 600 59.9 46.3
-8.1759 49.6203 6.1 10.2 30.7 9.5 600 60 44.9
-8.1559 49.6203 6.1 10.2 30.6 9.4 600 59.5 44
-8.1358 49.6203 6.1 10.2 30.5 9.4 600 58.9 43.4
-8.1158 49.6203 6.1 10.1 30.5 9.4 600 58.5 42.8
-8.0958 49.6203 6.1 10.1 30.4 9.3 600 58.3 42.3
-8.0757 49.6203 6.1 10.1 30.3 9.3 600 58.3 42
-8.0557 49.6203 6.1 10.1 30.3 9.2 600 58.3 41.6
-8.0357 49.6203 6.1 10.1 30.2 9.2 600 58.3 41.2
-8.0156 49.6203 6.1 10.1 30.2 9.1 600 58.2 40.8
-7.9956 49.6203 6.1 10.1 30.1 9.1 600 58.1 40.9
-7.9756 49.6203 6.1 10.1 30.1 9.1 600 58.1 41.2
-7.9556 49.6203 6.1 10.1 30 9.1 600 58 41.6
-7.9355 49.6203 6.1 10.1 30 9.1 600 58.2 41.8
-7.9155 49.6203 6.1 10.2 30 9.1 600 58.7 41.7
-7.8955 49.6203 6.1 10.2 30 9.1 600 58.9 41.7
-7.8754 49.6203 6.1 10.2 29.9 9.1 600 58.6 41.9
-7.8554 49.6203 6.1 10.2 29.9 9.1 614 58 42.2
-7.8354 49.6203 6.1 10.2 29.9 9.1 625 58.3 43
-7.8153 49.6203 6.1 10.2 29.8 9.1 625 61 44.9
-7.7953 49.6203 6.1 10.2 29.8 9.1 625 64.1 46.9
-7.7753 49.6203 6.1 10.2 29.8 9.1 625 65.6 48.2
-7.7552 49.6203 6.1 10.2 29.7 9.1 625 65.1 48.5
-7.7352 49.6203 6.1 10.2 29.7 9.1 625 64.7 48.9
-7.7152 49.6203 6.1 10.2 29.7 9.1 625 64.3 49.7
-7.6951 49.6203 6.1 10.2 29.8 9.2 625 64.1 51
-7.6751 49.6203 6.1 10.2 29.8 9.2 625 63.9 52.2
-7.6551 49.6203 6.1 10.2 29.8 9.3 625 63.7 53.2
-7.6351 49.6203 6.1 10.2 29.8 9.3 625 63.6 54.2
-7.615 49.6203 6.1 10.2 29.8 9.3 625 63.4 55.2
-7.595 49.6203 6.1 10.2 29.8 9.4 624 63.3 57.1
-7.575 49.6203 6.1 10.2 29.9 9.4 600 63.3 58.9
-7.5549 49.6203 6.1 10.2 29.9 9.4 600 63.2 60.9
-7.5349 49.6203 6.1 10.2 29.9 9.5 600 63.1 62.9
-7.5149 49.6203 6.1 10.1 29.9 9.5 600 63.1 64.8
-7.4948 49.6203 6.1 10.1 29.9 9.6 600 63 66.6
-7.4748 49.6203 6.1 10.1 30 9.6 600 63 68.3
-7.4548 49.6203 6.1 10.1 30 9.6 600 62.9 69.9
-7.4347 49.6203 6.1 10.1 30 9.7 600 62.9 70.9
-7.4147 49.6203 6.1 10.1 29.9 9.6 600 62.9 71.4
-7.3947 49.6203 6.1 10.1 29.9 9.6 600 62.9 71.7
-7.3746 49.6203 6.1 10.1 29.8 9.6 600 62.9 70.6
-7.3546 49.6203 6.1 10.1 29.8 9.5 600 62.9 69.1
-7.3346 49.6203 6.1 10.1 29.7 9.5 600 63 67.9
-7.3146 49.6203 6.1 10.1 29.7 9.4 600 63 67.6
-7.2945 49.6203 6.1 10.2 29.6 9.4 600 63 67.4
-7.2745 49.6203 6.1 10.2 29.6 9.4 600 63 66.9
-7.2545 49.6203 6.1 10.2 29.6 9.3 600 63.1 65.9
-7.2344 49.6203 6.1 10.2 29.5 9.3 600 63.2 64.8
-7.2144 49.6203 6 10.2 29.5 9.3 600 63.2 63.3
-7.1944 49.6203 6 10.2 29.4 9.2 600 63.3 61.4
-7.1743 49.6203 6 10.2 29.4 9.2 600 63.3 59.6
-7.1543 49.6203 6 10.2 29.3 9.1 600 63.4 56.8
-7.1343 49.6203 6.1 10.2 29.2 9 600 63.4 53.9
-7.1142 49.6203 6.1 10.2 29.1 8.9 600 63.5 51.2
-7.0942 49.6203 6.1 10.2 29 8.7 600 63.6 48.4
-7.0742 49.6203 6.1 10.3 28.9 8.6 600 63.7 45.4
-7.0541 49.6203 6.1 10.3 28.8 8.5 600 63.7 42.4
-7.0341 49.6203 6.1 10.3 28.7 8.4 605 63.8 39.8
-7.0141 49.6203 6.1 10.3 28.6 8.3 650 63.8 37.3
-6.9941 49.6203 6.1 10.3 28.5 8.2 650 63.9 35.3
-6.974 49.6203 6.1 10.3 28.4 8 650 63.9 33.7
-6.954 49.6203 6.1 10.4 28.3 7.9 650 64 32.3
-6.934 49.6203 6.1 10.4 28.2 7.8 650 64 31.2
-6.9139 49.6203 6.1 10.4 28.1 7.7 650 64.1 30.4
-6.8939 49.6203 6.1 10.4 28 7.5 650 64.1 29.7
-6.8739 49.6203 6.1 10.4 28 7.5 650 64.2 29.5
-6.8538 49.6203 6.1 10.4 28.1 7.6 650 64.2 29.5
-6.8338 49.6203 6.1 10.4 28.2 7.6 650 64.2 29.6
-6.8138 49.6203 6.1 10.4 28.3 7.8 650 64.2 29.9
-6.7937 49.6203 6.1 10.4 28.4 7.8 650 64.2 30.2
-6.7737 49.6203 6.1 10.4 28.5 7.9 650 64.2 30.6
-6.7537 49.6203 6.1 10.3 28.6 7.9 635 64.2 31.2
-6.7336 49.6203 6.1 10.3 28.7 8 625 64.2 32.1
-6.7136 49.6203 6.1 10.3 28.8 8 625 64.2 32.8
-6.6936 49.6203 6.1 10.3 28.9 8.1 625 64.3 33.5
-6.6736 49.6203 6.1 10.3 29 8.2 625 64.3 34.1
-6.6535 49.6203 6.1 10.3 29.1 8.2 625 64.3 34.6
-6.6335 49.6203 6.1 10.3 29.2 8.3 625 64.3 34.8
-6.6135 49.6203 6.1 10.3 29.3 8.3 625 64.3 35
-6.5934 49.6203 6.1 10.3 29.3 8.3 625 64.4 35.1
-6.5734 49.6203 6.1 10.3 29.3 8.2 625 64.4 35.1
-6.5534 49.6203 6.1 10.3 29.3 8.2 625 64.5 34.6
-6.5333 49.6203 6.1 10.3 29.3 8.1 625 64.6 33.5
-6.5133 49.6203 6.1 10.3 29.3 8.1 625 64.7 32.3
-6.4933 49.6203 6.1 10.3 29.3 8 625 64.7 31.2
-6.4732 49.6203 6.1 10.3 29.3 8 625 64.8 30.4
-6.4532 49.6203 6.1 10.3 29.2 7.9 625 65 29.8
-6.4332 49.6203 6.1 10.3 29.2 7.9 625 65.1 29.1
-6.4131 49.6203 6.1 10.3 29.2 7.8 625 65.2 28.5
-6.3931 49.6203 6.1 10.3 29.2 7.8 625 65.4 27.8
-6.3731 49.6203 6.1 10.3 29.2 7.8 625 65.8 27.3
-6.3531 49.6203 6.1 10.3 29.2 7.7 625 66.1 26.8
-6.333 49.6203 6.1 10.3 29.2 7.7 625 66.3 26.3
-6.313 49.6203 6.1 10.3 29.2 7.6 625 66.7 25.8
-6.293 49.6203 6.1 10.3 29.1 7.5 625 67 25.5
-6.2729 49.6203 6.1 10.3 28.9 7.4 625 65.5 24.7
-6.2529 49.6203 6.1 10.3 28.9 7.3 625 62.9 23.3
-6.2329 49.6203 6.1 10.4 28.8 7.2 625 62.1 22.1
-6.2128 49.6203 6.1 10.4 28.7 7.1 625 62.5 21.5
-6.1928 49.6203 6.1 10.4 28.6 7 641 62.9 21
-6.1728 49.6203 6.1 10.4 28.6 6.9 650 63.2 20.5
-6.1527 49.6203 6.1 10.4 28.5 6.8 650 63.6 20.1
-6.1327 49.6203 6.1 10.4 28.4 6.8 650 63.9 19.7
-6.1127 49.6203 6.1 10.4 28.3 6.7 650 64.4 19.4
-6.0926 49.6203 6.1 10.4 28.3 6.6 650 64.4 19.2
-6.0726 49.6203 6.1 10.4 28.2 6.5 650 62.4 18.5
-6.0526 49.6203 6.1 10.4 28.1 6.5 650 60 17.8
-6.0326 49.6203 6.1 10.4 28.2 6.5 650 60.3 17.9
-6.0125 49.6203 6.1 10.4 28.2 6.5 650 60.6 18
-5.9925 49.6203 6.1 10.4 28.2 6.5 650 60.9 18.2
-5.9725 49.6203 6.1 10.4 28.2 6.6 650 61 18.2
-5.9524 49.6203 6.1 10.4 28.2 6.6 650 61.5 18.3
-5.9324 49.6203 6.1 10.4 28.2 6.6 643 61.6 18.3
-5.9124 49.6203 6.1 10.4 28.2 6.7 600 61.8 18.5
-5.8923 49.6203 6.1 10.4 28.2 6.7 600 61.9 18.7
-5.8723 49.6203 6.1 10.4 28.2 6.7 600 62 19
-5.8523 49.6203 6.1 10.4 28.2 6.7 600 62.1 19.4
-5.8322 49.6203 6.1 10.4 28.2 6.8 600 62.2 20
-5.8122 49.6203 6.1 10.3 28.2 6.8 600 62.3 19.9
-5.7922 49.6203 6.1 10.3 28.2 6.8 600 62.4 19.6
-5.7721 49.6203 6.1 10.3 28.3 6.8 600 62.1 19.3
-5.7521 49.6203 6.1 10.3 28.2 6.9 600 61.9 19.4
-5.7321 49.6203 6.1 10.3 28.1 6.9 600 62.1 19.6
-5.7121 49.6203 6.1 10.3 28.1 6.9 600 62.2 19.6
-5.692 49.6203 6.1 10.3 28.1 6.9 600 62.4 19.7
-5.672 49.6203 6.1 10.3 28 6.9 600 62.5 19.8
-5.652 49.6203 6.1 10.3 28 6.9 600 62.5 19.9
-5.6319 49.6203 6.1 10.3 27.9 6.9 583 62 19.9
-5.6119 49.6203 6.1 10.3 27.9 6.9 575 61.5 19.9
-5.5919 49.6203 6.1 10.3 27.9 6.9 575 61.6 20.1
-5.5718 49.6203 6.1 10.3 27.8 6.9 575 61.8 20.2
-5.5518 49.6203 6.1 10.3 27.8 6.9 575 61.8 20.4
-5.5318 49.6203 6.1 10.3 27.7 6.9 575 61.7 20.5
-5.5117 49.6203 6.1 10.3 27.7 6.9 575 61.8 20.6
-5.4917 49.6203 6.1 10.3 27.7 6.9 575 61.8 20.7
-5.4717 49.6203 6.1 10.3 27.6 6.9 575 61.6 20.8
-5.4516 49.6203 6.1 10.3 27.6 6.8 575 61.4 20.9
-5.4316 49.6203 6.1 10.3 27.5 6.8 575 61.3 20.7
-5.4116 49.6203 6.1 10.3 27.5 6.8 575 61.4 20.7
-5.3915 49.6203 6.1 10.3 27.5 6.8 575 61.4 20.6
-5.3715 49.6203 6.1 10.3 27.4 6.8 570 61.5 20.4
-5.3515 49.6203 6.1 10.3 27.4 6.7 550 61.6 20.1
-5.3315 49.6203 6.1 10.3 27.4 6.7 550 61.6 19.9
-5.3114 49.6203 6.1 10.3 27.3 6.7 550 61.5 19.7
-5.2914 49.6203 6.1 10.3 27.3 6.7 550 61.4 19.6
-5.2714 49.6203 6.1 10.3 27.2 6.6 550 61.4 19.4
-5.2513 49.6203 6.1 10.3 27.2 6.6 550 61.5 19.4
-5.2313 49.6203 6.1 10.3 27.2 6.6 550 61.6 19.3
-5.2113 49.6203 6.1 10.3 27.1 6.6 550 61.7 19.5
-5.1912 49.6203 6.1 10.3 27 6.6 550 61.8 20.1
-5.1712 49.6203 6.1 10.3 26.9 6.5 550 61.9 20.5
-5.1512 49.6203 6.1 10.3 26.9 6.5 550 62.2 20.1
-5.1311 49.6203 6.1 10.3 26.8 6.5 550 62.5 19.4
-5.1111 49.6203 6.1 10.3 26.7 6.4 550 62.8 18.8
-5.0911 49.6203 6.1 10.3 26.7 6.4 532 62.9 18.7
-5.071 49.6203 6.2 10.3 26.6 6.3 525 63 18.6
-5.051 49.6203 6.2 10.3 26.5 6.3 525 63.1 18.5
-5.031 49.6203 6.2 10.3 26.5 6.3 525 63.2 18.4
-5.011 49.6203 6.2 10.3 26.4 6.2 525 63.3 18.3
-4.9909 49.6203 6.2 10.3 26.3 6.2 525 63.6 18.3
-4.9709 49.6203 6.2 10.3 26.3 6.1 525 64.1 18.3
-4.9509 49.6203 6.2 10.3 26.2 6.1 525 64.6 18.3
-4.9308 49.6203 6.2 10.3 26.1 6 525 64.8 18.5
-4.9108 49.6203 6.2 10.3 26 6 525 64.9 18.9
-4.8908 49.6203 6.2 10.3 25.9 6 525 65 18.9
-4.8707 49.6203 6.2 10.3 25.8 5.9 525 65.1 18.3
-4.8507 49.6203 6.2 10.3 25.7 5.9 525 65.2 17.7
-4.8307 49.6203 6.2 10.3 25.6 5.8 525 65.2 17.4
-4.8106 49.6203 6.2 10.3 25.5 5.8 525 65.3 17.3
-4.7906 49.6203 6.2 10.3 25.4 5.7 525 65.4 17.1
-4.7706 49.6203 6.2 10.3 25.4 5.7 525 65.4 17
-4.7505 49.6203 6.2 10.3 25.3 5.6 525 65.5 17
-4.7305 49.6203 6.2 10.3 25.2 5.6 525 65.6 16.9
-4.7105 49.6203 6.2 10.3 25.1 5.5 525 65.7 16.9
-4.6905 49.6203 6.2 10.3 25 5.5 525 65.8 16.9
-4.6704 49.6203 6.2 10.3 25 5.5 525 65.8 16.9
-4.6504 49.6203 6.2 10.3 24.9 5.5 525 65.9 16.9
-4.6304 49.6203 6.2 10.3 24.8 5.5 525 66 17
-4.6103 49.6203 6.2 10.3 24.7 5.5 525 66.1 17
-4.5903 49.6203 6.2 10.3 24.6 5.5 525 66 17
-4.5703 49.6203 6.2 10.3 24.6 5.5 525 66 17
-4.5502 49.6203 6.2 10.3 24.5 5.5 525 65.8 17
-4.5302 49.6203 6.2 10.3 24.4 5.4 506 65.8 17.1
-4.5102 49.6203 6.2 10.3 24.3 5.4 500 65.9 17.2
-4.4901 49.6203 6.2 10.3 24.2 5.4 500 65.7 17.3
-4.4701 49.6203 6.2 10.3 24.2 5.4 500 65.5 17.3
-4.4501 49.6203 6.2 10.3 24.1 5.4 500 65.6 17.4
-4.43 49.6203 6.2 10.3 24.1 5.4 500 65.6 17.5
-4.41 49.6203 6.2 10.3 24 5.4 500 65.7 17.7
-4.39 49.6203 6.2 10.3 24 5.4 500 65.8 17.9
-4.37 49.6203 6.2 10.3 24 5.4 500 65.8 18.2
-4.3499 49.6203 6.2 10.3 23.9 5.4 500 65.9 18.4
-4.3299 49.6203 6.2 10.2 23.9 5.4 500 66 18.6
-4.3099 49.6203 6.2 10.2 23.9 5.4 500 66 18.7
-4.2898 49.6203 6.2 10.2 23.8 5.5 500 66.1 18.9
-4.2698 49.6203 6.3 10.2 23.8 5.5 489 66.2 19.1
-4.2498 49.6203 6.3 10.2 23.7 5.5 450 66.2 19.4
-4.2297 49.6203 6.3 10.2 23.7 5.5 450 66.2 19.7
-4.2097 49.6203 6.3 10.2 23.7 5.5 450 66.3 19.9
-4.1897 49.6203 6.3 10.2 23.6 5.5 450 66.3 20.2
-4.1696 49.6203 6.3 10.2 23.5 5.5 450 66.4 20.6
-4.1496 49.6203 6.3 10.2 23.5 5.5 450 66.5 20.9
-4.1296 49.6203 6.3 10.2 23.4 5.6 450 66.6 21.3
-4.1095 49.6203 6.3 10.2 23.4 5.6 450 66.7 21.6
-4.0895 49.6203 6.3 10.1 23.4 5.5 450 67 22
-4.0695 49.6203 6.3 10.1 23.4 5.5 450 67.4 22.5
-4.0495 49.6203 6.3 10.1 23.5 5.5 450 67.6 22.8
-4.0294 49.6203 6.3 10 23.5 5.5 450 67.7 23
-4.0094 49.6203 6.3 10 23.5 5.5 450 67.8 23.2
-3.9894 49.6203 6.3 10 23.5 5.5 376 67.8 23.3
-3.9693 49.6203 6.3 10 23.5 5.5 350 67.8 23.3
-3.9493 49.6203 6.3 9.9 23.6 5.5 350 67.8 23.3
-3.9293 49.6203 6.4 9.9 23.6 5.5 350 67.8 23.3
-3.9092 49.6203 6.4 9.9 23.5 5.6 350 67.8 23.3
-3.8892 49.6203 6.4 9.9 23.5 5.6 350 67.8 23.2
-3.8692 49.6203 6.4 9.9 23.5 5.7 350 67.8 23.1
-3.8491 49.6203 6.4 9.9 23.5 5.7 350 67.8 23.1
-3.8291 49.6203 6.4 9.8 23.5 5.7 350 67.8 23.1
-3.8091 49.6203 6.4 9.8 23.5 5.7 350 67.8 23.2
-3.789 49.6203 6.4 9.8 23.4 5.7 350 67.7 23.2
-3.769 49.6203 6.4 9.8 23.4 5.7 350 67.7 23.3
-3.749 49.6203 6.4 9.8 23.4 5.7 350 67.7 23.4
-3.729 49.6203 6.4 9.7 23.4 5.7 350 67.8 23.5
-3.7089 49.6203 6.4 9.7 23.4 5.7 330 67.8 23.5
-3.6889 49.6203 6.4 9.7 23.4 5.7 275 67.8 23.6
-3.6689 49.6203 6.4 9.7 23.4 5.7 275 67.8 23.7
-3.6488 49.6203 6.4 9.7 23.3 5.7 275 67.8 23.7
-3.6288 49.6203 6.4 9.7 23.2 5.7 275 67.8 23.7
-3.6088 49.6203 6.4 9.7 23.1 5.6 275 67.8 23.7
-3.5887 49.6203 6.4 9.8 23 5.6 275 67.8 23.6
-3.5687 49.6203 6.4 9.8 22.9 5.5 275 67.8 23.5
-3.5487 49.6203 6.4 9.8 22.8 5.5 275 67.8 23.4
-3.5286 49.6203 6.4 9.8 22.7 5.5 275 67.8 23.3
-3.5086 49.6203 6.4 9.8 22.7 5.5 275 67.8 23.1
-3.4886 49.6203 6.4 9.8 22.6 5.5 275 68.2 23.1
-3.4685 49.6203 6.5 9.8 22.5 5.5 275 68.8 23
-3.4485 49.6203 6.5 9.8 22.5 5.5 275 68.7 22.6
-3.4285 49.6203 6.5 9.8 22.4 5.4 275 68.7 22.5
-3.4085 49.6203 6.5 9.8 22.4 5.4 275 69.1 22.4
-3.3884 49.6203 6.5 9.8 22.3 5.4 275 69.7 22.4
-3.3684 49.6203 6.5 9.8 22.3 5.4 275 69.8 22.4
-3.3484 49.6203 6.5 9.7 22.3 5.3 275 69.7 22.4
-3.3283 49.6203 6.5 9.7 22.2 5.3 275 69.7 22.4
-3.3083 49.6203 6.5 9.7 22.2 5.3 275 69.5 22.4
-3.2883 49.6203 6.5 9.7 22.2 5.2 275 69.4 22.4
-3.2682 49.6203 6.5 9.7 22.1 5.2 275 69.2 22.4
-3.2482 49.6203 6.5 9.7 21.9 5.1 275 68.8 22.4
-3.2282 49.6203 6.5 9.7 21.8 5.1 275 68.9 22.6
-3.2081 49.6203 6.5 9.8 21.7 5.1 277 69.9 22.8
-3.1881 49.6203 6.5 9.8 21.5 5 357 69.5 22.8
-3.1681 49.6203 6.5 9.8 21.4 5 371 69 22.9
-3.148 49.6203 6.5 9.8 21.3 4.9 367 69.8 23.3
-3.128 49.6203 6.5 9.8 21.2 4.9 350 73.3 24.5
-3.108 49.6203 6.5 9.8 21.3 5 350 76.6 25.6
-3.0879 49.6203 6.5 9.8 21.3 5 350 76.4 25.9
-3.0679 49.6203 6.5 9.8 21.3 5.1 350 75.8 26.3
-3.0479 49.6203 6.5 9.7 21.4 5.1 334 75.4 26.6
-3.0279 49.6203 6.5 9.7 21.4 5.2 309 75.3 27
-3.0078 49.6203 6.5 9.7 21.4 5.2 309 75.1 27.2
-2.9878 49.6203 6.5 9.7 21.5 5.3 309 75 27.5
-2.9678 49.6203 6.5 9.6 21.5 5.3 309 75 27.7
-2.9477 49.6203 6.5 9.6 21.5 5.4 309 74.9 27.8
-2.9277 49.6203 6.5 9.6 21.5 5.5 300 74.9 28
-2.9077 49.6203 6.5 9.6 21.5 5.5 300 74.9 28.2
-2.8876 49.6203 6.5 9.6 21.5 5.5 300 74.9 28.3
-2.8676 49.6203 6.5 9.6 21.5 5.5 300 75 28.7
-2.8476 49.6203 6.5 9.6 21.4 5.5 300 75 29.1
-2.8275 49.6203 6.5 9.6 21.4 5.5 300 75.1 29.4
-2.8075 49.6203 6.5 9.6 21.3 5.4 300 75.1 29.9
-2.7875 49.6203 6.5 9.6 21.3 5.4 300 75.2 30.4
-2.7674 49.6203 6.5 9.6 21.2 5.4 300 75.3 30.7
-2.7474 49.6203 6.5 9.6 21.2 5.4 300 75.5 31
-2.7274 49.6203 6.5 9.6 21.1 5.4 300 75.6 31.3
-2.7074 49.6203 6.5 9.6 21.1 5.4 300 75.9 31.5
-2.6873 49.6203 6.5 9.6 21.2 5.4 300 76.2 31.8
-2.6673 49.6203 6.5 9.6 21.2 5.4 300 76.4 32.2
-2.6473 49.6203 6.5 9.6 21.2 5.3 300 76.8 32
-2.6272 49.6203 6.5 9.6 21.2 5.3 300 77.2 31.4
-2.6072 49.6203 6.5 9.5 21.2 5.3 300 77.5 30.8
-2.5872 49.6203 6.5 9.5 21.2 5.4 300 78.4 30.8
-2.5671 49.6203 6.5 9.5 21.2 5.4 300 79 30.9
-2.5471 49.6203 6.5 9.5 21.2 5.4 300 79.6 31
-2.5271 49.6203 6.5 9.5 21.2 5.4 300 80.4 31
-2.507 49.6203 6.5 9.5 21.2 5.4 300 81.5 31.3
-2.487 49.6203 6.5 9.5 21.2 5.4 300 82.3 31.5
-2.467 49.6203 6.5 9.5 21.2 5.4 300 83.2 31.7
-2.4469 49.6203 6.5 9.5 21.3 5.4 300 83.9 31.9
-2.4269 49.6203 6.5 9.5 21.3 5.4 300 82.4 31.4
-2.4069 49.6203 6.5 9.5 21.3 5.5 300 71.7 27.7
-2.3869 49.6203 6.5 9.5 21.4 5.5 300 61.6 24.2
-2.3668 49.6203 6.5 9.4 21.4 5.5 300 63.7 25.1
-2.3468 49.6203 6.5 9.4 21.4 5.5 300 75.3 29.1
-2.3268 49.6203 6.5 9.4 21.3 5.5 300 84 32.3
-2.3067 49.6203 6.5 9.4 21.3 5.5 300 83.8 32.5
-2.2867 49.6203 6.5 9.4 21.3 5.5 300 83.8 32.8
-2.2667 49.6203 6.5 9.4 21.3 5.5 300 81.2 32.1
-2.2466 49.6203 6.5 9.4 21.3 5.5 300 71.4 28.6
-2.2266 49.6203 6.5 9.4 21.3 5.5 300 63.7 25.9
-2.2066 49.6203 6.5 9.4 21.3 5.5 300 60.7 24.9
-2.1865 49.6203 6.5 9.4 21.3 5.6 300 61.3 25.3
-2.1665 49.6203 6.5 9.4 21.2 5.5 300 62.8 26.2
-2.1465 49.6203 6.5 9.4 21.2 5.5 300 74.2 30.6
-2.1264 49.6203 6.5 9.4 21.1 5.5 300 84.5 34.6
-2.1064 49.6203 6.5 9.4 21.1 5.5 300 86.8 35.5
-2.0864 49.6203 6.5 9.4 21.1 5.5 300 74.9 31.1
-2.0664 49.6203 6.5 9.4 21.1 5.5 300 67.6 28.5
-2.0463 49.6203 6.5 9.4 21.1 5.5 300 65.2 27.7
-2.0263 49.6203 6.5 9.3 21.1 5.5 300 66.5 28.5
-2.0063 49.6203 6.5 9.3 21.1 5.6 300 67.5 29.2
-1.9862 49.6203 6.5 9.3 21.1 5.6 300 67.8 29.4
-1.9662 49.6203 6.5 9.3 21.1 5.6 300 67.7 29.4
-1.9462 49.6203 6.5 9.3 21.1 5.6 300 67.6 29.5
-1.9261 49.6203 6.5 9.3 21.1 5.7 300 67.1 29.5
-1.9061 49.6203 6.5 9.3 21.1 5.7 300 66.4 29.5
-1.8861 49.6203 6.5 9.2 21.1 5.7 300 66.1 29.6
-1.866 49.6203 6.5 9.2 21.1 5.7 300 68.7 31.1
-1.846 49.6203 6.5 9.2 21.1 5.7 300 72.2 32.6
-1.826 49.6203 6.5 9.2 21.1 5.7 300 75.1 33.7
-1.8059 49.6203 6.5 9.2 21.1 5.7 300 74.7 33.4
-1.7859 49.6203 6.5 9.2 21 5.7 300 74.1 33.2
-1.7659 49.6203 6.5 9.2 21 5.7 322 73.7 33
-1.7459 49.6203 6.5 9.2 21 5.7 325 73.6 33
-1.7258 49.6203 6.5 9.2 21 5.7 325 73.4 32.9
-1.7058 49.6203 6.5 9.2 21 5.7 325 73.4 32.8
-1.6858 49.6203 6.5 9.2 21 5.7 325 73.4 32.7
-1.6657 49.6203 6.5 9.2 20.9 5.7 325 73.4 32.6
-1.6457 49.6203 6.5 9.2 20.9 5.7 325 73.5 32.5
-1.6257 49.6203 6.5 9.2 20.9 5.7 325 73.7 32.4
-1.6056 49.6203 6.5 9.2 20.9 5.7 325 73.2 32.1
-1.5856 49.6203 6.5 9.3 21 5.7 325 73.1 32.2
-1.5656 49.6203 6.4 9.3 21 5.7 325 72.8 32.2
-1.5455 49.6203 6.5 9.3 21 5.6 325 73.5 32.4
-1.5255 49.6203 6.4 9.3 21 5.6 325 73.5 32.1
-1.5055 49.6203 6.4 9.3 21 5.6 325 73.4 31.8
-1.4854 49.6203 6.4 9.3 21 5.6 345 73.4 31.4
-1.4654 49.6203 6.4 9.4 21 5.6 375 73.3 31.3
-1.4454 49.6203 6.4 9.4 21 5.6 375 73.3 31.1
-1.4254 49.6203 6.4 9.4 21 5.5 375 73.2 30.9
-1.4053 49.6203 6.4 9.4 21 5.5 375 73.1 30.6
-1.3853 49.6203 6.4 9.4 20.9 5.5 375 73.1 30.5
-1.3653 49.6203 6.4 9.4 20.9 5.5 375 73.2 30.4
-1.3452 49.6203 6.4 9.5 21 5.5 375 73.3 30.2
-1.3252 49.6203 6.4 9.5 21.1 5.5 375 73.5 30
-1.3052 49.6203 6.4 9.5 21.2 5.5 375 73.6 29.8
-1.2851 49.6203 6.4 9.5 21.3 5.5 375 73.9 29.6
-1.2651 49.6203 6.4 9.5 21.4 5.5 375 74.2 29.5
-1.2451 49.6203 6.4 9.5 21.6 5.6 375 73.8 29
-1.225 49.6203 6.4 9.6 21.7 5.6 375 70.5 27.6
-1.205 49.6203 6.4 9.6 21.8 5.6 443 66.5 26.1
-1.185 49.6203 6.4 9.6 21.9 5.6 450 64.2 25.2
-1.1649 49.6203 6.4 9.6 22 5.6 450 64.3 25
-1.1449 49.6203 6.4 9.6 22.1 5.6 450 64.7 24.8
-1.1249 49.6203 6.4 9.6 22.2 5.7 450 64.7 24.4
-1.1049 49.6203 6.4 9.7 22.3 5.7 450 64.6 24.2
-1.0848 49.6203 6.4 9.7 22.4 5.7 450 64.5 23.8
-1.0648 49.6203 6.4 9.7 22.6 5.7 450 64.1 23.6
-1.0448 49.6203 6.4 9.7 22.7 5.8 450 63.8 23.2
-1.0247 49.6203 6.4 9.7 22.8 5.8 450 63 23
-1.0047 49.6203 6.4 9.7 23 5.8 450 62 22.7
-0.9847 49.6203 6.4 9.7 23.1 5.9 450 63.4 23.1
-0.9646 49.6203 6.4 9.7 23.3 5.9 450 64.3 23.1
-0.9446 49.6203 6.4 9.7 23.4 5.9 460 64.5 22.9
-0.9246 49.6203 6.4 9.7 23.5 5.9 475 63.1 22.2
-0.9045 49.6203 6.4 9.7 23.7 6 475 63.1 22.1
-0.8845 49.6203 6.4 9.7 23.9 6 475 63.2 21.9
-0.8645 49.6203 6.4 9.7 24 6.1 475 62.9 21.7
-0.8444 49.6203 6.4 9.7 24.1 6.1 475 62.4 21.4
-0.8244 49.6203 6.4 9.7 24.2 6.1 475 61.3 21
-0.8044 49.6203 6.4 9.7 24.3 6.1 475 59.9 20.5
-0.7844 49.6203 6.4 9.7 24.4 6.1 475 58.3 20
-0.7643 49.6203 6.4 9.7 24.5 6.1 475 59.9 20.7
-0.7443 49.6203 6.4 9.7 24.6 6.2 475 68.6 24.2
-0.7243 49.6203 6.4 9.7 24.6 6.2 475 77.3 27.3
-0.7042 49.6203 6.4 9.7 24.7 6.2 475 82.1 28.3
-0.6842 49.6203 6.4 9.7 24.8 6.2 475 81.5 27.2
-0.6642 49.6203 6.4 9.8 24.9 6.3 475 82.1 27.2
-0.6441 49.6203 6.4 9.8 24.9 6.3 523 83 27.5
-0.6241 49.6203 6.4 9.8 25 6.3 525 78.4 26.1
-0.6041 49.6203 6.4 9.8 25.1 6.3 525 67.8 23
-0.584 49.6203 6.4 9.8 25.2 6.3 525 58.3 20.3
-0.564 49.6203 6.4 9.8 25.3 6.4 525 58.3 20.2
-0.544 49.6203 6.4 9.8 25.4 6.4 525 60.4 20.7
-0.5239 49.6203 6.4 9.8 25.5 6.5 525 62.1 20.9
-0.5039 49.6203 6.4 9.8 25.6 6.5 525 62.9 21
-0.4839 49.6203 6.4 9.8 25.6 6.5 525 63.5 21.2
-0.4638 49.6203 6.4 9.8 25.7 6.5 525 63.9 21.1
-0.4438 49.6203 6.4 9.8 25.7 6.5 525 64.2 21
-0.4238 49.6203 6.4 9.8 25.8 6.5 525 64.4 20.7
-0.4038 49.6203 6.4 9.8 25.8 6.5 525 64.5 20.5
-0.3837 49.6203 6.4 9.8 25.9 6.5 536 64.6 20.3
-0.3637 49.6203 6.4 9.8 25.9 6.6 550 64.6 20.2
-0.3437 49.6203 6.4 9.8 26.1 6.6 550 64.7 20
-0.3236 49.6203 6.4 9.8 26.1 6.6 550 64.7 19.9
-0.3036 49.6203 6.4 9.8 26.2 6.6 550 64.8 19.7
-0.2836 49.6203 6.4 9.8 26.2 6.6 550 64.8 19.6
-0.2635 49.6203 6.4 9.8 26.2 6.6 550 64.8 19.5
-0.2435 49.6203 6.4 9.8 26.3 6.6 550 64.8 19.4
-0.2235 49.6203 6.4 9.8 26.3 6.6 550 64.8 19.3
-0.2034 49.6203 6.4 9.8 26.3 6.6 550 64.8 19.3
-0.1834 49.6203 6.4 9.8 26.4 6.6 550 64.8 19.4
-0.1634 49.6203 6.4 9.8 26.4 6.6 550 64.8 19.5
-0.1433 49.6203 6.4 9.8 26.4 6.6 550 64.8 19.3
-0.1233 49.6203 6.4 9.8 26.4 6.6 550 64.8 19.1
-0.1033 49.6203 6.4 9.8 26.4 6.6 574 64.7 19
-0.0833 49.6203 6.4 9.8 26.5 6.6 575 64.7 18.9
-0.0632 49.6203 6.4 9.8 26.5 6.6 575 64.7 19
-0.0432 49.6203 6.4 9.8 26.6 6.7 575 64.7 19
-0.0232 49.6203 6.4 9.8 26.6 6.7 575 64.7 19.1
-0.0031 49.6203 6.4 9.8 26.7 6.7 575 64.6 19.2
0.0169 49.6203 6.4 9.8 26.7 6.8 575 64.6 19.3
0.0369 49.6203 6.4 9.8 26.8 6.8 575 64.6 19.5
0.057 49.6203 6.4 9.8 26.8 6.8 575 64.6 19.7
0.077 49.6203 6.4 9.9 26.9 6.8 575 64.5 20.1
0.097 49.6203 6.4 10 26.9 6.9 575 64.5 20.7
0.1171 49.6203 6.5 10 27 6.9 575 64.4 21.2
0.1371 49.6203 6.5 10.1 27 6.9 575 64.4 21.1
0.1571 49.6203 6.5 10.1 27 6.9 575 64.4 20.6
0.1772 49.6203 6.5 10.2 27.1 7 575 64.4 19.9
0.1972 49.6203 6.5 10.2 27.1 7 575 64.3 20
0.2172 49.6203 6.5 10.2 27.2 7 575 64.3 20.1
0.2372 49.6203 6.5 10.1 27.2 7 575 64.3 20.1
0.2573 49.6203 6.5 10.1 27.3 7.1 575 64.2 20.2
0.2773 49.6203 6.5 10.1 27.3 7.1 575 64.2 20.3
0.2973 49.6203 6.5 10.1 27.4 7.1 575 64.1 20.3
0.3174 49.6203 6.5 10.1 27.4 7.1 575 64.1 20.4
0.3374 49.6203 6.5 10 27.5 7.1 575 64.1 20.5
0.3574 49.6203 6.5 9.9 27.5 7.2 575 64.1 20.6
0.3775 49.6203 6.4 9.8 27.5 7.2 575 64 20.7
0.3975 49.6203 6.4 9.8 27.6 7.2 575 64 20.7
0.4175 49.6203 6.4 9.7 27.6 7.2 575 64 20.7
0.4376 49.6203 6.4 9.7 27.6 7.2 575 63.9 20.7
0.4576 49.6203 6.4 9.7 27.7 7.2 575 63.9 20.6
0.4776 49.6203 6.4 9.7 27.7 7.2 575 63.9 20.7
0.4977 49.6203 6.4 9.7 27.7 7.3 575 63.9 20.7
0.5177 49.6203 6.4 9.7 27.8 7.3 575 63.9 20.8
0.5377 49.6203 6.4 9.7 27.8 7.3 575 63.8 20.9
0.5577 49.6203 6.4 9.7 27.8 7.3 575 63.8 21
0.5778 49.6203 6.4 9.7 27.9 7.4 575 63.8 21.2
0.5978 49.6203 6.4 9.7 27.9 7.4 575 63.8 21.4
0.6178 49.6203 6.4 9.6 27.9 7.4 575 63.8 21.7
0.6379 49.6203 6.4 9.6 28 7.4 575 63.7 21.9
0.6579 49.6203 6.4 9.6 28 7.5 575 63.7 22.2
0.6779 49.6203 6.4 9.6 28 7.5 575 63.7 22.5
0.698 49.6203 6.4 9.6 28.1 7.5 575 63.7 22.6
0.718 49.6203 6.4 9.6 28.1 7.6 575 63.7 22.7
0.738 49.6203 6.4 9.6 28.2 7.6 575 63.7 22.8
0.7581 49.6203 6.4 9.6 28.2 7.6 575 63.6 22.9
0.7781 49.6203 6.4 9.6 28.2 7.7 575 63.6 23
0.7981 49.6203 6.4 9.6 28.2 7.7 575 63.6 23.2
0.8182 49.6203 6.4 9.6 28.3 7.7 575 63.6 23.4
0.8382 49.6203 6.4 9.6 28.3 7.7 575 63.6 23.6
0.8582 49.6203 6.4 9.6 28.4 7.8 575 63.6 23.6
0.8782 49.6203 6.4 9.6 28.4 7.8 575 63.6 23.4
0.8983 49.6203 6.4 9.6 28.4 7.8 575 63.6 23.3
0.9183 49.6203 6.4 9.6 28.4 7.8 575 63.6 23.1
0.9383 49.6203 6.4 9.6 28.3 7.8 575 63.6 23
0.9584 49.6203 6.4 9.6 28.3 7.7 575 63.6 22.9
0.9784 49.6203 6.4 9.6 28.3 7.7 575 63.6 22.5
0.9984 49.6203 6.4 9.6 28.2 7.6 575 63.6 21.8
1.0185 49.6203 6.4 9.6 28.2 7.6 600 63.6 21.2
1.0385 49.6203 6.4 9.6 28.1 7.5 600 63.5 21
1.0585 49.6203 6.4 9.6 28.1 7.5 600 63.5 20.8
1.0786 49.6203 6.4 9.6 28 7.4 600 63.5 20.6
1.0986 49.6203 6.4 9.6 28 7.4 600 63.5 20.5
1.1186 49.6203 6.4 9.6 28 7.3 600 63.5 20.3
1.1387 49.6203 6.4 9.6 27.9 7.3 600 63.5 20.2
1.1587 49.6203 6.4 9.6 27.9 7.3 600 63.5 20.2
1.1787 49.6203 6.4 9.6 28 7.3 600 63.5 20.2
1.1987 49.6203 6.4 9.6 28 7.3 600 63.5 20.2
1.2188 49.6203 6.5 9.6 28 7.3 600 63.5 20.2
1.2388 49.6203 6.5 9.6 28 7.3 600 63.4 20.2
1.2588 49.6203 6.5 9.6 28 7.3 600 63.4 20.2
1.2789 49.6203 6.5 9.6 28 7.3 600 63.4 20.2
1.2989 49.6203 6.5 9.6 28 7.3 600 63.4 20.1
1.3189 49.6203 6.5 9.6 28.1 7.3 600 63.4 20.1
1.339 49.6203 6.5 9.6 28.1 7.3 600 63.4 20.1
1.359 49.6203 6.5 9.6 28.1 7.3 600 63.4 20.1
1.379 49.6203 6.5 9.6 28.1 7.3 600 63.4 20.1
1.3991 49.6203 6.5 9.5 28.1 7.3 600 63.4 20.2
1.4191 49.6203 6.5 9.5 28.1 7.3 600 63.4 20.2
1.4391 49.6203 6.5 9.5 28.1 7.3 600 63.4 20.2
1.4592 49.6203 6.5 9.5 28.2 7.4 600 63.4 20.2
1.4792 49.6203 6.5 9.5 28.2 7.4 600 63.4 20.4
1.4992 49.6203 6.5 9.5 28.2 7.4 600 63.3 20.5
1.5192 49.6203 6.5 9.5 28.2 7.4 600 63.3 20.6
1.5393 49.6203 6.5 9.5 28.3 7.4 600 63.3 20.6
1.5593 49.6203 6.5 9.5 28.3 7.4 600 63.3 20.5
1.5793 49.6203 6.5 9.5 28.3 7.4 600 63.3 20.6
1.5994 49.6203 6.5 9.5 28.3 7.5 600 63.3 20.8
1.6194 49.6203 6.5 9.5 28.4 7.5 600 63.3 21
1.6394 49.6203 6.5 9.5 28.4 7.5 600 63.3 21
1.6595 49.6203 6.5 9.5 28.4 7.5 600 63.3 21
1.6795 49.6203 6.5 9.5 28.4 7.5 600 63.2 21.1
1.6995 49.6203 6.5 9.5 28.5 7.6 600 63.2 21.3
1.7196 49.6203 6.5 9.4 28.5 7.6 600 63.2 21.6
1.7396 49.6203 6.5 9.4 28.6 7.7 600 63.2 21.9
1.7596 49.6203 6.5 9.4 28.6 7.8 600 63.1 22.4
1.7797 49.6203 6.5 9.4 28.7 7.8 600 63.1 22.9
1.7997 49.6203 6.5 9.4 28.7 7.9 600 63.1 23.6
1.8197 49.6203 6.5 9.3 28.8 8.1 600 63 24.7
1.8397 49.6203 6.5 9.3 28.9 8.1 558 63 25.2
1.8598 49.6203 6.5 9.3 28.9 8.2 525 63 25.5
1.8798 49.6203 6.5 9.3 29 8.3 525 62.9 26.2
1.8998 49.6203 6.5 9.3 29 8.3 525 62.9 27
1.9199 49.6203 6.5 9.3 29.1 8.4 525 62.9 27.6
1.9399 49.6203 6.6 9.4 29.1 8.4 525 62.8 28.1
1.9599 49.6203 6.6 9.5 29.2 8.4 525 62.8 28.8
1.98 49.6203 6.6 9.5 29.3 8.5 525 62.7 29.9
2 49.6203 6.6 9.5 29.4 8.6 525 62.7 31.2
-10.8 49.6403 6.3 10.1 30.8 8 550 58.8 21.1
-10.78 49.6403 6.3 10.1 30.8 8 550 58.9 21.4
-10.7599 49.6403 6.3 10.2 30.8 8 550 58.9 21.9
-10.7399 49.6403 6.3 10.2 30.8 8 550 58.9 22.6
-10.7199 49.6403 6.3 10.2 30.7 7.9 550 58.9 23.3
-10.6998 49.6403 6.3 10.2 30.8 8 550 58.9 23.7
-10.6798 49.6403 6.3 10.2 30.9 8.1 550 58.8 23.9
-10.6598 49.6403 6.3 10.1 31 8.1 550 58.8 24.5
-10.6397 49.6403 6.3 10.1 31.1 8.2 550 58.7 25.5
-10.6197 49.6403 6.3 10.1 31.2 8.3 550 58.7 26.6
-10.5997 49.6403 6.3 10.1 31.3 8.4 550 58.6 27.7
-10.5797 49.6403 6.3 10.1 31.5 8.6 550 58.4 28.7
-10.5596 49.6403 6.3 10.1 31.6 8.7 550 58.2 29.3
-10.5396 49.6403 6.3 10.1 31.7 8.8 550 58.2 29.2
-10.5196 49.6403 6.3 10.1 31.8 8.9 550 58.2 29.5
-10.4995 49.6403 6.3 10.1 31.9 9 550 58.2 30
-10.4795 49.6403 6.3 10.1 32 9.1 550 58.2 30.7
-10.4595 49.6403 6.3 10.1 32.1 9.2 550 58.5 31.7
-10.4394 49.6403 6.3 10.1 32.2 9.2 550 58.5 32.3
-10.4194 49.6403 6.3 10.1 32.2 9.3 550 58.5 33.1
-10.3994 49.6403 6.3 10.1 32.3 9.3 550 58.5 34.1
-10.3793 49.6403 6.3 10.1 32.3 9.4 550 58.5 34.9
-10.3593 49.6403 6.3 10.1 32.4 9.5 550 58.5 35.2
-10.3393 49.6403 6.3 10.1 32.4 9.5 574 58.4 35.6
-10.3192 49.6403 6.3 10.1 32.5 9.6 575 58.4 36.4
-10.2992 49.6403 6.3 10.1 32.5 9.6 575 58.4 37.2
-10.2792 49.6403 6.3 10.1 32.6 9.7 575 58.4 38.2
-10.2592 49.6403 6.3 10.2 32.6 9.8 575 58.4 39.3
-10.2391 49.6403 6.3 10.2 32.7 9.8 575 58.3 40.3
-10.2191 49.6403 6.3 10.2 32.7 9.9 575 58.3 41.2
-10.1991 49.6403 6.3 10.2 32.8 9.9 575 58.3 41.6
-10.179 49.6403 6.3 10.2 32.8 9.9 575 58.3 41.7
-10.159 49.6403 6.3 10.2 32.8 9.9 575 58.2 40.8
-10.139 49.6403 6.3 10.2 32.9 9.9 575 58.2 39.8
-10.1189 49.6403 6.3 10.2 32.9 9.9 575 58.3 38.8
-10.0989 49.6403 6.2 10.2 32.9 9.9 575 58.6 38
-10.0789 49.6403 6.2 10.2 32.9 9.9 586 59 37
-10.0588 49.6403 6.2 10.2 32.9 9.9 600 59.3 36.3
-10.0388 49.6403 6.2 10.2 32.9 9.8 600 59.2 35.7
-10.0188 49.6403 6.2 10.2 32.9 9.8 600 59.2 35.2
-9.9987 49.6403 6.2 10.2 33 9.8 600 59.1 35
-9.9787 49.6403 6.2 10.3 33 9.8 600 59 34.8
-9.9587 49.6403 6.2 10.3 33 9.8 600 59 34.7
-9.9387 49.6403 6.2 10.3 33 9.8 600 59.4 34.6
-9.9186 49.6403 6.2 10.3 33 9.8 600 60.1 34.5
-9.8986 49.6403 6.2 10.3 33 9.7 600 60.5 34.1
-9.8786 49.6403 6.2 10.3 33 9.7 600 60.6 33.6
-9.8585 49.6403 6.2 10.3 33 9.7 600 60.5 32.8
-9.8385 49.6403 6.2 10.3 33 9.7 600 60.4 32.1
-9.8185 49.6403 6.2 10.3 33 9.6 600 60.4 31.5
-9.7984 49.6403 6.2 10.3 32.9 9.6 600 60.3 30.9
-9.7784 49.6403 6.2 10.3 32.9 9.6 625 60.3 30.4
-9.7584 49.6403 6.2 10.3 32.9 9.5 625 60.2 30
-9.7383 49.6403 6.2 10.3 32.9 9.5 625 60.2 29.7
-9.7183 49.6403 6.2 10.3 32.9 9.5 625 60.2 29.3
-9.6983 49.6403 6.2 10.3 32.9 9.4 625 60.1 29.2
-9.6782 49.6403 6.2 10.3 32.9 9.4 625 60.1 29
-9.6582 49.6403 6.2 10.3 32.9 9.4 625 60.1 29.3
-9.6382 49.6403 6.2 10.3 32.8 9.3 625 60.1 29.7
-9.6182 49.6403 6.2 10.3 32.7 9.3 625 60.1 30.1
-9.5981 49.6403 6.2 10.3 32.7 9.3 625 60.1 30.2
-9.5781 49.6403 6.2 10.3 32.7 9.4 625 60.1 30.4
-9.5581 49.6403 6.2 10.3 32.7 9.4 625 60.1 30.5
-9.538 49.6403 6.2 10.3 32.7 9.4 625 60.1 30.6
-9.518 49.6403 6.2 10.3 32.7 9.4 625 60.1 30.8
-9.498 49.6403 6.2 10.4 32.7 9.4 625 60.1 31.2
-9.4779 49.6403 6.2 10.4 32.7 9.5 625 60.1 31.9
-9.4579 49.6403 6.2 10.4 32.6 9.5 625 60.1 32.4
-9.4379 49.6403 6.2 10.4 32.6 9.5 625 60.1 32.7
-9.4178 49.6403 6.2 10.4 32.6 9.5 625 60.1 32.8
-9.3978 49.6403 6.2 10.4 32.6 9.5 625 60.1 32.9
-9.3778 49.6403 6.2 10.4 32.6 9.6 625 60.1 33.3
-9.3577 49.6403 6.2 10.4 32.5 9.6 625 60.1 33.8
-9.3377 49.6403 6.2 10.4 32.5 9.6 625 60.1 34.3
-9.3177 49.6403 6.2 10.4 32.5 9.6 625 60.1 34.6
-9.2977 49.6403 6.2 10.4 32.5 9.6 625 60.2 35
-9.2776 49.6403 6.2 10.4 32.4 9.6 625 60.2 35.1
-9.2576 49.6403 6.2 10.4 32.4 9.6 625 60.2 35.3
-9.2376 49.6403 6.2 10.4 32.4 9.6 625 60.2 35.3
-9.2175 49.6403 6.2 10.4 32.4 9.6 625 60.2 35.4
-9.1975 49.6403 6.2 10.4 32.3 9.6 625 60.2 35.6
-9.1775 49.6403 6.2 10.4 32.3 9.6 625 60.2 35.9
-9.1574 49.6403 6.2 10.4 32.3 9.6 625 60.2 36.1
-9.1374 49.6403 6.2 10.4 32.3 9.6 625 60.2 36.3
-9.1174 49.6403 6.2 10.4 32.2 9.6 625 60.2 36.7
-9.0973 49.6403 6.2 10.4 32.2 9.6 625 60.2 37.5
-9.0773 49.6403 6.2 10.4 32.2 9.6 625 60.2 38.3
-9.0573 49.6403 6.2 10.4 32.1 9.6 625 60.2 37.9
-9.0372 49.6403 6.2 10.3 32.1 9.5 625 60.1 36.6
-9.0172 49.6403 6.2 10.3 32 9.5 625 60.1 35.4
-8.9972 49.6403 6.2 10.3 32 9.5 625 60 34.7
-8.9772 49.6403 6.2 10.3 31.9 9.4 625 60 34.1
-8.9571 49.6403 6.2 10.3 31.9 9.4 625 59.9 33.6
-8.9371 49.6403 6.2 10.3 31.8 9.4 625 59.8 33.4
-8.9171 49.6403 6.2 10.3 31.8 9.4 625 59.7 33.2
-8.897 49.6403 6.2 10.3 31.8 9.4 625 59.6 33
-8.877 49.6403 6.1 10.3 31.7 9.3 625 59.4 32.9
-8.857 49.6403 6.2 10.3 31.7 9.3 625 59.2 32.7
-8.8369 49.6403 6.2 10.3 31.7 9.3 625 59 32.8
-8.8169 49.6403 6.1 10.3 31.7 9.3 625 58.7 33.6
-8.7969 49.6403 6.1 10.3 31.7 9.4 625 58.3 34.4
-8.7768 49.6403 6.1 10.3 31.7 9.5 625 58 35.4
-8.7568 49.6403 6.1 10.3 31.7 9.5 625 57.6 36.6
-8.7368 49.6403 6.1 10.3 31.8 9.6 625 57.3 37.8
-8.7167 49.6403 6.1 10.3 31.8 9.6 625 59.5 40.7
-8.6967 49.6403 6.1 10.2 31.8 9.7 625 62.6 44.4
-8.6767 49.6403 6.1 10.2 31.8 9.8 600 63.1 47.1
-8.6567 49.6403 6.1 10.2 31.8 9.8 600 62.5 50
-8.6366 49.6403 6.1 10.2 31.9 9.9 600 63.5 53.8
-8.6166 49.6403 6.1 10.2 31.9 10 600 64.4 58
-8.5966 49.6403 6.1 10.2 31.9 10 600 64.8 62.9
-8.5765 49.6403 6.1 10.2 31.9 10.1 600 64.6 67.6
-8.5565 49.6403 6.1 10.2 31.9 10.2 600 64.4 70.4
-8.5365 49.6403 6.1 10.2 31.9 10.2 600 64.3 71
-8.5164 49.6403 6.1 10.2 31.9 10.1 600 64.3 72.1
-8.4964 49.6403 6.1 10.2 31.8 10.1 600 64.3 71.9
-8.4764 49.6403 6.1 10.2 31.7 10.1 600 64.3 69.3
-8.4563 49.6403 6.1 10.2 31.7 10 600 64.3 67.1
-8.4363 49.6403 6.1 10.2 31.6 10 600 64.6 65.7
-8.4163 49.6403 6.1 10.2 31.5 9.9 600 65.1 64
-8.3962 49.6403 6.1 10.2 31.4 9.9 600 65.5 61.5
-8.3762 49.6403 6.1 10.2 31.3 9.9 600 62.8 58.2
-8.3562 49.6403 6.1 10.2 31.3 9.8 600 59.9 55
-8.3362 49.6403 6.1 10.2 31.2 9.8 600 58.1 52.6
-8.3161 49.6403 6.1 10.2 31.2 9.8 600 58.2 51.4
-8.2961 49.6403 6.1 10.2 31.1 9.7 600 58.8 50.5
-8.2761 49.6403 6.1 10.2 31 9.7 600 59.1 49.6
-8.256 49.6403 6.1 10.2 31 9.6 600 59.3 48.9
-8.236 49.6403 6.1 10.2 30.9 9.6 600 59.6 48.1
-8.216 49.6403 6.1 10.2 30.8 9.6 600 59.7 47
-8.1959 49.6403 6.1 10.1 30.8 9.5 600 59.7 45.6
-8.1759 49.6403 6.1 10.2 30.7 9.5 600 59.8 44.4
-8.1559 49.6403 6.1 10.1 30.7 9.4 600 59.9 43.7
-8.1358 49.6403 6.1 10.1 30.6 9.4 600 59.7 43.2
-8.1158 49.6403 6.1 10.1 30.5 9.3 600 59.2 42.5
-8.0958 49.6403 6.1 10.1 30.5 9.3 600 58.6 41.8
-8.0757 49.6403 6.1 10.1 30.4 9.3 600 58.2 41.3
-8.0557 49.6403 6.1 10.1 30.3 9.2 600 58.2 40.8
-8.0357 49.6403 6.1 10.1 30.3 9.2 600 58.2 40.2
-8.0156 49.6403 6.1 10.1 30.2 9.1 600 58.2 39.8
-7.9956 49.6403 6.1 10.1 30.2 9.1 600 58.1 39.8
-7.9756 49.6403 6.1 10.1 30.1 9.1 600 58.1 40.2
-7.9556 49.6403 6.1 10.1 30.1 9.1 600 58 40.6
-7.9355 49.6403 6.1 10.1 30.1 9.1 600 58.3 40.6
-7.9155 49.6403 6.1 10.2 30 9.1 600 58.4 40.4
-7.8955 49.6403 6.1 10.2 30 9.1 600 58.1 40.1
-7.8754 49.6403 6.1 10.2 30 9.1 600 57.6 40.3
-7.8554 49.6403 6.1 10.2 29.9 9.1 614 57.8 41.4
-7.8354 49.6403 6.1 10.2 29.9 9.1 625 58.9 42.8
-7.8153 49.6403 6.1 10.2 29.9 9.1 625 61.7 44.7
-7.7953 49.6403 6.1 10.2 29.8 9.1 625 64.9 47
-7.7753 49.6403 6.1 10.2 29.8 9.1 625 66.5 48.4
-7.7552 49.6403 6.1 10.2 29.8 9.1 625 65.9 48.5
-7.7352 49.6403 6.1 10.2 29.8 9.1 625 65.4 48.5
-7.7152 49.6403 6.1 10.2 29.7 9.1 625 65 49.1
-7.6951 49.6403 6.1 10.2 29.8 9.2 625 64.7 50.4
-7.6751 49.6403 6.1 10.2 29.8 9.2 625 64.3 51.7
-7.6551 49.6403 6.1 10.2 29.8 9.2 625 64.1 52.7
-7.6351 49.6403 6.1 10.2 29.8 9.3 625 63.9 53.6
-7.615 49.6403 6.1 10.2 29.8 9.3 625 63.7 54.5
-7.595 49.6403 6.1 10.2 29.8 9.4 624 63.6 56.4
-7.575 49.6403 6.1 10.2 29.9 9.4 600 63.5 58.5
-7.5549 49.6403 6.1 10.1 29.9 9.4 600 63.4 60.5
-7.5349 49.6403 6.1 10.1 29.9 9.5 600 63.3 62.4
-7.5149 49.6403 6.1 10.1 29.9 9.5 600 63.2 64.2
-7.4948 49.6403 6.1 10.1 29.9 9.5 600 63.2 65.9
-7.4748 49.6403 6.1 10.1 30 9.6 600 63.1 67.7
-7.4548 49.6403 6.1 10.1 30 9.6 600 63 69.4
-7.4347 49.6403 6.1 10.1 30 9.7 600 63 70.3
-7.4147 49.6403 6.1 10.1 29.9 9.6 600 63 71.4
-7.3947 49.6403 6.1 10.1 29.9 9.6 600 63 72
-7.3746 49.6403 6.1 10.1 29.9 9.6 600 63 71
-7.3546 49.6403 6.1 10.1 29.8 9.5 600 63 69.5
-7.3346 49.6403 6.1 10.1 29.7 9.5 600 63 68.3
-7.3146 49.6403 6.1 10.1 29.7 9.4 600 63 68
-7.2945 49.6403 6.1 10.2 29.7 9.4 600 63 67.6
-7.2745 49.6403 6.1 10.2 29.6 9.4 600 63 67.1
-7.2545 49.6403 6.1 10.2 29.6 9.3 600 63.1 66.2
-7.2344 49.6403 6.1 10.2 29.5 9.3 600 63.1 65.2
-7.2144 49.6403 6.1 10.2 29.5 9.3 600 63.2 63.7
-7.1944 49.6403 6.1 10.2 29.5 9.2 600 63.2 61.9
-7.1743 49.6403 6 10.2 29.4 9.2 600 63.2 60.2
-7.1543 49.6403 6.1 10.2 29.4 9.1 600 63.3 57.7
-7.1343 49.6403 6.1 10.2 29.3 9 600 63.4 55.7
-7.1142 49.6403 6.1 10.2 29.2 8.9 600 63.4 53.6
-7.0942 49.6403 6.1 10.2 29.1 8.8 600 63.5 50.5
-7.0742 49.6403 6.1 10.3 29 8.7 600 63.5 47.1
-7.0541 49.6403 6.1 10.3 28.9 8.5 600 63.6 44
-7.0341 49.6403 6.1 10.3 28.8 8.4 605 63.6 41.3
-7.0141 49.6403 6.1 10.3 28.7 8.3 650 63.7 38.7
-6.9941 49.6403 6.1 10.3 28.6 8.2 650 63.7 36.6
-6.974 49.6403 6.1 10.3 28.5 8.1 650 63.8 34.9
-6.954 49.6403 6.1 10.3 28.4 7.9 650 63.8 33.4
-6.934 49.6403 6.1 10.4 28.3 7.8 650 63.8 32.2
-6.9139 49.6403 6.1 10.4 28.2 7.7 650 63.9 31.2
-6.8939 49.6403 6.1 10.4 28.1 7.6 650 63.9 30.3
-6.8739 49.6403 6.1 10.4 28.1 7.6 650 63.9 30.1
-6.8538 49.6403 6.1 10.4 28.2 7.7 650 63.9 30.3
-6.8338 49.6403 6.1 10.4 28.3 7.7 650 63.9 30.5
-6.8138 49.6403 6.1 10.4 28.4 7.8 650 63.9 30.8
-6.7937 49.6403 6.1 10.3 28.6 7.9 650 63.9 30.9
-6.7737 49.6403 6.1 10.3 28.7 8 650 63.9 31.3
-6.7537 49.6403 6.1 10.3 28.8 8 635 64 32.3
-6.7336 49.6403 6.1 10.3 28.9 8.1 625 64 33.2
-6.7136 49.6403 6.1 10.3 29 8.1 625 64 33.9
-6.6936 49.6403 6.1 10.3 29.1 8.2 625 64 34.5
-6.6736 49.6403 6.1 10.3 29.2 8.2 625 64 34.9
-6.6535 49.6403 6.1 10.3 29.3 8.3 625 64 35.2
-6.6335 49.6403 6.1 10.3 29.4 8.4 625 64 35
-6.6135 49.6403 6.1 10.3 29.4 8.3 625 64.1 34.9
-6.5934 49.6403 6.1 10.3 29.3 8.3 625 64.1 34.7
-6.5734 49.6403 6.1 10.3 29.3 8.2 625 64.1 34.6
-6.5534 49.6403 6.1 10.3 29.3 8.2 625 64.2 34
-6.5333 49.6403 6.1 10.3 29.3 8.1 625 64.3 32.8
-6.5133 49.6403 6.1 10.3 29.3 8.1 625 64.3 31.5
-6.4933 49.6403 6.1 10.3 29.3 8 625 64.4 30.6
-6.4732 49.6403 6.1 10.3 29.3 8 625 64.4 29.9
-6.4532 49.6403 6.1 10.3 29.3 7.9 625 64.5 29.3
-6.4332 49.6403 6.1 10.3 29.3 7.9 625 64.6 28.6
-6.4131 49.6403 6.1 10.3 29.3 7.9 625 64.8 28
-6.3931 49.6403 6.1 10.3 29.3 7.8 625 64.9 27.3
-6.3731 49.6403 6.1 10.3 29.3 7.8 625 65.1 26.7
-6.3531 49.6403 6.1 10.3 29.3 7.7 625 65.2 26.3
-6.333 49.6403 6.1 10.3 29.2 7.6 625 65.4 25.8
-6.313 49.6403 6.1 10.3 29.1 7.5 625 65.7 25.6
-6.293 49.6403 6.1 10.3 29 7.4 625 65.8 25.5
-6.2729 49.6403 6.1 10.4 28.9 7.3 625 65.3 24.8
-6.2529 49.6403 6.1 10.4 28.8 7.2 625 65.7 23.8
-6.2329 49.6403 6.1 10.4 28.7 7.1 625 66.2 22.8
-6.2128 49.6403 6.1 10.4 28.6 7 625 66.4 22.2
-6.1928 49.6403 6.1 10.4 28.5 6.9 641 66.7 21.7
-6.1728 49.6403 6.1 10.4 28.5 6.8 650 67 21.1
-6.1527 49.6403 6.1 10.4 28.4 6.7 650 67.3 20.7
-6.1327 49.6403 6.1 10.4 28.3 6.7 650 67.8 20.4
-6.1127 49.6403 6.1 10.4 28.2 6.6 650 67.7 20
-6.0926 49.6403 6.1 10.4 28.2 6.5 650 64.8 19.1
-6.0726 49.6403 6.1 10.4 28.1 6.5 650 61.3 18.1
-6.0526 49.6403 6.1 10.4 28.1 6.4 650 60 17.7
-6.0326 49.6403 6.1 10.4 28.1 6.5 650 60.4 17.8
-6.0125 49.6403 6.1 10.4 28.1 6.5 650 60.9 18
-5.9925 49.6403 6.1 10.4 28.1 6.5 650 61.3 18.1
-5.9725 49.6403 6.1 10.4 28.1 6.6 650 61.8 18.1
-5.9524 49.6403 6.1 10.4 28.1 6.6 650 60.8 17.9
-5.9324 49.6403 6.1 10.4 28.1 6.6 643 61 18.1
-5.9124 49.6403 6.1 10.4 28.1 6.6 600 61.1 18.3
-5.8923 49.6403 6.1 10.4 28.1 6.7 600 61.2 18.5
-5.8723 49.6403 6.1 10.4 28.2 6.7 600 61.4 19.1
-5.8523 49.6403 6.1 10.4 28.2 6.7 600 61.4 19.7
-5.8322 49.6403 6.1 10.4 28.2 6.7 600 61.6 19.9
-5.8122 49.6403 6.1 10.3 28.2 6.8 600 61.7 19.6
-5.7922 49.6403 6.1 10.3 28.2 6.8 600 61.8 19.2
-5.7721 49.6403 6.1 10.3 28.3 6.8 600 61.9 19.2
-5.7521 49.6403 6.1 10.3 28.2 6.8 600 62 19.3
-5.7321 49.6403 6.1 10.3 28.1 6.9 600 62.2 19.5
-5.7121 49.6403 6.1 10.3 28.1 6.9 600 62.4 19.6
-5.692 49.6403 6.1 10.3 28.1 6.9 600 62.5 19.6
-5.672 49.6403 6.1 10.3 28 6.9 600 62.6 19.6
-5.652 49.6403 6.1 10.3 28 6.9 600 62.3 19.6
-5.6319 49.6403 6.1 10.3 27.9 6.9 583 61.8 19.7
-5.6119 49.6403 6.1 10.3 27.9 6.9 575 61.8 19.7
-5.5919 49.6403 6.1 10.3 27.9 6.9 575 61.9 19.8
-5.5718 49.6403 6.1 10.3 27.8 6.9 575 62.1 20.1
-5.5518 49.6403 6.1 10.3 27.8 6.9 575 62.3 20.2
-5.5318 49.6403 6.1 10.3 27.7 6.9 575 62.3 20.3
-5.5117 49.6403 6.1 10.3 27.7 6.9 575 62.1 20.4
-5.4917 49.6403 6.1 10.3 27.6 6.8 575 61.8 20.4
-5.4717 49.6403 6.1 10.3 27.6 6.8 575 61.6 20.5
-5.4516 49.6403 6.1 10.3 27.6 6.8 575 61.6 20.6
-5.4316 49.6403 6.1 10.3 27.5 6.8 575 61.7 20.6
-5.4116 49.6403 6.1 10.3 27.5 6.7 575 61.6 20.5
-5.3915 49.6403 6.1 10.3 27.4 6.7 575 61.5 20.3
-5.3715 49.6403 6.1 10.3 27.4 6.7 570 61.5 20
-5.3515 49.6403 6.1 10.3 27.4 6.7 550 61.7 19.8
-5.3315 49.6403 6.1 10.3 27.3 6.7 550 61.7 19.7
-5.3114 49.6403 6.1 10.4 27.3 6.6 550 61.6 19.6
-5.2914 49.6403 6.1 10.4 27.3 6.6 550 61.6 19.5
-5.2714 49.6403 6.1 10.4 27.2 6.6 550 61.7 19.4
-5.2513 49.6403 6.1 10.3 27.2 6.6 550 61.7 19.4
-5.2313 49.6403 6.1 10.3 27.2 6.6 550 61.8 19.4
-5.2113 49.6403 6.1 10.3 27.1 6.6 550 62 19.6
-5.1912 49.6403 6.1 10.3 27 6.6 550 62.1 19.8
-5.1712 49.6403 6.1 10.3 26.9 6.5 550 62.2 19.9
-5.1512 49.6403 6.1 10.3 26.9 6.5 550 62.5 19.3
-5.1311 49.6403 6.1 10.3 26.8 6.5 550 62.7 19
-5.1111 49.6403 6.1 10.3 26.7 6.4 550 62.8 18.7
-5.0911 49.6403 6.2 10.3 26.7 6.4 532 62.9 18.6
-5.071 49.6403 6.2 10.3 26.6 6.4 525 63 18.5
-5.051 49.6403 6.2 10.3 26.5 6.3 525 63 18.4
-5.031 49.6403 6.2 10.3 26.5 6.3 525 63.2 18.3
-5.011 49.6403 6.2 10.3 26.4 6.2 525 63.3 18.2
-4.9909 49.6403 6.2 10.3 26.3 6.2 525 63.6 18.1
-4.9709 49.6403 6.2 10.3 26.2 6.1 525 64 18.1
-4.9509 49.6403 6.2 10.3 26.2 6.1 525 64.5 18.1
-4.9308 49.6403 6.2 10.3 26.1 6 525 64.7 18.3
-4.9108 49.6403 6.2 10.3 26 6 525 64.8 18.2
-4.8908 49.6403 6.2 10.3 25.9 5.9 525 65 18
-4.8707 49.6403 6.2 10.3 25.8 5.9 525 65.1 17.6
-4.8507 49.6403 6.2 10.3 25.7 5.8 525 65.1 17.4
-4.8307 49.6403 6.2 10.3 25.6 5.8 525 65.2 17.3
-4.8106 49.6403 6.2 10.3 25.5 5.7 525 65.3 17.1
-4.7906 49.6403 6.2 10.3 25.4 5.7 525 65.4 17
-4.7706 49.6403 6.2 10.3 25.3 5.6 525 65.4 17
-4.7505 49.6403 6.2 10.3 25.3 5.6 525 65.5 16.9
-4.7305 49.6403 6.2 10.3 25.2 5.6 525 65.5 16.8
-4.7105 49.6403 6.2 10.3 25.2 5.6 525 65.6 16.8
-4.6905 49.6403 6.2 10.3 25.1 5.6 525 65.6 16.8
-4.6704 49.6403 6.2 10.3 25 5.5 525 65.7 16.8
-4.6504 49.6403 6.2 10.3 24.9 5.5 525 65.8 16.8
-4.6304 49.6403 6.2 10.3 24.8 5.5 525 65.8 16.9
-4.6103 49.6403 6.2 10.3 24.8 5.5 525 65.9 16.9
-4.5903 49.6403 6.2 10.3 24.7 5.5 525 65.6 16.9
-4.5703 49.6403 6.2 10.3 24.6 5.5 525 65.3 16.8
-4.5502 49.6403 6.2 10.3 24.5 5.5 525 65.2 16.8
-4.5302 49.6403 6.2 10.3 24.5 5.5 506 65.2 16.9
-4.5102 49.6403 6.2 10.3 24.4 5.5 500 65.2 16.9
-4.4901 49.6403 6.2 10.3 24.3 5.5 500 65.3 17
-4.4701 49.6403 6.2 10.3 24.3 5.4 500 65.4 17.1
-4.4501 49.6403 6.2 10.3 24.2 5.4 500 65.4 17.2
-4.43 49.6403 6.2 10.3 24.2 5.4 500 65.5 17.3
-4.41 49.6403 6.2 10.3 24.2 5.4 500 65.6 17.5
-4.39 49.6403 6.2 10.3 24.1 5.4 500 65.7 17.6
-4.37 49.6403 6.2 10.3 24.1 5.4 500 65.7 17.8
-4.3499 49.6403 6.2 10.2 24 5.4 500 65.8 17.9
-4.3299 49.6403 6.2 10.2 24 5.4 500 65.9 18.2
-4.3099 49.6403 6.2 10.2 24 5.5 500 66 18.4
-4.2898 49.6403 6.3 10.2 23.9 5.5 500 66 18.6
-4.2698 49.6403 6.3 10.2 23.9 5.5 489 66 18.8
-4.2498 49.6403 6.3 10.2 23.8 5.5 450 66.1 19
-4.2297 49.6403 6.3 10.2 23.8 5.5 450 66.1 19.2
-4.2097 49.6403 6.3 10.2 23.8 5.5 450 66.2 19.5
-4.1897 49.6403 6.3 10.2 23.7 5.5 450 66.2 19.8
-4.1696 49.6403 6.3 10.2 23.6 5.5 450 66.3 20.1
-4.1496 49.6403 6.3 10.2 23.6 5.5 450 66.3 20.6
-4.1296 49.6403 6.3 10.2 23.5 5.6 450 66.4 20.9
-4.1095 49.6403 6.3 10.2 23.4 5.6 450 66.5 21.4
-4.0895 49.6403 6.3 10.1 23.5 5.6 450 66.8 21.8
-4.0695 49.6403 6.3 10.1 23.5 5.5 450 67 22.3
-4.0495 49.6403 6.3 10.1 23.5 5.5 450 67.1 22.7
-4.0294 49.6403 6.3 10 23.6 5.5 450 67.1 23
-4.0094 49.6403 6.3 10 23.6 5.5 450 67.5 23.4
-3.9894 49.6403 6.3 10 23.6 5.5 376 67.7 23.7
-3.9693 49.6403 6.3 10 23.6 5.5 350 67.7 23.8
-3.9493 49.6403 6.3 9.9 23.6 5.6 350 67.7 24.1
-3.9293 49.6403 6.3 9.9 23.6 5.6 350 67.7 24.2
-3.9092 49.6403 6.4 9.9 23.6 5.6 350 67.8 24.2
-3.8892 49.6403 6.4 9.9 23.5 5.7 350 67.8 24.2
-3.8692 49.6403 6.4 9.9 23.5 5.7 350 67.8 24.2
-3.8491 49.6403 6.4 9.9 23.5 5.8 350 67.8 24.2
-3.8291 49.6403 6.4 9.9 23.5 5.8 350 67.8 24.1
-3.8091 49.6403 6.4 9.8 23.5 5.8 350 67.8 24.2
-3.789 49.6403 6.4 9.8 23.5 5.8 350 67.8 24.2
-3.769 49.6403 6.4 9.8 23.4 5.8 350 67.8 24.4
-3.749 49.6403 6.4 9.8 23.4 5.8 350 67.8 24.5
-3.729 49.6403 6.4 9.8 23.4 5.8 361 67.8 24.6
-3.7089 49.6403 6.4 9.7 23.4 5.8 367 67.8 24.7
-3.6889 49.6403 6.4 9.7 23.4 5.8 275 67.9 24.7
-3.6689 49.6403 6.4 9.8 23.3 5.8 275 67.9 24.8
-3.6488 49.6403 6.4 9.8 23.2 5.7 275 67.9 24.8
-3.6288 49.6403 6.4 9.8 23.1 5.7 275 67.9 24.8
-3.6088 49.6403 6.4 9.8 23 5.7 275 67.9 24.7
-3.5887 49.6403 6.4 9.9 22.9 5.6 275 68 24.6
-3.5687 49.6403 6.4 9.9 22.8 5.6 275 68 24.4
-3.5487 49.6403 6.4 9.9 22.7 5.6 401 68 24.2
-3.5286 49.6403 6.4 9.9 22.6 5.5 493 68 24.1
-3.5086 49.6403 6.4 9.9 22.6 5.5 493 68 24
-3.4886 49.6403 6.4 9.9 22.5 5.5 493 68 23.7
-3.4685 49.6403 6.4 9.9 22.5 5.5 493 68 23.4
-3.4485 49.6403 6.4 9.9 22.4 5.5 500 68 23
-3.4285 49.6403 6.4 9.9 22.3 5.5 500 68.4 22.8
-3.4085 49.6403 6.4 9.9 22.3 5.4 308 69.2 22.8
-3.3884 49.6403 6.5 9.9 22.3 5.4 358 69.8 22.7
-3.3684 49.6403 6.5 9.8 22.3 5.4 372 70 22.7
-3.3484 49.6403 6.5 9.8 22.2 5.3 372 70 22.6
-3.3283 49.6403 6.5 9.8 22.2 5.3 372 69.9 22.6
-3.3083 49.6403 6.5 9.7 22.2 5.3 372 69.8 22.6
-3.2883 49.6403 6.5 9.7 22.1 5.2 375 69.8 22.6
-3.2682 49.6403 6.5 9.8 22 5.2 375 69.7 22.6
-3.2482 49.6403 6.5 9.8 21.9 5.1 375 69.4 22.8
-3.2282 49.6403 6.5 9.8 21.7 5.1 375 69.2 22.8
-3.2081 49.6403 6.5 9.8 21.6 5.1 375 68.7 23
-3.1881 49.6403 6.5 9.9 21.5 5 375 68.1 23
-3.1681 49.6403 6.5 9.9 21.4 5 375 67.9 23.1
-3.148 49.6403 6.5 9.8 21.4 5 352 70.1 24
-3.128 49.6403 6.5 9.8 21.4 5.1 300 73.6 25.2
-3.108 49.6403 6.5 9.8 21.4 5.1 300 77.1 26.6
-3.0879 49.6403 6.5 9.8 21.5 5.1 300 76.8 27.1
-3.0679 49.6403 6.5 9.7 21.5 5.2 300 76.2 27.5
-3.0479 49.6403 6.5 9.7 21.5 5.2 300 75.5 27.9
-3.0279 49.6403 6.5 9.7 21.6 5.3 300 75.3 28.3
-3.0078 49.6403 6.5 9.7 21.6 5.4 300 75.1 28.6
-2.9878 49.6403 6.5 9.6 21.6 5.4 300 74.9 28.8
-2.9678 49.6403 6.5 9.6 21.7 5.5 300 74.8 29
-2.9477 49.6403 6.5 9.6 21.7 5.5 300 74.7 29
-2.9277 49.6403 6.5 9.6 21.7 5.6 300 74.7 29.3
-2.9077 49.6403 6.5 9.6 21.7 5.6 300 74.6 29.2
-2.8876 49.6403 6.5 9.6 21.6 5.6 300 74.6 29.1
-2.8676 49.6403 6.5 9.6 21.6 5.5 300 74.7 29.2
-2.8476 49.6403 6.5 9.6 21.5 5.5 300 74.7 29.4
-2.8275 49.6403 6.5 9.6 21.5 5.5 300 74.7 29.6
-2.8075 49.6403 6.5 9.6 21.4 5.5 300 74.8 29.8
-2.7875 49.6403 6.5 9.6 21.4 5.4 300 74.9 30.1
-2.7674 49.6403 6.5 9.6 21.3 5.4 300 75 30.4
-2.7474 49.6403 6.5 9.6 21.3 5.4 300 75.1 30.6
-2.7274 49.6403 6.5 9.6 21.2 5.4 300 75.2 30.9
-2.7074 49.6403 6.5 9.6 21.2 5.4 300 75.3 31.3
-2.6873 49.6403 6.5 9.6 21.2 5.4 300 75.6 31.8
-2.6673 49.6403 6.5 9.6 21.3 5.4 300 75.7 32.3
-2.6473 49.6403 6.5 9.6 21.3 5.4 300 76 31.9
-2.6272 49.6403 6.5 9.6 21.3 5.4 300 76.3 31.2
-2.6072 49.6403 6.5 9.6 21.3 5.4 300 76.6 30.6
-2.5872 49.6403 6.5 9.6 21.3 5.4 300 77.2 30.6
-2.5671 49.6403 6.5 9.6 21.3 5.4 300 77.8 30.7
-2.5471 49.6403 6.5 9.6 21.3 5.4 300 78.8 31
-2.5271 49.6403 6.5 9.6 21.3 5.4 300 80 31.2
-2.507 49.6403 6.5 9.5 21.3 5.4 300 79.4 30.7
-2.487 49.6403 6.5 9.5 21.3 5.4 300 75.6 29.2
-2.467 49.6403 6.5 9.5 21.3 5.4 300 75.5 29.1
-2.4469 49.6403 6.5 9.5 21.3 5.4 300 75.5 29
-2.4269 49.6403 6.5 9.5 21.4 5.5 300 69.5 27
-2.4069 49.6403 6.5 9.5 21.4 5.5 300 61 24.1
-2.3869 49.6403 6.5 9.5 21.4 5.5 300 57.6 23.1
-2.3668 49.6403 6.5 9.5 21.4 5.5 300 66 26.1
-2.3468 49.6403 6.5 9.5 21.4 5.5 300 73.7 28.8
-2.3268 49.6403 6.5 9.5 21.4 5.5 300 72.1 28.1
-2.3067 49.6403 6.5 9.5 21.4 5.5 300 71 28
-2.2867 49.6403 6.5 9.5 21.4 5.5 300 77.7 30.6
-2.2667 49.6403 6.5 9.5 21.3 5.5 300 82.5 32.5
-2.2466 49.6403 6.5 9.5 21.3 5.5 300 75 29.8
-2.2266 49.6403 6.5 9.5 21.3 5.5 300 75.8 30.3
-2.2066 49.6403 6.5 9.5 21.3 5.5 300 77.1 30.9
-2.1865 49.6403 6.5 9.5 21.3 5.6 300 78.8 31.7
-2.1665 49.6403 6.5 9.4 21.3 5.5 300 80.7 32.7
-2.1465 49.6403 6.5 9.4 21.2 5.5 300 87.1 35.2
-2.1264 49.6403 6.5 9.4 21.2 5.5 300 80.9 33.1
-2.1064 49.6403 6.5 9.4 21.2 5.5 300 69 28.6
-2.0864 49.6403 6.5 9.4 21.2 5.5 300 64.4 27
-2.0664 49.6403 6.5 9.4 21.2 5.6 300 63.9 27
-2.0463 49.6403 6.5 9.4 21.2 5.6 300 65.9 28
-2.0263 49.6403 6.5 9.4 21.2 5.6 300 66.8 28.6
-2.0063 49.6403 6.5 9.4 21.2 5.6 300 67.2 29.2
-1.9862 49.6403 6.5 9.3 21.2 5.6 300 67.5 29.7
-1.9662 49.6403 6.5 9.3 21.2 5.7 300 67.5 29.8
-1.9462 49.6403 6.5 9.3 21.2 5.7 300 67.4 29.9
-1.9261 49.6403 6.5 9.3 21.2 5.7 300 67 30
-1.9061 49.6403 6.5 9.3 21.2 5.7 300 66.2 29.9
-1.8861 49.6403 6.5 9.3 21.2 5.8 300 66.9 30.3
-1.866 49.6403 6.5 9.3 21.2 5.8 300 69.7 31.5
-1.846 49.6403 6.5 9.3 21.2 5.7 300 73.4 33
-1.826 49.6403 6.5 9.3 21.1 5.7 300 75.1 34
-1.8059 49.6403 6.5 9.3 21.1 5.7 300 74.5 34
-1.7859 49.6403 6.5 9.3 21.1 5.7 300 74 33.8
-1.7659 49.6403 6.5 9.3 21.1 5.7 322 73.7 33.3
-1.7459 49.6403 6.5 9.3 21.1 5.7 325 73.5 33.1
-1.7258 49.6403 6.5 9.3 21.1 5.7 325 73.3 33.1
-1.7058 49.6403 6.5 9.3 21.1 5.7 325 73.3 33
-1.6858 49.6403 6.5 9.3 21 5.7 325 73.3 32.9
-1.6657 49.6403 6.5 9.2 21 5.7 325 73.5 32.7
-1.6457 49.6403 6.5 9.2 21 5.7 325 73.7 32.7
-1.6257 49.6403 6.5 9.3 21 5.7 325 72 32
-1.6056 49.6403 6.5 9.3 21 5.7 325 69.1 31
-1.5856 49.6403 6.5 9.3 21 5.7 325 67.7 30.7
-1.5656 49.6403 6.4 9.3 21 5.7 325 70.1 31.4
-1.5455 49.6403 6.4 9.3 21 5.6 325 73.9 32.5
-1.5255 49.6403 6.4 9.3 21 5.6 325 74 32.3
-1.5055 49.6403 6.4 9.4 21 5.6 325 73.9 31.6
-1.4854 49.6403 6.4 9.4 21 5.6 345 73.7 31.1
-1.4654 49.6403 6.4 9.4 21 5.6 375 73.6 30.9
-1.4454 49.6403 6.4 9.4 21 5.6 375 73.4 30.7
-1.4254 49.6403 6.4 9.4 21 5.5 375 73.3 30.5
-1.4053 49.6403 6.4 9.4 21 5.5 375 73.3 30.5
-1.3853 49.6403 6.4 9.5 21 5.5 375 73.3 30.6
-1.3653 49.6403 6.4 9.5 21 5.5 375 73.4 30.4
-1.3452 49.6403 6.4 9.5 21.1 5.5 375 73.7 30
-1.3252 49.6403 6.4 9.5 21.2 5.5 375 73.9 29.7
-1.3052 49.6403 6.4 9.6 21.3 5.5 375 73.6 29.4
-1.2851 49.6403 6.4 9.6 21.4 5.5 375 73.6 29.4
-1.2651 49.6403 6.4 9.6 21.5 5.5 375 72.5 28.9
-1.2451 49.6403 6.4 9.6 21.6 5.5 375 69.1 27.5
-1.225 49.6403 6.4 9.6 21.7 5.6 375 64.8 25.8
-1.205 49.6403 6.4 9.6 21.9 5.6 443 63.7 25.1
-1.185 49.6403 6.4 9.7 22 5.6 450 63.9 24.9
-1.1649 49.6403 6.4 9.7 22.1 5.6 450 64 24.7
-1.1449 49.6403 6.4 9.7 22.2 5.6 450 63.4 24.2
-1.1249 49.6403 6.4 9.7 22.3 5.6 450 63.1 23.8
-1.1049 49.6403 6.4 9.7 22.4 5.7 450 62.7 23.4
-1.0848 49.6403 6.4 9.7 22.5 5.7 450 62.2 23.1
-1.0648 49.6403 6.4 9.7 22.6 5.7 450 61.6 22.7
-1.0448 49.6403 6.4 9.7 22.8 5.8 450 60.4 22.2
-1.0247 49.6403 6.4 9.7 22.9 5.8 450 61 22.4
-1.0047 49.6403 6.4 9.7 23.1 5.8 450 65.4 23.8
-0.9847 49.6403 6.4 9.7 23.2 5.9 450 73.7 26.4
-0.9646 49.6403 6.4 9.7 23.3 5.9 450 74.7 26.4
-0.9446 49.6403 6.4 9.7 23.5 5.9 460 65.8 23.3
-0.9246 49.6403 6.4 9.7 23.6 6 475 60.7 21.5
-0.9045 49.6403 6.4 9.7 23.7 6 475 60.7 21.3
-0.8845 49.6403 6.4 9.7 23.9 6 475 61.3 21.4
-0.8645 49.6403 6.4 9.7 24.1 6.1 475 61.1 21.1
-0.8444 49.6403 6.4 9.7 24.2 6.1 475 60.1 20.7
-0.8244 49.6403 6.4 9.7 24.2 6.1 475 58.9 20.2
-0.8044 49.6403 6.4 9.7 24.3 6.1 475 57.5 19.6
-0.7844 49.6403 6.4 9.7 24.4 6.1 475 55.9 19.1
-0.7643 49.6403 6.4 9.7 24.5 6.1 475 56.1 19.2
-0.7443 49.6403 6.4 9.7 24.5 6.1 475 65.6 22.3
-0.7243 49.6403 6.4 9.8 24.6 6.2 475 74.9 25.3
-0.7042 49.6403 6.4 9.8 24.7 6.2 475 80.5 26.8
-0.6842 49.6403 6.4 9.8 24.8 6.2 475 81.1 26.8
-0.6642 49.6403 6.4 9.8 24.9 6.2 475 79.5 26.2
-0.6441 49.6403 6.4 9.8 24.9 6.2 523 74 24.4
-0.6241 49.6403 6.4 9.8 25 6.3 525 63.4 21.2
-0.6041 49.6403 6.4 9.8 25.1 6.3 525 56.5 19.2
-0.584 49.6403 6.4 9.8 25.2 6.3 525 58.3 19.7
-0.564 49.6403 6.4 9.8 25.3 6.4 525 60.3 20.4
-0.544 49.6403 6.4 9.8 25.4 6.4 525 61.8 20.8
-0.5239 49.6403 6.4 9.8 25.5 6.5 525 62.6 20.9
-0.5039 49.6403 6.4 9.8 25.6 6.5 525 63.1 21
-0.4839 49.6403 6.4 9.8 25.7 6.5 525 63.5 20.9
-0.4638 49.6403 6.4 9.8 25.7 6.5 525 63.9 20.9
-0.4438 49.6403 6.4 9.8 25.8 6.5 525 64 20.8
-0.4238 49.6403 6.4 9.8 25.8 6.5 525 64.2 20.6
-0.4038 49.6403 6.4 9.8 25.9 6.5 525 64.3 20.4
-0.3837 49.6403 6.4 9.8 25.9 6.5 536 64.4 20.2
-0.3637 49.6403 6.4 9.8 26 6.6 550 64.4 20
-0.3437 49.6403 6.4 9.8 26.1 6.6 550 64.5 19.9
-0.3236 49.6403 6.4 9.8 26.1 6.6 550 64.5 19.8
-0.3036 49.6403 6.4 9.8 26.2 6.6 550 64.6 19.7
-0.2836 49.6403 6.4 9.8 26.2 6.6 550 64.6 19.5
-0.2635 49.6403 6.4 9.8 26.3 6.6 550 64.6 19.4
-0.2435 49.6403 6.4 9.8 26.3 6.6 550 64.6 19.3
-0.2235 49.6403 6.4 9.8 26.4 6.6 550 64.6 19.2
-0.2034 49.6403 6.4 9.8 26.4 6.6 569 64.7 19.2
-0.1834 49.6403 6.4 9.8 26.4 6.6 574 64.7 19.2
-0.1634 49.6403 6.4 9.8 26.4 6.6 574 64.7 19.2
-0.1433 49.6403 6.4 9.8 26.4 6.6 574 64.7 19.2
-0.1233 49.6403 6.4 9.8 26.5 6.6 575 64.6 19.1
-0.1033 49.6403 6.4 9.8 26.5 6.6 575 64.6 19
-0.0833 49.6403 6.4 9.8 26.5 6.6 575 64.6 19
-0.0632 49.6403 6.4 9.8 26.6 6.6 575 64.6 19.1
-0.0432 49.6403 6.4 9.8 26.7 6.7 575 64.6 19.1
-0.0232 49.6403 6.4 9.8 26.7 6.7 575 64.6 19.2
-0.0031 49.6403 6.4 9.8 26.8 6.8 575 64.6 19.3
0.0169 49.6403 6.4 9.8 26.8 6.8 575 64.5 19.6
0.0369 49.6403 6.4 9.8 26.9 6.8 575 64.5 19.8
0.057 49.6403 6.4 9.8 26.9 6.9 575 64.5 20
0.077 49.6403 6.4 9.9 27 6.9 575 64.5 20.4
0.097 49.6403 6.4 10 27 6.9 575 64.4 21
0.1171 49.6403 6.5 10 27 6.9 575 64.4 21.6
0.1371 49.6403 6.5 10.1 27.1 7 575 64.4 21.5
0.1571 49.6403 6.5 10.1 27.1 7 575 64.3 20.9
0.1772 49.6403 6.5 10.1 27.2 7 575 64.3 20.3
0.1972 49.6403 6.5 10.1 27.2 7 575 64.3 20.3
0.2172 49.6403 6.5 10.1 27.3 7.1 575 64.2 20.3
0.2372 49.6403 6.5 10 27.3 7.1 575 64.2 20.4
0.2573 49.6403 6.5 10 27.4 7.1 575 64.2 20.4
0.2773 49.6403 6.5 10 27.4 7.1 575 64.1 20.4
0.2973 49.6403 6.5 10 27.5 7.2 575 64.1 20.5
0.3174 49.6403 6.5 10 27.5 7.2 575 64.1 20.6
0.3374 49.6403 6.5 9.9 27.5 7.2 575 64 20.8
0.3574 49.6403 6.4 9.8 27.6 7.2 575 64 20.9
0.3775 49.6403 6.4 9.8 27.6 7.2 575 64 21
0.3975 49.6403 6.4 9.7 27.6 7.2 575 64 21
0.4175 49.6403 6.4 9.7 27.7 7.2 575 63.9 21
0.4376 49.6403 6.4 9.7 27.7 7.3 575 63.9 21
0.4576 49.6403 6.4 9.7 27.7 7.3 575 63.9 21
0.4776 49.6403 6.4 9.7 27.8 7.3 575 63.9 21
0.4977 49.6403 6.4 9.7 27.8 7.3 575 63.8 21.1
0.5177 49.6403 6.4 9.7 27.8 7.4 575 63.8 21.1
0.5377 49.6403 6.4 9.7 27.9 7.4 575 63.8 21.2
0.5577 49.6403 6.4 9.7 27.9 7.4 575 63.8 21.4
0.5778 49.6403 6.4 9.7 27.9 7.4 575 63.8 21.6
0.5978 49.6403 6.4 9.6 28 7.5 575 63.8 21.8
0.6178 49.6403 6.4 9.6 28 7.5 575 63.7 22
0.6379 49.6403 6.4 9.6 28 7.5 575 63.7 22.3
0.6579 49.6403 6.4 9.6 28.1 7.5 575 63.7 22.6
0.6779 49.6403 6.4 9.6 28.1 7.6 575 63.7 23
0.698 49.6403 6.4 9.6 28.1 7.6 575 63.7 23.1
0.718 49.6403 6.4 9.6 28.2 7.6 575 63.7 23.3
0.738 49.6403 6.4 9.6 28.2 7.6 575 63.6 23.3
0.7581 49.6403 6.4 9.6 28.3 7.7 575 63.6 23.5
0.7781 49.6403 6.4 9.6 28.3 7.7 575 63.6 23.7
0.7981 49.6403 6.4 9.6 28.3 7.8 575 63.6 23.9
0.8182 49.6403 6.4 9.6 28.4 7.8 575 63.6 24
0.8382 49.6403 6.4 9.6 28.4 7.8 575 63.6 24.1
0.8582 49.6403 6.4 9.6 28.4 7.8 575 63.6 24.2
0.8782 49.6403 6.4 9.6 28.5 7.9 575 63.6 24.1
0.8983 49.6403 6.4 9.6 28.4 7.9 575 63.6 24
0.9183 49.6403 6.4 9.6 28.4 7.8 575 63.6 23.9
0.9383 49.6403 6.4 9.6 28.4 7.8 575 63.6 23.8
0.9584 49.6403 6.4 9.6 28.3 7.7 575 63.6 23.7
0.9784 49.6403 6.4 9.6 28.3 7.7 575 63.6 23.2
0.9984 49.6403 6.4 9.6 28.2 7.6 575 63.6 22.5
1.0185 49.6403 6.4 9.6 28.2 7.6 600 63.5 21.9
1.0385 49.6403 6.4 9.6 28.1 7.5 600 63.5 21.6
1.0585 49.6403 6.4 9.6 28.1 7.5 600 63.5 21.3
1.0786 49.6403 6.4 9.6 28.1 7.4 600 63.5 21.1
1.0986 49.6403 6.4 9.6 28 7.4 600 63.5 21
1.1186 49.6403 6.4 9.6 28 7.3 600 63.5 20.8
1.1387 49.6403 6.4 9.6 27.9 7.3 600 63.5 20.7
1.1587 49.6403 6.4 9.6 27.9 7.3 600 63.5 20.6
1.1787 49.6403 6.4 9.6 28 7.3 600 63.5 20.4
1.1987 49.6403 6.4 9.6 28 7.3 600 63.5 20.3
1.2188 49.6403 6.4 9.6 28 7.3 600 63.5 20.4
1.2388 49.6403 6.4 9.6 28 7.3 600 63.5 20.4
1.2588 49.6403 6.5 9.6 28 7.3 600 63.4 20.3
1.2789 49.6403 6.5 9.6 28 7.3 600 63.4 20.2
1.2989 49.6403 6.4 9.6 28.1 7.4 600 63.4 20.1
1.3189 49.6403 6.5 9.6 28.1 7.4 600 63.4 20.2
1.339 49.6403 6.4 9.6 28.1 7.4 600 63.4 20.1
1.359 49.6403 6.5 9.6 28.1 7.4 600 63.4 20.1
1.379 49.6403 6.5 9.6 28.2 7.4 600 63.4 20.2
1.3991 49.6403 6.5 9.5 28.1 7.4 600 63.4 20.2
1.4191 49.6403 6.5 9.5 28.1 7.4 600 63.4 20.3
1.4391 49.6403 6.5 9.5 28.1 7.4 600 63.4 20.3
1.4592 49.6403 6.5 9.5 28.2 7.4 600 63.4 20.4
1.4792 49.6403 6.5 9.5 28.2 7.4 600 63.4 20.6
1.4992 49.6403 6.5 9.5 28.2 7.4 600 63.4 20.8
1.5192 49.6403 6.5 9.5 28.2 7.5 600 63.3 21
1.5393 49.6403 6.5 9.5 28.3 7.5 600 63.3 21
1.5593 49.6403 6.5 9.5 28.3 7.5 600 63.3 21
1.5793 49.6403 6.5 9.5 28.3 7.5 600 63.3 21.1
1.5994 49.6403 6.5 9.5 28.3 7.5 600 63.3 21.3
1.6194 49.6403 6.5 9.5 28.4 7.5 600 63.3 21.4
1.6394 49.6403 6.5 9.5 28.4 7.5 600 63.3 21.6
1.6595 49.6403 6.5 9.5 28.4 7.6 600 63.3 21.6
1.6795 49.6403 6.5 9.5 28.4 7.6 600 63.2 21.7
1.6995 49.6403 6.5 9.5 28.4 7.6 600 63.2 22
1.7196 49.6403 6.5 9.5 28.5 7.7 600 63.2 22.3
1.7396 49.6403 6.5 9.4 28.5 7.8 600 63.2 22.6
1.7596 49.6403 6.5 9.4 28.6 7.8 600 63.1 23.1
1.7797 49.6403 6.5 9.4 28.6 7.9 600 63.1 23.7
1.7997 49.6403 6.5 9.4 28.7 8 600 63.1 24.3
1.8197 49.6403 6.5 9.4 28.8 8.1 600 63 24.8
1.8397 49.6403 6.5 9.3 28.9 8.2 558 63 25.4
1.8598 49.6403 6.5 9.3 28.9 8.3 525 63 26
1.8798 49.6403 6.5 9.3 29 8.3 525 62.9 26.9
1.8998 49.6403 6.5 9.4 29 8.4 525 62.9 27.6
1.9199 49.6403 6.6 9.4 29.1 8.4 525 62.9 28.2
1.9399 49.6403 6.6 9.5 29.1 8.4 525 62.8 28.7
1.9599 49.6403 6.6 9.6 29.2 8.5 525 62.8 29.4
1.98 49.6403 6.6 9.6 29.2 8.5 525 62.7 30.5
2 49.6403 6.6 9.6 29.4 8.6 525 62.7 32.1
-10.8 49.6603 6.3 10.1 31 8.2 550 58.7 22.2
-10.78 49.6603 6.3 10.1 31 8.2 550 58.8 22.6
-10.7599 49.6603 6.3 10.2 31 8.2 550 58.8 23
-10.7399 49.6603 6.3 10.2 31 8.2 550 58.8 23.5
-10.7199 49.6603 6.3 10.2 31 8.1 550 58.8 23.9
-10.6998 49.6603 6.3 10.2 30.9 8.1 550 58.8 24.4
-10.6798 49.6603 6.3 10.2 30.9 8.1 550 58.7 25
-10.6598 49.6603 6.3 10.2 31 8.2 550 58.7 25.6
-10.6397 49.6603 6.3 10.2 31.1 8.3 550 58.7 26.4
-10.6197 49.6603 6.3 10.2 31.2 8.4 550 58.6 27.2
-10.5997 49.6603 6.3 10.2 31.3 8.5 550 58.6 28.1
-10.5797 49.6603 6.3 10.1 31.5 8.6 550 58.5 29.1
-10.5596 49.6603 6.3 10.1 31.6 8.7 550 58.5 29.6
-10.5396 49.6603 6.3 10.1 31.7 8.8 550 58.4 29.4
-10.5196 49.6603 6.3 10.1 31.9 8.9 550 58.4 29.3
-10.4995 49.6603 6.3 10.1 32 9 550 58.4 29.7
-10.4795 49.6603 6.3 10.1 32.1 9.1 550 58.4 30.3
-10.4595 49.6603 6.3 10.1 32.1 9.2 550 58.4 31
-10.4394 49.6603 6.3 10.1 32.2 9.2 550 58.4 31.6
-10.4194 49.6603 6.3 10.1 32.3 9.3 550 58.4 32.2
-10.3994 49.6603 6.3 10.1 32.4 9.4 550 58.4 32.9
-10.3793 49.6603 6.3 10.1 32.4 9.4 550 58.4 33.8
-10.3593 49.6603 6.3 10.1 32.5 9.5 550 58.4 34.8
-10.3393 49.6603 6.3 10.1 32.5 9.5 574 58.4 35.5
-10.3192 49.6603 6.3 10.1 32.6 9.6 575 58.4 36.2
-10.2992 49.6603 6.3 10.1 32.6 9.7 575 58.3 36.9
-10.2792 49.6603 6.3 10.2 32.7 9.7 575 58.3 37.9
-10.2592 49.6603 6.3 10.2 32.7 9.8 575 58.3 39.1
-10.2391 49.6603 6.3 10.2 32.8 9.8 575 58.3 40.1
-10.2191 49.6603 6.3 10.2 32.8 9.9 575 58.2 41
-10.1991 49.6603 6.3 10.2 32.9 9.9 575 58.2 41.7
-10.179 49.6603 6.3 10.2 32.9 9.9 575 58.2 41.9
-10.159 49.6603 6.3 10.2 32.9 10 575 58.2 41
-10.139 49.6603 6.3 10.2 33 10 575 58.2 39.5
-10.1189 49.6603 6.3 10.2 33 10 575 58.2 38.5
-10.0989 49.6603 6.2 10.2 33 10 575 58.6 37.9
-10.0789 49.6603 6.2 10.2 33 9.9 586 59 37.2
-10.0588 49.6603 6.2 10.2 33 9.9 600 59.2 36.5
-10.0388 49.6603 6.2 10.2 33.1 9.9 600 59.1 36.1
-10.0188 49.6603 6.2 10.2 33.1 9.9 600 59.1 35.5
-9.9987 49.6603 6.2 10.2 33.1 9.9 600 59.1 35.4
-9.9787 49.6603 6.2 10.2 33.1 9.9 600 58.9 35.4
-9.9587 49.6603 6.2 10.3 33.1 9.8 600 58.9 35.3
-9.9387 49.6603 6.2 10.3 33.1 9.8 600 59.4 35.3
-9.9186 49.6603 6.2 10.3 33.1 9.8 600 60 35.4
-9.8986 49.6603 6.2 10.3 33.1 9.8 600 60.5 35.2
-9.8786 49.6603 6.2 10.3 33.2 9.8 600 60.5 34.7
-9.8585 49.6603 6.2 10.3 33.1 9.8 600 60.4 34
-9.8385 49.6603 6.2 10.3 33.1 9.8 600 60.3 33.3
-9.8185 49.6603 6.2 10.3 33.1 9.7 600 60.3 32.7
-9.7984 49.6603 6.2 10.3 33.1 9.7 600 60.2 32.2
-9.7784 49.6603 6.2 10.3 33.1 9.7 625 60.2 31.6
-9.7584 49.6603 6.2 10.3 33.1 9.6 625 60.1 31.1
-9.7383 49.6603 6.2 10.3 33.1 9.6 625 60.1 30.7
-9.7183 49.6603 6.2 10.3 33.1 9.6 625 60.1 30.6
-9.6983 49.6603 6.2 10.3 33 9.6 625 60 30.6
-9.6782 49.6603 6.2 10.3 33 9.5 625 60 30.5
-9.6582 49.6603 6.2 10.3 33 9.5 625 60 30.5
-9.6382 49.6603 6.2 10.3 32.9 9.4 625 60 30.7
-9.6182 49.6603 6.2 10.3 32.9 9.4 625 60 31
-9.5981 49.6603 6.2 10.4 32.8 9.4 625 59.9 31
-9.5781 49.6603 6.2 10.4 32.8 9.4 625 59.9 31.1
-9.5581 49.6603 6.2 10.4 32.8 9.4 625 59.9 31.4
-9.538 49.6603 6.2 10.4 32.8 9.4 625 59.9 31.7
-9.518 49.6603 6.2 10.4 32.8 9.4 625 59.9 31.9
-9.498 49.6603 6.2 10.4 32.7 9.5 625 59.9 32.2
-9.4779 49.6603 6.2 10.4 32.7 9.5 625 59.9 32.7
-9.4579 49.6603 6.2 10.4 32.7 9.5 625 59.9 33.2
-9.4379 49.6603 6.2 10.4 32.7 9.5 625 59.9 33
-9.4178 49.6603 6.2 10.4 32.7 9.5 625 59.9 32.8
-9.3978 49.6603 6.2 10.4 32.7 9.6 625 59.9 33
-9.3778 49.6603 6.2 10.4 32.6 9.6 625 59.9 33.5
-9.3577 49.6603 6.2 10.4 32.6 9.6 625 59.9 33.9
-9.3377 49.6603 6.2 10.4 32.6 9.6 625 59.9 34.2
-9.3177 49.6603 6.2 10.4 32.5 9.6 625 60 34.3
-9.2977 49.6603 6.2 10.4 32.5 9.6 625 60 34.5
-9.2776 49.6603 6.2 10.4 32.5 9.6 625 60 34.8
-9.2576 49.6603 6.2 10.4 32.4 9.6 625 60.1 34.7
-9.2376 49.6603 6.2 10.4 32.4 9.6 625 60.1 34.8
-9.2175 49.6603 6.2 10.4 32.4 9.6 625 60.1 35.2
-9.1975 49.6603 6.2 10.4 32.4 9.6 625 60.1 35.5
-9.1775 49.6603 6.2 10.4 32.3 9.6 625 60.1 35.8
-9.1574 49.6603 6.2 10.4 32.3 9.6 625 60.1 36.2
-9.1374 49.6603 6.2 10.4 32.3 9.6 625 60.1 36.6
-9.1174 49.6603 6.2 10.4 32.3 9.6 625 60.1 36.8
-9.0973 49.6603 6.2 10.4 32.2 9.6 625 60.1 37.4
-9.0773 49.6603 6.2 10.4 32.2 9.6 625 60 38.1
-9.0573 49.6603 6.2 10.4 32.1 9.6 625 60 38.3
-9.0372 49.6603 6.2 10.4 32.1 9.6 625 60 37.3
-9.0172 49.6603 6.2 10.4 32.1 9.6 625 59.9 36
-8.9972 49.6603 6.2 10.4 32 9.5 625 59.9 35.2
-8.9772 49.6603 6.2 10.3 32 9.5 625 59.8 34.6
-8.9571 49.6603 6.2 10.3 31.9 9.5 625 59.7 34.1
-8.9371 49.6603 6.2 10.3 31.9 9.4 625 59.5 33.9
-8.9171 49.6603 6.2 10.3 31.8 9.4 625 59.4 33.8
-8.897 49.6603 6.2 10.3 31.8 9.4 625 59.2 33.7
-8.877 49.6603 6.1 10.3 31.8 9.4 625 58.8 33.7
-8.857 49.6603 6.2 10.3 31.7 9.4 625 58.6 33.6
-8.8369 49.6603 6.2 10.3 31.7 9.3 625 59.2 34
-8.8169 49.6603 6.2 10.3 31.7 9.4 625 60.5 35.3
-8.7969 49.6603 6.1 10.3 31.8 9.4 625 60.1 36.2
-8.7768 49.6603 6.1 10.3 31.8 9.5 625 59.7 37
-8.7568 49.6603 6.1 10.3 31.8 9.5 625 59.2 38.1
-8.7368 49.6603 6.1 10.3 31.9 9.6 625 58.7 39.3
-8.7167 49.6603 6.1 10.3 31.9 9.7 625 58.9 41.6
-8.6967 49.6603 6.1 10.2 31.9 9.7 625 61.7 45.2
-8.6767 49.6603 6.1 10.2 31.9 9.8 600 64.5 49
-8.6567 49.6603 6.1 10.2 31.9 9.9 600 65 52.4
-8.6366 49.6603 6.1 10.2 31.9 9.9 600 64.5 55.7
-8.6166 49.6603 6.1 10.2 32 10 600 64.1 59.3
-8.5966 49.6603 6.1 10.2 32 10.1 600 63.9 63.7
-8.5765 49.6603 6.1 10.2 32 10.1 600 63.7 68.5
-8.5565 49.6603 6.1 10.2 32 10.2 600 63.6 72.2
-8.5365 49.6603 6.1 10.2 32 10.2 600 63.6 72.9
-8.5164 49.6603 6.1 10.2 32 10.2 600 63.6 73.1
-8.4964 49.6603 6.1 10.2 31.9 10.1 600 63.6 72
-8.4764 49.6603 6.1 10.2 31.8 10.1 600 63.7 69.1
-8.4563 49.6603 6.1 10.2 31.8 10.1 600 63.8 65.9
-8.4363 49.6603 6.1 10.2 31.7 10 600 64.2 63.6
-8.4163 49.6603 6.1 10.2 31.6 10 600 64.7 62.1
-8.3962 49.6603 6.1 10.2 31.6 9.9 600 65.1 60.5
-8.3762 49.6603 6.1 10.2 31.5 9.9 600 62.4 57.3
-8.3562 49.6603 6.1 10.2 31.4 9.9 600 59.6 54.1
-8.3362 49.6603 6.1 10.2 31.3 9.8 600 57.7 51.5
-8.3161 49.6603 6.1 10.2 31.3 9.8 600 57.9 50.4
-8.2961 49.6603 6.1 10.2 31.2 9.8 600 58.5 49.5
-8.2761 49.6603 6.1 10.2 31.1 9.7 600 58.9 48.7
-8.256 49.6603 6.1 10.2 31 9.7 600 59.1 48
-8.236 49.6603 6.1 10.2 31 9.6 600 59.3 47.3
-8.216 49.6603 6.1 10.2 30.9 9.6 600 59.4 46.2
-8.1959 49.6603 6.1 10.2 30.8 9.5 600 59.5 44.9
-8.1759 49.6603 6.1 10.2 30.8 9.5 600 59.6 43.8
-8.1559 49.6603 6.1 10.2 30.7 9.4 600 59.7 43.3
-8.1358 49.6603 6.1 10.1 30.6 9.4 600 59.7 43
-8.1158 49.6603 6.1 10.1 30.6 9.4 600 59.8 42.5
-8.0958 49.6603 6.1 10.1 30.5 9.3 600 59.4 41.9
-8.0757 49.6603 6.1 10.1 30.5 9.3 600 58.8 41.1
-8.0557 49.6603 6.1 10.1 30.4 9.2 600 58.4 40.4
-8.0357 49.6603 6.1 10.1 30.3 9.2 600 58.5 39.8
-8.0156 49.6603 6.1 10.1 30.3 9.2 600 58.5 39.2
-7.9956 49.6603 6.1 10.1 30.2 9.1 600 58.4 39.1
-7.9756 49.6603 6.1 10.1 30.2 9.1 600 58.4 39.5
-7.9556 49.6603 6.1 10.1 30.2 9.1 600 58.1 39.7
-7.9355 49.6603 6.1 10.2 30.1 9.1 600 58 39.5
-7.9155 49.6603 6.1 10.2 30.1 9.1 600 57.9 39.2
-7.8955 49.6603 6.1 10.2 30.1 9.1 600 57.8 39
-7.8754 49.6603 6.1 10.2 30 9.1 600 58 39.8
-7.8554 49.6603 6.1 10.2 30 9.1 614 58.2 40.9
-7.8354 49.6603 6.1 10.2 30 9.1 625 59.5 42.3
-7.8153 49.6603 6.1 10.2 29.9 9.1 625 62.4 44.3
-7.7953 49.6603 6.1 10.2 29.9 9.1 625 65.1 46.3
-7.7753 49.6603 6.1 10.2 29.9 9.1 625 65.4 46.9
-7.7552 49.6603 6.1 10.2 29.8 9.1 625 64.8 46.8
-7.7352 49.6603 6.1 10.2 29.8 9.1 625 64.3 46.9
-7.7152 49.6603 6.1 10.2 29.8 9.1 625 63.8 47.7
-7.6951 49.6603 6.1 10.2 29.8 9.2 625 63.4 49
-7.6751 49.6603 6.1 10.2 29.8 9.2 625 64 50.9
-7.6551 49.6603 6.1 10.2 29.8 9.2 625 64.7 52.3
-7.6351 49.6603 6.1 10.2 29.8 9.3 625 64.5 53.1
-7.615 49.6603 6.1 10.2 29.8 9.3 625 64.2 53.5
-7.595 49.6603 6.1 10.2 29.9 9.3 624 64.1 55.6
-7.575 49.6603 6.1 10.1 29.9 9.4 600 63.9 57.7
-7.5549 49.6603 6.1 10.1 29.9 9.4 600 63.6 59.4
-7.5349 49.6603 6.1 10.1 29.9 9.5 600 63.5 61.1
-7.5149 49.6603 6.1 10.1 29.9 9.5 600 63.4 62.8
-7.4948 49.6603 6.1 10.1 29.9 9.5 600 63.3 64.5
-7.4748 49.6603 6.1 10.1 30 9.6 600 63.2 66.3
-7.4548 49.6603 6.1 10.1 30 9.6 600 63.2 67.9
-7.4347 49.6603 6.1 10.1 30 9.6 600 63.1 69.2
-7.4147 49.6603 6.1 10.1 29.9 9.6 600 63.1 70.3
-7.3947 49.6603 6.1 10.1 29.9 9.6 600 63 71.4
-7.3746 49.6603 6.1 10.1 29.8 9.5 600 63 70.7
-7.3546 49.6603 6.1 10.1 29.8 9.5 600 63 69.2
-7.3346 49.6603 6.1 10.1 29.7 9.4 600 63 68.5
-7.3146 49.6603 6.1 10.2 29.7 9.4 600 63 68.2
-7.2945 49.6603 6.1 10.2 29.6 9.4 600 63 67.8
-7.2745 49.6603 6.1 10.2 29.6 9.3 600 63 67.4
-7.2545 49.6603 6.1 10.2 29.5 9.3 600 63.1 66.5
-7.2344 49.6603 6.1 10.2 29.5 9.3 600 63.1 65.6
-7.2144 49.6603 6.1 10.2 29.5 9.2 600 63.1 64.1
-7.1944 49.6603 6.1 10.2 29.5 9.3 600 63.2 62.4
-7.1743 49.6603 6.1 10.2 29.5 9.3 600 63.2 61
-7.1543 49.6603 6.1 10.2 29.4 9.2 600 63.3 59.3
-7.1343 49.6603 6.1 10.2 29.3 9.1 600 63.3 57.5
-7.1142 49.6603 6.1 10.2 29.2 8.9 600 63.4 55.5
-7.0942 49.6603 6.1 10.2 29.1 8.8 600 63.4 52.3
-7.0742 49.6603 6.1 10.3 29 8.7 600 63.5 49.1
-7.0541 49.6603 6.1 10.3 28.9 8.6 600 63.5 46.2
-7.0341 49.6603 6.1 10.3 28.8 8.5 605 63.5 43.6
-7.0141 49.6603 6.1 10.3 28.7 8.4 650 63.6 40.6
-6.9941 49.6603 6.1 10.3 28.6 8.2 650 63.6 38.2
-6.974 49.6603 6.1 10.3 28.5 8.1 650 63.6 36.5
-6.954 49.6603 6.1 10.3 28.4 8 650 63.7 34.8
-6.934 49.6603 6.1 10.4 28.3 7.9 650 63.7 33.4
-6.9139 49.6603 6.1 10.4 28.3 7.8 650 63.7 32.3
-6.8939 49.6603 6.1 10.4 28.3 7.8 650 63.8 31.4
-6.8739 49.6603 6.1 10.4 28.4 7.8 650 63.8 31.3
-6.8538 49.6603 6.1 10.4 28.5 7.8 650 63.8 31.4
-6.8338 49.6603 6.1 10.3 28.6 7.9 650 63.8 31.6
-6.8138 49.6603 6.1 10.3 28.7 8 650 63.8 31.8
-6.7937 49.6603 6.1 10.3 28.8 8 650 63.8 32.1
-6.7737 49.6603 6.1 10.3 28.9 8.1 650 63.8 32.6
-6.7537 49.6603 6.1 10.3 29 8.2 635 63.8 33.5
-6.7336 49.6603 6.1 10.3 29.1 8.2 625 63.8 34.2
-6.7136 49.6603 6.1 10.3 29.2 8.3 625 63.8 34.7
-6.6936 49.6603 6.1 10.3 29.3 8.3 625 63.8 35.2
-6.6736 49.6603 6.1 10.3 29.4 8.4 625 63.8 35.4
-6.6535 49.6603 6.1 10.3 29.4 8.4 625 63.8 35.3
-6.6335 49.6603 6.1 10.3 29.4 8.4 625 63.9 35.1
-6.6135 49.6603 6.1 10.3 29.4 8.3 625 63.9 34.9
-6.5934 49.6603 6.1 10.3 29.4 8.3 625 63.9 34.7
-6.5734 49.6603 6.1 10.3 29.4 8.2 625 64 34
-6.5534 49.6603 6.1 10.3 29.4 8.2 625 64 33.1
-6.5333 49.6603 6.1 10.3 29.4 8.1 625 64.1 31.9
-6.5133 49.6603 6.1 10.3 29.4 8.1 625 64.1 30.6
-6.4933 49.6603 6.1 10.3 29.4 8 625 64.2 29.7
-6.4732 49.6603 6.1 10.3 29.4 8 625 64.3 29.1
-6.4532 49.6603 6.1 10.3 29.4 8 625 64.4 28.4
-6.4332 49.6603 6.1 10.3 29.4 7.9 625 64.4 27.7
-6.4131 49.6603 6.1 10.3 29.4 7.9 625 64.5 27
-6.3931 49.6603 6.1 10.3 29.4 7.8 625 64.6 26.4
-6.3731 49.6603 6.1 10.3 29.3 7.7 625 64.7 25.9
-6.3531 49.6603 6.1 10.3 29.2 7.6 625 64.9 25.4
-6.333 49.6603 6.1 10.3 29 7.5 625 65 25
-6.313 49.6603 6.1 10.3 28.9 7.4 625 65.2 24.8
-6.293 49.6603 6.1 10.4 28.8 7.3 625 65.3 24.5
-6.2729 49.6603 6.1 10.4 28.7 7.2 625 65.6 23.8
-6.2529 49.6603 6.1 10.4 28.7 7.1 625 65.8 23
-6.2329 49.6603 6.1 10.4 28.6 7 625 66 22.4
-6.2128 49.6603 6.1 10.4 28.5 6.9 625 66.2 21.8
-6.1928 49.6603 6.1 10.4 28.4 6.8 641 66.4 21.3
-6.1728 49.6603 6.1 10.4 28.4 6.7 650 66.5 20.9
-6.1527 49.6603 6.1 10.4 28.3 6.7 650 66.9 20.5
-6.1327 49.6603 6.1 10.4 28.2 6.6 650 67.1 20.1
-6.1127 49.6603 6.1 10.4 28.2 6.5 650 66.6 19.6
-6.0926 49.6603 6.1 10.4 28.1 6.5 650 64.3 18.9
-6.0726 49.6603 6.1 10.4 28.1 6.4 650 64 18.6
-6.0526 49.6603 6.1 10.4 28 6.4 650 64.4 18.6
-6.0326 49.6603 6.1 10.4 28 6.5 650 64.9 18.7
-6.0125 49.6603 6.1 10.4 28.1 6.5 650 65.5 18.8
-5.9925 49.6603 6.1 10.4 28.1 6.5 650 65.5 18.8
-5.9725 49.6603 6.1 10.4 28.1 6.5 650 64.3 18.6
-5.9524 49.6603 6.1 10.4 28.1 6.6 650 60.7 17.8
-5.9324 49.6603 6.1 10.4 28.1 6.6 643 59.7 17.7
-5.9124 49.6603 6.1 10.4 28.1 6.6 600 59.9 17.9
-5.8923 49.6603 6.1 10.4 28.1 6.6 600 60.3 18.1
-5.8723 49.6603 6.1 10.4 28.1 6.7 600 60.4 18.5
-5.8523 49.6603 6.1 10.4 28.1 6.7 600 60.5 18.8
-5.8322 49.6603 6.1 10.4 28.1 6.7 600 60.6 18.8
-5.8122 49.6603 6.1 10.4 28.2 6.8 600 60.7 18.7
-5.7922 49.6603 6.1 10.4 28.2 6.8 600 60.9 18.8
-5.7721 49.6603 6.1 10.4 28.2 6.8 600 61 18.9
-5.7521 49.6603 6.1 10.3 28.2 6.8 600 61.3 19.1
-5.7321 49.6603 6.1 10.3 28.1 6.9 600 61.6 19.2
-5.7121 49.6603 6.1 10.3 28.1 6.9 600 61.8 19.3
-5.692 49.6603 6.1 10.3 28.1 6.9 600 62 19.3
-5.672 49.6603 6.1 10.3 28 6.9 600 62.2 19.4
-5.652 49.6603 6.1 10.3 28 6.9 600 62.1 19.4
-5.6319 49.6603 6.1 10.3 27.9 6.9 583 62.3 19.5
-5.6119 49.6603 6.1 10.3 27.9 6.9 575 62.5 19.5
-5.5919 49.6603 6.1 10.3 27.9 6.9 575 62.7 19.6
-5.5718 49.6603 6.1 10.3 27.8 6.9 575 62.8 19.8
-5.5518 49.6603 6.1 10.3 27.8 6.9 575 62.9 19.9
-5.5318 49.6603 6.1 10.3 27.7 6.8 575 62.6 20
-5.5117 49.6603 6.1 10.4 27.7 6.8 575 62.1 20
-5.4917 49.6603 6.1 10.4 27.6 6.8 575 61.9 20
-5.4717 49.6603 6.1 10.4 27.6 6.8 575 61.9 20.2
-5.4516 49.6603 6.1 10.4 27.5 6.7 575 62 20.4
-5.4316 49.6603 6.1 10.4 27.5 6.7 575 61.9 20.3
-5.4116 49.6603 6.1 10.4 27.5 6.7 575 61.7 20
-5.3915 49.6603 6.1 10.4 27.4 6.7 575 61.5 19.8
-5.3715 49.6603 6.1 10.4 27.4 6.7 570 61.5 19.7
-5.3515 49.6603 6.1 10.4 27.4 6.6 550 61.7 19.6
-5.3315 49.6603 6.1 10.4 27.3 6.6 550 61.7 19.5
-5.3114 49.6603 6.1 10.4 27.3 6.6 550 61.8 19.4
-5.2914 49.6603 6.1 10.4 27.3 6.6 550 61.9 19.4
-5.2714 49.6603 6.1 10.4 27.2 6.6 550 61.9 19.4
-5.2513 49.6603 6.1 10.4 27.2 6.6 550 62 19.4
-5.2313 49.6603 6.1 10.3 27.2 6.6 550 62.1 19.4
-5.2113 49.6603 6.1 10.3 27.2 6.6 550 62.2 19.4
-5.1912 49.6603 6.1 10.3 27 6.6 550 62.3 19.4
-5.1712 49.6603 6.1 10.3 27 6.5 550 62.4 19.3
-5.1512 49.6603 6.2 10.3 26.9 6.5 550 62.6 19.1
-5.1311 49.6603 6.2 10.3 26.8 6.5 550 62.7 18.9
-5.1111 49.6603 6.2 10.3 26.8 6.4 550 62.7 18.7
-5.0911 49.6603 6.1 10.3 26.7 6.4 532 62.8 18.5
-5.071 49.6603 6.2 10.3 26.6 6.4 525 62.9 18.4
-5.051 49.6603 6.2 10.3 26.6 6.3 525 63 18.2
-5.031 49.6603 6.2 10.3 26.5 6.3 525 63.1 18.1
-5.011 49.6603 6.2 10.3 26.4 6.2 525 63.2 18
-4.9909 49.6603 6.2 10.3 26.3 6.2 525 63.5 17.9
-4.9709 49.6603 6.2 10.3 26.2 6.1 525 63.9 17.9
-4.9509 49.6603 6.2 10.3 26.2 6 525 64.3 17.8
-4.9308 49.6603 6.2 10.3 26.1 6 525 64.3 17.8
-4.9108 49.6603 6.2 10.3 26 6 525 64.4 17.7
-4.8908 49.6603 6.2 10.4 25.9 5.9 525 64.5 17.6
-4.8707 49.6603 6.2 10.4 25.8 5.9 525 64.6 17.4
-4.8507 49.6603 6.2 10.4 25.7 5.8 525 64.8 17.3
-4.8307 49.6603 6.2 10.4 25.6 5.8 525 65.1 17.1
-4.8106 49.6603 6.2 10.4 25.5 5.7 525 65.2 17
-4.7906 49.6603 6.2 10.4 25.4 5.7 525 65.3 17
-4.7706 49.6603 6.2 10.4 25.3 5.6 525 65.3 16.9
-4.7505 49.6603 6.2 10.3 25.3 5.6 525 65.3 16.9
-4.7305 49.6603 6.2 10.3 25.2 5.6 525 65.1 16.8
-4.7105 49.6603 6.2 10.3 25.2 5.6 525 65 16.8
-4.6905 49.6603 6.2 10.3 25.2 5.6 525 65.1 16.8
-4.6704 49.6603 6.2 10.3 25.1 5.6 525 65.1 16.8
-4.6504 49.6603 6.2 10.3 25 5.6 525 65.1 16.8
-4.6304 49.6603 6.2 10.3 24.9 5.5 525 65.2 16.8
-4.6103 49.6603 6.2 10.3 24.8 5.5 525 65.2 16.8
-4.5903 49.6603 6.2 10.3 24.7 5.5 525 65 16.8
-4.5703 49.6603 6.2 10.3 24.7 5.5 525 64.9 16.8
-4.5502 49.6603 6.2 10.3 24.6 5.5 525 65 16.7
-4.5302 49.6603 6.2 10.3 24.5 5.5 506 65 16.8
-4.5102 49.6603 6.2 10.3 24.5 5.5 500 65 16.8
-4.4901 49.6603 6.2 10.3 24.4 5.5 500 65.1 16.8
-4.4701 49.6603 6.2 10.3 24.4 5.5 500 65.2 16.9
-4.4501 49.6603 6.2 10.3 24.3 5.4 500 65.3 17
-4.43 49.6603 6.2 10.3 24.3 5.4 500 65.3 17.1
-4.41 49.6603 6.2 10.3 24.3 5.4 500 65.5 17.2
-4.39 49.6603 6.2 10.2 24.2 5.4 500 65.5 17.3
-4.37 49.6603 6.2 10.2 24.2 5.4 497 65.6 17.5
-4.3499 49.6603 6.2 10.2 24.2 5.4 497 65.7 17.7
-4.3299 49.6603 6.2 10.2 24.1 5.5 497 65.7 17.9
-4.3099 49.6603 6.3 10.2 24.1 5.5 497 65.9 18.1
-4.2898 49.6603 6.3 10.2 24 5.5 497 65.9 18.3
-4.2698 49.6603 6.3 10.2 24 5.5 486 65.9 18.5
-4.2498 49.6603 6.3 10.2 24 5.5 450 66 18.7
-4.2297 49.6603 6.3 10.2 23.9 5.5 450 66 18.9
-4.2097 49.6603 6.3 10.2 23.8 5.5 450 66.1 19.2
-4.1897 49.6603 6.3 10.2 23.8 5.5 450 66.1 19.5
-4.1696 49.6603 6.3 10.2 23.7 5.5 450 66.1 19.8
-4.1496 49.6603 6.3 10.2 23.7 5.5 450 66.2 20.2
-4.1296 49.6603 6.3 10.2 23.6 5.6 450 66.2 20.6
-4.1095 49.6603 6.3 10.2 23.5 5.6 450 66.3 21
-4.0895 49.6603 6.3 10.1 23.6 5.6 450 66.4 21.6
-4.0695 49.6603 6.3 10.1 23.6 5.5 450 66.4 22.1
-4.0495 49.6603 6.3 10.1 23.6 5.5 450 66.6 22.6
-4.0294 49.6603 6.3 10 23.6 5.5 450 66.9 23.1
-4.0094 49.6603 6.3 10 23.7 5.5 450 67.4 23.6
-3.9894 49.6603 6.3 10 23.7 5.5 450 67.5 24.1
-3.9693 49.6603 6.3 10 23.7 5.6 372 67.5 24.4
-3.9493 49.6603 6.3 10 23.6 5.6 356 67.5 25
-3.9293 49.6603 6.3 10 23.6 5.7 393 67.5 25.2
-3.9092 49.6603 6.3 10 23.6 5.7 400 67.5 25.2
-3.8892 49.6603 6.4 9.9 23.6 5.8 400 67.7 25.4
-3.8692 49.6603 6.4 9.9 23.5 5.8 400 67.7 25.5
-3.8491 49.6603 6.4 9.9 23.5 5.8 400 67.7 25.5
-3.8291 49.6603 6.4 9.9 23.5 5.9 400 67.8 25.4
-3.8091 49.6603 6.4 9.9 23.5 5.9 400 67.8 25.4
-3.789 49.6603 6.4 9.9 23.5 5.9 400 67.8 25.5
-3.769 49.6603 6.4 9.8 23.5 5.9 400 67.8 25.6
-3.749 49.6603 6.4 9.8 23.4 5.9 400 67.8 25.7
-3.729 49.6603 6.4 9.8 23.4 5.9 400 67.9 25.8
-3.7089 49.6603 6.4 9.8 23.4 5.8 426 67.9 25.9
-3.6889 49.6603 6.4 9.8 23.3 5.8 500 67.9 26
-3.6689 49.6603 6.4 9.9 23.2 5.8 500 67.9 26
-3.6488 49.6603 6.4 9.9 23.1 5.8 500 68 26.1
-3.6288 49.6603 6.4 9.9 23 5.7 500 68 26
-3.6088 49.6603 6.4 9.9 22.9 5.7 500 68 25.9
-3.5887 49.6603 6.4 10 22.8 5.7 500 68 25.8
-3.5687 49.6603 6.4 10 22.7 5.6 500 68.1 25.6
-3.5487 49.6603 6.4 10 22.6 5.6 500 68.1 25.3
-3.5286 49.6603 6.4 10 22.5 5.6 500 68.1 25.2
-3.5086 49.6603 6.4 10 22.5 5.6 500 68.1 24.9
-3.4886 49.6603 6.4 10 22.4 5.5 500 68.1 24.5
-3.4685 49.6603 6.4 10 22.4 5.5 500 68.1 24.1
-3.4485 49.6603 6.4 10 22.3 5.5 500 68.1 23.7
-3.4285 49.6603 6.4 10 22.3 5.5 500 68.5 23.5
-3.4085 49.6603 6.4 9.9 22.3 5.4 397 69.2 23.3
-3.3884 49.6603 6.4 9.9 22.2 5.4 375 69.9 23.2
-3.3684 49.6603 6.5 9.9 22.2 5.4 375 70.1 23.1
-3.3484 49.6603 6.5 9.9 22.2 5.3 375 70.1 23
-3.3283 49.6603 6.5 9.8 22.2 5.3 375 70.1 22.8
-3.3083 49.6603 6.5 9.8 22.1 5.3 375 70 22.9
-3.2883 49.6603 6.5 9.8 22.1 5.2 375 69.9 22.9
-3.2682 49.6603 6.5 9.8 22 5.2 375 69.9 22.9
-3.2482 49.6603 6.5 9.8 21.8 5.1 375 69.7 23.1
-3.2282 49.6603 6.5 9.9 21.7 5.1 375 69.5 23.4
-3.2081 49.6603 6.5 9.9 21.6 5.1 375 69.2 23.5
-3.1881 49.6603 6.5 9.9 21.5 5 375 68.7 23.7
-3.1681 49.6603 6.5 9.9 21.5 5.1 375 68.2 23.9
-3.148 49.6603 6.5 9.8 21.6 5.1 352 70.3 24.8
-3.128 49.6603 6.5 9.8 21.6 5.2 300 73.8 26.2
-3.108 49.6603 6.5 9.8 21.6 5.2 300 76.7 27.5
-3.0879 49.6603 6.5 9.7 21.7 5.3 300 76.1 28
-3.0679 49.6603 6.5 9.7 21.7 5.3 300 75.1 28.5
-3.0479 49.6603 6.5 9.7 21.8 5.4 300 75.3 29.1
-3.0279 49.6603 6.5 9.7 21.8 5.4 300 75.4 29.6
-3.0078 49.6603 6.5 9.6 21.8 5.5 300 75.1 29.9
-2.9878 49.6603 6.5 9.6 21.8 5.5 300 74.8 30.2
-2.9678 49.6603 6.5 9.6 21.8 5.6 300 74.7 30.3
-2.9477 49.6603 6.5 9.6 21.8 5.6 300 74.6 30.4
-2.9277 49.6603 6.5 9.6 21.8 5.6 300 74.5 30.4
-2.9077 49.6603 6.5 9.6 21.8 5.6 300 74.5 30.3
-2.8876 49.6603 6.5 9.6 21.7 5.6 300 74.4 30.1
-2.8676 49.6603 6.5 9.6 21.7 5.6 300 74.4 30
-2.8476 49.6603 6.5 9.6 21.6 5.5 300 74.5 30
-2.8275 49.6603 6.5 9.6 21.6 5.5 300 74.5 30
-2.8075 49.6603 6.5 9.6 21.5 5.5 300 74.5 30.3
-2.7875 49.6603 6.5 9.6 21.5 5.5 300 74.6 30.4
-2.7674 49.6603 6.5 9.6 21.4 5.4 300 74.6 30.4
-2.7474 49.6603 6.5 9.6 21.4 5.4 300 74.8 30.7
-2.7274 49.6603 6.5 9.6 21.3 5.4 300 74.9 30.8
-2.7074 49.6603 6.5 9.6 21.3 5.4 300 75 31.1
-2.6873 49.6603 6.5 9.6 21.3 5.4 300 75.2 31.5
-2.6673 49.6603 6.5 9.6 21.4 5.4 300 75.3 31.7
-2.6473 49.6603 6.5 9.6 21.4 5.4 300 75.5 31.3
-2.6272 49.6603 6.5 9.6 21.4 5.4 300 75.9 30.8
-2.6072 49.6603 6.5 9.6 21.4 5.4 300 76.3 30.6
-2.5872 49.6603 6.5 9.6 21.4 5.4 300 77 30.7
-2.5671 49.6603 6.5 9.6 21.4 5.4 300 78.1 30.9
-2.5471 49.6603 6.5 9.6 21.4 5.4 300 79.3 31.1
-2.5271 49.6603 6.5 9.6 21.4 5.4 300 74.6 29.3
-2.507 49.6603 6.5 9.6 21.4 5.4 300 67.3 26.5
-2.487 49.6603 6.5 9.6 21.4 5.4 300 60.5 23.9
-2.467 49.6603 6.5 9.6 21.4 5.4 300 60.8 24
-2.4469 49.6603 6.5 9.5 21.4 5.5 300 61.4 24.3
-2.4269 49.6603 6.5 9.5 21.5 5.5 300 58.6 23.3
-2.4069 49.6603 6.5 9.5 21.5 5.5 300 59.7 23.9
-2.3869 49.6603 6.5 9.5 21.4 5.5 300 60.6 24.5
-2.3668 49.6603 6.5 9.5 21.4 5.5 300 60.5 24.4
-2.3468 49.6603 6.5 9.5 21.4 5.5 300 60.7 24.3
-2.3268 49.6603 6.5 9.5 21.4 5.5 300 59.2 23.6
-2.3067 49.6603 6.5 9.5 21.4 5.5 300 67.5 26.7
-2.2867 49.6603 6.5 9.5 21.4 5.5 300 78.3 30.8
-2.2667 49.6603 6.5 9.5 21.4 5.5 300 83.3 32.7
-2.2466 49.6603 6.5 9.5 21.4 5.5 300 83.4 32.9
-2.2266 49.6603 6.5 9.5 21.4 5.5 300 83.4 33.1
-2.2066 49.6603 6.5 9.5 21.3 5.5 300 83.1 33.2
-2.1865 49.6603 6.5 9.5 21.3 5.6 300 83.4 33.5
-2.1665 49.6603 6.5 9.5 21.3 5.5 300 83.5 33.8
-2.1465 49.6603 6.5 9.5 21.3 5.5 300 76.7 31.3
-2.1264 49.6603 6.5 9.5 21.3 5.6 300 64.9 26.9
-2.1064 49.6603 6.5 9.4 21.3 5.6 300 62 25.9
-2.0864 49.6603 6.5 9.4 21.3 5.6 300 63.5 26.6
-2.0664 49.6603 6.5 9.4 21.3 5.6 300 65.1 27.5
-2.0463 49.6603 6.5 9.4 21.3 5.6 300 66.1 28.1
-2.0263 49.6603 6.5 9.4 21.3 5.7 300 66.6 28.6
-2.0063 49.6603 6.5 9.4 21.3 5.7 300 66.9 29.2
-1.9862 49.6603 6.5 9.4 21.3 5.7 300 67 29.7
-1.9662 49.6603 6.5 9.3 21.3 5.7 300 66.9 29.9
-1.9462 49.6603 6.5 9.3 21.3 5.8 300 66.7 30
-1.9261 49.6603 6.5 9.3 21.3 5.8 300 66.3 30.2
-1.9061 49.6603 6.5 9.3 21.3 5.8 300 68.3 30.9
-1.8861 49.6603 6.5 9.3 21.2 5.8 300 71.5 32
-1.866 49.6603 6.5 9.3 21.2 5.8 300 75.3 33.5
-1.846 49.6603 6.5 9.3 21.2 5.8 300 75.7 34.5
-1.826 49.6603 6.5 9.3 21.2 5.8 300 74.9 35.2
-1.8059 49.6603 6.5 9.3 21.2 5.8 300 74.4 35
-1.7859 49.6603 6.5 9.3 21.2 5.8 300 74 34.2
-1.7659 49.6603 6.5 9.3 21.1 5.8 300 73.6 33.7
-1.7459 49.6603 6.5 9.3 21.1 5.7 323 73.4 33.4
-1.7258 49.6603 6.5 9.3 21.1 5.7 325 73.3 33.3
-1.7058 49.6603 6.5 9.3 21.1 5.7 325 73.3 33.2
-1.6858 49.6603 6.5 9.3 21.1 5.7 325 73.2 33
-1.6657 49.6603 6.5 9.3 21 5.7 325 73.2 32.8
-1.6457 49.6603 6.5 9.3 21 5.7 325 71.5 32.1
-1.6257 49.6603 6.5 9.3 21 5.7 325 66.9 30.6
-1.6056 49.6603 6.5 9.3 21 5.7 325 64.1 29.5
-1.5856 49.6603 6.5 9.3 21.1 5.7 325 65.4 29.9
-1.5656 49.6603 6.4 9.3 21.1 5.7 325 69.6 31.1
-1.5455 49.6603 6.4 9.3 21.1 5.7 325 72.3 31.9
-1.5255 49.6603 6.4 9.4 21.1 5.7 325 72 31.2
-1.5055 49.6603 6.4 9.4 21.1 5.6 325 71.4 30.4
-1.4854 49.6603 6.4 9.4 21.1 5.6 345 71 29.8
-1.4654 49.6603 6.4 9.4 21.1 5.6 375 70.4 29.5
-1.4454 49.6603 6.4 9.4 21.1 5.6 375 72.1 29.7
-1.4254 49.6603 6.4 9.5 21.1 5.6 375 73.3 29.9
-1.4053 49.6603 6.4 9.5 21.1 5.6 375 73.7 30
-1.3853 49.6603 6.4 9.5 21.1 5.5 375 73.8 29.9
-1.3653 49.6603 6.4 9.5 21.1 5.5 375 73.9 29.5
-1.3452 49.6603 6.4 9.6 21.1 5.5 375 73.5 28.9
-1.3252 49.6603 6.4 9.6 21.2 5.5 375 69.8 27.9
-1.3052 49.6603 6.4 9.6 21.4 5.5 375 68.4 27.4
-1.2851 49.6603 6.4 9.6 21.5 5.5 375 68.1 27.3
-1.2651 49.6603 6.4 9.6 21.6 5.5 375 67.1 26.9
-1.2451 49.6603 6.4 9.7 21.7 5.5 375 64.3 25.7
-1.225 49.6603 6.4 9.7 21.8 5.6 375 63.3 25.1
-1.205 49.6603 6.4 9.7 21.9 5.6 443 63.2 24.8
-1.185 49.6603 6.4 9.7 22 5.6 450 62.8 24.5
-1.1649 49.6603 6.4 9.7 22.1 5.6 450 61.7 23.8
-1.1449 49.6603 6.4 9.7 22.3 5.6 450 61 23.3
-1.1249 49.6603 6.4 9.8 22.4 5.6 450 60.5 23
-1.1049 49.6603 6.4 9.8 22.5 5.7 450 59.8 22.5
-1.0848 49.6603 6.4 9.8 22.6 5.7 450 59 22
-1.0648 49.6603 6.4 9.8 22.7 5.7 450 58 21.5
-1.0448 49.6603 6.4 9.8 22.8 5.8 450 57.6 21.3
-1.0247 49.6603 6.4 9.7 23 5.8 450 65.9 24
-1.0047 49.6603 6.4 9.7 23.1 5.8 450 77.7 27.9
-0.9847 49.6603 6.4 9.7 23.3 5.9 450 81.1 28.9
-0.9646 49.6603 6.4 9.7 23.4 5.9 450 74.7 26.6
-0.9446 49.6603 6.4 9.7 23.5 5.9 460 64.3 23
-0.9246 49.6603 6.4 9.7 23.7 6 475 58.1 20.7
-0.9045 49.6603 6.4 9.7 23.8 6 475 58.4 20.6
-0.8845 49.6603 6.4 9.7 24 6 475 58.7 20.6
-0.8645 49.6603 6.4 9.7 24.1 6 475 58.1 20.2
-0.8444 49.6603 6.4 9.7 24.2 6 475 58.6 20.2
-0.8244 49.6603 6.4 9.8 24.2 6 475 63.6 21.6
-0.8044 49.6603 6.4 9.8 24.3 6 475 65.4 22.1
-0.7844 49.6603 6.4 9.8 24.4 6.1 475 65 21.9
-0.7643 49.6603 6.4 9.8 24.5 6.1 475 65.1 21.8
-0.7443 49.6603 6.4 9.8 24.5 6.1 475 75 24.9
-0.7243 49.6603 6.4 9.8 24.6 6.1 475 79.3 26.3
-0.7042 49.6603 6.4 9.8 24.7 6.1 475 79.8 26.5
-0.6842 49.6603 6.4 9.8 24.8 6.2 483 76.9 25.5
-0.6642 49.6603 6.4 9.8 24.8 6.2 483 70 23.2
-0.6441 49.6603 6.4 9.9 24.9 6.2 526 59.8 20
-0.6241 49.6603 6.4 9.9 25 6.2 525 57 19.2
-0.6041 49.6603 6.4 9.9 25.1 6.3 525 58.2 19.7
-0.584 49.6603 6.4 9.9 25.2 6.3 525 60.5 20.4
-0.564 49.6603 6.4 9.9 25.3 6.4 525 61.4 20.6
-0.544 49.6603 6.4 9.8 25.4 6.4 528 62.2 20.9
-0.5239 49.6603 6.4 9.8 25.5 6.5 528 62.9 21
-0.5039 49.6603 6.4 9.8 25.6 6.5 528 63.2 21
-0.4839 49.6603 6.4 9.8 25.7 6.5 534 63.5 20.9
-0.4638 49.6603 6.4 9.8 25.7 6.5 550 63.7 20.8
-0.4438 49.6603 6.4 9.8 25.8 6.5 550 63.9 20.7
-0.4238 49.6603 6.4 9.8 25.8 6.5 550 64 20.5
-0.4038 49.6603 6.4 9.8 25.9 6.5 550 64.1 20.4
-0.3837 49.6603 6.4 9.9 26 6.5 550 64.2 20.2
-0.3637 49.6603 6.4 9.9 26 6.5 553 64.2 20
-0.3437 49.6603 6.4 9.9 26.1 6.6 553 64.3 19.8
-0.3236 49.6603 6.4 9.9 26.2 6.6 566 64.3 19.7
-0.3036 49.6603 6.4 9.9 26.2 6.6 575 64.4 19.5
-0.2836 49.6603 6.4 9.9 26.3 6.6 575 64.4 19.4
-0.2635 49.6603 6.4 9.9 26.3 6.6 575 64.4 19.3
-0.2435 49.6603 6.4 9.9 26.4 6.6 575 64.4 19.2
-0.2235 49.6603 6.4 9.9 26.4 6.6 575 64.5 19.1
-0.2034 49.6603 6.4 9.9 26.4 6.6 575 64.5 19.1
-0.1834 49.6603 6.4 9.9 26.4 6.6 575 64.5 19.2
-0.1634 49.6603 6.4 9.9 26.4 6.6 575 64.5 19.3
-0.1433 49.6603 6.4 9.9 26.5 6.6 575 64.5 19.4
-0.1233 49.6603 6.4 9.8 26.5 6.6 575 64.5 19.3
-0.1033 49.6603 6.4 9.8 26.6 6.6 575 64.5 19.2
-0.0833 49.6603 6.4 9.8 26.6 6.6 575 64.5 19.1
-0.0632 49.6603 6.4 9.8 26.7 6.7 575 64.5 19.2
-0.0432 49.6603 6.4 9.8 26.7 6.7 575 64.5 19.3
-0.0232 49.6603 6.4 9.8 26.8 6.8 575 64.5 19.4
-0.0031 49.6603 6.4 9.8 26.8 6.8 575 64.5 19.6
0.0169 49.6603 6.4 9.8 26.9 6.8 575 64.5 19.8
0.0369 49.6603 6.4 9.8 26.9 6.9 575 64.5 20
0.057 49.6603 6.4 9.8 27 6.9 575 64.4 20.2
0.077 49.6603 6.4 9.9 27 6.9 575 64.4 20.6
0.097 49.6603 6.4 10 27.1 6.9 575 64.4 21.2
0.1171 49.6603 6.4 10 27.1 7 575 64.3 21.8
0.1371 49.6603 6.4 10 27.2 7 575 64.3 21.7
0.1571 49.6603 6.4 10 27.2 7 575 64.3 21.2
0.1772 49.6603 6.4 10 27.3 7.1 575 64.3 20.6
0.1972 49.6603 6.4 10 27.3 7.1 575 64.2 20.4
0.2172 49.6603 6.4 10 27.4 7.1 575 64.2 20.5
0.2372 49.6603 6.4 9.9 27.4 7.1 575 64.2 20.5
0.2573 49.6603 6.4 9.9 27.5 7.1 575 64.1 20.6
0.2773 49.6603 6.4 9.9 27.5 7.2 575 64.1 20.6
0.2973 49.6603 6.4 9.9 27.6 7.2 575 64.1 20.6
0.3174 49.6603 6.4 9.9 27.6 7.2 575 64 20.7
0.3374 49.6603 6.4 9.8 27.6 7.2 575 64 20.9
0.3574 49.6603 6.4 9.8 27.7 7.2 575 64 21.1
0.3775 49.6603 6.4 9.7 27.7 7.2 575 64 21.2
0.3975 49.6603 6.4 9.7 27.7 7.3 575 63.9 21.2
0.4175 49.6603 6.4 9.7 27.8 7.3 575 63.9 21.3
0.4376 49.6603 6.4 9.7 27.8 7.3 575 63.9 21.2
0.4576 49.6603 6.4 9.7 27.8 7.3 575 63.9 21.2
0.4776 49.6603 6.4 9.7 27.9 7.4 575 63.8 21.3
0.4977 49.6603 6.4 9.7 27.9 7.4 575 63.8 21.4
0.5177 49.6603 6.4 9.7 27.9 7.4 575 63.8 21.5
0.5377 49.6603 6.4 9.7 28 7.4 575 63.8 21.7
0.5577 49.6603 6.4 9.7 28 7.5 575 63.8 21.8
0.5778 49.6603 6.4 9.7 28 7.5 575 63.7 22
0.5978 49.6603 6.4 9.6 28.1 7.5 575 63.7 22.2
0.6178 49.6603 6.4 9.6 28.1 7.5 575 63.7 22.5
0.6379 49.6603 6.4 9.6 28.1 7.6 575 63.7 22.7
0.6579 49.6603 6.4 9.6 28.2 7.6 575 63.7 22.9
0.6779 49.6603 6.4 9.6 28.2 7.6 575 63.7 23.3
0.698 49.6603 6.4 9.6 28.3 7.7 575 63.7 23.7
0.718 49.6603 6.4 9.6 28.3 7.7 575 63.7 23.7
0.738 49.6603 6.4 9.6 28.3 7.7 575 63.6 23.8
0.7581 49.6603 6.4 9.6 28.3 7.8 575 63.6 23.8
0.7781 49.6603 6.4 9.6 28.4 7.8 575 63.6 24
0.7981 49.6603 6.4 9.6 28.4 7.8 575 63.6 24.3
0.8182 49.6603 6.4 9.6 28.4 7.8 575 63.6 24.4
0.8382 49.6603 6.4 9.6 28.5 7.9 575 63.6 24.5
0.8582 49.6603 6.4 9.6 28.5 7.9 575 63.6 24.5
0.8782 49.6603 6.4 9.6 28.5 7.9 575 63.6 24.5
0.8983 49.6603 6.4 9.6 28.4 7.8 575 63.6 24.5
0.9183 49.6603 6.4 9.6 28.4 7.8 575 63.6 24.4
0.9383 49.6603 6.4 9.6 28.4 7.7 575 63.6 24.4
0.9584 49.6603 6.4 9.6 28.3 7.7 575 63.6 24.4
0.9784 49.6603 6.4 9.6 28.3 7.6 575 63.6 23.9
0.9984 49.6603 6.4 9.6 28.2 7.6 575 63.6 23.3
1.0185 49.6603 6.4 9.6 28.2 7.6 600 63.5 22.7
1.0385 49.6603 6.4 9.6 28.1 7.5 600 63.5 22.3
1.0585 49.6603 6.4 9.6 28.1 7.5 600 63.5 22
1.0786 49.6603 6.4 9.6 28.1 7.4 600 63.5 21.8
1.0986 49.6603 6.4 9.6 28 7.4 600 63.5 21.5
1.1186 49.6603 6.4 9.6 28 7.3 600 63.5 21.4
1.1387 49.6603 6.4 9.6 28 7.3 600 63.5 21.1
1.1587 49.6603 6.4 9.6 28 7.3 600 63.5 20.9
1.1787 49.6603 6.4 9.6 28 7.4 600 63.5 20.7
1.1987 49.6603 6.4 9.6 28 7.4 600 63.5 20.6
1.2188 49.6603 6.4 9.6 28.1 7.4 600 63.5 20.7
1.2388 49.6603 6.4 9.6 28.1 7.4 600 63.5 20.6
1.2588 49.6603 6.4 9.6 28.1 7.4 600 63.5 20.6
1.2789 49.6603 6.4 9.6 28.1 7.4 600 63.4 20.5
1.2989 49.6603 6.4 9.6 28.1 7.4 600 63.4 20.6
1.3189 49.6603 6.5 9.6 28.2 7.5 600 63.4 20.6
1.339 49.6603 6.4 9.6 28.2 7.5 600 63.4 20.5
1.359 49.6603 6.5 9.6 28.2 7.5 600 63.4 20.5
1.379 49.6603 6.5 9.6 28.2 7.5 600 63.4 20.5
1.3991 49.6603 6.5 9.6 28.1 7.5 600 63.4 20.5
1.4191 49.6603 6.5 9.5 28.1 7.5 600 63.4 20.5
1.4391 49.6603 6.5 9.5 28.1 7.5 600 63.4 20.6
1.4592 49.6603 6.5 9.5 28.2 7.5 600 63.4 20.8
1.4792 49.6603 6.5 9.5 28.2 7.5 600 63.4 20.9
1.4992 49.6603 6.5 9.5 28.2 7.5 600 63.4 21.2
1.5192 49.6603 6.5 9.5 28.2 7.5 600 63.4 21.5
1.5393 49.6603 6.5 9.5 28.3 7.5 600 63.3 21.6
1.5593 49.6603 6.5 9.5 28.3 7.5 600 63.3 21.7
1.5793 49.6603 6.5 9.5 28.3 7.6 600 63.3 21.7
1.5994 49.6603 6.5 9.5 28.3 7.6 600 63.3 21.8
1.6194 49.6603 6.5 9.5 28.4 7.6 600 63.3 22
1.6394 49.6603 6.5 9.5 28.4 7.6 600 63.3 22.3
1.6595 49.6603 6.5 9.5 28.4 7.7 600 63.3 22.4
1.6795 49.6603 6.5 9.5 28.4 7.7 600 63.2 22.5
1.6995 49.6603 6.5 9.5 28.4 7.7 600 63.2 22.8
1.7196 49.6603 6.5 9.5 28.5 7.8 600 63.2 23.1
1.7396 49.6603 6.5 9.4 28.5 7.8 600 63.2 23.5
1.7596 49.6603 6.5 9.4 28.6 8 600 63.2 24
1.7797 49.6603 6.5 9.4 28.6 8 597 63.1 24.6
1.7997 49.6603 6.5 9.4 28.7 8.1 588 63.1 25.4
1.8197 49.6603 6.5 9.4 28.8 8.2 575 63 25.9
1.8397 49.6603 6.5 9.3 28.8 8.3 547 63 26.3
1.8598 49.6603 6.5 9.4 28.9 8.3 525 63 26.8
1.8798 49.6603 6.5 9.4 28.9 8.4 525 63 27.5
1.8998 49.6603 6.6 9.5 29 8.4 525 62.9 28.2
1.9199 49.6603 6.6 9.6 29.1 8.4 525 62.9 29
1.9399 49.6603 6.6 9.6 29.1 8.5 525 62.8 29.6
1.9599 49.6603 6.6 9.7 29.2 8.5 525 62.8 30.3
1.98 49.6603 6.6 9.8 29.2 8.5 525 62.8 31.4
2 49.6603 6.6 9.8 29.3 8.6 525 62.7 33.1
-10.8 49.6804 6.3 10.1 31.2 8.4 550 58.5 23.6
-10.78 49.6804 6.3 10.1 31.3 8.4 550 58.7 24.1
-10.7599 49.6804 6.3 10.1 31.2 8.4 550 58.7 24.9
-10.7399 49.6804 6.3 10.2 31.2 8.4 550 58.7 25.4
-10.7199 49.6804 6.3 10.2 31.2 8.3 550 58.7 25.6
-10.6998 49.6804 6.3 10.2 31.2 8.3 550 58.7 25.9
-10.6798 49.6804 6.3 10.2 31.1 8.3 550 58.6 26.3
-10.6598 49.6804 6.3 10.2 31.1 8.2 550 58.6 26.8
-10.6397 49.6804 6.3 10.2 31.2 8.3 550 58.6 27.4
-10.6197 49.6804 6.3 10.2 31.3 8.4 550 58.5 28
-10.5997 49.6804 6.3 10.2 31.4 8.5 550 58.5 28.4
-10.5797 49.6804 6.3 10.2 31.6 8.7 550 58.5 29.2
-10.5596 49.6804 6.3 10.2 31.7 8.8 550 58.4 29.6
-10.5396 49.6804 6.3 10.1 31.8 8.8 550 58.4 29.2
-10.5196 49.6804 6.3 10.1 31.9 8.9 550 58.4 29.1
-10.4995 49.6804 6.3 10.1 32 9 550 58.4 29.5
-10.4795 49.6804 6.3 10.1 32.1 9.1 550 58.4 30.2
-10.4595 49.6804 6.3 10.1 32.2 9.2 550 58.4 30.8
-10.4394 49.6804 6.3 10.1 32.3 9.3 550 58.4 31.1
-10.4194 49.6804 6.3 10.1 32.4 9.3 550 58.4 31.6
-10.3994 49.6804 6.3 10.1 32.4 9.4 550 58.3 32.2
-10.3793 49.6804 6.3 10.1 32.5 9.5 550 58.3 33.1
-10.3593 49.6804 6.3 10.1 32.6 9.5 550 58.3 34.2
-10.3393 49.6804 6.3 10.1 32.6 9.6 574 58.3 35.2
-10.3192 49.6804 6.3 10.1 32.7 9.6 575 58.3 36.2
-10.2992 49.6804 6.3 10.1 32.7 9.7 575 58.2 36.9
-10.2792 49.6804 6.3 10.2 32.8 9.7 575 58.2 38
-10.2592 49.6804 6.3 10.2 32.8 9.8 575 58.2 39.2
-10.2391 49.6804 6.3 10.2 32.9 9.9 575 58.2 40.2
-10.2191 49.6804 6.3 10.2 32.9 9.9 575 58.2 41
-10.1991 49.6804 6.3 10.2 32.9 10 575 58.1 41.7
-10.179 49.6804 6.3 10.2 33 10 575 58.1 42
-10.159 49.6804 6.3 10.2 33.1 10 575 58.1 41
-10.139 49.6804 6.3 10.2 33.1 10 575 58.1 39.6
-10.1189 49.6804 6.3 10.2 33.1 10 575 58.2 38.4
-10.0989 49.6804 6.3 10.2 33.1 10 575 58.6 37.9
-10.0789 49.6804 6.2 10.2 33.1 10 586 58.9 37.3
-10.0588 49.6804 6.2 10.2 33.2 10 600 59.1 36.9
-10.0388 49.6804 6.2 10.2 33.2 10 600 59 36.7
-10.0188 49.6804 6.2 10.2 33.2 9.9 600 59 36.2
-9.9987 49.6804 6.2 10.2 33.2 9.9 600 58.9 36
-9.9787 49.6804 6.2 10.2 33.2 9.9 600 58.9 36
-9.9587 49.6804 6.2 10.2 33.2 9.9 600 58.8 36
-9.9387 49.6804 6.2 10.3 33.2 9.9 600 59.3 36
-9.9186 49.6804 6.2 10.3 33.3 9.9 600 60 36.1
-9.8986 49.6804 6.2 10.3 33.3 9.9 600 60.4 36.1
-9.8786 49.6804 6.2 10.3 33.3 9.9 600 60.4 35.8
-9.8585 49.6804 6.2 10.3 33.3 9.9 600 60.3 35.2
-9.8385 49.6804 6.2 10.3 33.3 9.9 600 60.2 34.7
-9.8185 49.6804 6.2 10.3 33.3 9.8 600 60.2 34.1
-9.7984 49.6804 6.2 10.3 33.3 9.8 624 60.1 33.5
-9.7784 49.6804 6.2 10.3 33.2 9.8 625 60.1 33
-9.7584 49.6804 6.2 10.3 33.2 9.7 625 60 32.4
-9.7383 49.6804 6.2 10.3 33.2 9.7 625 60 32
-9.7183 49.6804 6.2 10.3 33.2 9.7 625 59.9 31.7
-9.6983 49.6804 6.2 10.3 33.2 9.7 625 59.9 31.8
-9.6782 49.6804 6.2 10.3 33.2 9.6 625 59.9 31.9
-9.6582 49.6804 6.2 10.3 33.2 9.6 625 59.9 32.1
-9.6382 49.6804 6.2 10.3 33.1 9.6 625 59.8 32.1
-9.6182 49.6804 6.2 10.3 33 9.5 625 59.8 32.1
-9.5981 49.6804 6.2 10.4 32.9 9.5 625 59.8 32.1
-9.5781 49.6804 6.2 10.4 32.9 9.4 625 59.8 32
-9.5581 49.6804 6.2 10.4 32.8 9.4 625 59.8 32.1
-9.538 49.6804 6.2 10.4 32.8 9.4 625 59.8 32.5
-9.518 49.6804 6.2 10.4 32.8 9.5 625 59.8 33
-9.498 49.6804 6.2 10.4 32.8 9.5 625 59.8 33.3
-9.4779 49.6804 6.2 10.4 32.8 9.5 625 59.8 33.9
-9.4579 49.6804 6.2 10.4 32.8 9.5 625 59.7 34.2
-9.4379 49.6804 6.2 10.4 32.8 9.5 625 59.7 33.9
-9.4178 49.6804 6.2 10.4 32.7 9.6 625 59.7 33.3
-9.3978 49.6804 6.2 10.4 32.7 9.6 625 59.7 33.1
-9.3778 49.6804 6.2 10.4 32.7 9.6 625 59.8 33.5
-9.3577 49.6804 6.2 10.4 32.7 9.6 625 59.8 34
-9.3377 49.6804 6.2 10.4 32.6 9.6 625 59.8 34.4
-9.3177 49.6804 6.2 10.4 32.6 9.6 625 59.8 34.4
-9.2977 49.6804 6.2 10.4 32.5 9.6 625 59.8 34.3
-9.2776 49.6804 6.2 10.4 32.5 9.6 625 59.9 34.3
-9.2576 49.6804 6.2 10.4 32.5 9.6 625 59.9 34.2
-9.2376 49.6804 6.2 10.4 32.5 9.6 625 59.9 34.1
-9.2175 49.6804 6.2 10.4 32.4 9.6 625 59.9 34.5
-9.1975 49.6804 6.2 10.4 32.4 9.6 625 60 35
-9.1775 49.6804 6.2 10.4 32.4 9.6 625 60 35.5
-9.1574 49.6804 6.2 10.4 32.3 9.6 625 60 36
-9.1374 49.6804 6.2 10.4 32.3 9.6 625 60 36.7
-9.1174 49.6804 6.2 10.4 32.3 9.6 625 60 37.1
-9.0973 49.6804 6.2 10.4 32.3 9.6 625 59.9 37.4
-9.0773 49.6804 6.2 10.4 32.2 9.6 625 59.9 37.7
-9.0573 49.6804 6.2 10.4 32.2 9.6 625 59.9 37.7
-9.0372 49.6804 6.2 10.4 32.1 9.6 625 59.9 37
-9.0172 49.6804 6.2 10.4 32.1 9.6 625 59.8 36.1
-8.9972 49.6804 6.2 10.4 32 9.6 625 59.7 35.4
-8.9772 49.6804 6.2 10.4 32 9.6 625 59.7 34.8
-8.9571 49.6804 6.2 10.4 31.9 9.5 625 59.5 34.3
-8.9371 49.6804 6.2 10.4 31.9 9.5 625 59.3 34.1
-8.9171 49.6804 6.2 10.3 31.9 9.5 625 59.1 34.2
-8.897 49.6804 6.2 10.3 31.8 9.5 625 58.9 34.1
-8.877 49.6804 6.2 10.3 31.8 9.4 625 58.3 34.3
-8.857 49.6804 6.2 10.3 31.8 9.4 625 57.7 34.4
-8.8369 49.6804 6.2 10.3 31.7 9.4 625 58.3 34.8
-8.8169 49.6804 6.2 10.3 31.8 9.4 625 61.5 36.7
-8.7969 49.6804 6.1 10.3 31.8 9.5 625 64.1 38.5
-8.7768 49.6804 6.1 10.3 31.9 9.5 625 64.4 39.5
-8.7568 49.6804 6.1 10.3 31.9 9.6 625 63.8 40.3
-8.7368 49.6804 6.1 10.3 31.9 9.6 625 63.3 41.2
-8.7167 49.6804 6.1 10.3 32 9.7 625 62.9 43.1
-8.6967 49.6804 6.1 10.3 32 9.8 625 62.5 45.5
-8.6767 49.6804 6.1 10.2 32 9.8 600 63.3 48.5
-8.6567 49.6804 6.1 10.2 32 9.9 600 64 52
-8.6366 49.6804 6.1 10.2 32 9.9 600 63.8 55.4
-8.6166 49.6804 6.1 10.2 32.1 10 600 63.5 58.9
-8.5966 49.6804 6.1 10.2 32.1 10.1 600 63.3 62.7
-8.5765 49.6804 6.1 10.2 32.1 10.1 600 63.2 66.7
-8.5565 49.6804 6.1 10.2 32.1 10.2 600 63.1 70.3
-8.5365 49.6804 6.1 10.2 32.1 10.2 600 63.1 71.6
-8.5164 49.6804 6.1 10.2 32 10.2 600 63.1 72.4
-8.4964 49.6804 6.1 10.2 32 10.2 600 63.2 71.5
-8.4764 49.6804 6.1 10.2 31.9 10.1 600 63.3 69.2
-8.4563 49.6804 6.1 10.2 31.9 10.1 600 63.5 66.7
-8.4363 49.6804 6.1 10.2 31.8 10.1 600 63.9 64.2
-8.4163 49.6804 6.1 10.2 31.7 10 600 64.4 61.8
-8.3962 49.6804 6.1 10.2 31.7 10 600 64.8 60
-8.3762 49.6804 6.1 10.2 31.6 9.9 600 62.1 56.8
-8.3562 49.6804 6.1 10.2 31.5 9.9 600 59.2 53.7
-8.3362 49.6804 6.1 10.2 31.4 9.9 600 57.4 51.2
-8.3161 49.6804 6.1 10.2 31.4 9.8 600 57.6 50
-8.2961 49.6804 6.1 10.2 31.3 9.8 600 58.2 49.1
-8.2761 49.6804 6.1 10.2 31.2 9.7 600 58.5 48.3
-8.256 49.6804 6.1 10.2 31.1 9.7 600 58.7 47.7
-8.236 49.6804 6.1 10.2 31 9.6 600 58.9 46.9
-8.216 49.6804 6.1 10.2 31 9.6 600 59.1 45.8
-8.1959 49.6804 6.1 10.2 30.9 9.5 600 59.2 44.4
-8.1759 49.6804 6.1 10.2 30.8 9.5 600 59.3 43.3
-8.1559 49.6804 6.1 10.2 30.8 9.5 600 59.3 43
-8.1358 49.6804 6.1 10.2 30.7 9.4 600 59.4 43
-8.1158 49.6804 6.1 10.1 30.6 9.4 600 59.5 42.6
-8.0958 49.6804 6.1 10.1 30.6 9.3 600 59.5 41.9
-8.0757 49.6804 6.1 10.1 30.5 9.3 600 59.5 41.2
-8.0557 49.6804 6.1 10.1 30.5 9.3 600 59.2 40.5
-8.0357 49.6804 6.1 10.1 30.4 9.2 600 59.2 39.8
-8.0156 49.6804 6.1 10.1 30.3 9.2 600 59.3 39.1
-7.9956 49.6804 6.1 10.1 30.3 9.1 600 59.2 39
-7.9756 49.6804 6.1 10.1 30.2 9.1 600 58.8 39.1
-7.9556 49.6804 6.1 10.1 30.2 9.1 600 58.2 39.1
-7.9355 49.6804 6.1 10.2 30.2 9.1 600 57.9 38.8
-7.9155 49.6804 6.1 10.2 30.2 9.1 600 57.9 38.3
-7.8955 49.6804 6.1 10.2 30.1 9.1 600 57.9 38
-7.8754 49.6804 6.1 10.2 30.1 9.1 600 58.1 38.7
-7.8554 49.6804 6.1 10.2 30.1 9.1 614 58.7 39.2
-7.8354 49.6804 6.1 10.2 30 9.1 625 60.1 40.3
-7.8153 49.6804 6.1 10.2 30 9.1 625 60.8 41.3
-7.7953 49.6804 6.1 10.2 30 9.1 625 60.9 42.3
-7.7753 49.6804 6.1 10.2 29.9 9.1 625 60.5 42.7
-7.7552 49.6804 6.1 10.2 29.9 9.1 625 60 42.9
-7.7352 49.6804 6.1 10.2 29.8 9.1 625 59.5 43.4
-7.7152 49.6804 6.1 10.2 29.8 9.1 625 59.6 44.6
-7.6951 49.6804 6.1 10.2 29.8 9.1 625 62.2 47.6
-7.6751 49.6804 6.1 10.2 29.8 9.2 625 65.3 50.7
-7.6551 49.6804 6.1 10.2 29.8 9.2 625 65.9 51.9
-7.6351 49.6804 6.1 10.2 29.8 9.3 625 65.4 51.9
-7.615 49.6804 6.1 10.2 29.9 9.3 625 65 52
-7.595 49.6804 6.1 10.1 29.9 9.3 624 64.8 54
-7.575 49.6804 6.1 10.1 29.9 9.4 600 64.3 55.4
-7.5549 49.6804 6.1 10.1 29.9 9.4 600 64 57.1
-7.5349 49.6804 6.1 10.1 29.9 9.5 600 63.8 58.7
-7.5149 49.6804 6.1 10.1 29.9 9.5 600 63.6 60.2
-7.4948 49.6804 6.1 10.1 29.9 9.5 600 63.5 61.9
-7.4748 49.6804 6.1 10.1 29.9 9.5 600 63.4 63.4
-7.4548 49.6804 6.1 10.1 29.9 9.6 600 63.3 64.8
-7.4347 49.6804 6.1 10.1 29.9 9.6 600 63.2 66.3
-7.4147 49.6804 6.1 10.1 29.9 9.6 600 63.2 68.3
-7.3947 49.6804 6.1 10.1 29.8 9.5 600 63.1 69.7
-7.3746 49.6804 6.1 10.1 29.8 9.5 600 63.1 69.5
-7.3546 49.6804 6.1 10.1 29.8 9.5 600 63.1 69
-7.3346 49.6804 6.1 10.2 29.7 9.4 600 63.1 68.6
-7.3146 49.6804 6.1 10.2 29.6 9.4 600 63.1 68.4
-7.2945 49.6804 6.1 10.2 29.6 9.3 600 63.1 68.4
-7.2745 49.6804 6.1 10.2 29.6 9.3 600 63.1 68
-7.2545 49.6804 6.1 10.2 29.5 9.3 600 63.1 66.9
-7.2344 49.6804 6.1 10.2 29.5 9.3 600 63.1 65.8
-7.2144 49.6804 6.1 10.2 29.5 9.3 600 63.1 64.4
-7.1944 49.6804 6.1 10.2 29.5 9.3 600 63.2 63.1
-7.1743 49.6804 6.1 10.2 29.6 9.3 600 63.2 61.9
-7.1543 49.6804 6.1 10.2 29.5 9.2 600 63.2 60.3
-7.1343 49.6804 6.1 10.2 29.4 9.1 600 63.2 58.8
-7.1142 49.6804 6.1 10.2 29.3 9 600 63.3 57.1
-7.0942 49.6804 6.1 10.2 29.2 8.9 600 63.3 54.3
-7.0742 49.6804 6.1 10.3 29.1 8.7 600 63.4 51.8
-7.0541 49.6804 6.1 10.3 29 8.6 600 63.4 49.1
-7.0341 49.6804 6.1 10.3 28.9 8.5 605 63.4 46
-7.0141 49.6804 6.1 10.3 28.8 8.4 650 63.5 42.7
-6.9941 49.6804 6.1 10.3 28.7 8.3 650 63.5 40.2
-6.974 49.6804 6.1 10.3 28.6 8.2 650 63.5 38.3
-6.954 49.6804 6.1 10.3 28.5 8 650 63.5 36.4
-6.934 49.6804 6.1 10.3 28.5 8 650 63.6 34.9
-6.9139 49.6804 6.1 10.3 28.5 8 650 63.6 33.7
-6.8939 49.6804 6.1 10.3 28.5 7.9 650 63.6 32.6
-6.8739 49.6804 6.1 10.3 28.6 7.9 650 63.6 32.5
-6.8538 49.6804 6.1 10.3 28.7 8 650 63.6 32.7
-6.8338 49.6804 6.1 10.3 28.8 8 650 63.6 32.8
-6.8138 49.6804 6.1 10.3 28.9 8.1 650 63.7 33.1
-6.7937 49.6804 6.1 10.3 29 8.2 650 63.7 33.5
-6.7737 49.6804 6.1 10.3 29.1 8.2 650 63.7 33.9
-6.7537 49.6804 6.1 10.3 29.2 8.3 635 63.7 34.4
-6.7336 49.6804 6.1 10.3 29.3 8.4 625 63.7 34.9
-6.7136 49.6804 6.1 10.3 29.4 8.4 625 63.7 35.2
-6.6936 49.6804 6.1 10.3 29.5 8.5 625 63.7 35.5
-6.6736 49.6804 6.1 10.3 29.5 8.4 625 63.7 35.6
-6.6535 49.6804 6.1 10.3 29.5 8.4 625 63.7 35.5
-6.6335 49.6804 6.1 10.3 29.5 8.4 625 63.7 35.3
-6.6135 49.6804 6.1 10.3 29.5 8.3 625 63.8 34.9
-6.5934 49.6804 6.1 10.3 29.5 8.3 625 63.8 34.1
-6.5734 49.6804 6.1 10.3 29.5 8.2 625 63.8 33.2
-6.5534 49.6804 6.1 10.3 29.5 8.2 625 63.9 32.1
-6.5333 49.6804 6.1 10.3 29.5 8.1 625 63.9 31
-6.5133 49.6804 6.1 10.3 29.5 8.1 625 64 29.8
-6.4933 49.6804 6.1 10.3 29.5 8.1 625 64 28.8
-6.4732 49.6804 6.1 10.3 29.4 8 625 64.1 28.1
-6.4532 49.6804 6.1 10.3 29.4 8 625 64.2 27.3
-6.4332 49.6804 6.1 10.3 29.4 7.9 625 64.3 26.7
-6.4131 49.6804 6.1 10.3 29.4 7.8 625 64.4 26.1
-6.3931 49.6804 6.1 10.3 29.3 7.7 625 64.4 25.5
-6.3731 49.6804 6.1 10.3 29.1 7.6 625 64.5 25
-6.3531 49.6804 6.1 10.3 29 7.5 625 64.6 24.5
-6.333 49.6804 6.1 10.3 28.9 7.4 625 64.7 24.1
-6.313 49.6804 6.1 10.4 28.8 7.3 625 64.9 23.7
-6.293 49.6804 6.1 10.4 28.8 7.2 625 65 23.3
-6.2729 49.6804 6.1 10.4 28.6 7.1 625 65.1 22.9
-6.2529 49.6804 6.1 10.4 28.6 7 625 65.2 22.4
-6.2329 49.6804 6.1 10.4 28.5 6.9 625 65.4 21.9
-6.2128 49.6804 6.1 10.4 28.4 6.8 625 65.5 21.4
-6.1928 49.6804 6.1 10.4 28.3 6.7 641 65.7 21
-6.1728 49.6804 6.1 10.4 28.3 6.6 650 65.8 20.5
-6.1527 49.6804 6.1 10.4 28.2 6.6 650 65.9 20.2
-6.1327 49.6804 6.1 10.4 28.1 6.5 650 66.1 19.8
-6.1127 49.6804 6.1 10.4 28.1 6.5 650 66.2 19.5
-6.0926 49.6804 6.1 10.4 28.1 6.5 650 66.5 19.3
-6.0726 49.6804 6.1 10.4 28 6.4 650 66.9 19.2
-6.0526 49.6804 6.1 10.5 28 6.4 650 67.2 19.1
-6.0326 49.6804 6.1 10.4 28 6.4 650 67.6 19.1
-6.0125 49.6804 6.1 10.4 28 6.5 650 68.1 19.2
-5.9925 49.6804 6.1 10.4 28 6.5 650 66.7 18.9
-5.9725 49.6804 6.1 10.4 28 6.5 650 63.2 18.2
-5.9524 49.6804 6.1 10.4 28 6.5 650 61.5 17.9
-5.9324 49.6804 6.1 10.4 28 6.6 643 61.2 18
-5.9124 49.6804 6.1 10.4 28 6.6 600 61.5 18.2
-5.8923 49.6804 6.1 10.4 28 6.6 600 61.8 18.3
-5.8723 49.6804 6.1 10.4 28 6.6 600 62.1 18.6
-5.8523 49.6804 6.1 10.4 28.1 6.7 600 62.3 18.8
-5.8322 49.6804 6.1 10.4 28.1 6.7 600 62.5 19
-5.8122 49.6804 6.1 10.4 28.2 6.8 600 62.7 19.1
-5.7922 49.6804 6.1 10.4 28.2 6.8 600 63 19.3
-5.7721 49.6804 6.1 10.4 28.2 6.8 600 63.4 19.5
-5.7521 49.6804 6.1 10.4 28.2 6.8 600 63.9 19.6
-5.7321 49.6804 6.1 10.4 28.1 6.9 600 62.6 19.5
-5.7121 49.6804 6.1 10.4 28.1 6.9 600 60.9 19.1
-5.692 49.6804 6.1 10.3 28.1 6.9 600 61.1 19.2
-5.672 49.6804 6.1 10.3 28 6.9 600 61.3 19.1
-5.652 49.6804 6.1 10.3 28 6.9 600 61.6 19.1
-5.6319 49.6804 6.1 10.3 27.9 6.9 583 61.7 19.1
-5.6119 49.6804 6.1 10.3 27.9 6.9 575 62 19.1
-5.5919 49.6804 6.1 10.4 27.8 6.9 575 62.2 19.2
-5.5718 49.6804 6.1 10.4 27.8 6.8 575 62.4 19.4
-5.5518 49.6804 6.1 10.4 27.7 6.8 575 62.6 19.4
-5.5318 49.6804 6.1 10.4 27.7 6.8 575 62.2 19.5
-5.5117 49.6804 6.1 10.4 27.6 6.8 575 62.2 19.5
-5.4917 49.6804 6.1 10.4 27.6 6.7 575 62.4 19.7
-5.4717 49.6804 6.1 10.4 27.6 6.7 575 62.4 19.8
-5.4516 49.6804 6.1 10.4 27.5 6.7 575 62 19.8
-5.4316 49.6804 6.1 10.4 27.5 6.7 575 61.7 19.7
-5.4116 49.6804 6.1 10.4 27.4 6.6 575 61.6 19.5
-5.3915 49.6804 6.1 10.4 27.4 6.6 575 61.8 19.5
-5.3715 49.6804 6.1 10.4 27.4 6.6 570 61.9 19.4
-5.3515 49.6804 6.1 10.4 27.3 6.6 550 62.1 19.4
-5.3315 49.6804 6.1 10.4 27.3 6.6 550 62.2 19.4
-5.3114 49.6804 6.1 10.4 27.3 6.6 550 62.3 19.4
-5.2914 49.6804 6.1 10.4 27.3 6.6 550 62.1 19.4
-5.2714 49.6804 6.1 10.4 27.2 6.6 550 61.9 19.4
-5.2513 49.6804 6.1 10.4 27.2 6.6 550 62 19.4
-5.2313 49.6804 6.1 10.4 27.2 6.6 550 62.1 19.5
-5.2113 49.6804 6.1 10.3 27.2 6.6 550 62.2 19.5
-5.1912 49.6804 6.2 10.3 27 6.6 550 62.4 19.3
-5.1712 49.6804 6.2 10.3 27 6.5 550 62.5 19.3
-5.1512 49.6804 6.2 10.3 26.9 6.5 550 62.6 19.1
-5.1311 49.6804 6.2 10.3 26.8 6.5 550 62.6 18.9
-5.1111 49.6804 6.2 10.3 26.8 6.4 557 62.7 18.6
-5.0911 49.6804 6.2 10.3 26.7 6.4 532 62.7 18.5
-5.071 49.6804 6.2 10.3 26.6 6.4 525 62.9 18.2
-5.051 49.6804 6.2 10.3 26.5 6.3 525 62.9 18.1
-5.031 49.6804 6.2 10.3 26.5 6.2 525 63 18
-5.011 49.6804 6.2 10.3 26.4 6.2 525 63.1 17.8
-4.9909 49.6804 6.2 10.3 26.3 6.1 525 63.3 17.7
-4.9709 49.6804 6.2 10.4 26.2 6.1 525 63.5 17.6
-4.9509 49.6804 6.2 10.4 26.1 6 536 63.6 17.5
-4.9308 49.6804 6.2 10.4 26.1 6 538 63.7 17.5
-4.9108 49.6804 6.2 10.4 26 5.9 538 63.8 17.4
-4.8908 49.6804 6.2 10.4 25.9 5.9 538 63.8 17.4
-4.8707 49.6804 6.2 10.4 25.8 5.8 538 64.2 17.3
-4.8507 49.6804 6.2 10.4 25.7 5.8 538 64.6 17.1
-4.8307 49.6804 6.2 10.4 25.6 5.7 538 65 17
-4.8106 49.6804 6.2 10.4 25.5 5.7 558 65.1 17
-4.7906 49.6804 6.2 10.4 25.4 5.7 518 65.2 16.9
-4.7706 49.6804 6.2 10.4 25.4 5.7 518 65.1 16.9
-4.7505 49.6804 6.2 10.3 25.3 5.6 518 64.8 16.8
-4.7305 49.6804 6.2 10.3 25.3 5.6 518 64.5 16.7
-4.7105 49.6804 6.2 10.3 25.3 5.6 518 64.4 16.7
-4.6905 49.6804 6.2 10.3 25.2 5.6 518 64.4 16.7
-4.6704 49.6804 6.2 10.3 25.2 5.6 506 64.5 16.7
-4.6504 49.6804 6.2 10.3 25.1 5.6 500 64.5 16.7
-4.6304 49.6804 6.2 10.3 25 5.6 500 64.6 16.7
-4.6103 49.6804 6.2 10.3 24.9 5.6 500 64.7 16.7
-4.5903 49.6804 6.2 10.3 24.8 5.5 500 64.7 16.7
-4.5703 49.6804 6.2 10.3 24.7 5.5 500 64.8 16.7
-4.5502 49.6804 6.2 10.2 24.7 5.5 500 64.8 16.7
-4.5302 49.6804 6.2 10.3 24.6 5.5 500 64.9 16.7
-4.5102 49.6804 6.2 10.2 24.6 5.5 493 64.9 16.7
-4.4901 49.6804 6.2 10.2 24.5 5.5 480 64.8 16.7
-4.4701 49.6804 6.2 10.2 24.5 5.5 475 65 16.8
-4.4501 49.6804 6.2 10.2 24.5 5.5 475 65 16.8
-4.43 49.6804 6.2 10.2 24.4 5.4 475 65 16.9
-4.41 49.6804 6.2 10.2 24.4 5.4 475 65.1 17
-4.39 49.6804 6.2 10.2 24.3 5.4 475 65.2 17.1
-4.37 49.6804 6.2 10.2 24.3 5.4 475 65.3 17.3
-4.3499 49.6804 6.2 10.2 24.3 5.5 475 65.3 17.4
-4.3299 49.6804 6.2 10.2 24.2 5.5 475 65.4 17.6
-4.3099 49.6804 6.3 10.2 24.2 5.5 475 65.5 17.8
-4.2898 49.6804 6.3 10.2 24.1 5.5 475 65.5 18
-4.2698 49.6804 6.3 10.2 24.1 5.5 475 65.5 18.1
-4.2498 49.6804 6.3 10.2 24 5.5 468 65.5 18.4
-4.2297 49.6804 6.3 10.2 24 5.5 450 65.6 18.6
-4.2097 49.6804 6.3 10.2 23.9 5.5 450 65.6 18.9
-4.1897 49.6804 6.3 10.2 23.9 5.5 450 65.6 19.1
-4.1696 49.6804 6.3 10.2 23.8 5.5 450 65.7 19.5
-4.1496 49.6804 6.3 10.2 23.7 5.6 450 65.7 19.8
-4.1296 49.6804 6.3 10.2 23.7 5.6 450 65.8 20.3
-4.1095 49.6804 6.3 10.2 23.6 5.6 450 66 20.7
-4.0895 49.6804 6.3 10.1 23.6 5.6 450 66.2 21.2
-4.0695 49.6804 6.3 10.1 23.7 5.5 450 66.3 21.8
-4.0495 49.6804 6.3 10.1 23.7 5.5 450 66.4 22.4
-4.0294 49.6804 6.3 10 23.7 5.5 450 66.7 22.9
-4.0094 49.6804 6.3 10 23.7 5.6 450 66.8 23.5
-3.9894 49.6804 6.3 10 23.7 5.6 450 66.8 24.1
-3.9693 49.6804 6.3 10 23.7 5.6 411 66.8 24.7
-3.9493 49.6804 6.3 10 23.6 5.7 400 66.8 25.8
-3.9293 49.6804 6.3 10 23.6 5.7 400 66.9 26.3
-3.9092 49.6804 6.3 10 23.6 5.8 400 67.2 26.6
-3.8892 49.6804 6.3 10 23.6 5.8 400 67.5 27
-3.8692 49.6804 6.4 10 23.6 5.9 400 67.6 27.1
-3.8491 49.6804 6.4 10 23.5 5.9 400 67.7 26.9
-3.8291 49.6804 6.4 9.9 23.5 5.9 400 67.7 26.7
-3.8091 49.6804 6.4 9.9 23.5 5.9 400 67.7 26.7
-3.789 49.6804 6.4 9.9 23.5 5.9 400 67.8 26.8
-3.769 49.6804 6.4 9.9 23.5 5.9 400 67.8 26.9
-3.749 49.6804 6.4 9.9 23.5 5.9 400 67.9 27.1
-3.729 49.6804 6.4 9.9 23.4 5.9 400 67.9 27.2
-3.7089 49.6804 6.4 9.9 23.3 5.9 426 67.9 27.3
-3.6889 49.6804 6.4 9.9 23.2 5.8 500 67.9 27.3
-3.6689 49.6804 6.4 10 23.1 5.8 500 68 27.4
-3.6488 49.6804 6.4 10 23 5.8 500 68 27.4
-3.6288 49.6804 6.4 10 22.9 5.8 500 68.1 27.3
-3.6088 49.6804 6.4 10 22.8 5.7 500 68.1 27.2
-3.5887 49.6804 6.4 10.1 22.7 5.7 500 68.1 26.9
-3.5687 49.6804 6.4 10.1 22.6 5.6 500 68.1 26.7
-3.5487 49.6804 6.4 10.1 22.5 5.6 500 68.2 26.4
-3.5286 49.6804 6.4 10.1 22.5 5.6 500 68.2 26.1
-3.5086 49.6804 6.4 10.1 22.4 5.6 500 68.2 25.7
-3.4886 49.6804 6.4 10.1 22.3 5.6 500 68.2 25.3
-3.4685 49.6804 6.4 10.1 22.3 5.5 500 68.2 24.9
-3.4485 49.6804 6.4 10.1 22.3 5.5 500 68.1 24.4
-3.4285 49.6804 6.4 10 22.3 5.5 500 68.5 24.1
-3.4085 49.6804 6.4 10 22.2 5.4 397 69.2 23.9
-3.3884 49.6804 6.4 10 22.2 5.4 375 69.9 23.7
-3.3684 49.6804 6.4 10 22.2 5.4 375 70.2 23.5
-3.3484 49.6804 6.5 9.9 22.1 5.3 375 70.2 23.4
-3.3283 49.6804 6.5 9.9 22.1 5.3 375 70.1 23.2
-3.3083 49.6804 6.5 9.9 22.1 5.3 375 70.1 23.2
-3.2883 49.6804 6.5 9.8 22 5.2 375 70 23.2
-3.2682 49.6804 6.5 9.9 21.9 5.2 375 69.9 23.3
-3.2482 49.6804 6.5 9.9 21.8 5.1 375 69.8 23.5
-3.2282 49.6804 6.5 9.9 21.7 5.1 375 69.7 24.2
-3.2081 49.6804 6.5 9.9 21.6 5.1 375 69.4 25
-3.1881 49.6804 6.5 9.9 21.7 5.2 375 68.9 25.2
-3.1681 49.6804 6.5 9.8 21.7 5.2 375 68.7 24.9
-3.148 49.6804 6.5 9.8 21.8 5.3 352 70.5 25.7
-3.128 49.6804 6.5 9.8 21.8 5.3 300 71.7 26.5
-3.108 49.6804 6.5 9.8 21.8 5.4 300 71.4 27.1
-3.0879 49.6804 6.5 9.7 21.9 5.4 300 70.4 27.6
-3.0679 49.6804 6.5 9.7 21.9 5.5 300 72.4 28.9
-3.0479 49.6804 6.5 9.7 21.9 5.5 300 75.2 30.4
-3.0279 49.6804 6.5 9.7 22 5.5 300 75.7 31
-3.0078 49.6804 6.5 9.6 22 5.6 300 75.2 31.3
-2.9878 49.6804 6.5 9.6 22 5.6 300 74.8 31.6
-2.9678 49.6804 6.5 9.6 22 5.7 300 74.6 31.7
-2.9477 49.6804 6.5 9.6 22 5.7 300 74.4 31.8
-2.9277 49.6804 6.5 9.6 21.9 5.6 300 74.3 31.8
-2.9077 49.6804 6.5 9.6 21.9 5.6 300 74.3 31.5
-2.8876 49.6804 6.5 9.6 21.8 5.6 300 74.2 31.1
-2.8676 49.6804 6.5 9.6 21.8 5.6 300 74.2 31
-2.8476 49.6804 6.5 9.6 21.7 5.5 300 74.2 30.8
-2.8275 49.6804 6.5 9.6 21.7 5.5 300 74.2 30.7
-2.8075 49.6804 6.5 9.6 21.6 5.5 300 74.3 30.6
-2.7875 49.6804 6.5 9.6 21.6 5.5 300 74.3 30.6
-2.7674 49.6804 6.5 9.6 21.5 5.5 300 74.4 30.5
-2.7474 49.6804 6.5 9.6 21.5 5.4 300 74.5 30.6
-2.7274 49.6804 6.5 9.6 21.4 5.4 300 74.6 30.7
-2.7074 49.6804 6.5 9.6 21.4 5.4 300 74.7 30.9
-2.6873 49.6804 6.5 9.6 21.4 5.4 300 74.8 31
-2.6673 49.6804 6.5 9.6 21.4 5.4 300 75 31.2
-2.6473 49.6804 6.5 9.6 21.4 5.4 300 75.2 31.3
-2.6272 49.6804 6.5 9.6 21.5 5.4 300 75.5 31.1
-2.6072 49.6804 6.5 9.6 21.5 5.4 300 76 30.7
-2.5872 49.6804 6.5 9.6 21.5 5.4 300 76.9 30.8
-2.5671 49.6804 6.5 9.6 21.5 5.4 300 78.2 31.1
-2.5471 49.6804 6.5 9.6 21.5 5.4 300 77.6 30.7
-2.5271 49.6804 6.5 9.6 21.5 5.4 300 71.5 28.3
-2.507 49.6804 6.5 9.6 21.5 5.5 300 62.8 24.9
-2.487 49.6804 6.5 9.6 21.5 5.5 300 56.3 22.5
-2.467 49.6804 6.5 9.6 21.5 5.5 300 57.4 22.9
-2.4469 49.6804 6.5 9.6 21.5 5.5 300 59 23.6
-2.4269 49.6804 6.5 9.6 21.5 5.5 300 60.5 24.2
-2.4069 49.6804 6.5 9.6 21.5 5.5 300 61.4 24.7
-2.3869 49.6804 6.5 9.6 21.5 5.5 300 62.1 25.1
-2.3668 49.6804 6.5 9.6 21.5 5.5 300 61.5 24.8
-2.3468 49.6804 6.5 9.6 21.4 5.5 300 60.7 24.4
-2.3268 49.6804 6.5 9.5 21.4 5.5 300 60.7 24.3
-2.3067 49.6804 6.5 9.5 21.4 5.5 300 68.7 27.3
-2.2867 49.6804 6.5 9.5 21.4 5.5 300 71.3 28.5
-2.2667 49.6804 6.5 9.5 21.4 5.5 300 70 28.3
-2.2466 49.6804 6.5 9.5 21.4 5.5 300 69.3 28.2
-2.2266 49.6804 6.5 9.5 21.4 5.6 300 68.6 27.9
-2.2066 49.6804 6.5 9.5 21.4 5.6 300 68.2 27.9
-2.1865 49.6804 6.5 9.5 21.4 5.6 300 68 27.9
-2.1665 49.6804 6.5 9.5 21.4 5.6 300 67.4 27.8
-2.1465 49.6804 6.5 9.5 21.4 5.6 300 63.2 26.3
-2.1264 49.6804 6.5 9.5 21.4 5.6 300 62.7 26.2
-2.1064 49.6804 6.5 9.5 21.4 5.7 300 64 26.8
-2.0864 49.6804 6.5 9.4 21.4 5.7 300 65.2 27.3
-2.0664 49.6804 6.5 9.4 21.4 5.7 300 65.5 27.7
-2.0463 49.6804 6.5 9.4 21.4 5.7 300 65.8 28
-2.0263 49.6804 6.5 9.4 21.4 5.7 300 66 28.6
-2.0063 49.6804 6.5 9.4 21.4 5.7 300 66 29.1
-1.9862 49.6804 6.5 9.4 21.3 5.7 300 66 29.6
-1.9662 49.6804 6.5 9.3 21.3 5.8 300 65.8 29.8
-1.9462 49.6804 6.5 9.3 21.3 5.8 300 65.7 30.1
-1.9261 49.6804 6.5 9.3 21.3 5.8 300 67.2 30.7
-1.9061 49.6804 6.5 9.3 21.3 5.8 300 70.6 31.9
-1.8861 49.6804 6.5 9.3 21.3 5.8 300 73.2 32.9
-1.866 49.6804 6.5 9.3 21.2 5.8 300 73.4 33.5
-1.846 49.6804 6.5 9.3 21.2 5.8 300 72.3 34.1
-1.826 49.6804 6.5 9.3 21.2 5.8 300 71.3 34.4
-1.8059 49.6804 6.5 9.3 21.2 5.8 300 70.6 33.7
-1.7859 49.6804 6.5 9.3 21.2 5.8 300 69.6 32.7
-1.7659 49.6804 6.5 9.3 21.1 5.8 300 68.5 32
-1.7459 49.6804 6.5 9.3 21.1 5.8 323 67.8 31.6
-1.7258 49.6804 6.5 9.3 21.1 5.8 325 67.2 31.4
-1.7058 49.6804 6.5 9.3 21.1 5.7 325 66.6 31.2
-1.6858 49.6804 6.5 9.3 21.1 5.7 325 66.4 30.9
-1.6657 49.6804 6.5 9.3 21.1 5.7 325 65.9 30.6
-1.6457 49.6804 6.4 9.3 21.1 5.7 325 64.1 30
-1.6257 49.6804 6.5 9.3 21.1 5.7 325 61.4 28.9
-1.6056 49.6804 6.4 9.3 21.1 5.7 325 61.1 28.4
-1.5856 49.6804 6.4 9.3 21.1 5.7 325 63.6 29
-1.5656 49.6804 6.4 9.4 21.1 5.7 325 65.4 29.4
-1.5455 49.6804 6.4 9.4 21.1 5.7 325 65.8 29.3
-1.5255 49.6804 6.4 9.4 21.1 5.7 325 65.5 28.8
-1.5055 49.6804 6.4 9.4 21.1 5.7 325 65.2 28.1
-1.4854 49.6804 6.4 9.4 21.1 5.7 345 65 27.6
-1.4654 49.6804 6.4 9.4 21.1 5.6 375 67.2 27.9
-1.4454 49.6804 6.4 9.5 21.1 5.6 375 71 28.6
-1.4254 49.6804 6.4 9.5 21.1 5.6 375 73.8 29.1
-1.4053 49.6804 6.4 9.5 21.1 5.6 375 74.3 29
-1.3853 49.6804 6.4 9.6 21.2 5.5 375 74.3 28.7
-1.3653 49.6804 6.4 9.6 21.2 5.5 375 72.5 28
-1.3452 49.6804 6.4 9.6 21.2 5.4 375 68.2 26.8
-1.3252 49.6804 6.4 9.6 21.3 5.5 375 64.5 25.8
-1.3052 49.6804 6.4 9.7 21.4 5.5 375 63.4 25.5
-1.2851 49.6804 6.4 9.7 21.6 5.5 375 63.4 25.4
-1.2651 49.6804 6.4 9.7 21.7 5.5 375 62.9 25.2
-1.2451 49.6804 6.4 9.7 21.8 5.5 375 62.5 24.9
-1.225 49.6804 6.4 9.7 21.9 5.5 375 62.2 24.6
-1.205 49.6804 6.4 9.8 22 5.6 443 61.1 24
-1.185 49.6804 6.4 9.8 22.1 5.6 450 59.8 23.4
-1.1649 49.6804 6.4 9.8 22.2 5.6 450 61.2 23.7
-1.1449 49.6804 6.4 9.8 22.3 5.6 450 67.7 25.8
-1.1249 49.6804 6.4 9.8 22.4 5.7 450 68.6 26
-1.1049 49.6804 6.4 9.8 22.5 5.7 450 68.6 25.8
-1.0848 49.6804 6.4 9.8 22.7 5.7 450 68.3 25.5
-1.0648 49.6804 6.4 9.8 22.8 5.7 450 68.1 25.3
-1.0448 49.6804 6.4 9.8 22.9 5.8 450 69.5 25.6
-1.0247 49.6804 6.4 9.8 23 5.8 450 76.4 27.8
-1.0047 49.6804 6.4 9.8 23.2 5.8 450 82.5 29.8
-0.9847 49.6804 6.4 9.8 23.3 5.9 450 80.3 29.1
-0.9646 49.6804 6.4 9.8 23.5 5.9 470 72.4 26.3
-0.9446 49.6804 6.4 9.8 23.6 5.9 473 62.5 22.7
-0.9246 49.6804 6.4 9.8 23.7 6 488 55 19.8
-0.9045 49.6804 6.4 9.8 23.8 6 475 54.9 19.6
-0.8845 49.6804 6.4 9.8 24 6 475 54.7 19.4
-0.8645 49.6804 6.4 9.8 24.1 6 475 56.6 19.8
-0.8444 49.6804 6.4 9.8 24.1 6 475 63.9 21.8
-0.8244 49.6804 6.4 9.8 24.2 6 475 74.5 24.9
-0.8044 49.6804 6.4 9.8 24.3 6 495 78.6 26.1
-0.7844 49.6804 6.4 9.8 24.4 6 495 78.1 25.9
-0.7643 49.6804 6.4 9.8 24.4 6 550 77.4 25.6
-0.7443 49.6804 6.4 9.8 24.5 6.1 550 78.5 25.9
-0.7243 49.6804 6.4 9.8 24.6 6.1 550 78.5 26.1
-0.7042 49.6804 6.4 9.9 24.7 6.1 550 77 25.7
-0.6842 49.6804 6.4 9.9 24.8 6.1 550 70.3 23.6
-0.6642 49.6804 6.4 9.9 24.8 6.2 550 61.1 20.5
-0.6441 49.6804 6.4 9.9 24.9 6.2 532 56.4 18.9
-0.6241 49.6804 6.4 9.9 25 6.2 532 57.5 19.4
-0.6041 49.6804 6.4 9.9 25.1 6.3 550 59.6 20.2
-0.584 49.6804 6.4 9.9 25.2 6.3 550 60.8 20.7
-0.564 49.6804 6.4 9.9 25.3 6.4 550 61.6 21
-0.544 49.6804 6.4 9.9 25.5 6.4 550 62.2 21.1
-0.5239 49.6804 6.4 9.9 25.6 6.5 550 62.7 21.1
-0.5039 49.6804 6.4 9.9 25.7 6.5 550 62.9 21
-0.4839 49.6804 6.4 9.9 25.7 6.5 550 63.2 20.9
-0.4638 49.6804 6.4 9.9 25.8 6.5 550 63.4 20.8
-0.4438 49.6804 6.4 9.9 25.8 6.5 550 63.5 20.6
-0.4238 49.6804 6.4 9.9 25.9 6.5 550 63.7 20.5
-0.4038 49.6804 6.4 9.9 25.9 6.5 550 63.7 20.3
-0.3837 49.6804 6.4 9.9 26 6.5 550 63.8 20.1
-0.3637 49.6804 6.4 9.9 26 6.5 562 63.9 19.9
-0.3437 49.6804 6.4 9.9 26.1 6.5 575 64 19.7
-0.3236 49.6804 6.4 9.9 26.2 6.5 575 64 19.6
-0.3036 49.6804 6.4 9.9 26.2 6.5 575 64.1 19.4
-0.2836 49.6804 6.4 9.9 26.3 6.5 575 64.1 19.3
-0.2635 49.6804 6.4 9.9 26.3 6.5 575 64.2 19.2
-0.2435 49.6804 6.4 9.9 26.4 6.6 575 64.3 19.1
-0.2235 49.6804 6.4 9.9 26.4 6.6 575 64.3 19.1
-0.2034 49.6804 6.4 9.9 26.4 6.6 575 64.4 19.1
-0.1834 49.6804 6.4 9.9 26.5 6.6 575 64.4 19.2
-0.1634 49.6804 6.4 9.9 26.5 6.6 575 64.4 19.3
-0.1433 49.6804 6.4 9.9 26.5 6.6 575 64.4 19.4
-0.1233 49.6804 6.4 9.9 26.6 6.6 575 64.4 19.3
-0.1033 49.6804 6.4 9.9 26.6 6.6 575 64.4 19.2
-0.0833 49.6804 6.4 9.8 26.7 6.7 575 64.4 19.2
-0.0632 49.6804 6.4 9.8 26.7 6.7 575 64.4 19.3
-0.0432 49.6804 6.4 9.8 26.8 6.8 575 64.4 19.4
-0.0232 49.6804 6.4 9.8 26.9 6.8 575 64.4 19.6
-0.0031 49.6804 6.4 9.8 26.9 6.8 575 64.4 19.7
0.0169 49.6804 6.4 9.8 27 6.9 575 64.4 19.9
0.0369 49.6804 6.4 9.8 27 6.9 575 64.4 20.2
0.057 49.6804 6.4 9.8 27.1 6.9 575 64.4 20.4
0.077 49.6804 6.4 9.9 27.1 7 575 64.4 20.7
0.097 49.6804 6.4 9.9 27.2 7 575 64.3 21.2
0.1171 49.6804 6.4 9.9 27.2 7 575 64.3 21.6
0.1371 49.6804 6.4 9.9 27.3 7 575 64.3 21.6
0.1571 49.6804 6.4 9.9 27.3 7 575 64.2 21.2
0.1772 49.6804 6.4 9.9 27.4 7.1 575 64.2 20.8
0.1972 49.6804 6.4 9.9 27.4 7.1 575 64.2 20.6
0.2172 49.6804 6.4 9.9 27.5 7.1 575 64.2 20.6
0.2372 49.6804 6.4 9.9 27.5 7.2 575 64.1 20.6
0.2573 49.6804 6.4 9.8 27.5 7.2 575 64.1 20.7
0.2773 49.6804 6.4 9.8 27.6 7.2 575 64.1 20.7
0.2973 49.6804 6.4 9.8 27.6 7.2 575 64 20.7
0.3174 49.6804 6.4 9.8 27.7 7.3 575 64 20.9
0.3374 49.6804 6.4 9.7 27.7 7.3 575 64 21.1
0.3574 49.6804 6.4 9.7 27.7 7.3 575 64 21.2
0.3775 49.6804 6.4 9.7 27.8 7.3 575 63.9 21.2
0.3975 49.6804 6.4 9.7 27.8 7.3 575 63.9 21.3
0.4175 49.6804 6.4 9.7 27.8 7.4 575 63.9 21.6
0.4376 49.6804 6.4 9.7 27.9 7.4 575 63.9 21.7
0.4576 49.6804 6.4 9.7 27.9 7.4 575 63.8 21.5
0.4776 49.6804 6.4 9.7 27.9 7.4 575 63.8 21.4
0.4977 49.6804 6.4 9.7 28 7.5 575 63.8 21.5
0.5177 49.6804 6.4 9.7 28 7.5 575 63.8 21.9
0.5377 49.6804 6.4 9.7 28 7.5 575 63.8 22.2
0.5577 49.6804 6.4 9.7 28.1 7.5 575 63.8 22.3
0.5778 49.6804 6.4 9.7 28.1 7.6 575 63.7 22.6
0.5978 49.6804 6.4 9.7 28.1 7.6 575 63.7 22.7
0.6178 49.6804 6.4 9.6 28.2 7.6 575 63.7 22.7
0.6379 49.6804 6.4 9.6 28.2 7.6 575 63.7 22.7
0.6579 49.6804 6.4 9.6 28.2 7.6 575 63.7 23.1
0.6779 49.6804 6.4 9.6 28.2 7.7 575 63.7 23.8
0.698 49.6804 6.4 9.6 28.3 7.7 575 63.7 24.2
0.718 49.6804 6.4 9.6 28.3 7.7 575 63.7 24.1
0.738 49.6804 6.4 9.6 28.4 7.7 575 63.6 23.9
0.7581 49.6804 6.4 9.6 28.4 7.8 575 63.6 24.1
0.7781 49.6804 6.4 9.6 28.4 7.8 575 63.6 24.4
0.7981 49.6804 6.4 9.6 28.5 7.8 575 63.6 24.6
0.8182 49.6804 6.4 9.6 28.5 7.8 575 63.6 24.7
0.8382 49.6804 6.4 9.6 28.5 7.9 575 63.6 24.7
0.8582 49.6804 6.4 9.6 28.5 7.9 575 63.6 24.7
0.8782 49.6804 6.4 9.6 28.5 7.9 575 63.6 24.8
0.8983 49.6804 6.4 9.6 28.4 7.8 575 63.6 24.8
0.9183 49.6804 6.4 9.6 28.4 7.8 575 63.6 24.8
0.9383 49.6804 6.4 9.6 28.4 7.7 575 63.6 24.8
0.9584 49.6804 6.4 9.6 28.3 7.7 575 63.6 25
0.9784 49.6804 6.4 9.6 28.3 7.6 575 63.6 25
0.9984 49.6804 6.4 9.7 28.2 7.6 575 63.6 24.4
1.0185 49.6804 6.4 9.7 28.2 7.6 600 63.6 23.6
1.0385 49.6804 6.4 9.7 28.1 7.5 600 63.5 23.1
1.0585 49.6804 6.4 9.7 28.1 7.5 600 63.5 22.8
1.0786 49.6804 6.4 9.7 28.1 7.4 600 63.5 22.4
1.0986 49.6804 6.4 9.7 28 7.4 600 63.5 22.3
1.1186 49.6804 6.4 9.6 28 7.4 600 63.5 21.9
1.1387 49.6804 6.4 9.6 28 7.4 600 63.5 21.5
1.1587 49.6804 6.4 9.6 28 7.4 600 63.5 21.3
1.1787 49.6804 6.4 9.6 28.1 7.5 600 63.5 21.2
1.1987 49.6804 6.4 9.6 28.1 7.5 600 63.5 21.1
1.2188 49.6804 6.4 9.6 28.1 7.5 600 63.5 21.1
1.2388 49.6804 6.4 9.6 28.1 7.5 600 63.5 21.1
1.2588 49.6804 6.4 9.6 28.1 7.5 600 63.5 21.1
1.2789 49.6804 6.4 9.6 28.2 7.5 600 63.5 21.1
1.2989 49.6804 6.4 9.6 28.2 7.5 600 63.5 21.1
1.3189 49.6804 6.4 9.6 28.2 7.5 600 63.4 21
1.339 49.6804 6.4 9.6 28.2 7.5 600 63.4 21
1.359 49.6804 6.5 9.6 28.2 7.5 600 63.4 21
1.379 49.6804 6.5 9.6 28.2 7.5 600 63.4 21
1.3991 49.6804 6.5 9.6 28.1 7.5 600 63.4 20.9
1.4191 49.6804 6.5 9.5 28.1 7.5 600 63.4 21
1.4391 49.6804 6.5 9.5 28.1 7.5 600 63.4 21.1
1.4592 49.6804 6.5 9.5 28.2 7.5 600 63.4 21.2
1.4792 49.6804 6.5 9.5 28.2 7.5 600 63.4 21.4
1.4992 49.6804 6.5 9.5 28.2 7.6 600 63.4 21.8
1.5192 49.6804 6.5 9.5 28.2 7.6 594 63.4 22.2
1.5393 49.6804 6.5 9.5 28.3 7.6 593 63.4 22.4
1.5593 49.6804 6.5 9.5 28.3 7.6 576 63.3 22.4
1.5793 49.6804 6.5 9.5 28.3 7.6 600 63.3 22.4
1.5994 49.6804 6.5 9.5 28.3 7.6 600 63.3 22.6
1.6194 49.6804 6.5 9.5 28.3 7.7 600 63.3 22.9
1.6394 49.6804 6.5 9.5 28.4 7.7 600 63.3 23.1
1.6595 49.6804 6.5 9.5 28.4 7.7 600 63.3 23.3
1.6795 49.6804 6.5 9.5 28.4 7.8 593 63.2 23.5
1.6995 49.6804 6.5 9.5 28.4 7.8 592 63.2 23.8
1.7196 49.6804 6.5 9.5 28.4 7.9 575 63.2 24.1
1.7396 49.6804 6.5 9.5 28.5 7.9 575 63.2 24.5
1.7596 49.6804 6.5 9.4 28.6 8 575 63.2 25.1
1.7797 49.6804 6.5 9.4 28.6 8.1 575 63.1 25.8
1.7997 49.6804 6.5 9.4 28.7 8.1 575 63.1 26.6
1.8197 49.6804 6.5 9.4 28.8 8.3 575 63 27.2
1.8397 49.6804 6.5 9.4 28.8 8.3 575 63 27.7
1.8598 49.6804 6.5 9.5 28.9 8.4 545 63 28.2
1.8798 49.6804 6.5 9.5 28.9 8.4 525 63 29
1.8998 49.6804 6.6 9.6 29 8.4 525 62.9 29.7
1.9199 49.6804 6.6 9.7 29 8.5 525 62.9 30.4
1.9399 49.6804 6.6 9.7 29.1 8.5 525 62.9 31
1.9599 49.6804 6.6 9.8 29.1 8.5 525 62.8 31.6
1.98 49.6804 6.6 9.9 29.2 8.6 525 62.8 32.5
2 49.6804 6.6 9.9 29.3 8.6 525 62.7 33.8
-10.8 49.7004 6.3 10.1 31.5 8.6 550 58.4 25.1
-10.78 49.7004 6.3 10.1 31.5 8.6 550 58.5 25.5
-10.7599 49.7004 6.3 10.1 31.5 8.6 550 58.6 26.2
-10.7399 49.7004 6.3 10.1 31.4 8.6 550 58.6 27.1
-10.7199 49.7004 6.3 10.2 31.4 8.5 550 58.6 27.4
-10.6998 49.7004 6.3 10.2 31.4 8.5 550 58.5 27.6
-10.6798 49.7004 6.3 10.2 31.4 8.5 550 58.5 27.8
-10.6598 49.7004 6.3 10.2 31.3 8.4 550 58.5 28
-10.6397 49.7004 6.3 10.2 31.3 8.4 560 58.5 28.4
-10.6197 49.7004 6.3 10.2 31.3 8.4 575 58.4 28.8
-10.5997 49.7004 6.3 10.2 31.4 8.5 575 58.4 29.2
-10.5797 49.7004 6.3 10.2 31.6 8.7 575 58.4 29.5
-10.5596 49.7004 6.3 10.2 31.7 8.8 575 58.4 29.5
-10.5396 49.7004 6.3 10.2 31.8 8.9 560 58.4 29.2
-10.5196 49.7004 6.3 10.2 31.9 9 560 58.4 28.9
-10.4995 49.7004 6.3 10.2 32 9.1 560 58.3 29.2
-10.4795 49.7004 6.3 10.1 32.1 9.1 560 58.3 30.1
-10.4595 49.7004 6.3 10.1 32.2 9.2 560 58.3 30.8
-10.4394 49.7004 6.3 10.1 32.3 9.3 560 58.3 31.1
-10.4194 49.7004 6.3 10.1 32.4 9.3 560 58.3 31.3
-10.3994 49.7004 6.3 10.1 32.5 9.4 560 58.3 31.8
-10.3793 49.7004 6.3 10.1 32.6 9.5 560 58.2 32.7
-10.3593 49.7004 6.3 10.1 32.6 9.5 552 58.2 33.7
-10.3393 49.7004 6.3 10.1 32.7 9.6 574 58.2 34.8
-10.3192 49.7004 6.3 10.1 32.7 9.7 575 58.2 35.8
-10.2992 49.7004 6.3 10.1 32.8 9.7 575 58.2 37
-10.2792 49.7004 6.3 10.2 32.8 9.8 575 58.2 38.1
-10.2592 49.7004 6.3 10.2 32.9 9.8 575 58.1 39.4
-10.2391 49.7004 6.3 10.2 32.9 9.9 575 58.1 40.6
-10.2191 49.7004 6.3 10.2 33 9.9 575 58.1 41.3
-10.1991 49.7004 6.3 10.2 33.1 10 575 58.1 41.9
-10.179 49.7004 6.3 10.2 33.1 10 575 58 42
-10.159 49.7004 6.3 10.2 33.2 10 575 58 41
-10.139 49.7004 6.3 10.2 33.2 10 575 58 39.5
-10.1189 49.7004 6.3 10.2 33.2 10.1 575 58.1 38.4
-10.0989 49.7004 6.3 10.2 33.3 10.1 575 58.5 38
-10.0789 49.7004 6.3 10.2 33.3 10.1 586 58.9 37.6
-10.0588 49.7004 6.2 10.2 33.3 10.1 600 59.1 37.4
-10.0388 49.7004 6.2 10.2 33.3 10 600 59 37.6
-10.0188 49.7004 6.2 10.2 33.3 10 600 58.9 37.5
-9.9987 49.7004 6.2 10.2 33.3 10 600 58.9 37.3
-9.9787 49.7004 6.2 10.2 33.3 10 600 58.8 37.1
-9.9587 49.7004 6.2 10.2 33.4 10 600 58.7 37
-9.9387 49.7004 6.2 10.3 33.4 10 600 59.3 37
-9.9186 49.7004 6.2 10.3 33.4 10 600 59.9 36.9
-9.8986 49.7004 6.2 10.3 33.4 10 600 60.3 36.9
-9.8786 49.7004 6.2 10.3 33.4 10 600 60.3 36.9
-9.8585 49.7004 6.2 10.3 33.4 10 600 60.2 36.7
-9.8385 49.7004 6.2 10.3 33.4 10 600 60.1 36.3
-9.8185 49.7004 6.2 10.3 33.4 9.9 600 60.1 35.6
-9.7984 49.7004 6.2 10.3 33.4 9.9 624 60 35
-9.7784 49.7004 6.2 10.3 33.4 9.9 625 60 34.5
-9.7584 49.7004 6.2 10.3 33.4 9.9 625 59.9 34.1
-9.7383 49.7004 6.2 10.3 33.4 9.8 625 59.9 33.6
-9.7183 49.7004 6.2 10.3 33.4 9.8 625 59.8 33.1
-9.6983 49.7004 6.2 10.3 33.4 9.8 625 59.8 32.7
-9.6782 49.7004 6.2 10.3 33.3 9.7 625 59.8 32.8
-9.6582 49.7004 6.2 10.3 33.3 9.7 625 59.7 33.5
-9.6382 49.7004 6.2 10.3 33.3 9.7 625 59.7 33.9
-9.6182 49.7004 6.2 10.3 33.2 9.6 625 59.7 33.8
-9.5981 49.7004 6.2 10.3 33.1 9.6 625 59.7 33.7
-9.5781 49.7004 6.2 10.4 33 9.5 625 59.7 33.7
-9.5581 49.7004 6.2 10.4 32.9 9.5 625 59.6 33.6
-9.538 49.7004 6.2 10.4 32.9 9.5 625 59.6 33.6
-9.518 49.7004 6.2 10.4 32.9 9.5 625 59.6 33.9
-9.498 49.7004 6.2 10.4 32.9 9.5 625 59.6 33.9
-9.4779 49.7004 6.2 10.4 32.9 9.5 625 59.6 33.7
-9.4579 49.7004 6.2 10.4 32.8 9.5 625 59.6 34
-9.4379 49.7004 6.2 10.4 32.8 9.6 625 59.5 33.7
-9.4178 49.7004 6.2 10.4 32.8 9.6 625 59.5 33
-9.3978 49.7004 6.2 10.4 32.8 9.6 625 59.5 32.8
-9.3778 49.7004 6.2 10.4 32.8 9.6 625 59.5 33.3
-9.3577 49.7004 6.2 10.4 32.8 9.6 625 59.5 33.9
-9.3377 49.7004 6.2 10.4 32.7 9.6 625 59.5 34.2
-9.3177 49.7004 6.2 10.4 32.6 9.6 625 59.6 34
-9.2977 49.7004 6.2 10.4 32.6 9.6 625 59.6 33.9
-9.2776 49.7004 6.2 10.4 32.5 9.6 625 59.7 33.9
-9.2576 49.7004 6.2 10.4 32.5 9.6 625 59.8 33.9
-9.2376 49.7004 6.2 10.4 32.5 9.6 625 59.8 33.7
-9.2175 49.7004 6.2 10.4 32.5 9.6 625 59.8 34.3
-9.1975 49.7004 6.2 10.4 32.4 9.6 625 59.8 34.9
-9.1775 49.7004 6.2 10.4 32.4 9.6 625 59.9 35.4
-9.1574 49.7004 6.2 10.4 32.4 9.6 625 59.9 36.1
-9.1374 49.7004 6.2 10.4 32.4 9.6 625 59.9 36.8
-9.1174 49.7004 6.2 10.4 32.3 9.6 625 59.9 37.4
-9.0973 49.7004 6.2 10.4 32.3 9.6 625 59.8 38
-9.0773 49.7004 6.2 10.4 32.3 9.6 625 59.8 38.3
-9.0573 49.7004 6.2 10.4 32.2 9.6 625 59.8 38.1
-9.0372 49.7004 6.2 10.4 32.2 9.6 625 59.7 37.1
-9.0172 49.7004 6.2 10.4 32.1 9.6 625 59.7 36.3
-8.9972 49.7004 6.2 10.4 32.1 9.6 625 59.6 35.8
-8.9772 49.7004 6.2 10.4 32 9.6 625 59.4 35.3
-8.9571 49.7004 6.2 10.4 32 9.6 625 59.2 34.8
-8.9371 49.7004 6.2 10.4 31.9 9.5 625 58.9 35.1
-8.9171 49.7004 6.2 10.4 31.9 9.5 625 58.6 35.3
-8.897 49.7004 6.2 10.4 31.8 9.5 625 58.9 35.4
-8.877 49.7004 6.2 10.3 31.8 9.5 625 61.6 36.2
-8.857 49.7004 6.2 10.3 31.8 9.5 625 60.9 36.3
-8.8369 49.7004 6.2 10.3 31.7 9.4 625 60.3 36.7
-8.8169 49.7004 6.2 10.3 31.8 9.5 625 60.7 37.8
-8.7969 49.7004 6.2 10.3 31.8 9.5 625 63.7 39.7
-8.7768 49.7004 6.1 10.3 31.9 9.6 625 65.2 40.9
-8.7568 49.7004 6.1 10.3 32 9.6 625 64.9 41.6
-8.7368 49.7004 6.1 10.3 32 9.7 625 64.5 42.4
-8.7167 49.7004 6.1 10.3 32 9.7 625 64.2 43.8
-8.6967 49.7004 6.1 10.3 32.1 9.8 625 63.9 46
-8.6767 49.7004 6.1 10.2 32.1 9.8 600 63.5 48.4
-8.6567 49.7004 6.1 10.2 32.1 9.9 600 63.3 51.7
-8.6366 49.7004 6.1 10.2 32.1 10 600 63.1 55.1
-8.6166 49.7004 6.1 10.2 32.2 10 600 62.9 58.5
-8.5966 49.7004 6.1 10.2 32.2 10.1 600 62.9 62
-8.5765 49.7004 6.1 10.2 32.2 10.2 600 62.8 65.8
-8.5565 49.7004 6.1 10.2 32.2 10.2 600 62.8 68.9
-8.5365 49.7004 6.1 10.2 32.2 10.2 600 62.8 70.2
-8.5164 49.7004 6.1 10.2 32.1 10.2 600 62.8 71.2
-8.4964 49.7004 6.1 10.2 32.1 10.2 600 62.9 70.5
-8.4764 49.7004 6.1 10.2 32 10.2 600 63 68.1
-8.4563 49.7004 6.1 10.2 32 10.1 600 63.2 66
-8.4363 49.7004 6.1 10.2 31.9 10.1 600 63.5 64.2
-8.4163 49.7004 6.1 10.2 31.8 10 600 64.1 62
-8.3962 49.7004 6.1 10.2 31.7 10 600 64.4 59.6
-8.3762 49.7004 6.1 10.2 31.7 10 600 61.5 56.5
-8.3562 49.7004 6.1 10.2 31.6 9.9 600 58.6 53.3
-8.3362 49.7004 6.1 10.2 31.6 9.9 600 56.9 50.9
-8.3161 49.7004 6.1 10.2 31.5 9.8 600 57 49.8
-8.2961 49.7004 6.1 10.2 31.4 9.8 600 57.6 48.8
-8.2761 49.7004 6.1 10.2 31.3 9.8 600 57.9 47.9
-8.256 49.7004 6.1 10.2 31.3 9.7 600 58.1 47.2
-8.236 49.7004 6.1 10.2 31.2 9.7 600 58.2 46.5
-8.216 49.7004 6.1 10.2 31.1 9.6 600 58.4 45.5
-8.1959 49.7004 6.1 10.2 31 9.6 600 58.5 44.2
-8.1759 49.7004 6.1 10.2 30.9 9.5 600 58.6 42.9
-8.1559 49.7004 6.1 10.2 30.8 9.5 600 58.7 42.4
-8.1358 49.7004 6.1 10.2 30.8 9.4 600 58.8 42.3
-8.1158 49.7004 6.1 10.2 30.7 9.4 600 58.9 42.2
-8.0958 49.7004 6.1 10.2 30.6 9.4 600 58.9 41.9
-8.0757 49.7004 6.1 10.1 30.6 9.3 600 59 41.2
-8.0557 49.7004 6.1 10.1 30.5 9.3 600 59.1 40.5
-8.0357 49.7004 6.1 10.1 30.5 9.2 600 59.2 39.8
-8.0156 49.7004 6.1 10.1 30.4 9.2 600 59.3 39.1
-7.9956 49.7004 6.1 10.1 30.3 9.1 600 59 38.7
-7.9756 49.7004 6.1 10.1 30.3 9.1 600 58.4 38.7
-7.9556 49.7004 6.1 10.2 30.3 9.1 600 58.3 38.8
-7.9355 49.7004 6.1 10.2 30.2 9.1 600 58.4 38.4
-7.9155 49.7004 6.1 10.2 30.2 9.1 600 58.2 37.8
-7.8955 49.7004 6.1 10.2 30.2 9.1 600 58.1 37.5
-7.8754 49.7004 6.1 10.2 30.1 9.2 600 58.4 37.9
-7.8554 49.7004 6.1 10.2 30.1 9.2 614 58.9 38.2
-7.8354 49.7004 6.1 10.2 30.1 9.2 625 58.9 38.5
-7.8153 49.7004 6.1 10.2 30 9.2 625 58.5 39.1
-7.7953 49.7004 6.1 10.2 30 9.1 625 58.4 39.8
-7.7753 49.7004 6.1 10.2 29.9 9.1 625 58.6 40.3
-7.7552 49.7004 6.1 10.2 29.9 9.1 625 58.1 40.8
-7.7352 49.7004 6.1 10.2 29.8 9.1 625 58.1 41.6
-7.7152 49.7004 6.1 10.2 29.8 9.1 625 59.9 43.8
-7.6951 49.7004 6.1 10.2 29.8 9.1 625 63.1 47.1
-7.6751 49.7004 6.1 10.2 29.8 9.2 625 64.1 49.3
-7.6551 49.7004 6.1 10.2 29.8 9.2 625 63.7 49.7
-7.6351 49.7004 6.1 10.2 29.8 9.2 625 63.3 49.6
-7.615 49.7004 6.1 10.1 29.9 9.3 625 62.8 49.6
-7.595 49.7004 6.1 10.1 29.9 9.3 624 62.4 51.2
-7.575 49.7004 6.1 10.1 29.9 9.4 600 62.7 52.9
-7.5549 49.7004 6.1 10.1 29.9 9.4 600 64.6 55.1
-7.5349 49.7004 6.1 10.1 29.9 9.4 600 64.6 56.7
-7.5149 49.7004 6.1 10.1 29.9 9.5 600 64.1 58.3
-7.4948 49.7004 6.1 10.1 29.9 9.5 600 63.8 59.8
-7.4748 49.7004 6.1 10.1 29.9 9.5 600 63.7 61.3
-7.4548 49.7004 6.1 10.1 29.9 9.6 600 63.5 62.5
-7.4347 49.7004 6.1 10.1 29.9 9.6 600 63.4 64.4
-7.4147 49.7004 6.1 10.1 29.9 9.5 600 63.4 66.4
-7.3947 49.7004 6.1 10.1 29.8 9.5 600 63.2 67.6
-7.3746 49.7004 6.1 10.1 29.8 9.5 600 63.2 67.5
-7.3546 49.7004 6.1 10.2 29.7 9.4 600 63.2 67.3
-7.3346 49.7004 6.1 10.2 29.7 9.4 600 63.1 67.9
-7.3146 49.7004 6.1 10.2 29.6 9.4 600 63.1 67.8
-7.2945 49.7004 6.1 10.2 29.6 9.3 600 63.1 68.2
-7.2745 49.7004 6.1 10.2 29.6 9.3 600 63.1 68.4
-7.2545 49.7004 6.1 10.2 29.5 9.3 600 63.1 67.3
-7.2344 49.7004 6.1 10.2 29.6 9.3 600 63.1 66.2
-7.2144 49.7004 6.1 10.2 29.6 9.3 600 63.1 65.1
-7.1944 49.7004 6.1 10.2 29.6 9.3 600 63.2 63.8
-7.1743 49.7004 6.1 10.2 29.6 9.3 600 63.2 62.3
-7.1543 49.7004 6.1 10.2 29.6 9.3 600 63.2 60.8
-7.1343 49.7004 6.1 10.2 29.4 9.2 600 63.2 59.5
-7.1142 49.7004 6.1 10.2 29.3 9 600 63.2 58.2
-7.0942 49.7004 6.1 10.2 29.2 8.9 600 63.3 55.9
-7.0742 49.7004 6.1 10.3 29.2 8.8 600 63.3 53.4
-7.0541 49.7004 6.1 10.3 29.1 8.7 600 63.3 50.8
-7.0341 49.7004 6.1 10.3 29 8.6 605 63.4 47.7
-7.0141 49.7004 6.1 10.3 28.9 8.4 650 63.4 45
-6.9941 49.7004 6.1 10.3 28.8 8.3 650 63.4 42.6
-6.974 49.7004 6.1 10.3 28.7 8.2 650 63.4 40.7
-6.954 49.7004 6.1 10.3 28.7 8.2 650 63.5 38.6
-6.934 49.7004 6.1 10.3 28.7 8.1 650 63.5 37
-6.9139 49.7004 6.1 10.3 28.7 8.1 650 63.5 35.7
-6.8939 49.7004 6.1 10.3 28.7 8.1 650 63.5 34.4
-6.8739 49.7004 6.1 10.3 28.8 8.1 650 63.5 34.2
-6.8538 49.7004 6.1 10.3 28.9 8.1 650 63.5 34.6
-6.8338 49.7004 6.1 10.3 29 8.2 650 63.5 35.2
-6.8138 49.7004 6.1 10.3 29.1 8.3 650 63.5 35.5
-6.7937 49.7004 6.1 10.3 29.2 8.3 650 63.5 35.5
-6.7737 49.7004 6.1 10.3 29.3 8.4 650 63.5 35.5
-6.7537 49.7004 6.1 10.3 29.4 8.4 635 63.5 35.9
-6.7336 49.7004 6.1 10.3 29.5 8.5 625 63.6 36.1
-6.7136 49.7004 6.1 10.3 29.6 8.5 625 63.6 36.2
-6.6936 49.7004 6.1 10.3 29.6 8.5 625 63.6 36.4
-6.6736 49.7004 6.1 10.3 29.6 8.5 625 63.6 36.2
-6.6535 49.7004 6.1 10.3 29.6 8.4 625 63.6 35.9
-6.6335 49.7004 6.1 10.3 29.6 8.4 625 63.6 35.4
-6.6135 49.7004 6.1 10.3 29.6 8.3 625 63.6 34.4
-6.5934 49.7004 6.1 10.3 29.6 8.3 625 63.7 33.5
-6.5734 49.7004 6.1 10.3 29.5 8.2 625 63.8 32.5
-6.5534 49.7004 6.1 10.3 29.5 8.2 625 63.8 31.5
-6.5333 49.7004 6.1 10.3 29.5 8.2 625 63.8 30.4
-6.5133 49.7004 6.1 10.3 29.5 8.1 625 63.9 29.3
-6.4933 49.7004 6.1 10.3 29.5 8.1 625 64 28.3
-6.4732 49.7004 6.1 10.3 29.5 8 625 64 27.5
-6.4532 49.7004 6.1 10.3 29.5 8 625 64.2 26.6
-6.4332 49.7004 6.1 10.3 29.4 7.9 625 64.2 25.9
-6.4131 49.7004 6.1 10.3 29.3 7.7 625 64.3 25.3
-6.3931 49.7004 6.1 10.3 29.2 7.6 625 64.4 24.7
-6.3731 49.7004 6.1 10.3 29 7.5 625 64.5 24.2
-6.3531 49.7004 6.1 10.3 28.9 7.4 625 64.6 23.8
-6.333 49.7004 6.1 10.4 28.8 7.3 625 64.6 23.3
-6.313 49.7004 6.1 10.4 28.8 7.2 625 64.7 23
-6.293 49.7004 6.1 10.4 28.7 7.1 625 64.9 22.7
-6.2729 49.7004 6.1 10.4 28.6 7 625 65 22.3
-6.2529 49.7004 6.1 10.4 28.5 6.9 625 65.1 21.8
-6.2329 49.7004 6.1 10.4 28.4 6.8 625 65.2 21.4
-6.2128 49.7004 6.1 10.4 28.3 6.7 625 65.3 21
-6.1928 49.7004 6.1 10.4 28.3 6.6 641 65.4 20.7
-6.1728 49.7004 6.1 10.4 28.2 6.6 650 65.4 20.3
-6.1527 49.7004 6.1 10.4 28.1 6.5 650 65.6 20
-6.1327 49.7004 6.1 10.4 28.1 6.5 650 65.7 19.6
-6.1127 49.7004 6.1 10.4 28.1 6.5 650 65.9 19.4
-6.0926 49.7004 6.1 10.5 28 6.4 650 66.1 19.1
-6.0726 49.7004 6.1 10.5 28 6.4 650 66.2 19
-6.0526 49.7004 6.1 10.5 27.9 6.4 650 66.4 18.9
-6.0326 49.7004 6.1 10.5 27.9 6.4 650 66.7 18.9
-6.0125 49.7004 6.1 10.4 27.9 6.4 650 66.9 18.9
-5.9925 49.7004 6.1 10.4 28 6.5 650 66 18.8
-5.9725 49.7004 6.1 10.4 28 6.5 650 65 18.7
-5.9524 49.7004 6.1 10.4 28 6.5 650 65.4 18.8
-5.9324 49.7004 6.1 10.4 28 6.5 643 65.7 19
-5.9124 49.7004 6.1 10.4 28 6.6 600 66.1 19.2
-5.8923 49.7004 6.1 10.4 28 6.6 600 66.3 19.4
-5.8723 49.7004 6.1 10.4 28 6.6 600 66.5 19.6
-5.8523 49.7004 6.1 10.4 28.1 6.7 600 66.7 19.7
-5.8322 49.7004 6.1 10.4 28.1 6.7 600 67 20
-5.8122 49.7004 6.1 10.4 28.2 6.8 600 67.3 20.2
-5.7922 49.7004 6.1 10.4 28.2 6.8 610 67.8 20.4
-5.7721 49.7004 6.1 10.4 28.2 6.8 610 68 20.6
-5.7521 49.7004 6.1 10.4 28.2 6.8 610 65 20
-5.7321 49.7004 6.1 10.4 28.1 6.9 610 61.5 19.4
-5.7121 49.7004 6.1 10.4 28.1 6.9 610 59.6 19.1
-5.692 49.7004 6.1 10.4 28.1 6.9 610 59.9 18.9
-5.672 49.7004 6.1 10.4 28 6.9 610 60.3 18.8
-5.652 49.7004 6.1 10.4 28 6.9 610 60.6 18.7
-5.6319 49.7004 6.1 10.4 27.9 6.9 595 60.9 18.7
-5.6119 49.7004 6.1 10.4 27.9 6.8 595 61.1 18.7
-5.5919 49.7004 6.1 10.4 27.8 6.8 595 61.4 18.8
-5.5718 49.7004 6.1 10.4 27.8 6.8 595 62 18.9
-5.5518 49.7004 6.1 10.4 27.7 6.8 595 62.3 19
-5.5318 49.7004 6.1 10.4 27.7 6.7 595 62.5 19.1
-5.5117 49.7004 6.1 10.4 27.6 6.7 595 62.7 19.2
-5.4917 49.7004 6.1 10.4 27.6 6.7 595 62.7 19.3
-5.4717 49.7004 6.1 10.4 27.5 6.7 595 62.3 19.3
-5.4516 49.7004 6.1 10.4 27.5 6.6 595 61.8 19.2
-5.4316 49.7004 6.1 10.4 27.5 6.6 625 61.9 19.3
-5.4116 49.7004 6.1 10.4 27.4 6.6 625 62 19.3
-5.3915 49.7004 6.1 10.4 27.4 6.6 625 62.2 19.3
-5.3715 49.7004 6.1 10.4 27.3 6.5 611 62.2 19.2
-5.3515 49.7004 6.1 10.4 27.3 6.5 560 62.4 19.3
-5.3315 49.7004 6.1 10.4 27.3 6.6 560 62.5 19.4
-5.3114 49.7004 6.1 10.4 27.3 6.6 560 62.3 19.4
-5.2914 49.7004 6.1 10.4 27.3 6.6 568 62 19.4
-5.2714 49.7004 6.1 10.4 27.2 6.6 575 62 19.5
-5.2513 49.7004 6.1 10.4 27.2 6.6 575 62.1 19.5
-5.2313 49.7004 6.1 10.4 27.2 6.6 575 62.3 19.6
-5.2113 49.7004 6.2 10.4 27.2 6.7 575 62.4 19.5
-5.1912 49.7004 6.2 10.3 27 6.6 575 62.5 19.5
-5.1712 49.7004 6.2 10.3 27 6.5 575 62.7 19.4
-5.1512 49.7004 6.2 10.3 26.9 6.5 575 62.8 19.2
-5.1311 49.7004 6.2 10.3 26.8 6.5 575 62.9 19
-5.1111 49.7004 6.2 10.3 26.8 6.4 575 62.7 18.7
-5.0911 49.7004 6.2 10.3 26.7 6.4 575 62.7 18.4
-5.071 49.7004 6.2 10.3 26.6 6.3 575 62.8 18.2
-5.051 49.7004 6.2 10.3 26.5 6.3 575 62.9 18
-5.031 49.7004 6.2 10.4 26.5 6.2 575 63 17.8
-5.011 49.7004 6.2 10.4 26.4 6.2 575 63.1 17.7
-4.9909 49.7004 6.2 10.4 26.3 6.1 575 63.1 17.5
-4.9709 49.7004 6.2 10.4 26.2 6.1 575 63.2 17.4
-4.9509 49.7004 6.2 10.4 26.1 6 575 63.3 17.4
-4.9308 49.7004 6.2 10.4 26 5.9 575 63.4 17.3
-4.9108 49.7004 6.2 10.4 26 5.9 575 63.5 17.3
-4.8908 49.7004 6.2 10.4 25.9 5.9 575 63.7 17.4
-4.8707 49.7004 6.2 10.4 25.8 5.8 575 64 17.4
-4.8507 49.7004 6.2 10.4 25.7 5.7 575 64.3 17.2
-4.8307 49.7004 6.2 10.4 25.6 5.7 575 64.4 16.9
-4.8106 49.7004 6.2 10.4 25.5 5.7 558 64.5 16.8
-4.7906 49.7004 6.2 10.4 25.5 5.7 500 64.5 16.8
-4.7706 49.7004 6.2 10.3 25.4 5.7 500 64.5 16.8
-4.7505 49.7004 6.2 10.3 25.4 5.7 500 64.3 16.7
-4.7305 49.7004 6.2 10.3 25.4 5.7 500 64.2 16.7
-4.7105 49.7004 6.2 10.3 25.3 5.6 500 64.3 16.8
-4.6905 49.7004 6.2 10.3 25.3 5.6 500 64.3 16.8
-4.6704 49.7004 6.2 10.3 25.2 5.6 500 64.4 16.8
-4.6504 49.7004 6.2 10.2 25.1 5.6 500 64.4 16.8
-4.6304 49.7004 6.2 10.2 25 5.6 500 64.5 16.8
-4.6103 49.7004 6.2 10.2 25 5.6 500 64.5 16.8
-4.5903 49.7004 6.2 10.2 24.9 5.6 500 64.6 16.8
-4.5703 49.7004 6.2 10.2 24.8 5.6 500 64.6 16.7
-4.5502 49.7004 6.2 10.2 24.8 5.6 500 64.7 16.6
-4.5302 49.7004 6.2 10.2 24.7 5.5 481 64.6 16.6
-4.5102 49.7004 6.2 10.2 24.7 5.5 475 64.5 16.6
-4.4901 49.7004 6.2 10.2 24.6 5.5 475 64.4 16.6
-4.4701 49.7004 6.2 10.2 24.6 5.5 475 64.4 16.6
-4.4501 49.7004 6.2 10.2 24.6 5.5 475 64.4 16.6
-4.43 49.7004 6.2 10.2 24.5 5.5 475 64.5 16.8
-4.41 49.7004 6.2 10.2 24.5 5.4 475 64.6 16.8
-4.39 49.7004 6.2 10.2 24.5 5.4 475 64.6 16.9
-4.37 49.7004 6.2 10.2 24.4 5.5 475 64.7 17
-4.3499 49.7004 6.2 10.2 24.4 5.5 475 64.8 17.2
-4.3299 49.7004 6.3 10.2 24.3 5.5 475 64.8 17.3
-4.3099 49.7004 6.3 10.2 24.3 5.5 475 64.9 17.5
-4.2898 49.7004 6.3 10.2 24.2 5.5 475 64.9 17.6
-4.2698 49.7004 6.3 10.2 24.2 5.5 475 65 17.8
-4.2498 49.7004 6.3 10.2 24.1 5.5 468 65 18
-4.2297 49.7004 6.3 10.2 24.1 5.5 450 65.1 18.3
-4.2097 49.7004 6.3 10.2 24 5.5 450 65.1 18.6
-4.1897 49.7004 6.3 10.2 23.9 5.5 450 65.2 18.8
-4.1696 49.7004 6.3 10.2 23.9 5.5 450 65.2 19.2
-4.1496 49.7004 6.3 10.2 23.8 5.6 450 65.4 19.5
-4.1296 49.7004 6.3 10.2 23.8 5.6 450 65.6 20
-4.1095 49.7004 6.3 10.2 23.7 5.6 450 65.9 20.4
-4.0895 49.7004 6.3 10.1 23.7 5.6 450 66 20.9
-4.0695 49.7004 6.3 10.1 23.7 5.6 450 66 21.6
-4.0495 49.7004 6.3 10.1 23.8 5.6 450 66.1 22.3
-4.0294 49.7004 6.3 10.1 23.8 5.6 450 66.2 22.8
-4.0094 49.7004 6.3 10.1 23.7 5.6 450 66.2 23.5
-3.9894 49.7004 6.3 10 23.7 5.7 450 66.3 24.2
-3.9693 49.7004 6.3 10 23.7 5.7 411 66.3 25.2
-3.9493 49.7004 6.3 10 23.7 5.8 400 66.4 26.2
-3.9293 49.7004 6.3 10 23.6 5.8 400 66.5 26.8
-3.9092 49.7004 6.3 10 23.6 5.8 400 66.9 27.1
-3.8892 49.7004 6.3 10 23.6 5.9 400 67.2 27.6
-3.8692 49.7004 6.3 10 23.6 5.9 400 67.2 27.7
-3.8491 49.7004 6.4 10 23.6 6 400 67.2 27.5
-3.8291 49.7004 6.4 10 23.5 6 400 67.2 27.6
-3.8091 49.7004 6.4 9.9 23.5 6 400 67.2 27.8
-3.789 49.7004 6.4 9.9 23.5 6 400 67.4 28
-3.769 49.7004 6.4 9.9 23.4 6 400 67.7 28.3
-3.749 49.7004 6.4 9.9 23.4 6 400 67.8 28.4
-3.729 49.7004 6.4 10 23.3 5.9 400 67.8 28.6
-3.7089 49.7004 6.4 10 23.2 5.9 426 67.9 28.9
-3.6889 49.7004 6.4 10 23.1 5.9 500 67.9 28.9
-3.6689 49.7004 6.4 10.1 23 5.8 500 68 28.7
-3.6488 49.7004 6.4 10.1 22.9 5.8 500 68 28.5
-3.6288 49.7004 6.4 10.1 22.8 5.8 500 68.1 28.4
-3.6088 49.7004 6.4 10.1 22.7 5.7 500 68.1 28.3
-3.5887 49.7004 6.4 10.2 22.6 5.7 500 68.1 28.1
-3.5687 49.7004 6.4 10.2 22.5 5.7 500 68.2 27.8
-3.5487 49.7004 6.4 10.2 22.4 5.7 500 68.2 27.4
-3.5286 49.7004 6.4 10.2 22.4 5.6 500 68.2 27.1
-3.5086 49.7004 6.4 10.2 22.3 5.6 500 68.2 26.7
-3.4886 49.7004 6.4 10.2 22.3 5.6 500 68.2 26.3
-3.4685 49.7004 6.4 10.2 22.3 5.5 500 68.2 25.8
-3.4485 49.7004 6.4 10.1 22.2 5.5 500 68.2 25.2
-3.4285 49.7004 6.4 10.1 22.2 5.5 500 68.5 24.8
-3.4085 49.7004 6.4 10.1 22.2 5.4 397 69.2 24.6
-3.3884 49.7004 6.4 10 22.1 5.4 375 70 24.3
-3.3684 49.7004 6.4 10 22.1 5.4 375 70.3 24
-3.3484 49.7004 6.4 10 22.1 5.3 375 70.2 23.8
-3.3283 49.7004 6.4 10 22.1 5.3 375 70.2 23.6
-3.3083 49.7004 6.5 9.9 22 5.3 375 70.1 23.6
-3.2883 49.7004 6.5 9.9 22 5.2 375 70.1 23.6
-3.2682 49.7004 6.5 9.9 21.9 5.2 375 70 23.7
-3.2482 49.7004 6.5 9.9 21.8 5.1 375 69.9 24.6
-3.2282 49.7004 6.5 9.9 21.8 5.2 375 69.8 25.6
-3.2081 49.7004 6.5 9.9 21.8 5.2 375 69.6 26.3
-3.1881 49.7004 6.5 9.8 21.9 5.3 375 69.4 26.1
-3.1681 49.7004 6.5 9.8 21.9 5.3 375 69.1 25.8
-3.148 49.7004 6.5 9.8 21.9 5.4 352 68.7 26
-3.128 49.7004 6.5 9.8 22 5.4 300 67.8 26.5
-3.108 49.7004 6.5 9.7 22 5.5 300 67.1 27.1
-3.0879 49.7004 6.5 9.7 22.1 5.5 300 69 28.4
-3.0679 49.7004 6.5 9.7 22.1 5.5 300 72.5 30.1
-3.0479 49.7004 6.5 9.7 22.1 5.6 300 75.4 31.5
-3.0279 49.7004 6.5 9.6 22.1 5.7 300 76.1 32.2
-3.0078 49.7004 6.5 9.6 22.2 5.7 300 75.4 32.5
-2.9878 49.7004 6.5 9.6 22.2 5.7 300 74.8 32.7
-2.9678 49.7004 6.5 9.6 22.1 5.7 300 74.5 32.9
-2.9477 49.7004 6.5 9.6 22.1 5.7 300 74.4 33.1
-2.9277 49.7004 6.5 9.6 22.1 5.7 300 74.2 33.3
-2.9077 49.7004 6.5 9.6 22 5.6 300 74.1 33
-2.8876 49.7004 6.5 9.6 21.9 5.6 300 74.1 32.4
-2.8676 49.7004 6.5 9.6 21.9 5.6 300 74 31.9
-2.8476 49.7004 6.5 9.6 21.9 5.6 300 74 31.7
-2.8275 49.7004 6.5 9.6 21.8 5.5 300 74 31.4
-2.8075 49.7004 6.5 9.6 21.7 5.5 300 74.1 31.3
-2.7875 49.7004 6.5 9.6 21.7 5.5 300 74.1 31.1
-2.7674 49.7004 6.5 9.6 21.6 5.5 300 74.1 30.8
-2.7474 49.7004 6.5 9.6 21.6 5.5 300 74.2 30.8
-2.7274 49.7004 6.5 9.6 21.5 5.4 300 74.3 30.8
-2.7074 49.7004 6.5 9.6 21.5 5.4 300 74.4 30.8
-2.6873 49.7004 6.5 9.6 21.5 5.5 300 74.5 31.1
-2.6673 49.7004 6.5 9.6 21.6 5.5 300 74.7 31.6
-2.6473 49.7004 6.5 9.6 21.6 5.5 300 74.9 31.8
-2.6272 49.7004 6.5 9.6 21.6 5.5 300 75.3 31.5
-2.6072 49.7004 6.5 9.6 21.6 5.5 300 75.7 31
-2.5872 49.7004 6.5 9.6 21.6 5.5 300 76.5 31
-2.5671 49.7004 6.5 9.6 21.6 5.5 300 77.9 31.2
-2.5471 49.7004 6.5 9.6 21.6 5.5 300 78.1 31
-2.5271 49.7004 6.5 9.6 21.6 5.5 300 72.9 28.9
-2.507 49.7004 6.5 9.6 21.6 5.5 300 64.8 25.8
-2.487 49.7004 6.5 9.6 21.6 5.5 300 57.5 23.1
-2.467 49.7004 6.5 9.6 21.6 5.5 300 58.6 23.5
-2.4469 49.7004 6.5 9.6 21.6 5.5 300 60.3 24.2
-2.4269 49.7004 6.5 9.6 21.6 5.5 300 61.7 24.7
-2.4069 49.7004 6.5 9.6 21.6 5.5 300 62.2 25
-2.3869 49.7004 6.5 9.6 21.6 5.5 300 62.6 25.3
-2.3668 49.7004 6.5 9.6 21.6 5.5 300 62.8 25.4
-2.3468 49.7004 6.5 9.6 21.6 5.5 300 62.7 25.3
-2.3268 49.7004 6.5 9.6 21.5 5.6 300 62.7 25.2
-2.3067 49.7004 6.5 9.5 21.5 5.6 300 62.7 25.4
-2.2867 49.7004 6.5 9.5 21.5 5.6 300 61.8 25.4
-2.2667 49.7004 6.5 9.5 21.5 5.6 300 61.5 25.4
-2.2466 49.7004 6.5 9.5 21.5 5.6 300 61.6 25.5
-2.2266 49.7004 6.5 9.5 21.5 5.6 300 61.7 25.5
-2.2066 49.7004 6.5 9.5 21.5 5.6 300 61.9 25.6
-2.1865 49.7004 6.5 9.5 21.5 5.6 300 62.2 25.9
-2.1665 49.7004 6.5 9.5 21.4 5.6 300 62.6 26.1
-2.1465 49.7004 6.5 9.5 21.4 5.6 300 63 26.4
-2.1264 49.7004 6.5 9.5 21.4 5.7 300 64 26.9
-2.1064 49.7004 6.5 9.5 21.4 5.7 300 64.4 27.1
-2.0864 49.7004 6.5 9.5 21.4 5.7 300 64.6 27.3
-2.0664 49.7004 6.5 9.4 21.4 5.7 300 64.5 27.5
-2.0463 49.7004 6.5 9.4 21.4 5.7 300 63.9 27.4
-2.0263 49.7004 6.5 9.4 21.4 5.8 300 63.8 27.9
-2.0063 49.7004 6.5 9.4 21.4 5.8 300 63.7 28.3
-1.9862 49.7004 6.5 9.4 21.4 5.8 300 63.6 28.7
-1.9662 49.7004 6.5 9.4 21.4 5.8 300 63.6 28.9
-1.9462 49.7004 6.5 9.4 21.4 5.8 300 64.1 29.4
-1.9261 49.7004 6.5 9.4 21.3 5.8 300 65.8 30.3
-1.9061 49.7004 6.5 9.4 21.3 5.8 300 67.3 31
-1.8861 49.7004 6.5 9.4 21.3 5.8 300 67.1 31.1
-1.866 49.7004 6.5 9.4 21.3 5.8 300 66.3 31.4
-1.846 49.7004 6.5 9.4 21.2 5.8 300 65.5 31.5
-1.826 49.7004 6.5 9.4 21.2 5.8 300 64.7 31.4
-1.8059 49.7004 6.5 9.4 21.2 5.8 300 63.8 31
-1.7859 49.7004 6.5 9.4 21.2 5.8 300 62.4 30.2
-1.7659 49.7004 6.5 9.4 21.2 5.8 300 61 29.5
-1.7459 49.7004 6.5 9.3 21.1 5.8 323 60.1 29.2
-1.7258 49.7004 6.5 9.3 21.1 5.8 325 60 29.2
-1.7058 49.7004 6.5 9.3 21.1 5.8 325 60.3 29.4
-1.6858 49.7004 6.5 9.3 21.1 5.8 325 60.9 29.6
-1.6657 49.7004 6.5 9.3 21.1 5.8 325 61.6 29.8
-1.6457 49.7004 6.5 9.3 21.1 5.8 325 62.3 30
-1.6257 49.7004 6.4 9.3 21.2 5.8 325 63.3 30
-1.6056 49.7004 6.4 9.4 21.2 5.8 325 64.5 30.1
-1.5856 49.7004 6.4 9.4 21.2 5.8 325 65.9 30.3
-1.5656 49.7004 6.4 9.4 21.2 5.7 325 67.4 30.7
-1.5455 49.7004 6.4 9.4 21.2 5.7 325 63.9 28.8
-1.5255 49.7004 6.4 9.4 21.2 5.7 325 60.8 26.9
-1.5055 49.7004 6.4 9.4 21.2 5.7 325 60.8 26.4
-1.4854 49.7004 6.4 9.5 21.2 5.7 345 62 26.2
-1.4654 49.7004 6.4 9.5 21.2 5.7 375 65.3 26.8
-1.4454 49.7004 6.4 9.5 21.2 5.7 375 67.9 27.2
-1.4254 49.7004 6.4 9.5 21.2 5.6 375 68.6 27.1
-1.4053 49.7004 6.4 9.6 21.2 5.5 375 68.4 26.8
-1.3853 49.7004 6.4 9.6 21.2 5.5 375 68.2 26.5
-1.3653 49.7004 6.4 9.6 21.3 5.5 375 66.6 25.9
-1.3452 49.7004 6.4 9.7 21.3 5.4 375 63.1 24.9
-1.3252 49.7004 6.4 9.7 21.4 5.4 375 62.9 24.8
-1.3052 49.7004 6.4 9.7 21.5 5.5 375 62.8 24.7
-1.2851 49.7004 6.4 9.7 21.6 5.5 375 62 24.5
-1.2651 49.7004 6.4 9.8 21.7 5.5 401 60.8 24.2
-1.2451 49.7004 6.4 9.8 21.8 5.5 426 60.1 23.8
-1.225 49.7004 6.4 9.8 22 5.5 426 58.8 23.2
-1.205 49.7004 6.4 9.8 22.1 5.5 464 57.8 22.8
-1.185 49.7004 6.4 9.8 22.2 5.6 453 62 24.1
-1.1649 49.7004 6.4 9.8 22.3 5.6 450 72.5 27.8
-1.1449 49.7004 6.4 9.8 22.4 5.6 450 79.7 30.3
-1.1249 49.7004 6.4 9.8 22.5 5.7 450 81 30.6
-1.1049 49.7004 6.4 9.8 22.6 5.7 480 80.7 30.3
-1.0848 49.7004 6.4 9.8 22.7 5.7 480 80 29.9
-1.0648 49.7004 6.4 9.8 22.8 5.8 493 79.5 29.6
-1.0448 49.7004 6.4 9.8 23 5.8 525 79 29.3
-1.0247 49.7004 6.4 9.8 23.1 5.8 525 79 29.2
-1.0047 49.7004 6.4 9.8 23.3 5.8 525 78.9 29.1
-0.9847 49.7004 6.4 9.8 23.4 5.9 525 77.5 28.6
-0.9646 49.7004 6.4 9.8 23.5 5.9 525 70.7 26
-0.9446 49.7004 6.4 9.8 23.6 5.9 525 61 22.4
-0.9246 49.7004 6.4 9.8 23.7 6 503 59.6 21.5
-0.9045 49.7004 6.4 9.8 23.8 6 505 60.4 21.6
-0.8845 49.7004 6.4 9.8 24 6 513 61.3 21.7
-0.8645 49.7004 6.4 9.8 24.1 6 550 64.8 22.6
-0.8444 49.7004 6.4 9.8 24.1 6 550 74.4 25.4
-0.8244 49.7004 6.4 9.8 24.2 6 550 78.1 26.2
-0.8044 49.7004 6.4 9.8 24.3 6 550 77.5 25.8
-0.7844 49.7004 6.4 9.8 24.4 6 550 76.8 25.6
-0.7643 49.7004 6.4 9.9 24.4 6 550 76.7 25.4
-0.7443 49.7004 6.4 9.9 24.5 6 550 76.8 25.5
-0.7243 49.7004 6.4 9.9 24.6 6.1 550 77.7 26.1
-0.7042 49.7004 6.4 9.9 24.7 6.1 550 77.6 26.4
-0.6842 49.7004 6.4 9.9 24.7 6.1 550 71.8 24.5
-0.6642 49.7004 6.4 9.9 24.8 6.1 550 63.4 21.4
-0.6441 49.7004 6.4 9.9 25 6.2 550 57.7 19.4
-0.6241 49.7004 6.4 9.9 25.1 6.2 550 58 19.7
-0.6041 49.7004 6.4 9.9 25.2 6.3 550 59.6 20.5
-0.584 49.7004 6.4 9.9 25.3 6.3 550 60.8 21.1
-0.564 49.7004 6.4 9.9 25.4 6.4 550 61.4 21.2
-0.544 49.7004 6.4 9.9 25.5 6.4 550 62 21.2
-0.5239 49.7004 6.4 9.9 25.6 6.4 550 62.3 21.1
-0.5039 49.7004 6.4 9.9 25.7 6.5 550 62.5 21
-0.4839 49.7004 6.4 9.9 25.8 6.5 550 62.8 20.9
-0.4638 49.7004 6.4 9.9 25.8 6.5 550 62.9 20.7
-0.4438 49.7004 6.4 9.9 25.9 6.5 550 63 20.5
-0.4238 49.7004 6.4 9.9 25.9 6.5 550 63.1 20.4
-0.4038 49.7004 6.4 9.9 26 6.5 550 63.2 20.2
-0.3837 49.7004 6.4 9.9 26 6.5 550 63.3 19.9
-0.3637 49.7004 6.4 9.9 26.1 6.5 562 63.3 19.8
-0.3437 49.7004 6.4 9.9 26.2 6.5 575 63.4 19.6
-0.3236 49.7004 6.4 9.9 26.2 6.5 575 63.5 19.4
-0.3036 49.7004 6.4 9.9 26.3 6.5 575 63.6 19.3
-0.2836 49.7004 6.4 9.9 26.3 6.5 575 63.7 19.1
-0.2635 49.7004 6.4 9.9 26.4 6.5 575 63.8 19
-0.2435 49.7004 6.4 9.9 26.4 6.5 575 63.9 18.9
-0.2235 49.7004 6.4 9.9 26.4 6.5 575 64 18.9
-0.2034 49.7004 6.4 9.9 26.5 6.5 575 64.1 18.9
-0.1834 49.7004 6.4 9.9 26.5 6.5 575 64.1 19
-0.1634 49.7004 6.4 9.9 26.5 6.6 575 64.2 19.2
-0.1433 49.7004 6.4 9.9 26.6 6.6 575 64.2 19.3
-0.1233 49.7004 6.4 9.9 26.6 6.6 575 64.3 19.2
-0.1033 49.7004 6.4 9.9 26.7 6.7 575 64.3 19.2
-0.0833 49.7004 6.4 9.9 26.8 6.7 575 64.3 19.3
-0.0632 49.7004 6.4 9.8 26.8 6.8 575 64.3 19.4
-0.0432 49.7004 6.4 9.8 26.9 6.8 575 64.3 19.6
-0.0232 49.7004 6.4 9.8 26.9 6.8 575 64.3 19.7
-0.0031 49.7004 6.4 9.8 27 6.9 575 64.3 19.9
0.0169 49.7004 6.4 9.8 27 6.9 575 64.3 20.1
0.0369 49.7004 6.4 9.8 27.1 7 575 64.3 20.3
0.057 49.7004 6.4 9.8 27.2 7 575 64.3 20.5
0.077 49.7004 6.4 9.9 27.2 7 575 64.3 20.8
0.097 49.7004 6.4 9.9 27.3 7 575 64.3 21.1
0.1171 49.7004 6.4 9.8 27.3 7 575 64.2 21.3
0.1371 49.7004 6.4 9.8 27.4 7.1 575 64.2 21.5
0.1571 49.7004 6.4 9.8 27.4 7.1 575 64.2 21.2
0.1772 49.7004 6.4 9.8 27.4 7.1 575 64.2 20.8
0.1972 49.7004 6.4 9.8 27.5 7.2 575 64.1 20.6
0.2172 49.7004 6.4 9.8 27.5 7.2 575 64.1 20.6
0.2372 49.7004 6.4 9.8 27.6 7.2 575 64.1 20.7
0.2573 49.7004 6.4 9.8 27.6 7.2 575 64.1 20.7
0.2773 49.7004 6.4 9.7 27.7 7.2 575 64 20.7
0.2973 49.7004 6.4 9.7 27.7 7.3 575 64 20.7
0.3174 49.7004 6.4 9.7 27.8 7.3 575 64 20.8
0.3374 49.7004 6.4 9.7 27.8 7.3 575 64 20.9
0.3574 49.7004 6.4 9.7 27.8 7.3 575 63.9 21
0.3775 49.7004 6.4 9.7 27.8 7.3 575 63.9 21.1
0.3975 49.7004 6.4 9.7 27.9 7.4 575 63.9 21.8
0.4175 49.7004 6.4 9.7 27.9 7.4 575 63.9 22.3
0.4376 49.7004 6.4 9.7 27.9 7.4 575 63.8 22.2
0.4576 49.7004 6.4 9.7 28 7.4 575 63.8 21.7
0.4776 49.7004 6.4 9.7 28 7.4 575 63.8 21.5
0.4977 49.7004 6.4 9.7 28 7.5 575 63.8 21.9
0.5177 49.7004 6.4 9.7 28.1 7.5 575 63.8 22.4
0.5377 49.7004 6.4 9.7 28.1 7.5 575 63.8 22.7
0.5577 49.7004 6.4 9.7 28.1 7.5 575 63.8 22.8
0.5778 49.7004 6.4 9.7 28.2 7.5 575 63.7 22.9
0.5978 49.7004 6.4 9.7 28.2 7.6 575 63.7 22.8
0.6178 49.7004 6.4 9.7 28.2 7.6 575 63.7 22.5
0.6379 49.7004 6.4 9.7 28.3 7.6 575 63.7 22.6
0.6579 49.7004 6.4 9.7 28.3 7.6 575 63.7 23.2
0.6779 49.7004 6.4 9.7 28.3 7.6 575 63.7 23.7
0.698 49.7004 6.4 9.7 28.3 7.7 575 63.7 23.8
0.718 49.7004 6.4 9.7 28.4 7.7 575 63.7 23.5
0.738 49.7004 6.4 9.7 28.4 7.7 575 63.6 23.5
0.7581 49.7004 6.4 9.7 28.4 7.8 575 63.6 23.8
0.7781 49.7004 6.4 9.7 28.5 7.8 575 63.6 24
0.7981 49.7004 6.4 9.7 28.5 7.8 575 63.6 24.2
0.8182 49.7004 6.4 9.7 28.5 7.8 575 63.6 24.3
0.8382 49.7004 6.4 9.7 28.5 7.8 575 63.6 24.5
0.8582 49.7004 6.4 9.7 28.5 7.9 575 63.6 24.6
0.8782 49.7004 6.4 9.7 28.5 7.9 575 63.6 24.7
0.8983 49.7004 6.4 9.7 28.4 7.8 575 63.6 24.9
0.9183 49.7004 6.4 9.7 28.4 7.8 575 63.6 25
0.9383 49.7004 6.4 9.7 28.4 7.7 575 63.6 25.4
0.9584 49.7004 6.4 9.7 28.3 7.7 575 63.6 26.1
0.9784 49.7004 6.4 9.7 28.3 7.7 575 63.6 26.3
0.9984 49.7004 6.4 9.7 28.2 7.6 575 63.6 25.4
1.0185 49.7004 6.4 9.7 28.2 7.6 600 63.6 24.5
1.0385 49.7004 6.4 9.7 28.1 7.5 600 63.6 23.8
1.0585 49.7004 6.4 9.7 28.1 7.5 600 63.5 23.5
1.0786 49.7004 6.4 9.7 28.1 7.4 600 63.5 23.2
1.0986 49.7004 6.4 9.7 28.1 7.4 600 63.5 22.9
1.1186 49.7004 6.4 9.6 28.1 7.5 600 63.5 22.6
1.1387 49.7004 6.4 9.6 28.1 7.5 600 63.5 22.2
1.1587 49.7004 6.4 9.6 28.1 7.5 600 63.5 22
1.1787 49.7004 6.4 9.6 28.1 7.5 600 63.5 21.9
1.1987 49.7004 6.4 9.6 28.1 7.5 600 63.5 21.8
1.2188 49.7004 6.4 9.6 28.2 7.6 600 63.5 21.8
1.2388 49.7004 6.4 9.6 28.2 7.6 600 63.5 22
1.2588 49.7004 6.4 9.6 28.2 7.6 590 63.5 22.1
1.2789 49.7004 6.4 9.6 28.2 7.6 590 63.5 22.1
1.2989 49.7004 6.4 9.6 28.2 7.6 600 63.5 21.8
1.3189 49.7004 6.4 9.6 28.2 7.6 600 63.5 21.7
1.339 49.7004 6.4 9.6 28.2 7.6 600 63.4 21.7
1.359 49.7004 6.5 9.6 28.2 7.6 600 63.4 21.7
1.379 49.7004 6.5 9.6 28.2 7.6 600 63.4 21.6
1.3991 49.7004 6.5 9.6 28.2 7.6 600 63.4 21.6
1.4191 49.7004 6.5 9.6 28.1 7.6 595 63.4 21.5
1.4391 49.7004 6.5 9.5 28.1 7.6 590 63.4 21.6
1.4592 49.7004 6.5 9.5 28.1 7.6 579 63.4 21.8
1.4792 49.7004 6.5 9.5 28.2 7.6 575 63.4 22
1.4992 49.7004 6.5 9.5 28.2 7.6 575 63.4 22.5
1.5192 49.7004 6.5 9.5 28.2 7.6 575 63.4 23
1.5393 49.7004 6.5 9.5 28.2 7.6 575 63.4 23.4
1.5593 49.7004 6.5 9.5 28.3 7.7 575 63.3 23.6
1.5793 49.7004 6.5 9.5 28.3 7.7 577 63.3 23.5
1.5994 49.7004 6.5 9.5 28.3 7.7 590 63.3 23.5
1.6194 49.7004 6.5 9.5 28.3 7.8 575 63.3 23.7
1.6394 49.7004 6.5 9.5 28.4 7.8 575 63.3 24.1
1.6595 49.7004 6.5 9.5 28.4 7.8 575 63.3 24.4
1.6795 49.7004 6.5 9.5 28.4 7.9 575 63.2 24.6
1.6995 49.7004 6.5 9.5 28.4 7.9 575 63.2 24.8
1.7196 49.7004 6.5 9.5 28.4 7.9 575 63.2 25.2
1.7396 49.7004 6.5 9.5 28.5 8 575 63.2 25.8
1.7596 49.7004 6.5 9.4 28.5 8.1 575 63.2 26.4
1.7797 49.7004 6.5 9.4 28.6 8.2 575 63.1 27.2
1.7997 49.7004 6.5 9.4 28.6 8.2 575 63.1 28.1
1.8197 49.7004 6.5 9.4 28.7 8.3 575 63.1 28.9
1.8397 49.7004 6.5 9.5 28.8 8.4 575 63 29.4
1.8598 49.7004 6.5 9.6 28.9 8.4 545 63 29.9
1.8798 49.7004 6.6 9.6 28.9 8.4 525 63 30.5
1.8998 49.7004 6.6 9.7 29 8.5 525 62.9 31.2
1.9199 49.7004 6.6 9.8 29 8.5 525 62.9 31.8
1.9399 49.7004 6.6 9.8 29.1 8.5 525 62.9 32.2
1.9599 49.7004 6.6 9.9 29.1 8.6 525 62.8 32.6
1.98 49.7004 6.6 10 29.2 8.6 525 62.8 33.3
2 49.7004 6.6 10 29.2 8.7 525 62.7 34.3
-10.8 49.7205 6.3 10.1 31.8 8.9 550 58.3 27
-10.78 49.7205 6.3 10.1 31.8 8.9 550 58.4 27.2
-10.7599 49.7205 6.3 10.1 31.8 8.9 550 58.4 27.5
-10.7399 49.7205 6.3 10.1 31.7 8.8 550 58.5 28.3
-10.7199 49.7205 6.3 10.2 31.7 8.8 550 58.4 28.7
-10.6998 49.7205 6.3 10.2 31.7 8.8 550 58.4 29
-10.6798 49.7205 6.3 10.2 31.7 8.7 550 58.4 29.1
-10.6598 49.7205 6.3 10.2 31.6 8.7 550 58.4 28.9
-10.6397 49.7205 6.3 10.2 31.6 8.6 560 58.4 28.8
-10.6197 49.7205 6.3 10.2 31.6 8.6 575 58.3 28.9
-10.5997 49.7205 6.3 10.2 31.6 8.6 575 58.3 28.7
-10.5797 49.7205 6.3 10.2 31.6 8.7 575 58.3 28.8
-10.5596 49.7205 6.3 10.2 31.7 8.8 575 58.3 28.8
-10.5396 49.7205 6.3 10.2 31.9 8.9 575 58.3 28.6
-10.5196 49.7205 6.3 10.2 32 9 575 58.3 28.4
-10.4995 49.7205 6.3 10.2 32.1 9.1 575 58.3 28.7
-10.4795 49.7205 6.3 10.2 32.2 9.1 575 58.2 29.5
-10.4595 49.7205 6.3 10.2 32.2 9.2 575 58.2 30.2
-10.4394 49.7205 6.3 10.2 32.3 9.3 575 58.2 30.6
-10.4194 49.7205 6.3 10.1 32.4 9.3 575 58.2 30.8
-10.3994 49.7205 6.3 10.1 32.5 9.4 575 58.2 31.3
-10.3793 49.7205 6.3 10.1 32.6 9.5 575 58.2 32.6
-10.3593 49.7205 6.3 10.1 32.7 9.5 575 58.2 33.7
-10.3393 49.7205 6.3 10.1 32.8 9.6 575 58.1 34.8
-10.3192 49.7205 6.3 10.1 32.9 9.7 575 58.1 36
-10.2992 49.7205 6.3 10.1 32.9 9.7 575 58.1 37.2
-10.2792 49.7205 6.3 10.2 33 9.8 575 58.1 38.2
-10.2592 49.7205 6.3 10.2 33 9.9 575 58.1 39.2
-10.2391 49.7205 6.3 10.2 33.1 9.9 575 58.1 40.4
-10.2191 49.7205 6.3 10.2 33.1 10 575 58 41.2
-10.1991 49.7205 6.3 10.2 33.2 10 575 58 41.7
-10.179 49.7205 6.3 10.2 33.2 10 575 58 41.9
-10.159 49.7205 6.3 10.2 33.2 10 575 58 41
-10.139 49.7205 6.3 10.2 33.3 10.1 575 58 39.6
-10.1189 49.7205 6.3 10.2 33.3 10.1 575 58.1 38.7
-10.0989 49.7205 6.3 10.2 33.4 10.1 575 58.4 38.7
-10.0789 49.7205 6.2 10.2 33.4 10.1 586 58.8 38.2
-10.0588 49.7205 6.2 10.2 33.4 10.1 600 59 38
-10.0388 49.7205 6.2 10.2 33.5 10.1 600 58.9 38
-10.0188 49.7205 6.2 10.2 33.5 10.1 600 58.9 38.3
-9.9987 49.7205 6.2 10.2 33.5 10.1 600 58.8 38.2
-9.9787 49.7205 6.2 10.2 33.5 10.1 600 58.7 37.9
-9.9587 49.7205 6.2 10.2 33.5 10.1 600 58.7 37.7
-9.9387 49.7205 6.2 10.2 33.5 10.1 600 59.2 37.8
-9.9186 49.7205 6.2 10.3 33.6 10.1 600 59.9 37.7
-9.8986 49.7205 6.2 10.3 33.6 10.1 600 60.2 37.7
-9.8786 49.7205 6.2 10.3 33.6 10.1 600 60.2 37.6
-9.8585 49.7205 6.2 10.3 33.6 10.1 600 60.1 37.6
-9.8385 49.7205 6.2 10.3 33.6 10.1 600 60.1 37.7
-9.8185 49.7205 6.2 10.3 33.6 10.1 600 60 37.3
-9.7984 49.7205 6.2 10.3 33.6 10.1 624 59.9 36.6
-9.7784 49.7205 6.2 10.3 33.6 10.1 625 59.9 36.4
-9.7584 49.7205 6.2 10.3 33.6 10 625 59.8 36.1
-9.7383 49.7205 6.2 10.3 33.6 10 625 59.8 35.5
-9.7183 49.7205 6.2 10.3 33.6 9.9 625 59.7 34.9
-9.6983 49.7205 6.2 10.3 33.6 9.9 625 59.7 34.3
-9.6782 49.7205 6.2 10.3 33.6 9.9 625 59.7 34
-9.6582 49.7205 6.2 10.3 33.5 9.8 625 59.6 34.5
-9.6382 49.7205 6.2 10.3 33.4 9.8 625 59.6 35.1
-9.6182 49.7205 6.2 10.3 33.4 9.8 625 59.6 35.5
-9.5981 49.7205 6.2 10.3 33.3 9.7 625 59.6 35.3
-9.5781 49.7205 6.2 10.4 33.2 9.7 625 59.5 35.2
-9.5581 49.7205 6.2 10.4 33.1 9.6 625 59.5 35.1
-9.538 49.7205 6.2 10.4 33 9.6 625 59.5 34.9
-9.518 49.7205 6.2 10.4 33 9.5 637 59.5 34.9
-9.498 49.7205 6.2 10.4 32.9 9.5 650 59.4 34.6
-9.4779 49.7205 6.2 10.4 32.9 9.6 650 59.4 34.4
-9.4579 49.7205 6.2 10.4 32.9 9.6 639 59.4 33.9
-9.4379 49.7205 6.2 10.4 32.9 9.6 639 59.3 33.3
-9.4178 49.7205 6.2 10.4 32.9 9.6 639 59.2 32.7
-9.3978 49.7205 6.2 10.4 32.9 9.6 639 59.2 32.4
-9.3778 49.7205 6.2 10.4 32.9 9.6 639 59.2 32.9
-9.3577 49.7205 6.2 10.4 32.8 9.6 639 59.3 33.7
-9.3377 49.7205 6.2 10.4 32.8 9.6 639 59.3 34.1
-9.3177 49.7205 6.2 10.4 32.7 9.6 639 59.4 33.8
-9.2977 49.7205 6.2 10.4 32.7 9.6 639 59.4 33.5
-9.2776 49.7205 6.2 10.4 32.6 9.6 639 59.5 33.4
-9.2576 49.7205 6.2 10.4 32.6 9.6 639 59.5 33.4
-9.2376 49.7205 6.2 10.4 32.5 9.7 639 59.6 33.5
-9.2175 49.7205 6.2 10.4 32.5 9.7 639 59.7 34
-9.1975 49.7205 6.2 10.4 32.5 9.7 639 59.7 34.8
-9.1775 49.7205 6.2 10.4 32.5 9.7 639 59.7 35.5
-9.1574 49.7205 6.2 10.4 32.4 9.7 639 59.7 36.2
-9.1374 49.7205 6.2 10.4 32.4 9.7 639 59.7 36.9
-9.1174 49.7205 6.2 10.4 32.4 9.7 639 59.8 37.6
-9.0973 49.7205 6.2 10.4 32.3 9.7 639 59.7 38.2
-9.0773 49.7205 6.2 10.4 32.3 9.7 639 59.7 38.8
-9.0573 49.7205 6.2 10.4 32.3 9.7 639 59.7 38.7
-9.0372 49.7205 6.2 10.4 32.2 9.6 639 59.6 37.8
-9.0172 49.7205 6.2 10.4 32.2 9.6 639 59.5 36.8
-8.9972 49.7205 6.2 10.4 32.1 9.6 639 59.4 36.1
-8.9772 49.7205 6.2 10.4 32.1 9.6 639 59.2 35.7
-8.9571 49.7205 6.2 10.4 32 9.6 639 59 35.4
-8.9371 49.7205 6.2 10.4 32 9.6 639 58.6 35.7
-8.9171 49.7205 6.2 10.4 31.9 9.6 639 58.1 36.3
-8.897 49.7205 6.2 10.4 31.9 9.5 639 58.3 36.9
-8.877 49.7205 6.2 10.4 31.8 9.5 639 61 37.7
-8.857 49.7205 6.2 10.3 31.8 9.5 639 63.9 38.7
-8.8369 49.7205 6.2 10.3 31.8 9.5 639 65.2 39.4
-8.8169 49.7205 6.2 10.3 31.8 9.5 639 64.4 40.2
-8.7969 49.7205 6.1 10.3 31.9 9.6 639 64.1 41.2
-8.7768 49.7205 6.1 10.3 31.9 9.6 639 64.1 42
-8.7568 49.7205 6.1 10.3 32 9.7 639 63.9 42.6
-8.7368 49.7205 6.1 10.3 32 9.7 627 63.6 43.2
-8.7167 49.7205 6.1 10.3 32.1 9.8 625 63.4 44.5
-8.6967 49.7205 6.1 10.3 32.2 9.8 625 63.2 46.1
-8.6767 49.7205 6.1 10.3 32.2 9.9 614 63 48.1
-8.6567 49.7205 6.1 10.2 32.2 9.9 614 62.9 51.4
-8.6366 49.7205 6.1 10.2 32.3 10 614 62.7 55
-8.6166 49.7205 6.1 10.2 32.3 10.1 614 62.6 58.4
-8.5966 49.7205 6.1 10.2 32.3 10.1 614 62.6 61.6
-8.5765 49.7205 6.1 10.2 32.3 10.2 614 62.6 64.9
-8.5565 49.7205 6.1 10.2 32.3 10.3 600 62.5 67.7
-8.5365 49.7205 6.1 10.2 32.3 10.3 600 62.6 69.1
-8.5164 49.7205 6.1 10.2 32.2 10.2 600 62.6 70.2
-8.4964 49.7205 6.1 10.2 32.2 10.2 600 62.6 69.5
-8.4764 49.7205 6.1 10.2 32.1 10.2 600 62.7 66.9
-8.4563 49.7205 6.1 10.2 32.1 10.2 600 62.9 64.4
-8.4363 49.7205 6.1 10.2 32 10.1 600 63.3 62.6
-8.4163 49.7205 6.1 10.2 31.9 10.1 600 63.8 61.2
-8.3962 49.7205 6.1 10.2 31.9 10 600 64 59.2
-8.3762 49.7205 6.1 10.2 31.8 10 600 61.1 56.2
-8.3562 49.7205 6.1 10.2 31.7 10 600 58 53.1
-8.3362 49.7205 6.1 10.2 31.7 9.9 600 56.2 50.7
-8.3161 49.7205 6.1 10.2 31.6 9.9 600 56.4 49.6
-8.2961 49.7205 6.1 10.2 31.5 9.9 600 56.8 48.6
-8.2761 49.7205 6.1 10.2 31.5 9.8 600 57.1 47.7
-8.256 49.7205 6.1 10.2 31.4 9.8 600 57.2 47.1
-8.236 49.7205 6.1 10.2 31.3 9.7 600 57.4 46.3
-8.216 49.7205 6.1 10.2 31.2 9.7 600 57.5 45.2
-8.1959 49.7205 6.1 10.2 31.1 9.6 600 57.7 43.9
-8.1759 49.7205 6.1 10.2 31 9.6 600 57.8 42.7
-8.1559 49.7205 6.1 10.2 30.9 9.5 600 57.8 42.1
-8.1358 49.7205 6.1 10.2 30.9 9.5 600 57.9 41.8
-8.1158 49.7205 6.1 10.2 30.8 9.4 600 58 41.6
-8.0958 49.7205 6.1 10.2 30.7 9.4 600 58.1 41.3
-8.0757 49.7205 6.1 10.2 30.7 9.3 600 58.2 41.1
-8.0557 49.7205 6.1 10.1 30.6 9.3 600 58.3 40.5
-8.0357 49.7205 6.1 10.1 30.5 9.2 600 58.5 39.7
-8.0156 49.7205 6.1 10.1 30.5 9.2 600 58.6 38.9
-7.9956 49.7205 6.1 10.1 30.4 9.2 600 58.5 38.5
-7.9756 49.7205 6.1 10.2 30.4 9.2 600 58.7 38.7
-7.9556 49.7205 6.1 10.2 30.3 9.2 600 59 38.8
-7.9355 49.7205 6.1 10.2 30.3 9.2 600 58.9 38.4
-7.9155 49.7205 6.1 10.2 30.3 9.2 600 58.3 38.1
-7.8955 49.7205 6.1 10.2 30.3 9.2 600 58 37.7
-7.8754 49.7205 6.1 10.2 30.2 9.2 600 58.1 37.7
-7.8554 49.7205 6.1 10.2 30.2 9.2 614 58.1 37.6
-7.8354 49.7205 6.1 10.2 30.1 9.2 625 58 37.7
-7.8153 49.7205 6.1 10.2 30.1 9.1 625 58.4 38.2
-7.7953 49.7205 6.1 10.2 30 9.1 625 59.1 38.8
-7.7753 49.7205 6.1 10.2 29.9 9.1 625 59.2 39.4
-7.7552 49.7205 6.1 10.2 29.9 9.1 625 59 40.1
-7.7352 49.7205 6.1 10.2 29.8 9.1 625 59.2 40.9
-7.7152 49.7205 6.1 10.2 29.8 9.1 625 59.8 42.6
-7.6951 49.7205 6.1 10.2 29.8 9.1 625 59.8 44.6
-7.6751 49.7205 6.1 10.2 29.8 9.2 625 59.4 46.2
-7.6551 49.7205 6.1 10.2 29.8 9.2 625 59 46.5
-7.6351 49.7205 6.1 10.2 29.9 9.2 625 58.5 46.4
-7.615 49.7205 6.1 10.1 29.9 9.3 625 58.3 46.4
-7.595 49.7205 6.1 10.1 29.9 9.3 624 60.2 48.7
-7.575 49.7205 6.1 10.1 29.9 9.4 600 63.4 51.3
-7.5549 49.7205 6.1 10.1 29.9 9.4 600 65.5 53.6
-7.5349 49.7205 6.1 10.1 29.9 9.4 600 65.2 55.3
-7.5149 49.7205 6.1 10.1 29.9 9.4 600 64.6 56.9
-7.4948 49.7205 6.1 10.1 29.9 9.5 600 64.2 58.3
-7.4748 49.7205 6.1 10.1 29.9 9.5 600 64 59.5
-7.4548 49.7205 6.1 10.1 29.9 9.5 600 63.8 60.6
-7.4347 49.7205 6.1 10.1 29.9 9.5 600 63.6 62.1
-7.4147 49.7205 6.1 10.1 29.8 9.5 614 63.5 63.3
-7.3947 49.7205 6.1 10.1 29.8 9.5 614 63.4 64.2
-7.3746 49.7205 6.1 10.2 29.8 9.4 614 63.3 64.9
-7.3546 49.7205 6.1 10.2 29.7 9.4 614 63.2 65.8
-7.3346 49.7205 6.1 10.2 29.6 9.3 614 63.2 66.6
-7.3146 49.7205 6.1 10.2 29.6 9.3 614 63.2 67.5
-7.2945 49.7205 6.1 10.2 29.6 9.3 610 63.2 68.5
-7.2745 49.7205 6.1 10.2 29.6 9.3 600 63.2 68.9
-7.2545 49.7205 6.1 10.2 29.6 9.4 614 63.1 67.8
-7.2344 49.7205 6.1 10.2 29.6 9.4 614 63.1 66.9
-7.2144 49.7205 6.1 10.2 29.7 9.4 614 63.2 65.6
-7.1944 49.7205 6.1 10.2 29.7 9.4 614 63.2 64.1
-7.1743 49.7205 6.1 10.2 29.7 9.4 614 63.2 62.4
-7.1543 49.7205 6.1 10.2 29.6 9.3 614 63.2 61.2
-7.1343 49.7205 6.1 10.2 29.5 9.2 614 63.2 60.2
-7.1142 49.7205 6.1 10.2 29.4 9.1 614 63.2 59
-7.0942 49.7205 6.1 10.2 29.3 9 614 63.2 57
-7.0742 49.7205 6.1 10.3 29.2 8.9 614 63.2 54.8
-7.0541 49.7205 6.1 10.3 29.1 8.7 614 63.3 52.5
-7.0341 49.7205 6.1 10.3 29 8.6 619 63.3 50.1
-7.0141 49.7205 6.1 10.3 29 8.5 636 63.3 47.6
-6.9941 49.7205 6.1 10.3 29 8.5 636 63.3 45.4
-6.974 49.7205 6.1 10.3 29 8.4 636 63.3 43.1
-6.954 49.7205 6.1 10.3 29 8.4 636 63.4 41
-6.934 49.7205 6.1 10.3 29 8.3 636 63.4 39.2
-6.9139 49.7205 6.1 10.3 29 8.3 636 63.4 37.7
-6.8939 49.7205 6.1 10.3 29 8.3 636 63.4 36.3
-6.8739 49.7205 6.1 10.3 29.1 8.3 636 63.4 36.5
-6.8538 49.7205 6.1 10.3 29.1 8.3 636 63.4 37.1
-6.8338 49.7205 6.1 10.3 29.2 8.4 636 63.4 37.7
-6.8138 49.7205 6.1 10.3 29.3 8.4 636 63.4 37.5
-6.7937 49.7205 6.1 10.3 29.4 8.5 636 63.4 37.3
-6.7737 49.7205 6.1 10.3 29.5 8.6 636 63.4 37
-6.7537 49.7205 6.1 10.3 29.6 8.6 635 63.4 37.1
-6.7336 49.7205 6.1 10.2 29.7 8.6 625 63.4 37.1
-6.7136 49.7205 6.1 10.2 29.7 8.5 625 63.5 37
-6.6936 49.7205 6.1 10.2 29.7 8.5 625 63.5 36.8
-6.6736 49.7205 6.1 10.2 29.7 8.5 625 63.5 36.6
-6.6535 49.7205 6.1 10.2 29.7 8.4 625 63.5 35.8
-6.6335 49.7205 6.1 10.2 29.7 8.4 625 63.5 34.8
-6.6135 49.7205 6.1 10.2 29.7 8.4 625 63.6 33.8
-6.5934 49.7205 6.1 10.3 29.7 8.3 625 63.6 32.9
-6.5734 49.7205 6.1 10.3 29.6 8.3 625 63.7 32
-6.5534 49.7205 6.1 10.3 29.6 8.2 625 63.7 31.1
-6.5333 49.7205 6.1 10.3 29.6 8.2 625 63.8 30
-6.5133 49.7205 6.1 10.3 29.6 8.1 625 63.8 28.9
-6.4933 49.7205 6.1 10.3 29.6 8.1 625 63.9 27.7
-6.4732 49.7205 6.1 10.3 29.6 8 625 64 26.9
-6.4532 49.7205 6.1 10.3 29.4 7.9 639 64.1 25.9
-6.4332 49.7205 6.1 10.3 29.3 7.8 639 64.2 25.2
-6.4131 49.7205 6.1 10.3 29.2 7.7 639 64.3 24.6
-6.3931 49.7205 6.1 10.3 29.1 7.5 639 64.4 24
-6.3731 49.7205 6.1 10.3 28.9 7.4 639 64.5 23.6
-6.3531 49.7205 6.1 10.4 28.8 7.3 650 64.6 23.1
-6.333 49.7205 6.1 10.4 28.7 7.2 650 64.6 22.7
-6.313 49.7205 6.1 10.4 28.6 7.1 650 64.7 22.4
-6.293 49.7205 6.1 10.4 28.6 7 650 64.9 22.1
-6.2729 49.7205 6.1 10.4 28.5 6.9 650 65 21.8
-6.2529 49.7205 6.1 10.4 28.4 6.8 650 65 21.4
-6.2329 49.7205 6.1 10.4 28.3 6.7 650 65.1 21
-6.2128 49.7205 6.1 10.4 28.2 6.6 650 65.2 20.7
-6.1928 49.7205 6.1 10.4 28.2 6.6 650 65.2 20.3
-6.1728 49.7205 6.1 10.4 28.1 6.5 650 65.3 20
-6.1527 49.7205 6.1 10.4 28.1 6.5 650 65.4 19.8
-6.1327 49.7205 6.1 10.4 28 6.5 650 65.5 19.5
-6.1127 49.7205 6.1 10.5 28 6.4 650 65.6 19.3
-6.0926 49.7205 6.1 10.5 28 6.4 650 65.7 19
-6.0726 49.7205 6.1 10.5 27.9 6.4 650 65.8 18.9
-6.0526 49.7205 6.1 10.5 27.9 6.3 650 65.8 18.7
-6.0326 49.7205 6.1 10.5 27.9 6.4 650 66 18.8
-6.0125 49.7205 6.1 10.5 27.9 6.4 650 66.1 18.8
-5.9925 49.7205 6.1 10.4 27.9 6.4 650 66.3 18.9
-5.9725 49.7205 6.1 10.4 27.9 6.5 650 66.6 19.1
-5.9524 49.7205 6.1 10.4 27.9 6.5 650 66.8 19.2
-5.9324 49.7205 6.1 10.4 27.9 6.5 650 66.9 19.4
-5.9124 49.7205 6.1 10.4 28 6.6 646 67.1 19.5
-5.8923 49.7205 6.1 10.4 28 6.6 625 67.1 19.6
-5.8723 49.7205 6.1 10.4 28 6.6 625 67.2 19.8
-5.8523 49.7205 6.1 10.4 28.1 6.7 625 67.3 20
-5.8322 49.7205 6.1 10.4 28.1 6.7 625 67.5 20.2
-5.8122 49.7205 6.1 10.4 28.2 6.8 625 67.7 20.4
-5.7922 49.7205 6.1 10.4 28.2 6.8 625 68 20.6
-5.7721 49.7205 6.1 10.4 28.2 6.8 625 67.2 20.5
-5.7521 49.7205 6.1 10.4 28.2 6.8 625 64 20
-5.7321 49.7205 6.1 10.4 28.1 6.9 625 63 19.8
-5.7121 49.7205 6.1 10.4 28.1 6.9 625 63.5 19.9
-5.692 49.7205 6.1 10.4 28 6.9 625 63.9 19.8
-5.672 49.7205 6.1 10.4 28 6.9 625 64.2 19.6
-5.652 49.7205 6.1 10.4 28 6.9 625 64.5 19.6
-5.6319 49.7205 6.1 10.4 27.9 6.8 625 65 19.6
-5.6119 49.7205 6.1 10.4 27.9 6.8 625 65.5 19.5
-5.5919 49.7205 6.1 10.4 27.8 6.8 625 65.9 19.6
-5.5718 49.7205 6.1 10.4 27.8 6.7 625 64.3 19.2
-5.5518 49.7205 6.1 10.4 27.7 6.7 625 61.5 18.6
-5.5318 49.7205 6.1 10.4 27.7 6.7 625 61.3 18.5
-5.5117 49.7205 6.1 10.4 27.6 6.6 625 61.7 18.6
-5.4917 49.7205 6.1 10.4 27.6 6.6 625 61.8 18.8
-5.4717 49.7205 6.1 10.4 27.5 6.6 625 61.7 18.9
-5.4516 49.7205 6.1 10.4 27.5 6.6 625 62.1 19.2
-5.4316 49.7205 6.1 10.4 27.4 6.5 625 62.4 19.3
-5.4116 49.7205 6.1 10.4 27.4 6.5 625 62.3 19.3
-5.3915 49.7205 6.1 10.4 27.4 6.5 625 62 19.1
-5.3715 49.7205 6.1 10.4 27.4 6.5 616 61.9 19
-5.3515 49.7205 6.1 10.4 27.3 6.5 575 62.1 19.2
-5.3315 49.7205 6.1 10.4 27.3 6.6 575 62.3 19.3
-5.3114 49.7205 6.1 10.4 27.3 6.6 575 62.2 19.4
-5.2914 49.7205 6.1 10.4 27.3 6.6 575 62.3 19.5
-5.2714 49.7205 6.1 10.4 27.3 6.6 575 62.5 19.7
-5.2513 49.7205 6.2 10.4 27.2 6.6 575 62.6 19.7
-5.2313 49.7205 6.2 10.4 27.2 6.7 575 62.8 19.8
-5.2113 49.7205 6.2 10.4 27.2 6.7 575 62.9 19.8
-5.1912 49.7205 6.1 10.4 27.1 6.6 575 63.1 19.7
-5.1712 49.7205 6.1 10.3 27 6.6 575 63.2 19.6
-5.1512 49.7205 6.2 10.3 26.9 6.5 575 63.2 19.4
-5.1311 49.7205 6.2 10.3 26.9 6.5 575 63 19.1
-5.1111 49.7205 6.2 10.3 26.8 6.4 575 62.7 18.7
-5.0911 49.7205 6.2 10.4 26.7 6.4 575 62.7 18.4
-5.071 49.7205 6.2 10.4 26.6 6.3 575 62.7 18.1
-5.051 49.7205 6.2 10.4 26.5 6.3 575 62.8 17.9
-5.031 49.7205 6.2 10.4 26.4 6.2 575 62.9 17.7
-5.011 49.7205 6.2 10.4 26.4 6.1 575 63 17.5
-4.9909 49.7205 6.2 10.4 26.3 6.1 575 63.1 17.4
-4.9709 49.7205 6.2 10.4 26.2 6 575 63.2 17.3
-4.9509 49.7205 6.2 10.4 26.1 6 575 63.2 17.2
-4.9308 49.7205 6.2 10.4 26 5.9 575 63.3 17.2
-4.9108 49.7205 6.2 10.4 25.9 5.9 575 63.4 17.5
-4.8908 49.7205 6.2 10.4 25.8 5.8 575 63.5 17.7
-4.8707 49.7205 6.2 10.4 25.8 5.8 575 63.6 17.6
-4.8507 49.7205 6.2 10.4 25.7 5.8 575 63.7 17.2
-4.8307 49.7205 6.2 10.4 25.7 5.7 575 63.8 16.8
-4.8106 49.7205 6.2 10.4 25.6 5.7 558 63.9 16.8
-4.7906 49.7205 6.2 10.3 25.6 5.7 500 64 16.7
-4.7706 49.7205 6.2 10.3 25.5 5.7 500 64 16.7
-4.7505 49.7205 6.2 10.3 25.5 5.7 500 64.1 16.7
-4.7305 49.7205 6.2 10.3 25.4 5.7 500 64.1 16.8
-4.7105 49.7205 6.2 10.3 25.4 5.7 500 64.2 16.8
-4.6905 49.7205 6.2 10.3 25.3 5.7 500 64.3 16.8
-4.6704 49.7205 6.2 10.2 25.3 5.7 500 64.3 16.8
-4.6504 49.7205 6.2 10.2 25.2 5.6 500 64.3 16.8
-4.6304 49.7205 6.2 10.2 25.1 5.6 500 64.4 16.8
-4.6103 49.7205 6.2 10.2 25 5.6 500 64.4 16.8
-4.5903 49.7205 6.2 10.2 25 5.6 500 64.3 16.8
-4.5703 49.7205 6.2 10.2 24.9 5.6 500 64.3 16.7
-4.5502 49.7205 6.2 10.2 24.9 5.6 500 64.3 16.6
-4.5302 49.7205 6.2 10.2 24.9 5.6 481 64.2 16.6
-4.5102 49.7205 6.2 10.2 24.8 5.5 475 64 16.5
-4.4901 49.7205 6.2 10.2 24.8 5.5 475 64 16.5
-4.4701 49.7205 6.2 10.2 24.8 5.5 475 64 16.5
-4.4501 49.7205 6.2 10.2 24.7 5.5 475 64.1 16.6
-4.43 49.7205 6.2 10.2 24.7 5.5 475 64 16.5
-4.41 49.7205 6.2 10.2 24.7 5.5 475 64.1 16.7
-4.39 49.7205 6.2 10.2 24.6 5.5 475 64.3 16.8
-4.37 49.7205 6.2 10.2 24.6 5.5 475 64.4 16.9
-4.3499 49.7205 6.3 10.2 24.5 5.5 475 64.5 17
-4.3299 49.7205 6.3 10.2 24.5 5.5 475 64.5 17.1
-4.3099 49.7205 6.3 10.2 24.4 5.5 475 64.6 17.3
-4.2898 49.7205 6.3 10.2 24.4 5.5 475 64.6 17.5
-4.2698 49.7205 6.3 10.2 24.3 5.5 475 64.7 17.6
-4.2498 49.7205 6.3 10.2 24.2 5.5 468 64.8 17.8
-4.2297 49.7205 6.3 10.2 24.1 5.5 450 64.9 18
-4.2097 49.7205 6.3 10.2 24.1 5.5 450 64.9 18.3
-4.1897 49.7205 6.3 10.2 24.1 5.5 450 65 18.6
-4.1696 49.7205 6.3 10.2 24 5.5 450 65 18.9
-4.1496 49.7205 6.3 10.2 23.9 5.6 450 65.1 19.3
-4.1296 49.7205 6.3 10.2 23.9 5.6 450 65.3 19.7
-4.1095 49.7205 6.3 10.2 23.8 5.6 450 65.4 20.1
-4.0895 49.7205 6.3 10.1 23.8 5.6 450 65.5 20.7
-4.0695 49.7205 6.3 10.1 23.8 5.6 450 65.7 21.4
-4.0495 49.7205 6.3 10.1 23.8 5.6 450 66 22.1
-4.0294 49.7205 6.3 10.1 23.8 5.7 450 66 22.7
-4.0094 49.7205 6.3 10.1 23.8 5.7 450 66 23.3
-3.9894 49.7205 6.3 10.1 23.7 5.8 450 66.1 23.9
-3.9693 49.7205 6.3 10.1 23.7 5.8 411 66.1 24.8
-3.9493 49.7205 6.3 10.1 23.7 5.9 400 66.2 25.6
-3.9293 49.7205 6.3 10 23.7 5.9 400 66.3 26.3
-3.9092 49.7205 6.3 10 23.6 5.9 400 66.4 26.9
-3.8892 49.7205 6.3 10 23.6 6 400 66.5 27.6
-3.8692 49.7205 6.3 10 23.6 6 400 66.5 27.9
-3.8491 49.7205 6.4 10 23.6 6.1 400 66.5 28.3
-3.8291 49.7205 6.4 10 23.6 6.1 400 66.5 28.6
-3.8091 49.7205 6.4 10 23.5 6.1 400 66.8 29
-3.789 49.7205 6.4 10 23.5 6.1 400 67.2 29.3
-3.769 49.7205 6.4 10 23.4 6 400 67.6 29.6
-3.749 49.7205 6.4 10.1 23.3 6 400 67.8 29.9
-3.729 49.7205 6.4 10.1 23.2 6 400 67.8 30.2
-3.7089 49.7205 6.4 10.1 23.1 5.9 426 67.9 30.4
-3.6889 49.7205 6.4 10.1 23 5.9 500 68 30
-3.6689 49.7205 6.4 10.2 22.9 5.9 500 68 29.7
-3.6488 49.7205 6.4 10.2 22.8 5.9 500 68 29.4
-3.6288 49.7205 6.4 10.2 22.7 5.8 500 68.1 29.2
-3.6088 49.7205 6.4 10.3 22.6 5.8 500 68.1 29.1
-3.5887 49.7205 6.4 10.3 22.5 5.8 500 68.2 28.8
-3.5687 49.7205 6.4 10.3 22.4 5.7 500 68.2 28.5
-3.5487 49.7205 6.4 10.3 22.3 5.7 500 68.2 28.2
-3.5286 49.7205 6.4 10.3 22.3 5.6 500 68.2 27.7
-3.5086 49.7205 6.4 10.3 22.3 5.6 500 68.2 27.3
-3.4886 49.7205 6.4 10.3 22.2 5.6 500 68.2 27
-3.4685 49.7205 6.4 10.2 22.2 5.5 500 68.2 26.5
-3.4485 49.7205 6.4 10.2 22.2 5.5 500 68.2 25.9
-3.4285 49.7205 6.4 10.2 22.1 5.5 500 68.5 25.2
-3.4085 49.7205 6.4 10.1 22.1 5.4 397 69.1 24.9
-3.3884 49.7205 6.4 10.1 22.1 5.4 375 69.9 24.6
-3.3684 49.7205 6.4 10.1 22.1 5.4 375 70.3 24.3
-3.3484 49.7205 6.4 10 22 5.3 375 70.2 24
-3.3283 49.7205 6.4 10 22 5.3 375 70.1 23.9
-3.3083 49.7205 6.5 10 22 5.3 375 70.1 23.8
-3.2883 49.7205 6.5 10 22 5.2 375 70 23.9
-3.2682 49.7205 6.5 9.9 22 5.3 375 70 24
-3.2482 49.7205 6.5 9.9 22 5.3 375 69.9 24.9
-3.2282 49.7205 6.5 9.9 22.1 5.3 375 69.8 25.8
-3.2081 49.7205 6.5 9.9 22.1 5.4 375 69.6 26.4
-3.1881 49.7205 6.5 9.8 22.1 5.4 375 69.4 26.3
-3.1681 49.7205 6.5 9.8 22.2 5.5 375 69.1 26.4
-3.148 49.7205 6.5 9.8 22.2 5.5 352 68.7 26.7
-3.128 49.7205 6.5 9.8 22.2 5.5 300 68 27.3
-3.108 49.7205 6.5 9.7 22.3 5.6 300 67.5 28.1
-3.0879 49.7205 6.5 9.7 22.3 5.6 300 69.1 29.3
-3.0679 49.7205 6.5 9.7 22.3 5.7 300 72.6 30.9
-3.0479 49.7205 6.5 9.6 22.4 5.7 300 75.7 32.4
-3.0279 49.7205 6.5 9.6 22.4 5.8 300 76.4 33.1
-3.0078 49.7205 6.5 9.6 22.4 5.8 300 75.6 33.4
-2.9878 49.7205 6.5 9.6 22.4 5.8 300 74.9 33.7
-2.9678 49.7205 6.5 9.6 22.3 5.7 300 74.5 34.1
-2.9477 49.7205 6.5 9.6 22.3 5.7 300 74.3 34.6
-2.9277 49.7205 6.5 9.6 22.2 5.7 300 74 35
-2.9077 49.7205 6.5 9.6 22.2 5.7 300 74 34.2
-2.8876 49.7205 6.5 9.6 22.1 5.7 300 73.9 33.4
-2.8676 49.7205 6.5 9.6 22.1 5.6 300 73.8 32.8
-2.8476 49.7205 6.5 9.6 22 5.6 300 73.8 32.5
-2.8275 49.7205 6.5 9.6 22 5.6 300 73.8 32.1
-2.8075 49.7205 6.5 9.6 22 5.6 300 73.8 31.6
-2.7875 49.7205 6.5 9.6 21.9 5.6 300 73.9 31.3
-2.7674 49.7205 6.5 9.6 21.9 5.5 300 73.9 30.9
-2.7474 49.7205 6.5 9.6 21.8 5.5 300 73.9 30.8
-2.7274 49.7205 6.6 9.6 21.8 5.5 300 74 30.6
-2.7074 49.7205 6.5 9.6 21.7 5.5 300 74.1 30.7
-2.6873 49.7205 6.5 9.6 21.8 5.5 300 74.3 31.1
-2.6673 49.7205 6.5 9.6 21.8 5.5 300 74.4 31.6
-2.6473 49.7205 6.5 9.6 21.8 5.5 300 74.6 31.6
-2.6272 49.7205 6.5 9.6 21.8 5.5 300 75 31.2
-2.6072 49.7205 6.5 9.6 21.8 5.5 300 75.4 30.8
-2.5872 49.7205 6.5 9.6 21.8 5.5 300 76.1 30.7
-2.5671 49.7205 6.5 9.6 21.8 5.5 300 77.5 30.9
-2.5471 49.7205 6.5 9.6 21.8 5.5 300 78.3 31
-2.5271 49.7205 6.5 9.6 21.8 5.5 300 73.5 29.1
-2.507 49.7205 6.5 9.6 21.8 5.5 300 65.2 26
-2.487 49.7205 6.5 9.6 21.8 5.6 300 56.4 22.7
-2.467 49.7205 6.5 9.6 21.7 5.6 300 57 22.9
-2.4469 49.7205 6.5 9.6 21.7 5.6 300 58.4 23.5
-2.4269 49.7205 6.5 9.6 21.7 5.6 300 59.6 24.1
-2.4069 49.7205 6.5 9.6 21.7 5.6 300 60.1 24.4
-2.3869 49.7205 6.5 9.6 21.7 5.6 300 60.6 24.7
-2.3668 49.7205 6.5 9.6 21.7 5.6 300 60.8 24.9
-2.3468 49.7205 6.5 9.6 21.7 5.6 300 61.3 25
-2.3268 49.7205 6.5 9.6 21.7 5.6 300 62.2 25.3
-2.3067 49.7205 6.5 9.6 21.7 5.6 300 62.3 25.5
-2.2867 49.7205 6.5 9.5 21.7 5.6 300 62.3 25.7
-2.2667 49.7205 6.5 9.5 21.7 5.6 300 62.6 25.8
-2.2466 49.7205 6.5 9.5 21.6 5.6 300 62.8 26
-2.2266 49.7205 6.5 9.5 21.6 5.6 300 63 26.1
-2.2066 49.7205 6.5 9.5 21.6 5.6 300 63.2 26.3
-2.1865 49.7205 6.5 9.5 21.5 5.7 300 63.4 26.5
-2.1665 49.7205 6.5 9.5 21.5 5.7 300 63.6 26.7
-2.1465 49.7205 6.5 9.5 21.5 5.7 300 63.8 26.9
-2.1264 49.7205 6.5 9.5 21.5 5.7 300 63.8 27
-2.1064 49.7205 6.5 9.5 21.5 5.7 300 63.7 27.1
-2.0864 49.7205 6.5 9.5 21.5 5.7 300 63.3 27
-2.0664 49.7205 6.5 9.4 21.5 5.8 300 62.4 26.9
-2.0463 49.7205 6.5 9.4 21.5 5.8 300 61.8 26.9
-2.0263 49.7205 6.5 9.4 21.5 5.8 300 64.1 28.2
-2.0063 49.7205 6.5 9.4 21.5 5.8 300 65.1 29
-1.9862 49.7205 6.5 9.4 21.5 5.8 300 65.9 29.8
-1.9662 49.7205 6.5 9.4 21.5 5.8 300 67.3 30.7
-1.9462 49.7205 6.5 9.4 21.4 5.8 300 67.8 31.4
-1.9261 49.7205 6.5 9.4 21.4 5.8 300 64.2 30.2
-1.9061 49.7205 6.5 9.4 21.3 5.8 300 61.9 29.4
-1.8861 49.7205 6.5 9.4 21.3 5.8 300 61.8 29.6
-1.866 49.7205 6.5 9.4 21.3 5.8 300 61.9 29.9
-1.846 49.7205 6.5 9.4 21.3 5.8 300 61.5 30
-1.826 49.7205 6.5 9.4 21.2 5.8 300 60.6 30
-1.8059 49.7205 6.5 9.4 21.2 5.8 300 59.5 29.7
-1.7859 49.7205 6.5 9.4 21.2 5.8 300 61 30.3
-1.7659 49.7205 6.5 9.4 21.2 5.8 300 68.2 33.4
-1.7459 49.7205 6.5 9.4 21.2 5.8 323 72.6 35.3
-1.7258 49.7205 6.5 9.4 21.2 5.8 325 72.8 35.6
-1.7058 49.7205 6.5 9.4 21.2 5.8 325 72.7 35.9
-1.6858 49.7205 6.5 9.4 21.2 5.8 325 73.5 36.1
-1.6657 49.7205 6.5 9.4 21.2 5.8 325 74.2 36.4
-1.6457 49.7205 6.4 9.4 21.2 5.8 325 75 36.5
-1.6257 49.7205 6.4 9.4 21.3 5.8 325 76.2 36.6
-1.6056 49.7205 6.4 9.4 21.3 5.8 325 77.7 36.6
-1.5856 49.7205 6.4 9.4 21.3 5.8 330 79.3 36.6
-1.5656 49.7205 6.4 9.4 21.3 5.8 339 72.3 33.2
-1.5455 49.7205 6.4 9.4 21.3 5.8 339 62.2 28.2
-1.5255 49.7205 6.4 9.5 21.3 5.7 339 57.7 25.7
-1.5055 49.7205 6.4 9.5 21.3 5.7 348 58.8 25.6
-1.4854 49.7205 6.4 9.5 21.3 5.7 360 60.1 25.4
-1.4654 49.7205 6.4 9.5 21.3 5.7 375 61.4 25.3
-1.4454 49.7205 6.4 9.6 21.3 5.7 375 61.9 25.1
-1.4254 49.7205 6.4 9.6 21.3 5.6 375 61.9 24.7
-1.4053 49.7205 6.4 9.6 21.4 5.5 443 62 24.5
-1.3853 49.7205 6.4 9.7 21.4 5.5 444 62 24.4
-1.3653 49.7205 6.4 9.7 21.4 5.5 444 62.2 24.2
-1.3452 49.7205 6.4 9.7 21.4 5.4 500 62 24
-1.3252 49.7205 6.4 9.8 21.5 5.4 500 61.6 23.9
-1.3052 49.7205 6.4 9.8 21.6 5.4 500 60.6 23.6
-1.2851 49.7205 6.4 9.8 21.7 5.5 500 59.3 23.2
-1.2651 49.7205 6.4 9.8 21.8 5.5 500 62.8 24.6
-1.2451 49.7205 6.4 9.8 21.9 5.5 500 65.6 25.7
-1.225 49.7205 6.4 9.8 22 5.5 500 65.2 25.5
-1.205 49.7205 6.4 9.9 22.1 5.5 500 65.7 25.5
-1.185 49.7205 6.4 9.9 22.3 5.6 524 73.5 28.2
-1.1649 49.7205 6.4 9.9 22.4 5.6 525 80.3 30.7
-1.1449 49.7205 6.4 9.9 22.5 5.6 525 80.3 30.8
-1.1249 49.7205 6.4 9.9 22.6 5.7 525 79.1 30.3
-1.1049 49.7205 6.4 9.9 22.7 5.7 525 78.2 29.9
-1.0848 49.7205 6.4 9.9 22.8 5.7 525 77.6 29.5
-1.0648 49.7205 6.4 9.9 22.9 5.8 525 77.1 29.2
-1.0448 49.7205 6.4 9.9 23 5.8 525 76.7 28.9
-1.0247 49.7205 6.4 9.9 23.2 5.8 525 76.4 28.7
-1.0047 49.7205 6.4 9.9 23.3 5.9 525 76.2 28.5
-0.9847 49.7205 6.4 9.9 23.4 5.9 525 75.6 28.3
-0.9646 49.7205 6.4 9.9 23.6 5.9 525 71.9 26.7
-0.9446 49.7205 6.4 9.9 23.7 5.9 525 71.1 26
-0.9246 49.7205 6.4 9.9 23.7 5.9 536 72.4 26
-0.9045 49.7205 6.4 9.9 23.8 5.9 550 73.1 26.1
-0.8845 49.7205 6.4 9.9 24 5.9 550 73.9 26
-0.8645 49.7205 6.4 9.9 24 5.9 550 74.9 26
-0.8444 49.7205 6.4 9.9 24.1 5.9 550 76 26.1
-0.8244 49.7205 6.4 9.9 24.2 5.9 550 75.2 25.5
-0.8044 49.7205 6.4 9.9 24.3 5.9 550 74.8 25.1
-0.7844 49.7205 6.4 9.9 24.3 5.9 550 74.8 25
-0.7643 49.7205 6.4 9.9 24.4 6 550 75 24.9
-0.7443 49.7205 6.4 9.9 24.5 6 550 76.1 25.5
-0.7243 49.7205 6.4 9.9 24.6 6 550 77.4 26.2
-0.7042 49.7205 6.4 9.9 24.7 6 550 75.8 25.9
-0.6842 49.7205 6.4 9.9 24.8 6.1 550 66.7 22.8
-0.6642 49.7205 6.4 9.9 24.9 6.1 550 57.8 19.5
-0.6441 49.7205 6.4 9.9 25 6.2 550 56.6 19
-0.6241 49.7205 6.4 9.9 25.1 6.2 550 58.2 19.9
-0.6041 49.7205 6.4 9.9 25.2 6.3 550 59.3 20.5
-0.584 49.7205 6.4 9.9 25.3 6.3 550 59.3 20.5
-0.564 49.7205 6.4 9.9 25.4 6.4 550 59.8 20.5
-0.544 49.7205 6.4 9.9 25.5 6.4 550 60.6 20.7
-0.5239 49.7205 6.4 9.9 25.6 6.4 550 61.2 20.7
-0.5039 49.7205 6.4 9.9 25.7 6.5 550 61.5 20.6
-0.4839 49.7205 6.4 9.9 25.8 6.5 550 61.8 20.6
-0.4638 49.7205 6.4 9.9 25.8 6.5 550 62 20.5
-0.4438 49.7205 6.4 9.9 25.9 6.5 550 62.1 20.3
-0.4238 49.7205 6.4 9.9 26 6.5 550 62.2 20.2
-0.4038 49.7205 6.4 9.9 26 6.5 550 62.3 19.9
-0.3837 49.7205 6.4 9.9 26.1 6.5 550 62.4 19.7
-0.3637 49.7205 6.4 9.9 26.1 6.5 562 62.5 19.5
-0.3437 49.7205 6.4 9.9 26.2 6.5 575 62.7 19.4
-0.3236 49.7205 6.4 9.9 26.3 6.5 575 62.9 19.2
-0.3036 49.7205 6.4 9.9 26.3 6.5 575 63.1 19.1
-0.2836 49.7205 6.4 9.9 26.3 6.5 575 63.3 19
-0.2635 49.7205 6.4 9.9 26.4 6.5 575 63.4 18.8
-0.2435 49.7205 6.4 9.9 26.4 6.5 575 63.6 18.8
-0.2235 49.7205 6.4 9.9 26.5 6.5 575 63.7 18.7
-0.2034 49.7205 6.4 9.9 26.5 6.6 575 63.8 18.7
-0.1834 49.7205 6.4 9.9 26.6 6.6 575 63.9 18.8
-0.1634 49.7205 6.4 9.9 26.6 6.6 575 63.9 18.9
-0.1433 49.7205 6.4 9.9 26.7 6.7 575 64 19.1
-0.1233 49.7205 6.4 9.9 26.7 6.7 575 64.1 19.1
-0.1033 49.7205 6.4 9.9 26.8 6.7 575 64.1 19.1
-0.0833 49.7205 6.4 9.9 26.9 6.8 575 64.1 19.2
-0.0632 49.7205 6.4 9.9 26.9 6.8 575 64.2 19.3
-0.0432 49.7205 6.4 9.8 27 6.8 575 64.2 19.5
-0.0232 49.7205 6.4 9.8 27 6.9 575 64.2 19.6
-0.0031 49.7205 6.4 9.8 27.1 6.9 575 64.2 19.9
0.0169 49.7205 6.4 9.8 27.1 6.9 575 64.2 20
0.0369 49.7205 6.4 9.8 27.2 6.9 575 64.2 20.2
0.057 49.7205 6.4 9.8 27.2 7 575 64.2 20.4
0.077 49.7205 6.4 9.8 27.3 7 575 64.2 20.7
0.097 49.7205 6.4 9.8 27.3 7 575 64.2 20.9
0.1171 49.7205 6.4 9.8 27.3 7 575 64.2 21.2
0.1371 49.7205 6.4 9.8 27.4 7 575 64.2 21.4
0.1571 49.7205 6.4 9.8 27.4 7.1 575 64.1 21.1
0.1772 49.7205 6.4 9.8 27.5 7.1 575 64.1 20.9
0.1972 49.7205 6.4 9.8 27.5 7.1 575 64.1 20.6
0.2172 49.7205 6.4 9.8 27.6 7.1 575 64.1 20.7
0.2372 49.7205 6.4 9.8 27.6 7.1 575 64.1 20.7
0.2573 49.7205 6.4 9.8 27.7 7.1 575 64 20.7
0.2773 49.7205 6.4 9.8 27.7 7.2 575 64 20.7
0.2973 49.7205 6.4 9.8 27.7 7.2 575 64 20.6
0.3174 49.7205 6.4 9.7 27.8 7.3 575 64 20.6
0.3374 49.7205 6.4 9.7 27.8 7.3 575 63.9 20.7
0.3574 49.7205 6.4 9.7 27.9 7.3 575 63.9 20.7
0.3775 49.7205 6.4 9.7 27.9 7.3 575 63.9 21.3
0.3975 49.7205 6.4 9.7 28 7.3 575 63.9 21.8
0.4175 49.7205 6.4 9.7 28 7.4 575 63.8 22
0.4376 49.7205 6.4 9.7 28 7.4 575 63.8 21.5
0.4576 49.7205 6.4 9.7 28 7.4 575 63.8 21.1
0.4776 49.7205 6.4 9.7 28.1 7.4 575 63.8 21.3
0.4977 49.7205 6.4 9.7 28.1 7.4 575 63.8 21.7
0.5177 49.7205 6.4 9.7 28.1 7.5 575 63.8 21.8
0.5377 49.7205 6.4 9.7 28.2 7.5 575 63.8 21.9
0.5577 49.7205 6.4 9.7 28.2 7.5 575 63.7 21.9
0.5778 49.7205 6.4 9.7 28.2 7.5 575 63.7 22
0.5978 49.7205 6.4 9.7 28.2 7.5 575 63.7 21.9
0.6178 49.7205 6.4 9.7 28.3 7.6 575 63.7 22.1
0.6379 49.7205 6.4 9.7 28.3 7.6 575 63.7 22.5
0.6579 49.7205 6.4 9.7 28.3 7.6 575 63.7 22.8
0.6779 49.7205 6.4 9.7 28.4 7.6 575 63.7 22.9
0.698 49.7205 6.4 9.7 28.4 7.7 575 63.7 22.9
0.718 49.7205 6.4 9.7 28.4 7.7 575 63.7 23
0.738 49.7205 6.4 9.7 28.4 7.7 575 63.6 23.1
0.7581 49.7205 6.4 9.7 28.5 7.7 575 63.6 23.3
0.7781 49.7205 6.4 9.7 28.5 7.8 575 63.6 23.6
0.7981 49.7205 6.4 9.7 28.5 7.8 575 63.6 23.8
0.8182 49.7205 6.4 9.7 28.5 7.8 575 63.6 24
0.8382 49.7205 6.4 9.7 28.5 7.8 575 63.6 24.2
0.8582 49.7205 6.4 9.7 28.5 7.9 575 63.6 24.5
0.8782 49.7205 6.4 9.7 28.5 7.9 575 63.6 24.6
0.8983 49.7205 6.4 9.7 28.4 7.8 575 63.6 24.8
0.9183 49.7205 6.4 9.7 28.4 7.8 575 63.6 25
0.9383 49.7205 6.4 9.7 28.4 7.8 575 63.6 25.5
0.9584 49.7205 6.4 9.7 28.3 7.7 575 63.6 26.1
0.9784 49.7205 6.4 9.7 28.3 7.7 575 63.6 26.5
0.9984 49.7205 6.4 9.7 28.2 7.6 575 63.6 25.6
1.0185 49.7205 6.4 9.7 28.2 7.6 587 63.6 25
1.0385 49.7205 6.4 9.7 28.1 7.5 600 63.6 24.5
1.0585 49.7205 6.4 9.7 28.1 7.5 600 63.6 24.3
1.0786 49.7205 6.4 9.7 28.1 7.6 600 63.5 24.1
1.0986 49.7205 6.4 9.6 28.1 7.6 600 63.5 23.9
1.1186 49.7205 6.4 9.6 28.2 7.6 600 63.5 23.4
1.1387 49.7205 6.4 9.6 28.2 7.6 593 63.5 23.1
1.1587 49.7205 6.4 9.6 28.2 7.6 586 63.5 22.9
1.1787 49.7205 6.4 9.6 28.2 7.6 586 63.5 22.8
1.1987 49.7205 6.4 9.6 28.2 7.7 577 63.5 22.6
1.2188 49.7205 6.4 9.6 28.2 7.7 575 63.5 22.8
1.2388 49.7205 6.4 9.6 28.2 7.7 575 63.5 22.9
1.2588 49.7205 6.4 9.6 28.2 7.7 575 63.5 23
1.2789 49.7205 6.4 9.6 28.3 7.7 575 63.5 22.7
1.2989 49.7205 6.4 9.6 28.3 7.7 586 63.5 22.5
1.3189 49.7205 6.4 9.6 28.2 7.7 586 63.5 22.4
1.339 49.7205 6.4 9.6 28.2 7.7 586 63.5 22.4
1.359 49.7205 6.4 9.6 28.2 7.7 575 63.4 22.4
1.379 49.7205 6.5 9.6 28.2 7.7 575 63.4 22.4
1.3991 49.7205 6.4 9.6 28.2 7.7 575 63.4 22.3
1.4191 49.7205 6.5 9.6 28.1 7.7 575 63.4 22.3
1.4391 49.7205 6.5 9.6 28.1 7.7 575 63.4 22.4
1.4592 49.7205 6.5 9.5 28.1 7.7 575 63.4 22.5
1.4792 49.7205 6.5 9.5 28.2 7.7 575 63.4 22.7
1.4992 49.7205 6.5 9.5 28.2 7.7 575 63.4 23.3
1.5192 49.7205 6.5 9.5 28.2 7.7 575 63.4 24.3
1.5393 49.7205 6.5 9.5 28.2 7.7 575 63.4 25.2
1.5593 49.7205 6.5 9.5 28.3 7.8 575 63.3 25.1
1.5793 49.7205 6.5 9.5 28.3 7.8 575 63.3 24.6
1.5994 49.7205 6.5 9.5 28.3 7.8 575 63.3 24.5
1.6194 49.7205 6.5 9.5 28.3 7.9 575 63.3 24.8
1.6394 49.7205 6.5 9.5 28.3 7.9 575 63.3 25.2
1.6595 49.7205 6.5 9.5 28.4 7.9 575 63.3 25.5
1.6795 49.7205 6.5 9.5 28.4 8 575 63.2 25.8
1.6995 49.7205 6.5 9.5 28.4 8 575 63.2 26
1.7196 49.7205 6.5 9.5 28.4 8 575 63.2 26.5
1.7396 49.7205 6.5 9.5 28.5 8.1 575 63.2 27
1.7596 49.7205 6.5 9.5 28.5 8.2 575 63.2 27.5
1.7797 49.7205 6.5 9.4 28.6 8.2 575 63.1 28.4
1.7997 49.7205 6.5 9.5 28.6 8.3 575 63.1 29.3
1.8197 49.7205 6.5 9.6 28.7 8.3 575 63.1 29.9
1.8397 49.7205 6.5 9.6 28.8 8.4 575 63 30.4
1.8598 49.7205 6.6 9.7 28.8 8.4 545 63 30.9
1.8798 49.7205 6.6 9.8 28.9 8.5 525 63 31.5
1.8998 49.7205 6.6 9.8 28.9 8.5 525 62.9 32
1.9199 49.7205 6.6 9.9 29 8.5 525 62.9 32.5
1.9399 49.7205 6.6 10 29 8.6 525 62.9 32.8
1.9599 49.7205 6.6 10 29.1 8.6 525 62.8 33.3
1.98 49.7205 6.6 10.1 29.1 8.6 525 62.8 33.9
2 49.7205 6.6 10.1 29.2 8.7 525 62.8 34.7
-10.8 49.7405 6.3 10.1 32 9.1 550 58.2 29.3
-10.78 49.7405 6.3 10.1 32 9.1 550 58.3 29.1
-10.7599 49.7405 6.3 10.1 32 9.1 550 58.3 29.4
-10.7399 49.7405 6.3 10.1 32 9 550 58.3 29.7
-10.7199 49.7405 6.3 10.2 31.9 9 550 58.3 29.4
-10.6998 49.7405 6.3 10.2 31.9 8.9 550 58.3 29.9
-10.6798 49.7405 6.3 10.2 31.9 8.9 550 58.3 30
-10.6598 49.7405 6.3 10.2 31.9 8.9 550 58.3 29.6
-10.6397 49.7405 6.3 10.2 31.8 8.8 560 58.3 29.3
-10.6197 49.7405 6.3 10.2 31.8 8.8 575 58.2 29
-10.5997 49.7405 6.3 10.2 31.8 8.8 575 58.2 28.7
-10.5797 49.7405 6.3 10.2 31.7 8.7 575 58.2 28.4
-10.5596 49.7405 6.3 10.2 31.8 8.8 575 58.2 28.2
-10.5396 49.7405 6.3 10.2 31.9 8.9 575 58.2 28
-10.5196 49.7405 6.3 10.2 32 9 575 58.2 27.9
-10.4995 49.7405 6.3 10.2 32.1 9.1 575 58.2 28.2
-10.4795 49.7405 6.3 10.2 32.2 9.1 575 58.2 29
-10.4595 49.7405 6.3 10.2 32.3 9.2 575 58.2 29.6
-10.4394 49.7405 6.3 10.2 32.4 9.3 575 58.1 30
-10.4194 49.7405 6.3 10.2 32.5 9.4 575 58.1 30.3
-10.3994 49.7405 6.3 10.2 32.6 9.4 575 58.1 30.8
-10.3793 49.7405 6.3 10.2 32.6 9.5 575 58.1 32.1
-10.3593 49.7405 6.3 10.2 32.7 9.6 575 58.1 33.4
-10.3393 49.7405 6.3 10.1 32.8 9.6 575 58.1 34.7
-10.3192 49.7405 6.3 10.1 32.9 9.7 575 58.1 36.1
-10.2992 49.7405 6.3 10.1 33 9.8 575 58 37.4
-10.2792 49.7405 6.3 10.2 33.1 9.8 575 58 38.5
-10.2592 49.7405 6.3 10.2 33.1 9.9 575 58 39.4
-10.2391 49.7405 6.3 10.2 33.2 9.9 575 58 40.3
-10.2191 49.7405 6.3 10.2 33.2 10 575 57.9 41
-10.1991 49.7405 6.3 10.2 33.3 10 575 57.9 41.6
-10.179 49.7405 6.3 10.2 33.3 10.1 575 57.9 41.6
-10.159 49.7405 6.3 10.2 33.3 10.1 575 57.9 40.8
-10.139 49.7405 6.3 10.2 33.4 10.1 575 57.9 39.6
-10.1189 49.7405 6.3 10.2 33.4 10.1 575 58 38.8
-10.0989 49.7405 6.3 10.2 33.5 10.1 575 58.4 39
-10.0789 49.7405 6.2 10.2 33.5 10.1 586 58.8 39.1
-10.0588 49.7405 6.2 10.2 33.5 10.2 600 58.9 38.9
-10.0388 49.7405 6.2 10.2 33.6 10.2 600 58.9 38.9
-10.0188 49.7405 6.2 10.2 33.6 10.2 600 58.8 38.9
-9.9987 49.7405 6.2 10.2 33.6 10.2 600 58.8 38.7
-9.9787 49.7405 6.2 10.2 33.7 10.2 600 58.7 38.5
-9.9587 49.7405 6.2 10.2 33.7 10.1 600 58.6 38.3
-9.9387 49.7405 6.2 10.2 33.7 10.1 600 59.2 38.4
-9.9186 49.7405 6.2 10.2 33.7 10.1 600 59.8 38.5
-9.8986 49.7405 6.2 10.3 33.7 10.1 600 60.2 38.5
-9.8786 49.7405 6.2 10.3 33.7 10.1 600 60.2 38.5
-9.8585 49.7405 6.2 10.3 33.7 10.1 600 60.1 38.4
-9.8385 49.7405 6.2 10.3 33.7 10.1 600 60 38.5
-9.8185 49.7405 6.2 10.3 33.8 10.1 600 59.9 38.5
-9.7984 49.7405 6.2 10.3 33.8 10.1 624 59.9 38.3
-9.7784 49.7405 6.2 10.3 33.8 10.1 625 59.8 38.3
-9.7584 49.7405 6.2 10.3 33.8 10.1 625 59.7 38.4
-9.7383 49.7405 6.2 10.3 33.8 10.1 625 59.7 38.2
-9.7183 49.7405 6.2 10.3 33.8 10.1 625 59.6 37.2
-9.6983 49.7405 6.2 10.3 33.8 10 625 59.6 36.2
-9.6782 49.7405 6.2 10.3 33.7 10 625 59.6 35.8
-9.6582 49.7405 6.2 10.3 33.7 10 625 59.5 36.4
-9.6382 49.7405 6.2 10.3 33.6 9.9 625 59.5 37
-9.6182 49.7405 6.2 10.3 33.5 9.9 625 59.5 37.2
-9.5981 49.7405 6.2 10.3 33.4 9.8 625 59.4 36.5
-9.5781 49.7405 6.2 10.3 33.4 9.8 625 59.4 36.1
-9.5581 49.7405 6.2 10.4 33.3 9.7 625 59.4 35.7
-9.538 49.7405 6.2 10.4 33.2 9.7 625 59.3 35.3
-9.518 49.7405 6.2 10.4 33.1 9.7 637 59.3 35.1
-9.498 49.7405 6.2 10.4 33 9.6 650 59.2 34.8
-9.4779 49.7405 6.2 10.4 33 9.6 650 59.1 34.5
-9.4579 49.7405 6.2 10.4 33 9.6 650 59 34
-9.4379 49.7405 6.2 10.4 33 9.6 650 58.8 33.2
-9.4178 49.7405 6.2 10.4 33 9.6 650 58.6 32.3
-9.3978 49.7405 6.2 10.4 33 9.6 650 58.5 32
-9.3778 49.7405 6.2 10.4 32.9 9.6 650 58.5 32.4
-9.3577 49.7405 6.2 10.4 32.9 9.7 650 58.5 33.2
-9.3377 49.7405 6.2 10.4 32.8 9.7 650 58.6 33.6
-9.3177 49.7405 6.2 10.4 32.8 9.7 650 59 33.5
-9.2977 49.7405 6.2 10.4 32.7 9.7 650 59.1 33.4
-9.2776 49.7405 6.2 10.4 32.7 9.7 650 59.2 33.4
-9.2576 49.7405 6.2 10.4 32.7 9.7 650 59.3 33.7
-9.2376 49.7405 6.2 10.4 32.6 9.7 650 59.4 33.9
-9.2175 49.7405 6.2 10.4 32.6 9.7 650 59.5 34.6
-9.1975 49.7405 6.2 10.4 32.5 9.7 650 59.6 35.4
-9.1775 49.7405 6.2 10.4 32.5 9.7 650 59.6 36.1
-9.1574 49.7405 6.2 10.4 32.5 9.7 650 59.6 36.5
-9.1374 49.7405 6.2 10.4 32.4 9.7 650 59.6 37.1
-9.1174 49.7405 6.2 10.4 32.4 9.7 650 59.7 37.7
-9.0973 49.7405 6.2 10.4 32.4 9.7 650 59.6 38.2
-9.0773 49.7405 6.2 10.4 32.3 9.7 650 59.6 38.7
-9.0573 49.7405 6.2 10.4 32.3 9.7 650 59.5 38.9
-9.0372 49.7405 6.2 10.4 32.3 9.7 650 59.5 38.4
-9.0172 49.7405 6.2 10.4 32.2 9.7 650 59.4 37.5
-8.9972 49.7405 6.2 10.4 32.1 9.7 650 59.2 37
-8.9772 49.7405 6.2 10.4 32.1 9.7 650 58.9 36.6
-8.9571 49.7405 6.2 10.4 32 9.6 650 58.7 36.3
-8.9371 49.7405 6.2 10.4 32 9.6 650 58.1 36.6
-8.9171 49.7405 6.2 10.4 31.9 9.6 650 57.6 37.1
-8.897 49.7405 6.2 10.4 31.9 9.6 650 57.7 37.8
-8.877 49.7405 6.2 10.4 31.9 9.6 650 60.4 38.9
-8.857 49.7405 6.2 10.4 31.8 9.5 650 63.4 39.9
-8.8369 49.7405 6.1 10.4 31.8 9.5 650 65.3 41
-8.8169 49.7405 6.2 10.3 31.8 9.6 650 64.7 42.1
-8.7969 49.7405 6.1 10.3 31.9 9.6 650 64.1 43
-8.7768 49.7405 6.2 10.3 32 9.7 650 63.6 43.7
-8.7568 49.7405 6.1 10.3 32 9.7 650 63.4 44.3
-8.7368 49.7405 6.1 10.3 32.1 9.8 650 63.1 44.9
-8.7167 49.7405 6.1 10.3 32.1 9.8 650 63 45.7
-8.6967 49.7405 6.1 10.3 32.2 9.9 650 62.8 46.9
-8.6767 49.7405 6.1 10.3 32.3 9.9 625 62.7 48.7
-8.6567 49.7405 6.1 10.2 32.3 10 625 62.6 51
-8.6366 49.7405 6.1 10.2 32.3 10 625 62.5 54.2
-8.6166 49.7405 6.1 10.2 32.4 10.1 625 62.4 57.6
-8.5966 49.7405 6.1 10.2 32.4 10.2 625 62.4 60.7
-8.5765 49.7405 6.1 10.2 32.4 10.2 625 62.4 63.9
-8.5565 49.7405 6.1 10.2 32.4 10.3 625 62.4 66.3
-8.5365 49.7405 6.1 10.2 32.4 10.3 625 62.4 67.4
-8.5164 49.7405 6.1 10.2 32.3 10.3 625 62.4 68.6
-8.4964 49.7405 6.1 10.2 32.2 10.2 625 62.4 68.2
-8.4764 49.7405 6.1 10.2 32.2 10.2 625 62.5 65.9
-8.4563 49.7405 6.1 10.2 32.2 10.2 625 62.6 63.3
-8.4363 49.7405 6.1 10.2 32.1 10.2 625 62.8 61.9
-8.4163 49.7405 6.1 10.2 32 10.1 625 63.1 60.6
-8.3962 49.7405 6.1 10.2 32 10.1 625 63.6 59.1
-8.3762 49.7405 6.1 10.2 31.9 10 625 63.5 57.5
-8.3562 49.7405 6.1 10.2 31.8 10 625 61.3 54.9
-8.3362 49.7405 6.1 10.2 31.8 10 625 59.3 52.4
-8.3161 49.7405 6.1 10.2 31.7 9.9 625 59.3 51.1
-8.2961 49.7405 6.1 10.2 31.6 9.9 625 59.7 50.1
-8.2761 49.7405 6.1 10.2 31.6 9.8 625 59.9 49.4
-8.256 49.7405 6.1 10.2 31.5 9.8 625 60.1 48.8
-8.236 49.7405 6.1 10.2 31.4 9.7 625 60.2 48.1
-8.216 49.7405 6.1 10.2 31.3 9.7 625 60.3 46.8
-8.1959 49.7405 6.1 10.2 31.2 9.6 625 60.4 45.3
-8.1759 49.7405 6.1 10.2 31.1 9.6 625 60.5 44.2
-8.1559 49.7405 6.1 10.2 31 9.5 625 60.6 43.6
-8.1358 49.7405 6.1 10.2 31 9.5 625 60.7 43.3
-8.1158 49.7405 6.1 10.2 30.9 9.4 625 60.8 43
-8.0958 49.7405 6.1 10.2 30.8 9.4 625 60.9 42.7
-8.0757 49.7405 6.1 10.2 30.7 9.3 625 61 42.4
-8.0557 49.7405 6.1 10.2 30.7 9.3 625 61.2 42
-8.0357 49.7405 6.1 10.2 30.6 9.3 625 61.5 41.3
-8.0156 49.7405 6.1 10.2 30.5 9.2 625 61.7 40.5
-7.9956 49.7405 6.1 10.2 30.5 9.2 625 61.9 40.2
-7.9756 49.7405 6.1 10.2 30.4 9.2 625 62.2 40.3
-7.9556 49.7405 6.1 10.2 30.4 9.2 625 59.3 39.4
-7.9355 49.7405 6.1 10.2 30.4 9.2 625 58.1 38.8
-7.9155 49.7405 6.1 10.2 30.4 9.2 625 57.9 38.3
-7.8955 49.7405 6.1 10.2 30.3 9.2 625 58.2 37.7
-7.8754 49.7405 6.1 10.2 30.3 9.2 625 58.3 37.5
-7.8554 49.7405 6.1 10.2 30.2 9.2 625 58.1 37.4
-7.8354 49.7405 6.1 10.2 30.1 9.1 625 58.1 37.5
-7.8153 49.7405 6.1 10.2 30.1 9.1 625 58.6 38.1
-7.7953 49.7405 6.1 10.2 30 9.1 625 59.2 38.5
-7.7753 49.7405 6.1 10.2 29.9 9.1 625 59.6 38.9
-7.7552 49.7405 6.1 10.2 29.9 9.1 625 59.5 39.5
-7.7352 49.7405 6.1 10.2 29.8 9.1 625 59.4 40.2
-7.7152 49.7405 6.1 10.2 29.8 9.1 625 59.2 41.4
-7.6951 49.7405 6.1 10.2 29.8 9.1 625 58.8 43.1
-7.6751 49.7405 6.1 10.2 29.8 9.1 625 58.6 44.3
-7.6551 49.7405 6.1 10.2 29.9 9.2 625 58.3 44.5
-7.6351 49.7405 6.1 10.2 29.9 9.2 625 57.9 44.4
-7.615 49.7405 6.1 10.1 29.9 9.3 625 57.9 44.9
-7.595 49.7405 6.1 10.1 29.9 9.3 625 60.7 47.3
-7.575 49.7405 6.1 10.1 29.9 9.3 625 62.9 49.5
-7.5549 49.7405 6.1 10.1 29.9 9.3 625 62.3 50.7
-7.5349 49.7405 6.1 10.1 29.9 9.4 625 62.1 52.5
-7.5149 49.7405 6.1 10.1 29.9 9.4 625 63.7 54.9
-7.4948 49.7405 6.1 10.1 29.9 9.4 625 65 56.9
-7.4748 49.7405 6.1 10.1 29.9 9.5 625 64.9 58.1
-7.4548 49.7405 6.1 10.1 29.9 9.5 625 64.3 59.1
-7.4347 49.7405 6.1 10.1 29.9 9.5 625 64 60.2
-7.4147 49.7405 6.1 10.1 29.8 9.5 625 63.9 61.4
-7.3947 49.7405 6.1 10.2 29.8 9.4 625 63.6 62.7
-7.3746 49.7405 6.1 10.2 29.7 9.4 625 63.5 63.7
-7.3546 49.7405 6.1 10.2 29.7 9.4 625 63.4 64.4
-7.3346 49.7405 6.1 10.2 29.6 9.3 625 63.4 64.9
-7.3146 49.7405 6.1 10.2 29.6 9.3 625 63.3 65.9
-7.2945 49.7405 6.1 10.2 29.7 9.4 625 63.3 67
-7.2745 49.7405 6.1 10.2 29.7 9.4 625 63.3 67.4
-7.2545 49.7405 6.1 10.2 29.7 9.4 625 63.3 66.6
-7.2344 49.7405 6.1 10.2 29.7 9.4 625 63.2 66.9
-7.2144 49.7405 6.1 10.2 29.7 9.4 625 63.2 66.2
-7.1944 49.7405 6.1 10.2 29.8 9.4 625 63.2 64.6
-7.1743 49.7405 6.1 10.2 29.8 9.4 625 63.2 62.7
-7.1543 49.7405 6.1 10.2 29.7 9.4 625 63.2 61.5
-7.1343 49.7405 6.1 10.2 29.6 9.2 625 63.2 60.7
-7.1142 49.7405 6.1 10.2 29.5 9.1 625 63.2 59.6
-7.0942 49.7405 6.1 10.2 29.4 9 625 63.2 57.7
-7.0742 49.7405 6.1 10.3 29.3 8.9 625 63.2 55.6
-7.0541 49.7405 6.1 10.3 29.2 8.8 625 63.2 53.5
-7.0341 49.7405 6.1 10.3 29.2 8.7 625 63.3 51.2
-7.0141 49.7405 6.1 10.3 29.2 8.7 625 63.3 49.1
-6.9941 49.7405 6.1 10.3 29.2 8.6 625 63.3 47.1
-6.974 49.7405 6.1 10.3 29.2 8.6 625 63.3 45.1
-6.954 49.7405 6.1 10.3 29.2 8.5 625 63.3 43.6
-6.934 49.7405 6.1 10.3 29.2 8.5 625 63.3 42.2
-6.9139 49.7405 6.1 10.3 29.2 8.4 625 63.3 40.4
-6.8939 49.7405 6.1 10.3 29.2 8.4 625 63.3 38.6
-6.8739 49.7405 6.1 10.3 29.3 8.4 625 63.3 38.6
-6.8538 49.7405 6.1 10.3 29.4 8.5 625 63.3 39
-6.8338 49.7405 6.1 10.3 29.5 8.5 625 63.3 39.3
-6.8138 49.7405 6.1 10.3 29.5 8.6 625 63.3 39
-6.7937 49.7405 6.1 10.2 29.6 8.6 625 63.3 38.6
-6.7737 49.7405 6.1 10.2 29.7 8.7 625 63.3 38.3
-6.7537 49.7405 6.1 10.2 29.7 8.6 625 63.4 38.2
-6.7336 49.7405 6.1 10.2 29.7 8.6 625 63.4 37.9
-6.7136 49.7405 6.1 10.2 29.7 8.5 625 63.4 37.7
-6.6936 49.7405 6.1 10.2 29.7 8.5 625 63.4 37.3
-6.6736 49.7405 6.1 10.2 29.7 8.5 625 63.4 36.6
-6.6535 49.7405 6.1 10.2 29.7 8.4 625 63.4 35.8
-6.6335 49.7405 6.1 10.2 29.7 8.4 625 63.5 34.7
-6.6135 49.7405 6.1 10.2 29.7 8.4 625 63.5 33.6
-6.5934 49.7405 6.1 10.2 29.7 8.3 625 63.6 32.7
-6.5734 49.7405 6.1 10.2 29.7 8.3 625 63.6 31.9
-6.5534 49.7405 6.1 10.2 29.7 8.2 625 63.7 31
-6.5333 49.7405 6.1 10.3 29.7 8.2 625 63.8 29.9
-6.5133 49.7405 6.1 10.3 29.7 8.1 625 63.8 28.6
-6.4933 49.7405 6.1 10.3 29.6 8 625 63.9 27.5
-6.4732 49.7405 6.1 10.3 29.5 7.9 628 64 26.5
-6.4532 49.7405 6.1 10.3 29.4 7.8 650 64.2 25.5
-6.4332 49.7405 6.1 10.3 29.2 7.7 650 64.3 24.8
-6.4131 49.7405 6.1 10.3 29.1 7.6 650 64.4 24.1
-6.3931 49.7405 6.1 10.3 29 7.4 650 64.5 23.5
-6.3731 49.7405 6.1 10.4 28.9 7.3 650 64.6 23
-6.3531 49.7405 6.1 10.4 28.8 7.2 650 64.7 22.6
-6.333 49.7405 6.1 10.4 28.6 7.1 650 64.8 22.2
-6.313 49.7405 6.1 10.4 28.5 7 650 64.9 21.9
-6.293 49.7405 6.1 10.4 28.5 6.9 650 65 21.6
-6.2729 49.7405 6.1 10.4 28.3 6.8 650 65.1 21.4
-6.2529 49.7405 6.1 10.4 28.3 6.7 650 65.2 21
-6.2329 49.7405 6.1 10.4 28.2 6.6 650 65.2 20.7
-6.2128 49.7405 6.1 10.4 28.1 6.6 650 65.3 20.4
-6.1928 49.7405 6.1 10.4 28.1 6.6 650 65.3 20.1
-6.1728 49.7405 6.1 10.4 28.1 6.5 650 65.3 19.9
-6.1527 49.7405 6.1 10.4 28 6.5 650 65.4 19.7
-6.1327 49.7405 6.1 10.5 28 6.4 650 65.4 19.5
-6.1127 49.7405 6.1 10.5 27.9 6.4 650 65.4 19.2
-6.0926 49.7405 6.1 10.5 27.9 6.4 650 65.5 19
-6.0726 49.7405 6.1 10.5 27.8 6.3 650 65.6 18.9
-6.0526 49.7405 6.1 10.5 27.8 6.3 650 65.6 18.7
-6.0326 49.7405 6.1 10.5 27.8 6.3 650 65.7 18.7
-6.0125 49.7405 6.1 10.5 27.8 6.4 650 65.7 18.8
-5.9925 49.7405 6.1 10.4 27.8 6.4 650 65.8 18.8
-5.9725 49.7405 6.1 10.4 27.8 6.4 650 65.9 19
-5.9524 49.7405 6.1 10.4 27.9 6.5 650 66 19.1
-5.9324 49.7405 6.1 10.4 27.9 6.5 650 66.1 19.3
-5.9124 49.7405 6.1 10.4 27.9 6.5 646 66.1 19.4
-5.8923 49.7405 6.1 10.4 28 6.6 625 66.2 19.6
-5.8723 49.7405 6.1 10.4 28 6.6 625 66.3 19.7
-5.8523 49.7405 6.1 10.4 28.1 6.7 625 66.4 20
-5.8322 49.7405 6.1 10.4 28.1 6.7 625 66.5 20.1
-5.8122 49.7405 6.1 10.4 28.1 6.7 625 66.6 20.3
-5.7922 49.7405 6.1 10.4 28.2 6.8 625 66.7 20.5
-5.7721 49.7405 6.1 10.4 28.2 6.8 625 66.4 20.5
-5.7521 49.7405 6.1 10.4 28.2 6.8 625 66.8 20.6
-5.7321 49.7405 6.1 10.4 28.1 6.9 625 67.3 20.8
-5.7121 49.7405 6.1 10.4 28.1 6.9 625 67.7 20.9
-5.692 49.7405 6.1 10.4 28 6.8 625 68 20.7
-5.672 49.7405 6.1 10.4 28 6.8 625 68.3 20.5
-5.652 49.7405 6.1 10.4 27.9 6.8 625 68.7 20.4
-5.6319 49.7405 6.1 10.4 27.9 6.8 625 69 20.4
-5.6119 49.7405 6.1 10.4 27.8 6.7 625 69.4 20.3
-5.5919 49.7405 6.1 10.4 27.8 6.7 625 66.7 19.6
-5.5718 49.7405 6.1 10.4 27.7 6.7 625 63.6 18.8
-5.5518 49.7405 6.1 10.4 27.7 6.6 625 61.1 18.3
-5.5318 49.7405 6.1 10.4 27.6 6.6 625 61.5 18.4
-5.5117 49.7405 6.1 10.4 27.6 6.6 625 62.2 18.5
-5.4917 49.7405 6.1 10.4 27.5 6.5 625 62.8 18.7
-5.4717 49.7405 6.1 10.4 27.5 6.5 625 63.4 19.1
-5.4516 49.7405 6.1 10.4 27.5 6.5 625 63.6 19.3
-5.4316 49.7405 6.1 10.4 27.4 6.5 625 62.2 19.1
-5.4116 49.7405 6.1 10.4 27.4 6.5 625 61.9 19
-5.3915 49.7405 6.1 10.4 27.4 6.5 625 61.7 18.9
-5.3715 49.7405 6.1 10.4 27.4 6.5 616 62 19.1
-5.3515 49.7405 6.1 10.4 27.3 6.6 575 62.3 19.2
-5.3315 49.7405 6.1 10.4 27.3 6.6 575 62.6 19.4
-5.3114 49.7405 6.1 10.4 27.3 6.6 575 62.7 19.6
-5.2914 49.7405 6.2 10.4 27.3 6.6 575 62.9 19.7
-5.2714 49.7405 6.2 10.4 27.3 6.6 575 63.2 19.9
-5.2513 49.7405 6.2 10.4 27.2 6.6 575 63.3 20
-5.2313 49.7405 6.2 10.4 27.2 6.7 575 63.3 20
-5.2113 49.7405 6.2 10.4 27.2 6.7 575 63.1 20
-5.1912 49.7405 6.2 10.4 27.1 6.6 575 63.2 19.9
-5.1712 49.7405 6.2 10.4 27 6.6 575 63.3 19.8
-5.1512 49.7405 6.2 10.4 26.9 6.5 575 63.2 19.5
-5.1311 49.7405 6.2 10.4 26.8 6.4 575 62.9 19.1
-5.1111 49.7405 6.2 10.4 26.8 6.4 575 62.9 18.8
-5.0911 49.7405 6.2 10.4 26.7 6.3 575 63 18.5
-5.071 49.7405 6.2 10.4 26.6 6.3 575 63 18.2
-5.051 49.7405 6.2 10.4 26.5 6.2 575 62.9 17.9
-5.031 49.7405 6.2 10.4 26.4 6.2 575 62.9 17.7
-5.011 49.7405 6.2 10.4 26.3 6.1 575 63 17.5
-4.9909 49.7405 6.2 10.4 26.3 6.1 575 63 17.3
-4.9709 49.7405 6.2 10.4 26.2 6 575 63.1 17.2
-4.9509 49.7405 6.2 10.4 26.1 5.9 575 63.2 17.1
-4.9308 49.7405 6.2 10.4 26 5.9 575 63.2 17.1
-4.9108 49.7405 6.2 10.4 25.9 5.8 575 63.3 17.3
-4.8908 49.7405 6.2 10.4 25.8 5.8 575 63.5 17.3
-4.8707 49.7405 6.2 10.4 25.8 5.8 575 63.5 17.1
-4.8507 49.7405 6.2 10.4 25.8 5.8 575 63.7 16.8
-4.8307 49.7405 6.2 10.4 25.7 5.8 575 63.7 16.7
-4.8106 49.7405 6.2 10.4 25.7 5.8 558 63.8 16.7
-4.7906 49.7405 6.2 10.3 25.6 5.7 500 63.9 16.7
-4.7706 49.7405 6.2 10.3 25.6 5.7 500 63.9 16.7
-4.7505 49.7405 6.2 10.3 25.5 5.7 500 64 16.7
-4.7305 49.7405 6.2 10.3 25.5 5.7 500 64.1 16.8
-4.7105 49.7405 6.2 10.3 25.4 5.7 500 64.1 16.8
-4.6905 49.7405 6.2 10.2 25.4 5.7 500 64.2 16.8
-4.6704 49.7405 6.2 10.2 25.4 5.7 500 64.2 16.8
-4.6504 49.7405 6.2 10.2 25.2 5.7 500 64.2 16.8
-4.6304 49.7405 6.2 10.2 25.2 5.7 500 64 16.8
-4.6103 49.7405 6.2 10.2 25.1 5.6 500 63.9 16.8
-4.5903 49.7405 6.2 10.2 25.1 5.6 500 63.9 16.8
-4.5703 49.7405 6.2 10.2 25.1 5.6 500 63.9 16.7
-4.5502 49.7405 6.2 10.2 25 5.6 500 63.9 16.6
-4.5302 49.7405 6.2 10.2 25 5.6 481 63.8 16.5
-4.5102 49.7405 6.2 10.2 25 5.6 475 63.8 16.5
-4.4901 49.7405 6.2 10.2 24.9 5.6 475 63.8 16.5
-4.4701 49.7405 6.2 10.2 24.9 5.5 475 63.7 16.5
-4.4501 49.7405 6.2 10.2 24.8 5.5 475 63.7 16.5
-4.43 49.7405 6.2 10.2 24.8 5.5 475 63.7 16.5
-4.41 49.7405 6.2 10.2 24.8 5.5 475 63.8 16.5
-4.39 49.7405 6.2 10.2 24.7 5.5 475 64 16.6
-4.37 49.7405 6.2 10.2 24.7 5.5 475 64.1 16.7
-4.3499 49.7405 6.3 10.2 24.6 5.5 475 64.2 16.9
-4.3299 49.7405 6.3 10.2 24.6 5.5 475 64.3 17
-4.3099 49.7405 6.3 10.2 24.5 5.5 475 64.4 17.2
-4.2898 49.7405 6.3 10.2 24.5 5.5 475 64.4 17.3
-4.2698 49.7405 6.3 10.2 24.4 5.5 475 64.5 17.5
-4.2498 49.7405 6.3 10.2 24.3 5.5 468 64.5 17.6
-4.2297 49.7405 6.3 10.2 24.2 5.5 450 64.6 17.9
-4.2097 49.7405 6.3 10.2 24.2 5.5 450 64.7 18.2
-4.1897 49.7405 6.3 10.2 24.1 5.5 450 64.8 18.4
-4.1696 49.7405 6.3 10.2 24 5.5 450 64.8 18.7
-4.1496 49.7405 6.3 10.2 24 5.6 450 64.9 19.1
-4.1296 49.7405 6.3 10.2 24 5.6 450 65 19.5
-4.1095 49.7405 6.3 10.2 23.9 5.6 450 65.1 20
-4.0895 49.7405 6.3 10.1 23.9 5.6 450 65.2 20.6
-4.0695 49.7405 6.3 10.1 23.8 5.7 450 65.4 21.4
-4.0495 49.7405 6.3 10.1 23.8 5.7 450 65.6 22.3
-4.0294 49.7405 6.3 10.1 23.8 5.7 450 65.7 23
-4.0094 49.7405 6.3 10.1 23.8 5.8 450 65.7 23.4
-3.9894 49.7405 6.3 10.1 23.8 5.8 450 65.7 23.9
-3.9693 49.7405 6.3 10.1 23.7 5.8 411 65.8 24.7
-3.9493 49.7405 6.3 10.1 23.7 5.9 400 65.9 25.7
-3.9293 49.7405 6.3 10.1 23.7 6 400 66 26.8
-3.9092 49.7405 6.3 10.1 23.7 6 400 66.1 27.6
-3.8892 49.7405 6.3 10.1 23.6 6.1 400 66.2 28.1
-3.8692 49.7405 6.3 10 23.6 6.1 400 66.2 28.6
-3.8491 49.7405 6.3 10 23.6 6.1 400 66.3 28.9
-3.8291 49.7405 6.4 10 23.6 6.2 400 66.3 29.3
-3.8091 49.7405 6.4 10.1 23.5 6.1 400 66.5 29.7
-3.789 49.7405 6.4 10.1 23.4 6.1 400 66.9 30.1
-3.769 49.7405 6.4 10.1 23.3 6.1 400 67 30.7
-3.749 49.7405 6.3 10.1 23.2 6 400 67.1 31.1
-3.729 49.7405 6.3 10.2 23.1 6 400 67.4 31
-3.7089 49.7405 6.3 10.2 23.1 6 426 67.8 30.7
-3.6889 49.7405 6.4 10.2 23 5.9 500 67.9 30.3
-3.6689 49.7405 6.3 10.2 22.9 5.9 500 67.9 29.9
-3.6488 49.7405 6.3 10.3 22.8 5.9 500 68 29.6
-3.6288 49.7405 6.3 10.3 22.7 5.8 500 68.1 29.5
-3.6088 49.7405 6.3 10.3 22.6 5.8 500 68.1 29.3
-3.5887 49.7405 6.3 10.3 22.5 5.8 500 68.2 29.1
-3.5687 49.7405 6.3 10.4 22.4 5.7 500 68.2 28.7
-3.5487 49.7405 6.4 10.3 22.4 5.7 500 68.2 28.3
-3.5286 49.7405 6.4 10.3 22.4 5.6 500 68.2 27.9
-3.5086 49.7405 6.4 10.3 22.3 5.6 500 68.2 27.8
-3.4886 49.7405 6.4 10.2 22.3 5.6 500 68.2 27.7
-3.4685 49.7405 6.4 10.2 22.3 5.5 500 68.2 27.1
-3.4485 49.7405 6.4 10.2 22.3 5.5 500 68.2 26.2
-3.4285 49.7405 6.4 10.2 22.2 5.5 500 68.4 25.4
-3.4085 49.7405 6.4 10.1 22.2 5.4 397 69 25.1
-3.3884 49.7405 6.4 10.1 22.2 5.4 375 69.8 24.7
-3.3684 49.7405 6.4 10 22.2 5.4 375 70.2 24.5
-3.3484 49.7405 6.4 10 22.2 5.3 375 70.2 24.3
-3.3283 49.7405 6.4 10 22.1 5.3 375 70.1 24.1
-3.3083 49.7405 6.5 10 22.1 5.3 375 70 24.1
-3.2883 49.7405 6.5 9.9 22.1 5.3 375 70 24.2
-3.2682 49.7405 6.5 9.9 22.2 5.3 375 69.9 24.3
-3.2482 49.7405 6.5 9.9 22.2 5.4 375 69.8 25
-3.2282 49.7405 6.5 9.9 22.2 5.4 375 69.7 25.8
-3.2081 49.7405 6.5 9.8 22.3 5.5 375 69.6 26.4
-3.1881 49.7405 6.5 9.8 22.3 5.5 375 69.4 26.7
-3.1681 49.7405 6.5 9.8 22.3 5.5 375 69.2 26.9
-3.148 49.7405 6.5 9.8 22.4 5.6 352 68.9 27.4
-3.128 49.7405 6.5 9.7 22.4 5.6 300 68.4 28
-3.108 49.7405 6.5 9.7 22.4 5.7 300 67.9 28.8
-3.0879 49.7405 6.5 9.7 22.5 5.7 300 69.2 29.8
-3.0679 49.7405 6.5 9.6 22.5 5.8 300 72.6 31.3
-3.0479 49.7405 6.5 9.6 22.5 5.8 300 73.7 32.1
-3.0279 49.7405 6.5 9.6 22.6 5.8 300 72.7 32.2
-3.0078 49.7405 6.5 9.6 22.6 5.8 300 72.5 32.6
-2.9878 49.7405 6.5 9.6 22.5 5.8 300 74.3 33.3
-2.9678 49.7405 6.5 9.6 22.5 5.8 300 74.9 34
-2.9477 49.7405 6.5 9.6 22.4 5.8 300 74.5 34.3
-2.9277 49.7405 6.5 9.6 22.4 5.7 300 74 34.1
-2.9077 49.7405 6.5 9.6 22.4 5.7 300 73.9 33.2
-2.8876 49.7405 6.5 9.6 22.3 5.7 300 73.7 32.7
-2.8676 49.7405 6.5 9.6 22.3 5.7 300 73.7 32.3
-2.8476 49.7405 6.5 9.6 22.2 5.7 300 73.7 32
-2.8275 49.7405 6.5 9.6 22.2 5.6 300 73.6 31.6
-2.8075 49.7405 6.5 9.6 22.1 5.6 300 73.6 31.3
-2.7875 49.7405 6.5 9.6 22.1 5.6 300 73.7 30.9
-2.7674 49.7405 6.5 9.6 22 5.6 300 73.7 30.7
-2.7474 49.7405 6.5 9.6 22 5.6 300 73.7 30.5
-2.7274 49.7405 6.6 9.6 21.9 5.5 300 73.8 30.3
-2.7074 49.7405 6.5 9.6 21.9 5.5 300 73.8 30.3
-2.6873 49.7405 6.5 9.6 21.9 5.5 300 73.9 30.6
-2.6673 49.7405 6.5 9.6 21.9 5.6 300 74.1 30.8
-2.6473 49.7405 6.5 9.6 21.9 5.6 300 74.3 30.8
-2.6272 49.7405 6.5 9.6 21.9 5.6 300 74.6 30.6
-2.6072 49.7405 6.5 9.6 21.9 5.6 300 74.9 30.3
-2.5872 49.7405 6.5 9.6 21.9 5.6 300 75.6 30.3
-2.5671 49.7405 6.5 9.6 21.9 5.6 300 76.8 30.6
-2.5471 49.7405 6.5 9.6 21.9 5.6 300 77.8 30.9
-2.5271 49.7405 6.5 9.6 21.9 5.6 300 73.2 29.1
-2.507 49.7405 6.5 9.6 21.9 5.6 300 64.5 25.8
-2.487 49.7405 6.5 9.6 21.9 5.6 300 56.2 22.7
-2.467 49.7405 6.5 9.6 21.8 5.6 300 56.4 22.9
-2.4469 49.7405 6.5 9.6 21.8 5.6 300 58.5 23.7
-2.4269 49.7405 6.5 9.6 21.8 5.6 300 60.3 24.5
-2.4069 49.7405 6.5 9.6 21.8 5.6 300 61.6 25.1
-2.3869 49.7405 6.5 9.6 21.8 5.6 300 62.7 25.7
-2.3668 49.7405 6.5 9.6 21.8 5.6 300 64.3 26.5
-2.3468 49.7405 6.5 9.6 21.8 5.6 300 66 27.2
-2.3268 49.7405 6.5 9.6 21.8 5.6 300 66.3 27.3
-2.3067 49.7405 6.5 9.6 21.8 5.6 300 60.8 25.1
-2.2867 49.7405 6.5 9.5 21.8 5.7 300 60.8 25.3
-2.2667 49.7405 6.5 9.5 21.7 5.7 300 61.3 25.5
-2.2466 49.7405 6.5 9.5 21.7 5.7 300 61.7 25.8
-2.2266 49.7405 6.5 9.5 21.7 5.7 300 61.7 25.9
-2.2066 49.7405 6.5 9.5 21.6 5.7 300 61.7 26
-2.1865 49.7405 6.5 9.5 21.6 5.7 300 61.8 26.2
-2.1665 49.7405 6.5 9.5 21.6 5.7 300 61.7 26.4
-2.1465 49.7405 6.5 9.5 21.6 5.7 300 61.4 26.5
-2.1264 49.7405 6.5 9.5 21.6 5.7 300 61.2 26.5
-2.1064 49.7405 6.5 9.5 21.6 5.8 300 60.4 26.4
-2.0864 49.7405 6.5 9.5 21.6 5.8 300 59.6 26.3
-2.0664 49.7405 6.5 9.5 21.6 5.8 300 62.8 27.8
-2.0463 49.7405 6.5 9.4 21.6 5.8 300 71.6 31.5
-2.0263 49.7405 6.5 9.4 21.6 5.8 300 77.2 34.1
-2.0063 49.7405 6.5 9.4 21.5 5.8 300 78.3 35.1
-1.9862 49.7405 6.5 9.4 21.5 5.8 300 78.7 35.7
-1.9662 49.7405 6.5 9.4 21.5 5.8 300 78 35.8
-1.9462 49.7405 6.5 9.4 21.4 5.8 300 69.5 32.6
-1.9261 49.7405 6.5 9.4 21.4 5.8 300 60.8 29.2
-1.9061 49.7405 6.5 9.4 21.3 5.8 300 58.6 28.5
-1.8861 49.7405 6.5 9.4 21.3 5.8 300 59.1 28.9
-1.866 49.7405 6.5 9.4 21.3 5.8 310 59.8 29.4
-1.846 49.7405 6.5 9.4 21.3 5.8 317 59 29.5
-1.826 49.7405 6.5 9.4 21.3 5.8 317 58 29.5
-1.8059 49.7405 6.5 9.4 21.2 5.8 320 59.9 30.7
-1.7859 49.7405 6.5 9.4 21.2 5.8 325 70.3 35.2
-1.7659 49.7405 6.5 9.4 21.2 5.8 325 79.8 39.2
-1.7459 49.7405 6.5 9.4 21.2 5.8 325 83.7 41.1
-1.7258 49.7405 6.5 9.4 21.2 5.8 325 82.8 41
-1.7058 49.7405 6.4 9.4 21.2 5.8 342 81.9 40.9
-1.6858 49.7405 6.5 9.4 21.3 5.8 342 81.6 40.8
-1.6657 49.7405 6.4 9.4 21.3 5.8 342 81.5 40.7
-1.6457 49.7405 6.4 9.4 21.3 5.8 345 81.5 40.6
-1.6257 49.7405 6.4 9.4 21.3 5.8 350 82 40.2
-1.6056 49.7405 6.4 9.4 21.3 5.8 350 82.5 39.7
-1.5856 49.7405 6.4 9.4 21.3 5.8 350 79.4 37.6
-1.5656 49.7405 6.4 9.4 21.3 5.8 350 70.5 33.3
-1.5455 49.7405 6.4 9.5 21.3 5.8 350 65.1 30.4
-1.5255 49.7405 6.4 9.5 21.3 5.8 350 66.9 30.5
-1.5055 49.7405 6.4 9.5 21.3 5.7 350 68.7 30.5
-1.4854 49.7405 6.4 9.5 21.4 5.7 350 70.6 30.1
-1.4654 49.7405 6.4 9.6 21.4 5.7 414 72.3 29.9
-1.4454 49.7405 6.4 9.6 21.4 5.6 500 69.5 28.3
-1.4254 49.7405 6.4 9.6 21.4 5.6 500 60.6 24.3
-1.4053 49.7405 6.4 9.7 21.4 5.5 500 58.4 23.2
-1.3853 49.7405 6.4 9.7 21.5 5.5 500 58.8 23.1
-1.3653 49.7405 6.4 9.8 21.5 5.5 500 59.4 23
-1.3452 49.7405 6.4 9.8 21.5 5.4 500 59.1 22.8
-1.3252 49.7405 6.4 9.8 21.5 5.4 500 58 22.3
-1.3052 49.7405 6.4 9.8 21.7 5.4 500 56.9 21.9
-1.2851 49.7405 6.4 9.9 21.8 5.4 500 63.2 24.4
-1.2651 49.7405 6.4 9.9 21.9 5.5 500 73.6 28.4
-1.2451 49.7405 6.4 9.9 22 5.5 500 78.2 30.1
-1.225 49.7405 6.4 9.9 22.1 5.5 500 78 29.9
-1.205 49.7405 6.4 9.9 22.2 5.5 500 77.3 29.6
-1.185 49.7405 6.4 9.9 22.3 5.6 524 79.3 30.4
-1.1649 49.7405 6.4 9.9 22.4 5.6 525 78 30.1
-1.1449 49.7405 6.4 9.9 22.6 5.6 525 76.9 29.9
-1.1249 49.7405 6.4 9.9 22.7 5.7 525 76.2 29.6
-1.1049 49.7405 6.4 9.9 22.8 5.7 525 75.6 29.3
-1.0848 49.7405 6.4 9.9 22.9 5.7 525 75.2 29.1
-1.0648 49.7405 6.4 9.9 23 5.8 525 74.9 28.8
-1.0448 49.7405 6.4 9.9 23.1 5.8 525 74.7 28.4
-1.0247 49.7405 6.4 9.9 23.2 5.8 525 74.4 28.3
-1.0047 49.7405 6.4 9.9 23.4 5.9 525 74.4 28.1
-0.9847 49.7405 6.4 9.9 23.5 5.9 525 74.2 28.1
-0.9646 49.7405 6.4 9.9 23.6 5.9 525 74.5 27.9
-0.9446 49.7405 6.4 9.9 23.7 5.9 525 75 27.6
-0.9246 49.7405 6.4 9.9 23.7 5.9 536 75.1 27.1
-0.9045 49.7405 6.4 9.9 23.8 5.9 550 75 26.7
-0.8845 49.7405 6.4 9.9 23.9 5.9 550 74.9 26.3
-0.8645 49.7405 6.4 9.9 24 5.9 550 74.6 25.9
-0.8444 49.7405 6.4 9.9 24.1 5.9 550 74 25.3
-0.8244 49.7405 6.4 9.9 24.2 5.9 550 73.7 24.9
-0.8044 49.7405 6.4 9.9 24.3 5.9 550 73.8 24.7
-0.7844 49.7405 6.4 9.9 24.3 5.9 550 74.1 24.6
-0.7643 49.7405 6.4 9.9 24.4 5.9 550 74.9 24.8
-0.7443 49.7405 6.4 10 24.5 5.9 550 75.2 25
-0.7243 49.7405 6.4 10 24.6 6 550 71.3 24
-0.7042 49.7405 6.4 10 24.7 6 550 62 21.1
-0.6842 49.7405 6.4 10 24.8 6.1 550 55.6 19
-0.6642 49.7405 6.4 9.9 24.9 6.1 550 54.7 18.6
-0.6441 49.7405 6.4 9.9 25 6.2 550 56.7 19.2
-0.6241 49.7405 6.4 9.9 25.1 6.2 550 57.6 19.6
-0.6041 49.7405 6.4 9.9 25.2 6.3 550 57.5 19.6
-0.584 49.7405 6.4 9.9 25.3 6.3 550 58.2 19.8
-0.564 49.7405 6.4 9.9 25.4 6.3 550 59.6 20.2
-0.544 49.7405 6.4 9.9 25.5 6.4 550 59.7 20.3
-0.5239 49.7405 6.4 9.9 25.6 6.4 550 60.4 20.4
-0.5039 49.7405 6.4 9.9 25.8 6.5 550 59.8 20.1
-0.4839 49.7405 6.4 9.9 25.8 6.5 550 60 20
-0.4638 49.7405 6.4 9.9 25.9 6.5 550 60.2 20
-0.4438 49.7405 6.4 9.9 25.9 6.5 550 60.2 19.8
-0.4238 49.7405 6.4 9.9 26 6.5 550 60.3 19.6
-0.4038 49.7405 6.4 9.9 26 6.5 550 60.4 19.5
-0.3837 49.7405 6.4 9.9 26.1 6.5 550 60.4 19.2
-0.3637 49.7405 6.4 9.9 26.1 6.5 562 60.5 18.9
-0.3437 49.7405 6.4 9.9 26.2 6.5 575 60.6 18.7
-0.3236 49.7405 6.4 9.9 26.3 6.5 575 61 18.6
-0.3036 49.7405 6.4 9.9 26.3 6.5 575 61.9 18.7
-0.2836 49.7405 6.4 9.9 26.4 6.5 575 62.1 18.6
-0.2635 49.7405 6.4 9.9 26.4 6.5 575 62.5 18.5
-0.2435 49.7405 6.4 9.9 26.5 6.5 575 62.9 18.5
-0.2235 49.7405 6.4 9.9 26.5 6.5 575 63 18.4
-0.2034 49.7405 6.4 9.9 26.6 6.5 575 63.3 18.5
-0.1834 49.7405 6.4 9.9 26.6 6.6 575 63.4 18.5
-0.1634 49.7405 6.4 9.9 26.7 6.6 575 63.5 18.7
-0.1433 49.7405 6.4 9.9 26.7 6.6 575 63.7 18.9
-0.1233 49.7405 6.4 9.9 26.8 6.7 575 63.8 18.9
-0.1033 49.7405 6.4 9.9 26.8 6.7 575 63.9 19
-0.0833 49.7405 6.4 9.9 26.9 6.7 575 63.9 19
-0.0632 49.7405 6.4 9.9 26.9 6.7 575 64 19.2
-0.0432 49.7405 6.4 9.9 27 6.8 575 64 19.4
-0.0232 49.7405 6.4 9.9 27 6.8 575 64.1 19.5
-0.0031 49.7405 6.4 9.8 27.1 6.8 575 64.1 19.7
0.0169 49.7405 6.4 9.8 27.1 6.9 575 64.1 19.9
0.0369 49.7405 6.4 9.8 27.2 6.9 575 64.1 20
0.057 49.7405 6.4 9.8 27.2 6.9 575 64.1 20.2
0.077 49.7405 6.4 9.8 27.3 6.9 575 64.1 20.3
0.097 49.7405 6.4 9.8 27.3 6.9 575 64.1 20.6
0.1171 49.7405 6.4 9.8 27.4 7 575 64.1 20.8
0.1371 49.7405 6.4 9.8 27.4 7 575 64.1 21.1
0.1571 49.7405 6.4 9.8 27.4 7 575 64.1 20.9
0.1772 49.7405 6.4 9.8 27.5 7 575 64.1 20.6
0.1972 49.7405 6.4 9.8 27.6 7 575 64.1 20.5
0.2172 49.7405 6.4 9.8 27.6 7.1 575 64 20.5
0.2372 49.7405 6.4 9.8 27.6 7.1 575 64 20.5
0.2573 49.7405 6.4 9.8 27.7 7.1 575 64 20.5
0.2773 49.7405 6.4 9.8 27.7 7.1 575 64 20.4
0.2973 49.7405 6.4 9.8 27.8 7.2 575 63.9 20.4
0.3174 49.7405 6.4 9.8 27.9 7.2 575 63.9 20.4
0.3374 49.7405 6.4 9.7 27.9 7.3 575 63.9 20.5
0.3574 49.7405 6.4 9.7 27.9 7.3 575 63.9 20.5
0.3775 49.7405 6.4 9.7 28 7.3 575 63.9 20.8
0.3975 49.7405 6.4 9.7 28 7.3 575 63.9 20.9
0.4175 49.7405 6.4 9.7 28 7.4 575 63.8 20.9
0.4376 49.7405 6.4 9.7 28.1 7.4 575 63.8 20.8
0.4576 49.7405 6.4 9.7 28.1 7.4 575 63.8 20.9
0.4776 49.7405 6.4 9.7 28.1 7.4 575 63.8 21
0.4977 49.7405 6.4 9.7 28.2 7.4 575 63.8 21
0.5177 49.7405 6.4 9.7 28.2 7.5 575 63.8 21
0.5377 49.7405 6.4 9.7 28.2 7.5 575 63.7 21.1
0.5577 49.7405 6.4 9.7 28.2 7.5 575 63.7 21.2
0.5778 49.7405 6.4 9.7 28.3 7.5 575 63.7 21.3
0.5978 49.7405 6.4 9.7 28.3 7.5 575 63.7 21.5
0.6178 49.7405 6.4 9.7 28.3 7.5 575 63.7 21.8
0.6379 49.7405 6.4 9.7 28.3 7.6 575 63.7 22.1
0.6579 49.7405 6.4 9.7 28.4 7.6 575 63.7 22.2
0.6779 49.7405 6.4 9.7 28.4 7.6 575 63.7 22.3
0.698 49.7405 6.4 9.7 28.4 7.6 575 63.7 22.5
0.718 49.7405 6.4 9.7 28.4 7.7 575 63.7 22.7
0.738 49.7405 6.4 9.7 28.5 7.7 575 63.6 22.8
0.7581 49.7405 6.4 9.7 28.5 7.7 575 63.6 23
0.7781 49.7405 6.4 9.7 28.5 7.8 575 63.6 23.2
0.7981 49.7405 6.4 9.7 28.5 7.8 575 63.6 23.4
0.8182 49.7405 6.4 9.7 28.5 7.8 575 63.6 23.6
0.8382 49.7405 6.4 9.7 28.5 7.8 575 63.6 23.8
0.8582 49.7405 6.4 9.7 28.5 7.8 575 63.6 24.1
0.8782 49.7405 6.4 9.7 28.5 7.9 575 63.6 24.4
0.8983 49.7405 6.4 9.7 28.4 7.9 575 63.6 24.7
0.9183 49.7405 6.4 9.7 28.4 7.8 575 63.6 25
0.9383 49.7405 6.4 9.7 28.3 7.8 575 63.6 25.4
0.9584 49.7405 6.4 9.7 28.3 7.7 575 63.6 26
0.9784 49.7405 6.4 9.7 28.3 7.7 575 63.6 26.5
0.9984 49.7405 6.4 9.7 28.2 7.6 575 63.6 26.1
1.0185 49.7405 6.4 9.7 28.2 7.6 576 63.6 25.5
1.0385 49.7405 6.4 9.7 28.2 7.6 600 63.6 25.1
1.0585 49.7405 6.4 9.7 28.2 7.6 583 63.6 24.9
1.0786 49.7405 6.4 9.7 28.2 7.6 583 63.6 24.8
1.0986 49.7405 6.4 9.6 28.2 7.7 583 63.5 25
1.1186 49.7405 6.4 9.6 28.2 7.7 575 63.5 24.7
1.1387 49.7405 6.4 9.6 28.2 7.7 575 63.5 24.2
1.1587 49.7405 6.4 9.6 28.2 7.7 575 63.5 23.9
1.1787 49.7405 6.4 9.6 28.2 7.7 575 63.5 23.7
1.1987 49.7405 6.4 9.6 28.2 7.7 575 63.5 23.6
1.2188 49.7405 6.4 9.6 28.2 7.8 575 63.5 23.7
1.2388 49.7405 6.4 9.6 28.3 7.8 575 63.5 23.7
1.2588 49.7405 6.4 9.6 28.3 7.8 575 63.5 23.7
1.2789 49.7405 6.4 9.6 28.3 7.8 575 63.5 23.4
1.2989 49.7405 6.4 9.6 28.3 7.8 575 63.5 23.3
1.3189 49.7405 6.4 9.6 28.2 7.8 575 63.5 23.3
1.339 49.7405 6.4 9.6 28.2 7.8 575 63.5 23.2
1.359 49.7405 6.4 9.6 28.2 7.7 575 63.4 23.2
1.379 49.7405 6.5 9.6 28.2 7.7 575 63.4 23.2
1.3991 49.7405 6.5 9.6 28.2 7.7 575 63.4 23.2
1.4191 49.7405 6.5 9.6 28.1 7.7 575 63.4 23.2
1.4391 49.7405 6.5 9.6 28.1 7.7 575 63.4 23.3
1.4592 49.7405 6.5 9.5 28.1 7.7 575 63.4 23.3
1.4792 49.7405 6.5 9.5 28.2 7.7 575 63.4 23.5
1.4992 49.7405 6.5 9.5 28.2 7.8 575 63.4 24.3
1.5192 49.7405 6.5 9.5 28.2 7.8 575 63.4 25.4
1.5393 49.7405 6.5 9.5 28.2 7.8 575 63.4 25.9
1.5593 49.7405 6.5 9.5 28.2 7.8 575 63.3 25.5
1.5793 49.7405 6.5 9.5 28.3 7.9 575 63.3 25.1
1.5994 49.7405 6.5 9.5 28.3 7.9 575 63.3 25.2
1.6194 49.7405 6.5 9.5 28.3 8 575 63.3 25.7
1.6394 49.7405 6.5 9.5 28.3 8 575 63.3 26.1
1.6595 49.7405 6.5 9.5 28.3 8 575 63.3 26.5
1.6795 49.7405 6.5 9.5 28.4 8.1 575 63.2 26.8
1.6995 49.7405 6.5 9.5 28.4 8.1 575 63.2 27.1
1.7196 49.7405 6.5 9.5 28.4 8.1 575 63.2 27.5
1.7396 49.7405 6.5 9.5 28.4 8.2 575 63.2 28
1.7596 49.7405 6.5 9.5 28.5 8.2 575 63.1 28.6
1.7797 49.7405 6.5 9.5 28.6 8.3 575 63.1 29.4
1.7997 49.7405 6.5 9.6 28.6 8.3 575 63.1 30.1
1.8197 49.7405 6.5 9.7 28.7 8.4 575 63 30.8
1.8397 49.7405 6.5 9.7 28.8 8.4 575 63 31.4
1.8598 49.7405 6.6 9.8 28.8 8.5 545 63 31.9
1.8798 49.7405 6.6 9.9 28.9 8.5 525 63 32.5
1.8998 49.7405 6.6 9.9 28.9 8.5 525 62.9 32.9
1.9199 49.7405 6.6 10 29 8.6 525 62.9 33.3
1.9399 49.7405 6.6 10.1 29 8.6 525 62.9 33.8
1.9599 49.7405 6.6 10.1 29.1 8.6 525 62.9 34.3
1.98 49.7405 6.6 10.2 29.1 8.7 525 62.8 34.5
2 49.7405 6.7 10.2 29.2 8.7 525 62.8 34.8
-10.8 49.7605 6.3 10.1 32.2 9.3 550 58.2 31.7
-10.78 49.7605 6.3 10.1 32.2 9.3 550 58.3 31.6
-10.7599 49.7605 6.3 10.1 32.2 9.3 550 58.2 31.5
-10.7399 49.7605 6.3 10.1 32.2 9.2 550 58.2 31.5
-10.7199 49.7605 6.3 10.1 32.2 9.2 550 58.2 31
-10.6998 49.7605 6.3 10.2 32.2 9.2 550 58.2 30.5
-10.6798 49.7605 6.3 10.2 32.1 9.1 550 58.2 30.4
-10.6598 49.7605 6.3 10.2 32.1 9.1 550 58.2 29.9
-10.6397 49.7605 6.3 10.2 32 9 560 58.2 29.4
-10.6197 49.7605 6.3 10.2 32 9 575 58.1 28.9
-10.5997 49.7605 6.3 10.2 32 9 575 58.1 28.4
-10.5797 49.7605 6.3 10.2 32 8.9 575 58.1 28.1
-10.5596 49.7605 6.3 10.2 31.9 8.9 575 58.1 27.9
-10.5396 49.7605 6.3 10.2 31.9 8.9 575 58.1 27.7
-10.5196 49.7605 6.3 10.2 32 9 575 58.1 27.7
-10.4995 49.7605 6.3 10.2 32.1 9.1 575 58.1 27.9
-10.4795 49.7605 6.3 10.2 32.2 9.2 575 58.1 28.4
-10.4595 49.7605 6.3 10.2 32.3 9.2 575 58.1 29
-10.4394 49.7605 6.3 10.2 32.4 9.3 575 58.1 29.5
-10.4194 49.7605 6.3 10.2 32.5 9.4 575 58.1 29.9
-10.3994 49.7605 6.3 10.2 32.6 9.4 575 58 30.4
-10.3793 49.7605 6.3 10.2 32.7 9.5 575 58 31.5
-10.3593 49.7605 6.3 10.2 32.8 9.6 575 58 32.7
-10.3393 49.7605 6.3 10.2 32.9 9.6 575 58 34.1
-10.3192 49.7605 6.3 10.2 32.9 9.7 575 58 35.7
-10.2992 49.7605 6.3 10.2 33 9.8 575 58 37.1
-10.2792 49.7605 6.3 10.2 33.1 9.8 575 58 38.1
-10.2592 49.7605 6.3 10.2 33.2 9.9 575 58 39
-10.2391 49.7605 6.3 10.2 33.2 10 575 57.9 39.9
-10.2191 49.7605 6.3 10.2 33.3 10 575 57.9 40.7
-10.1991 49.7605 6.3 10.2 33.3 10.1 575 57.9 41.5
-10.179 49.7605 6.3 10.2 33.4 10.1 575 57.9 41.6
-10.159 49.7605 6.3 10.2 33.4 10.1 575 57.9 41
-10.139 49.7605 6.3 10.2 33.5 10.1 575 57.9 39.9
-10.1189 49.7605 6.3 10.2 33.5 10.1 575 58 39.3
-10.0989 49.7605 6.3 10.2 33.5 10.1 575 58.4 39.5
-10.0789 49.7605 6.2 10.2 33.6 10.2 586 58.8 39.6
-10.0588 49.7605 6.3 10.2 33.6 10.2 600 58.9 39.5
-10.0388 49.7605 6.2 10.2 33.7 10.2 600 58.8 39.3
-10.0188 49.7605 6.2 10.2 33.7 10.2 600 58.8 39.3
-9.9987 49.7605 6.2 10.2 33.8 10.2 600 58.7 39.2
-9.9787 49.7605 6.2 10.2 33.8 10.2 600 58.6 39.1
-9.9587 49.7605 6.2 10.2 33.8 10.2 600 58.6 38.9
-9.9387 49.7605 6.2 10.2 33.8 10.2 600 58.6 39
-9.9186 49.7605 6.2 10.2 33.8 10.2 600 59 39.2
-9.8986 49.7605 6.2 10.2 33.8 10.2 600 59.7 39.3
-9.8786 49.7605 6.2 10.2 33.8 10.2 600 59.9 39.3
-9.8585 49.7605 6.2 10.3 33.9 10.2 600 60 39.3
-9.8385 49.7605 6.2 10.3 33.9 10.2 600 60 39.2
-9.8185 49.7605 6.2 10.3 33.9 10.2 600 59.9 39.1
-9.7984 49.7605 6.2 10.3 33.9 10.2 624 59.8 39.1
-9.7784 49.7605 6.2 10.3 33.9 10.2 625 59.7 39.2
-9.7584 49.7605 6.2 10.3 33.9 10.2 625 59.7 39.3
-9.7383 49.7605 6.2 10.3 33.9 10.2 625 59.6 39.4
-9.7183 49.7605 6.2 10.3 33.9 10.2 625 59.5 39
-9.6983 49.7605 6.2 10.3 33.9 10.1 625 59.5 38
-9.6782 49.7605 6.2 10.3 33.9 10.1 625 59.5 37.3
-9.6582 49.7605 6.2 10.3 33.9 10.1 625 59.4 37.5
-9.6382 49.7605 6.2 10.3 33.8 10 625 59.4 38.1
-9.6182 49.7605 6.2 10.3 33.7 10 625 59.4 38.3
-9.5981 49.7605 6.2 10.3 33.7 10 625 59.4 37.5
-9.5781 49.7605 6.2 10.3 33.5 9.9 625 59.3 36.8
-9.5581 49.7605 6.2 10.4 33.4 9.8 625 59.2 36.1
-9.538 49.7605 6.2 10.4 33.3 9.8 625 59.2 35.5
-9.518 49.7605 6.2 10.4 33.3 9.8 637 59.2 35.1
-9.498 49.7605 6.2 10.4 33.2 9.7 650 58.9 34.6
-9.4779 49.7605 6.2 10.4 33.1 9.6 650 58.8 34.2
-9.4579 49.7605 6.2 10.4 33 9.6 650 59 33.9
-9.4379 49.7605 6.2 10.4 33 9.6 650 60 33.7
-9.4178 49.7605 6.2 10.4 33 9.6 650 60.1 32.9
-9.3978 49.7605 6.2 10.4 33 9.7 650 59.8 32.3
-9.3778 49.7605 6.2 10.4 33 9.7 650 59.8 32.7
-9.3577 49.7605 6.2 10.4 32.9 9.7 650 59.7 33.4
-9.3377 49.7605 6.2 10.4 32.9 9.7 650 58.6 33.4
-9.3177 49.7605 6.2 10.4 32.8 9.7 650 58.3 33.2
-9.2977 49.7605 6.2 10.4 32.8 9.7 650 58.6 33.1
-9.2776 49.7605 6.2 10.4 32.8 9.7 650 58.8 33.3
-9.2576 49.7605 6.2 10.4 32.7 9.7 650 59 33.7
-9.2376 49.7605 6.2 10.4 32.7 9.7 650 59.2 34.1
-9.2175 49.7605 6.2 10.4 32.6 9.7 650 59.3 34.8
-9.1975 49.7605 6.2 10.4 32.6 9.7 650 59.4 35.7
-9.1775 49.7605 6.2 10.4 32.5 9.7 650 59.5 36.5
-9.1574 49.7605 6.2 10.4 32.5 9.7 650 59.5 37.1
-9.1374 49.7605 6.2 10.4 32.5 9.7 650 59.5 37.6
-9.1174 49.7605 6.2 10.4 32.5 9.7 650 59.5 38.1
-9.0973 49.7605 6.2 10.4 32.4 9.7 650 59.5 38.5
-9.0773 49.7605 6.2 10.4 32.4 9.7 650 59.5 38.9
-9.0573 49.7605 6.2 10.4 32.3 9.7 650 59.4 38.9
-9.0372 49.7605 6.2 10.4 32.3 9.7 650 59.4 38.5
-9.0172 49.7605 6.2 10.4 32.2 9.7 650 59.2 38.1
-8.9972 49.7605 6.2 10.4 32.2 9.7 650 59 37.7
-8.9772 49.7605 6.2 10.4 32.1 9.7 650 58.8 37.5
-8.9571 49.7605 6.2 10.4 32.1 9.7 650 58.9 37.5
-8.9371 49.7605 6.2 10.4 32 9.7 650 58.3 37.7
-8.9171 49.7605 6.2 10.4 32 9.7 650 57.9 38.4
-8.897 49.7605 6.2 10.4 31.9 9.6 650 57.6 39
-8.877 49.7605 6.1 10.4 31.9 9.6 650 59.8 39.9
-8.857 49.7605 6.2 10.4 31.9 9.6 650 62.7 41
-8.8369 49.7605 6.2 10.4 31.8 9.6 650 64.6 42
-8.8169 49.7605 6.2 10.4 31.9 9.6 650 64.1 43.3
-8.7969 49.7605 6.2 10.4 31.9 9.7 650 63.5 44.5
-8.7768 49.7605 6.2 10.3 32 9.7 650 63.2 45.4
-8.7568 49.7605 6.1 10.3 32.1 9.8 650 63 46.2
-8.7368 49.7605 6.1 10.3 32.1 9.8 650 62.8 46.9
-8.7167 49.7605 6.1 10.3 32.2 9.9 650 62.7 47.7
-8.6967 49.7605 6.1 10.3 32.2 9.9 650 62.6 48.5
-8.6767 49.7605 6.1 10.3 32.3 10 625 62.4 49.6
-8.6567 49.7605 6.1 10.3 32.4 10 625 62.4 51.7
-8.6366 49.7605 6.1 10.2 32.4 10.1 625 62.3 54.1
-8.6166 49.7605 6.1 10.2 32.4 10.1 625 62.3 57
-8.5966 49.7605 6.1 10.2 32.5 10.2 625 62.2 59.9
-8.5765 49.7605 6.1 10.2 32.5 10.2 625 62.2 62.9
-8.5565 49.7605 6.1 10.2 32.5 10.3 625 62.2 65.1
-8.5365 49.7605 6.1 10.2 32.5 10.3 625 62.2 66.1
-8.5164 49.7605 6.1 10.2 32.4 10.3 625 62.2 67
-8.4964 49.7605 6.1 10.2 32.4 10.3 625 62.3 66.4
-8.4764 49.7605 6.1 10.2 32.3 10.2 625 62.3 64.4
-8.4563 49.7605 6.1 10.2 32.3 10.2 625 62.4 62.3
-8.4363 49.7605 6.1 10.2 32.2 10.2 625 62.5 61.1
-8.4163 49.7605 6.1 10.2 32.1 10.1 625 62.7 60
-8.3962 49.7605 6.1 10.2 32 10.1 625 63 58.9
-8.3762 49.7605 6.1 10.2 32 10.1 625 63.3 57.6
-8.3562 49.7605 6.1 10.2 31.9 10 625 63.5 56.1
-8.3362 49.7605 6.1 10.2 31.9 10 625 63.5 54.7
-8.3161 49.7605 6.1 10.2 31.8 10 625 63.5 53.3
-8.2961 49.7605 6.1 10.2 31.7 9.9 625 63.7 52.2
-8.2761 49.7605 6.1 10.2 31.7 9.9 625 63.8 51.4
-8.256 49.7605 6.1 10.2 31.6 9.8 625 63.9 50.9
-8.236 49.7605 6.1 10.2 31.5 9.8 625 64.1 50.4
-8.216 49.7605 6.1 10.2 31.4 9.7 625 64.1 49.1
-8.1959 49.7605 6.1 10.2 31.3 9.7 625 64.3 47.5
-8.1759 49.7605 6.1 10.2 31.2 9.6 625 64.4 46.1
-8.1559 49.7605 6.1 10.2 31.1 9.6 625 64.4 45.5
-8.1358 49.7605 6.1 10.2 31.1 9.5 625 64.5 45.3
-8.1158 49.7605 6.1 10.2 31 9.5 625 64.6 45
-8.0958 49.7605 6.1 10.2 30.9 9.4 625 64.7 44.7
-8.0757 49.7605 6.1 10.2 30.8 9.4 625 64.9 44.4
-8.0557 49.7605 6.1 10.2 30.7 9.3 625 65.1 44
-8.0357 49.7605 6.1 10.2 30.7 9.3 625 65.5 43.3
-8.0156 49.7605 6.1 10.2 30.6 9.2 625 65.8 42.6
-7.9956 49.7605 6.1 10.2 30.6 9.2 625 65 42
-7.9756 49.7605 6.1 10.2 30.5 9.2 625 61.7 41
-7.9556 49.7605 6.1 10.2 30.5 9.2 625 58.5 39.9
-7.9355 49.7605 6.1 10.2 30.4 9.2 625 58.1 39.2
-7.9155 49.7605 6.1 10.2 30.4 9.2 625 58.7 38.5
-7.8955 49.7605 6.1 10.2 30.4 9.2 625 58.7 37.8
-7.8754 49.7605 6.1 10.2 30.3 9.2 625 58.6 37.6
-7.8554 49.7605 6.1 10.2 30.2 9.1 625 58.1 37.5
-7.8354 49.7605 6.1 10.2 30.1 9.1 625 58 37.7
-7.8153 49.7605 6.1 10.2 30.1 9.1 625 58.7 37.8
-7.7953 49.7605 6.1 10.2 30 9.1 625 59.4 38.1
-7.7753 49.7605 6.1 10.2 30 9.1 625 59.6 38.4
-7.7552 49.7605 6.1 10.2 29.9 9.1 625 59.6 38.9
-7.7352 49.7605 6.1 10.2 29.8 9.1 625 59.7 39.5
-7.7152 49.7605 6.1 10.2 29.8 9.1 625 59.6 40.4
-7.6951 49.7605 6.1 10.2 29.8 9.1 625 59.5 41.6
-7.6751 49.7605 6.1 10.2 29.8 9.1 625 59.4 42.6
-7.6551 49.7605 6.1 10.2 29.9 9.2 625 59.1 43.1
-7.6351 49.7605 6.1 10.1 29.9 9.2 625 58.9 43.4
-7.615 49.7605 6.1 10.1 29.9 9.2 625 58.8 43.9
-7.595 49.7605 6.1 10.1 29.9 9.3 625 59 45.3
-7.575 49.7605 6.1 10.1 29.9 9.3 625 58.4 46.2
-7.5549 49.7605 6.1 10.1 29.9 9.3 625 58.6 47.7
-7.5349 49.7605 6.1 10.1 29.9 9.3 625 61.3 50.6
-7.5149 49.7605 6.1 10.1 29.9 9.4 625 64.4 53.6
-7.4948 49.7605 6.1 10.1 29.8 9.4 625 65.6 55.5
-7.4748 49.7605 6.1 10.1 29.8 9.4 625 64.9 56.4
-7.4548 49.7605 6.1 10.1 29.8 9.5 625 64.3 57.4
-7.4347 49.7605 6.1 10.1 29.8 9.5 625 64.5 58.8
-7.4147 49.7605 6.1 10.2 29.8 9.5 625 64.2 60.2
-7.3947 49.7605 6.1 10.2 29.8 9.4 625 64 61.4
-7.3746 49.7605 6.1 10.2 29.7 9.4 625 63.8 62.1
-7.3546 49.7605 6.1 10.2 29.7 9.4 625 63.7 62.4
-7.3346 49.7605 6.1 10.2 29.7 9.4 625 63.6 62.8
-7.3146 49.7605 6.1 10.2 29.7 9.4 625 63.5 63.9
-7.2945 49.7605 6.1 10.2 29.7 9.4 625 63.5 65
-7.2745 49.7605 6.1 10.2 29.7 9.4 625 63.4 65.9
-7.2545 49.7605 6.1 10.2 29.8 9.4 625 63.4 66.5
-7.2344 49.7605 6.1 10.2 29.8 9.4 625 63.4 67.2
-7.2144 49.7605 6.1 10.2 29.8 9.5 625 63.3 66.5
-7.1944 49.7605 6.1 10.2 29.8 9.5 625 63.3 64.7
-7.1743 49.7605 6.1 10.2 29.8 9.5 625 63.3 63
-7.1543 49.7605 6.1 10.2 29.8 9.4 625 63.2 62
-7.1343 49.7605 6.1 10.2 29.7 9.3 625 63.2 61.2
-7.1142 49.7605 6.1 10.2 29.6 9.2 625 63.2 60.1
-7.0942 49.7605 6.1 10.2 29.5 9.1 625 63.2 58.4
-7.0742 49.7605 6.1 10.2 29.4 9 625 63.2 56.4
-7.0541 49.7605 6.1 10.3 29.4 8.9 625 63.2 54.5
-7.0341 49.7605 6.1 10.3 29.4 8.9 625 63.2 52.6
-7.0141 49.7605 6.1 10.3 29.4 8.8 625 63.2 50.6
-6.9941 49.7605 6.1 10.3 29.4 8.8 625 63.2 49
-6.974 49.7605 6.1 10.3 29.4 8.7 625 63.2 47.8
-6.954 49.7605 6.1 10.3 29.4 8.7 625 63.2 46.4
-6.934 49.7605 6.1 10.3 29.4 8.7 625 63.2 44.8
-6.9139 49.7605 6.1 10.3 29.4 8.6 625 63.2 42.6
-6.8939 49.7605 6.1 10.3 29.4 8.5 625 63.2 40.7
-6.8739 49.7605 6.1 10.3 29.5 8.5 625 63.2 40.3
-6.8538 49.7605 6.1 10.3 29.6 8.6 625 63.2 40.6
-6.8338 49.7605 6.1 10.2 29.7 8.7 625 63.2 40.9
-6.8138 49.7605 6.1 10.2 29.8 8.7 625 63.3 40.4
-6.7937 49.7605 6.1 10.2 29.8 8.7 625 63.3 40
-6.7737 49.7605 6.1 10.2 29.8 8.7 625 63.3 39.4
-6.7537 49.7605 6.1 10.2 29.8 8.6 625 63.3 39
-6.7336 49.7605 6.1 10.2 29.8 8.6 625 63.3 38.7
-6.7136 49.7605 6.1 10.2 29.8 8.6 625 63.3 38
-6.6936 49.7605 6.1 10.2 29.8 8.5 625 63.3 37.3
-6.6736 49.7605 6.1 10.2 29.8 8.5 625 63.4 36.6
-6.6535 49.7605 6.1 10.2 29.8 8.4 625 63.4 35.6
-6.6335 49.7605 6.1 10.2 29.8 8.4 625 63.4 34.5
-6.6135 49.7605 6.1 10.2 29.8 8.4 625 63.5 33.5
-6.5934 49.7605 6.1 10.2 29.8 8.3 625 63.6 32.7
-6.5734 49.7605 6.1 10.2 29.8 8.3 625 63.6 31.9
-6.5534 49.7605 6.1 10.2 29.8 8.2 625 63.7 30.9
-6.5333 49.7605 6.1 10.3 29.7 8.2 625 63.8 29.6
-6.5133 49.7605 6.1 10.3 29.6 8.1 625 63.8 28.4
-6.4933 49.7605 6.1 10.3 29.5 7.9 625 64 27.2
-6.4732 49.7605 6.1 10.3 29.4 7.8 628 64.1 26.2
-6.4532 49.7605 6.1 10.3 29.3 7.7 650 64.2 25.3
-6.4332 49.7605 6.1 10.3 29.1 7.6 650 64.4 24.5
-6.4131 49.7605 6.1 10.3 29 7.5 650 64.5 23.8
-6.3931 49.7605 6.1 10.4 28.9 7.4 650 64.7 23.1
-6.3731 49.7605 6.1 10.4 28.8 7.2 650 64.9 22.7
-6.3531 49.7605 6.1 10.4 28.6 7.1 650 65 22.2
-6.333 49.7605 6.1 10.4 28.5 7 650 65.1 21.8
-6.313 49.7605 6.1 10.4 28.4 6.9 650 65.2 21.5
-6.293 49.7605 6.1 10.4 28.4 6.8 650 65.3 21.3
-6.2729 49.7605 6.1 10.4 28.3 6.7 650 65.5 21
-6.2529 49.7605 6.1 10.4 28.2 6.6 650 65.5 20.7
-6.2329 49.7605 6.1 10.4 28.2 6.6 650 65.6 20.4
-6.2128 49.7605 6.1 10.4 28.1 6.6 650 65.6 20.2
-6.1928 49.7605 6.1 10.4 28.1 6.5 650 65.7 19.9
-6.1728 49.7605 6.1 10.4 28 6.5 650 65.7 19.7
-6.1527 49.7605 6.1 10.5 28 6.5 650 65.7 19.5
-6.1327 49.7605 6.1 10.5 27.9 6.4 650 65.6 19.3
-6.1127 49.7605 6.1 10.5 27.9 6.4 650 65.6 19.1
-6.0926 49.7605 6.1 10.5 27.8 6.4 650 65.6 18.9
-6.0726 49.7605 6.1 10.5 27.8 6.3 650 65.6 18.8
-6.0526 49.7605 6.1 10.5 27.7 6.3 650 65.5 18.7
-6.0326 49.7605 6.1 10.5 27.8 6.3 650 65.6 18.7
-6.0125 49.7605 6.1 10.5 27.8 6.4 650 65.6 18.8
-5.9925 49.7605 6.1 10.4 27.8 6.4 650 65.6 18.9
-5.9725 49.7605 6.1 10.4 27.8 6.4 650 65.7 19
-5.9524 49.7605 6.1 10.4 27.9 6.5 650 65.7 19.1
-5.9324 49.7605 6.1 10.4 27.9 6.5 650 65.8 19.3
-5.9124 49.7605 6.1 10.4 27.9 6.5 646 65.8 19.4
-5.8923 49.7605 6.1 10.4 28 6.6 625 65.8 19.6
-5.8723 49.7605 6.1 10.4 28 6.6 625 65.9 19.8
-5.8523 49.7605 6.1 10.4 28.1 6.7 625 66 20
-5.8322 49.7605 6.1 10.4 28.1 6.7 625 66 20.2
-5.8122 49.7605 6.1 10.4 28.1 6.7 625 66.2 20.4
-5.7922 49.7605 6.1 10.4 28.2 6.8 625 66.3 20.5
-5.7721 49.7605 6.1 10.4 28.2 6.8 625 66.4 20.7
-5.7521 49.7605 6.1 10.4 28.2 6.8 625 66.7 20.8
-5.7321 49.7605 6.1 10.4 28.1 6.8 625 66.9 20.9
-5.7121 49.7605 6.1 10.4 28.1 6.8 625 67.1 20.9
-5.692 49.7605 6.1 10.4 28 6.8 625 67.2 20.7
-5.672 49.7605 6.1 10.4 28 6.8 625 67.4 20.4
-5.652 49.7605 6.1 10.4 27.9 6.7 625 67.6 20.3
-5.6319 49.7605 6.1 10.4 27.9 6.7 625 67.9 20.1
-5.6119 49.7605 6.1 10.4 27.8 6.7 625 68.2 20
-5.5919 49.7605 6.1 10.4 27.8 6.6 625 65.9 19.4
-5.5718 49.7605 6.1 10.4 27.7 6.6 625 65.2 19.1
-5.5518 49.7605 6.1 10.4 27.7 6.6 625 65.8 19.2
-5.5318 49.7605 6.1 10.4 27.6 6.6 625 66.4 19.3
-5.5117 49.7605 6.1 10.4 27.6 6.5 625 67 19.4
-5.4917 49.7605 6.1 10.4 27.5 6.5 625 67.5 19.5
-5.4717 49.7605 6.1 10.4 27.5 6.5 625 66.3 19.4
-5.4516 49.7605 6.1 10.4 27.4 6.5 625 63.4 18.9
-5.4316 49.7605 6.1 10.4 27.4 6.5 625 61.1 18.4
-5.4116 49.7605 6.1 10.4 27.4 6.5 625 61.4 18.6
-5.3915 49.7605 6.1 10.4 27.4 6.5 625 62.1 18.9
-5.3715 49.7605 6.1 10.4 27.4 6.5 616 62.6 19.1
-5.3515 49.7605 6.1 10.4 27.3 6.6 575 62.9 19.3
-5.3315 49.7605 6.2 10.4 27.3 6.6 575 63.2 19.6
-5.3114 49.7605 6.2 10.4 27.3 6.6 575 63.5 19.8
-5.2914 49.7605 6.2 10.4 27.3 6.6 575 63.7 20.1
-5.2714 49.7605 6.2 10.4 27.3 6.6 575 64 20.3
-5.2513 49.7605 6.2 10.4 27.2 6.6 575 63.8 20.3
-5.2313 49.7605 6.2 10.4 27.2 6.7 575 63.3 20.2
-5.2113 49.7605 6.2 10.4 27.2 6.7 575 63 20.1
-5.1912 49.7605 6.2 10.4 27.1 6.6 575 63.1 20
-5.1712 49.7605 6.2 10.4 27 6.5 575 63.2 19.9
-5.1512 49.7605 6.2 10.4 26.9 6.5 575 63.2 19.6
-5.1311 49.7605 6.2 10.4 26.8 6.4 575 63.3 19.3
-5.1111 49.7605 6.2 10.4 26.7 6.4 575 63.3 19
-5.0911 49.7605 6.2 10.4 26.7 6.3 575 63.3 18.6
-5.071 49.7605 6.2 10.4 26.6 6.3 575 63 18.3
-5.051 49.7605 6.2 10.4 26.5 6.2 575 62.9 17.9
-5.031 49.7605 6.2 10.4 26.4 6.1 575 62.9 17.7
-5.011 49.7605 6.2 10.4 26.3 6.1 575 63 17.5
-4.9909 49.7605 6.2 10.4 26.3 6 575 63.1 17.2
-4.9709 49.7605 6.2 10.4 26.2 6 575 63.2 17.1
-4.9509 49.7605 6.2 10.4 26.1 5.9 575 63.2 17
-4.9308 49.7605 6.2 10.4 26 5.9 575 63.2 16.9
-4.9108 49.7605 6.2 10.4 25.9 5.8 575 63.3 16.9
-4.8908 49.7605 6.2 10.4 25.9 5.8 575 63.4 16.8
-4.8707 49.7605 6.2 10.4 25.9 5.8 575 63.5 16.9
-4.8507 49.7605 6.2 10.4 25.8 5.8 575 63.5 16.8
-4.8307 49.7605 6.2 10.4 25.8 5.8 575 63.7 16.7
-4.8106 49.7605 6.2 10.3 25.7 5.8 558 63.7 16.7
-4.7906 49.7605 6.2 10.3 25.7 5.8 500 63.8 16.7
-4.7706 49.7605 6.2 10.3 25.6 5.8 500 63.9 16.8
-4.7505 49.7605 6.2 10.3 25.6 5.8 500 63.9 16.8
-4.7305 49.7605 6.2 10.3 25.5 5.7 500 64 16.9
-4.7105 49.7605 6.2 10.3 25.5 5.7 500 64 16.9
-4.6905 49.7605 6.2 10.2 25.4 5.7 500 64 16.9
-4.6704 49.7605 6.2 10.2 25.4 5.7 500 64 16.9
-4.6504 49.7605 6.2 10.2 25.3 5.7 500 63.8 16.9
-4.6304 49.7605 6.2 10.2 25.3 5.7 500 63.7 16.8
-4.6103 49.7605 6.2 10.2 25.2 5.7 500 63.6 17
-4.5903 49.7605 6.2 10.2 25.2 5.6 500 63.6 17.2
-4.5703 49.7605 6.2 10.2 25.2 5.6 500 63.6 17.1
-4.5502 49.7605 6.2 10.2 25.1 5.6 500 63.6 16.7
-4.5302 49.7605 6.2 10.2 25.1 5.6 481 63.6 16.5
-4.5102 49.7605 6.2 10.2 25.1 5.6 475 63.5 16.5
-4.4901 49.7605 6.2 10.2 25 5.6 475 63.5 16.4
-4.4701 49.7605 6.2 10.2 25 5.6 475 63.4 16.4
-4.4501 49.7605 6.2 10.2 25 5.5 475 63.4 16.4
-4.43 49.7605 6.2 10.2 24.9 5.5 475 63.4 16.4
-4.41 49.7605 6.2 10.2 24.9 5.5 475 63.6 16.5
-4.39 49.7605 6.2 10.2 24.8 5.5 475 63.7 16.5
-4.37 49.7605 6.3 10.2 24.8 5.5 475 63.8 16.7
[truncated: 13,658,818 more chars]
